# Supplementary material
Source: Royal Society of Chemistry journal article supplement (doi:10.1039/d6cc01074a)
Supplement: d6cc01074a1.pdf [file d6cc01074a1.pdf]

## Supporting information

### Enantiodivergent Rh<sup>III</sup>-Catalyzed Synthesis of Imidazo[1,5-a]indole

*Marimuthu Bakkiyaraj and Pazhamalai Anbarasan\**

Department of Chemistry, Indian Institute of Technology Madras, Chennai-600036, India.

#### Table of contents

|                                                                                                            |     |
|------------------------------------------------------------------------------------------------------------|-----|
| 1. General comments.....                                                                                   | S2  |
| 2. Analytical methods .....                                                                                | S2  |
| 3. General procedure for the synthesis of substituted <i>N</i> -(pivaloyloxy)-1H-indole-1-carboxamide..... | S3  |
| 4. Optimization.....                                                                                       | S7  |
| 5. General procedure for the synthesis of racemic compounds .....                                          | S9  |
| 6. General procedure for the enantioselective synthesis of Imidazo[1,5-a]indole ( <i>R</i> -isomer).....   | S9  |
| 7. General procedure for the enantioselective synthesis of Imidazo[1,5-a]indole ( <i>S</i> -isomer).....   | S10 |
| 8. Properties of synthesized compounds.....                                                                | S10 |
| 9. Synthetic application.....                                                                              | S42 |
| 10. Control experiments.....                                                                               | S46 |
| 11. Plausible mechanism and stereochemical outcome.....                                                    | S49 |
| 12. Spectral data.....                                                                                     | S50 |
| 13. Crystal data for compound ( <i>S</i> )- <b>3h</b> and ( <i>R</i> )- <b>3h</b> .....                    | S97 |
| 14. References.....                                                                                        | S99 |

## 1. General comments:

All reactions were performed under an atmosphere of air with magnetic stirring, unless otherwise indicated. Solvents such as acetonitrile (CH<sub>3</sub>CN), acetone, tetrahydrofuran (THF), diethyl ether, and other solvents were purchased from commercial sources and used as received. Column chromatography was performed using Rankem Silica gel (100-200 mesh), and the solvent system used, unless otherwise specified, was ethyl acetate-hexane with various percentages of polarity depending on the nature of the substrate. All chemicals and acids were purchased from either Sigma-Aldrich or Spectrochem and, unless otherwise noted, were used as received.

## 2. Analytical Methods:

Analytical thin-layer chromatography was performed with commercial aluminium sheets coated with silica gel (Merck (Supelco), Kieselgel 60 F254). Compounds were visualized by UV-light at 254 nm. NMR data were recorded on Bruker (400 and 500 MHz) spectrometers. <sup>1</sup>H, <sup>13</sup>C, <sup>19</sup>F spectra were referenced to signals of deuterium solvents and residual protonated solvents, respectively. Infrared spectra were recorded on a Thermo Nicolet iS10 FT and Jasco ATR-IR spectrometer. HRMS were recorded by the electrospray ionization (ESI) method on a Q-TOF Micro with lock spray source. The crystal data were collected and integrated using a Bruker AXS kappa Apex2 CCD diffractometer, with graphite monochromated Mo-K $\alpha$  radiation. The enantiomeric ratio (er) of the products was determined by high-performance liquid chromatography (HPLC) with a chiral stationary phase in comparison with the authenticated racemate. All the chiral stationary phases, including IG, IC, IA, IB, ID, were purchased from Daicel Chiral Technologies. Optical rotations recorded on the Labindia polarimeter were reported as follows:  $[\alpha]_D^T$  (c (g/100 mL), in CHCl<sub>3</sub>).

### 3. General procedure for the synthesis of substituted *N*-(pivaloyloxy)-1*H*-indole-1-carboxamide.

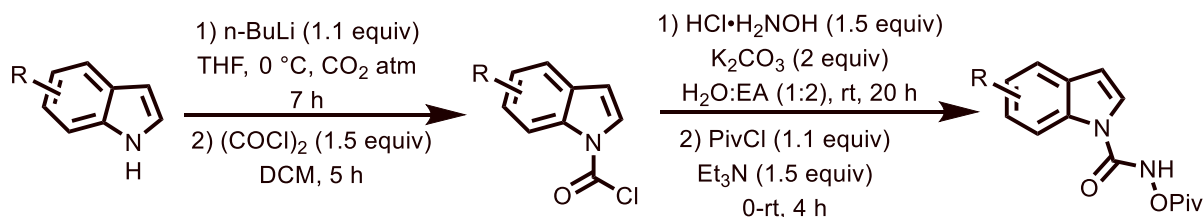

**The synthesis of 1*H*-indole-1-carboxylic acid**<sup>[1]</sup>: In a dry reaction flask, indole (2 g, 17 mmol) in THF (20 mL) was taken. A solution of *n*-BuLi (12 mL, 1.6 M in hexane, 1.1 equiv) was added at 0 °C under a nitrogen atmosphere. After stirring at 0 °C for 2 h, the flask is freed of nitrogen by alternately evacuating and repressurizing with CO<sub>2</sub> gas using a balloon. The mixture was stirred for 5 h under the CO<sub>2</sub> pressure, then quenched carefully by adding cold aqueous HCl solution (2 M) to adjust the pH to 2. The organic phase was extracted with ethyl acetate and dried over anhydrous Na<sub>2</sub>SO<sub>4</sub>. The obtained compound was recrystallized by using hexane as a white solid (2.2 g, 80% yield), which could be used directly in the next step without further purification.

**The synthesis of *N*-hydroxy-1*H*-indole-1-carboxamide**: In a nitrogen-filled flask, the mixture of 1*H*-indole-1-carboxylic acid (1g, 6.2 mmol, 1.0 equiv), oxalyl chloride (1.1 mL, 12.4 mmol, 2 equiv), and a few drops of DMF (ca. 0.1 equiv) in dichloromethane (20 mL) was stirred for 5 h at room temperature. After evaporating under vacuum, the obtained residue was treated with NH<sub>2</sub>OH·HCl (0.650 g, 9.3 mmol, 1.5 equiv) and K<sub>2</sub>CO<sub>3</sub> (1.75 g, 12.4 mmol, 2.0 equiv) followed by EtOAc/water (50 mL, 2:1) were added. After reaction, the reaction mixture was extracted with ethyl acetate. The combined organic layers were dried over Na<sub>2</sub>SO<sub>4</sub>. The solvent was removed in vacuo, and the obtained crude was taken next step without further purification.

**Synthesis of *N*-(pivaloyloxy)-1*H*-indole-1-carboxamide**: The obtained crude *N*-hydroxy-1*H*-indole-1-carboxamide were taken in a reaction flask, and THF (20 mL) and triethylamine (1.5 equiv) were added. Subsequently, pivaloyl chloride (1.1 equiv) was added at 0 °C with constant stirring at room temperature for 4 h. After consuming the starting material, the reaction mixture was quenched with ice-cold water, followed by extraction with ethyl acetate. The combined organic layer was dried over anhydrous Na<sub>2</sub>SO<sub>4</sub> and concentrated under reduced pressure. The resultant crude product was purified by column chromatography to obtain the corresponding compounds.

### N-(pivaloyloxy)-1H-indole-1-carboxamide (1a)

Yield: 45% (three steps yield); colorless solid;  $^1\text{H}$  NMR (400 MHz,  $\text{CDCl}_3$ , 24 °C):  $\delta$  8.90 (br,

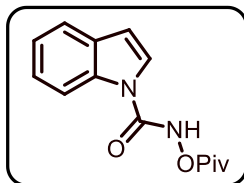

1H), 8.06 (d,  $J$  = 8.5 Hz, 1H), 7.49 (d,  $J$  = 7.5 Hz, 1H), 7.38 (d,  $J$  = 3.5 Hz, 1H), 7.27-7.23 (m, 1H), 7.19-7.15 (m, 1H), 6.55 (d,  $J$  = 3.7 Hz, 1H), 1.29 (s, 9H).  $^{13}\text{C}\{^1\text{H}\}$  NMR (100 MHz,  $\text{CDCl}_3$ , 24 °C):  $\delta$  177.8, 152.4, 135.1, 130.1, 124.9, 123.5, 123.3, 121.2, 114.9, 109.1, 38.4, 27.0.

### 4-methyl-N-(pivaloyloxy)-1H-indole-1-carboxamide (1b)

Yield: 52% (three steps yield); colorless solid;  $^1\text{H}$  NMR (400 MHz,  $\text{CDCl}_3$ , 24 °C):  $\delta$  8.90 (br,

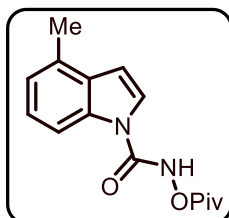

1H), 7.87 (d,  $J$  = 8.5 Hz, 1H), 7.37 (d,  $J$  = 3.7 Hz, 1H), 7.15 (d,  $J$  = 8.4 Hz, 1H), 6.97 (d,  $J$  = 7.2 Hz, 1H), 6.56 (s, 1H), 2.42 (s, 3H), 1.29 (s, 9H)..  $^{13}\text{C}\{^1\text{H}\}$  NMR (100 MHz,  $\text{CDCl}_3$ , 24 °C):  $\delta$  177.7, 152.4, 134.8, 130.7, 129.8, 124.9, 123.7, 122.9, 112.3, 107.4, 38.4, 27.0, 18.4.

### 5-methyl-N-(pivaloyloxy)-1H-indole-1-carboxamide (1c)

Yield: 49% (three steps yield); colorless solid;  $^1\text{H}$  NMR (400 MHz,  $\text{CDCl}_3$ , 24 °C):  $\delta$  8.86 (s,

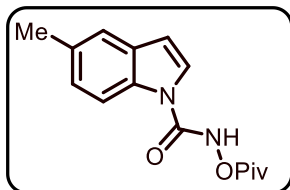

1H), 7.91 (d,  $J$  = 8.5 Hz, 1H), 7.35 (d,  $J$  = 3.7 Hz, 1H), 7.27 (s, 1H), 7.06 (dd,  $J$  = 8.5, 1.6 Hz, 1H), 6.48 (d,  $J$  = 3.7 Hz, 1H), 2.35 (s, 3H), 1.29 (s, 9H).  $^{13}\text{C}\{^1\text{H}\}$  NMR (100 MHz,  $\text{CDCl}_3$ , 24 °C):  $\delta$  177.7, 152.4, 133.2, 132.8, 130.4, 126.2, 123.5, 121.1, 114.4, 108.8, 38.4,

27.0, 21.2.

### 6-methyl-N-(pivaloyloxy)-1H-indole-1-carboxamide (1d)

Yield: 58% (three steps yield); colorless solid;  $^1\text{H}$  NMR (400 MHz,  $\text{CDCl}_3$ , 24 °C):  $\delta$  8.84 (br,

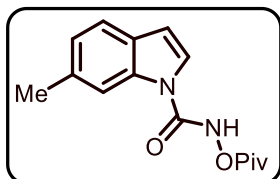

1H), 7.89 (s, 1H), 7.35 (d,  $J$  = 8.1 Hz, 1H), 7.29 (d,  $J$  = 3.7 Hz, 1H), 7.00 (d,  $J$  = 7.8 Hz, 1H), 6.50 (d,  $J$  = 3.7 Hz, 1H), 2.39 (s, 3H), 1.29 (s, 9H).  $^{13}\text{C}\{^1\text{H}\}$  NMR (100 MHz,  $\text{CDCl}_3$ , 24 °C):  $\delta$  177.8, 152.5, 135.5, 135.1, 127.8, 124.8, 122.8, 120.7, 115.1, 109.0, 38.4, 27.0,

21.8.

### 3-methyl-N-(pivaloyloxy)-1H-indole-1-carboxamide (1e)

Yield: 48% (three steps yield); yellow solid;  $^1\text{H}$  NMR (400 MHz,  $\text{CDCl}_3$ , 24 °C):  $\delta$  8.85 (br,

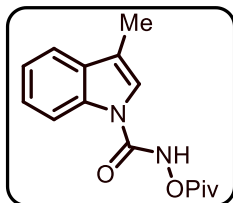

1H), 8.05 (d,  $J = 8.2$  Hz, 1H), 7.43-7.38 (m, 1H), 7.27-7.23 (m, 1H), 7.21-7.20 (m, 1H), 7.12 (s, 1H), 2.15 (s, 3H), 1.29 (s, 9H).  $^{13}\text{C}\{^1\text{H}\}$  NMR (100 MHz,  $\text{CDCl}_3$ , 24 °C):  $\delta$  177.9, 152.4, 135.5, 131.0, 124.9, 123.0, 120.2, 119.2, 118.5, 115.0, 38.4, 27.0, 9.6.

### 5-methoxy-N-(pivaloyloxy)-1H-indole-1-carboxamide (1f)

Yield: 53% (three steps yield); colorless solid;  $^1\text{H}$  NMR (400 MHz,  $\text{CDCl}_3$ , 24 °C):  $\delta$  8.89 (s,

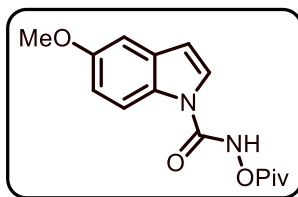

1H), 7.93 (d,  $J = 9.2$  Hz, 1H), 7.34 (d,  $J = 3.7$  Hz, 1H), 6.93,  $J = 2.2$  Hz, 1H), 6.85 (dd,  $J = 8.9, 2.8$  Hz, 1H), 6.46 (d,  $J = 3.7$  Hz, 1H), 3.75 (s, 3H), 1.28 (s, 9H).  $^{13}\text{C}\{^1\text{H}\}$  NMR (100 MHz,  $\text{CDCl}_3$ , 24 °C):  $\delta$  177.8, 156.2, 152.3, 131.0, 129.8, 124.0, 115.6, 113.6, 108.9,

103.8, 55.6, 38.4, 27.0.

### 5-fluoro-N-(pivaloyloxy)-1H-indole-1-carboxamide (1g)

Yield: 42% (three steps yield); colorless solid;  $^1\text{H}$  NMR (400 MHz,  $\text{CDCl}_3$ , 24 °C):  $\delta$  8.93 (br,

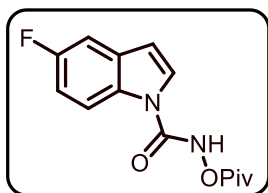

1H), 8.03-8.00 (m, 1H), 7.39 (d,  $J = 3.7$  Hz, 1H), 7.13-7.10 (m, 1H), 6.99-6.93 (m, 1H), 6.49-6.48 (m, 1H), 1.28 (s, 9H).  $^{13}\text{C}\{^1\text{H}\}$  NMR (100 MHz,  $\text{CDCl}_3$ , 24 °C):  $\delta$  177.8, 159.5 (d,  $J = 239.8$  Hz), 152.1, 131.6, 130.9 (d,  $J = 10.7$  Hz), 124.8, 115.9 (d,  $J = 9.2$  Hz), 112.7 (d,  $J$

= 25.3 Hz), 108.8 (d,  $J = 4.0$  Hz), 106.6 (d,  $J = 23.9$  Hz), 38.4, 26.8.  $^{19}\text{F}$  NMR (375 MHz,  $\text{CDCl}_3$ , 24 °C):  $\delta$  -119.95.

### 5-bromo-N-(pivaloyloxy)-1H-indole-1-carboxamide (1h)

Yield: 38% (three steps yield); colorless solid;  $^1\text{H}$  NMR (400 MHz,  $\text{CDCl}_3$ , 24 °C):  $\delta$  8.96 (s,

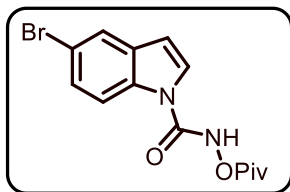

1H), 7.93 (d,  $J = 8.4$  Hz, 1H), 7.58 (s, 1H), 7.35-7.31 (m, 2H), 6.45 (d,  $J = 3.5$  Hz, 1H), 1.28 (s, 9H).  $^{13}\text{C}\{^1\text{H}\}$  NMR (100 MHz,  $\text{CDCl}_3$ , 24 °C):  $\delta$  177.8, 152.0, 133.9, 131.6, 127.7, 124.4, 123.8, 116.6, 116.3, 108.3, 38.5, 26.5.

### 6-chloro-N-(pivaloyloxy)-1H-indole-1-carboxamide (1j)

Yield: 39% (three steps yield); colorless solid;  $^1\text{H}$  NMR (500 MHz,  $\text{CDCl}_3$ , 24 °C):  $\delta$  8.92 (s,

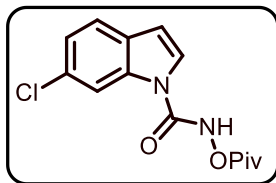

1H), 8.11 (s, 1H), 7.35-7.31 (m, 2H), 7.12 (d,  $J = 8.5$  Hz, 1H), 6.48 (s, 1H), 1.29 (s, 9H).  $^{13}\text{C}\{^1\text{H}\}$  NMR (125 MHz,  $\text{CDCl}_3$ , 24 °C):  $\delta$  177.7, 152.0, 135.6, 130.9, 128.4, 123.9, 123.7, 121.8, 115.3, 108.8, 38.5, 26.9.

### 6-bromo-N-(pivaloyloxy)-1H-indole-1-carboxamide (1k)

Yield: 41% (three steps yield); colorless solid;  $^1\text{H}$  NMR (400 MHz,  $\text{CDCl}_3$ , 24 °C):  $\delta$  8.90 (br,

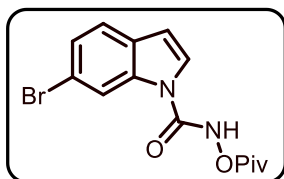

1H), 8.28 (s, 1H), 7.33-7.26 (m, 3H), 6.50 (d,  $J = 3.7$  Hz, 1H), 1.30 (s, 9H).  $^{13}\text{C}\{^1\text{H}\}$  NMR (100 MHz,  $\text{CDCl}_3$ , 24 °C):  $\delta$  177.8, 152.0, 135.9, 128.7, 126.6, 123.7, 122.2, 118.6, 118.1, 108.9, 38.5, 27.0.

### methyl 1-((pivaloyloxy)carbamoyl)-1H-indole-5-carboxylate (1l)

Yield: 29% (three steps yield); colorless solid;  $^1\text{H}$  NMR (500 MHz,  $\text{CDCl}_3$ , 24 °C):  $\delta$  9.01 (s,

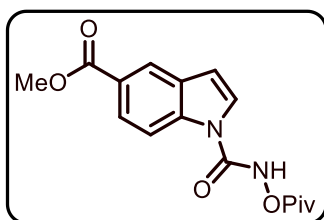

1H), 8.20 (s, 1H), 8.10 (d,  $J = 8.7$  Hz, 1H), 7.93 (dd,  $J = 8.7, 1.8$  Hz, 1H), 7.44 (d,  $J = 3.7$  Hz, 1H), 6.63 (d,  $J = 3.7$  Hz, 1H), 3.86 (s, 3H), 1.3 (s, 9H).  $^{13}\text{C}\{^1\text{H}\}$  NMR (125 MHz,  $\text{CDCl}_3$ , 24 °C):  $\delta$  177.7, 167.3, 152.0, 137.8, 129.7, 126.1, 125.2, 124.7, 123.5,

114.6, 109.4, 52.1, 38.5, 27.0.

### Synthesis of cyclopropenes:

The following cyclopropenes were prepared from the corresponding ketones following the literature procedure.<sup>[2,3]</sup>

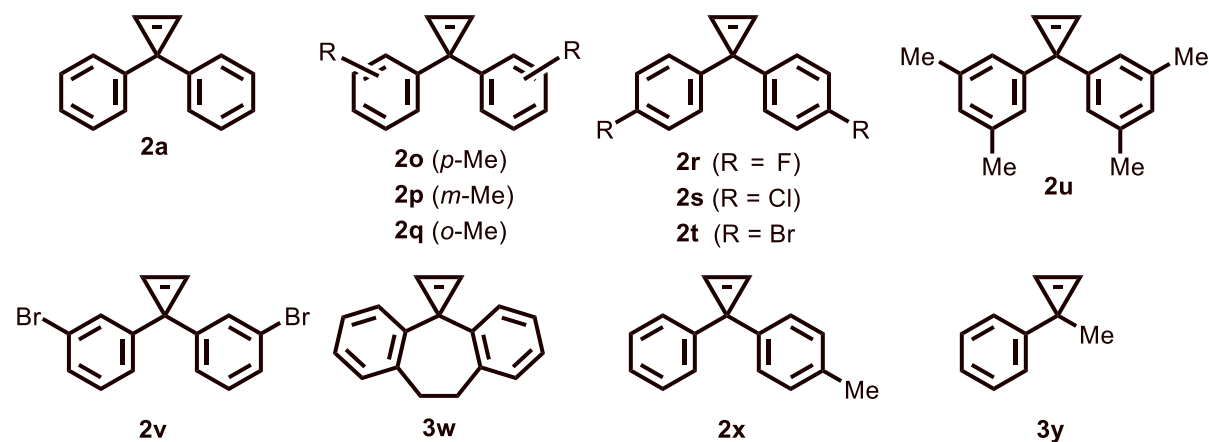

The chiral catalysts **Rh1-Rh6** were prepared from the corresponding *R*-BINOL according to a literature procedure.<sup>4-7</sup>

#### 4. Optimization:

Screened catalyst for the synthesis of **3a-rac**.

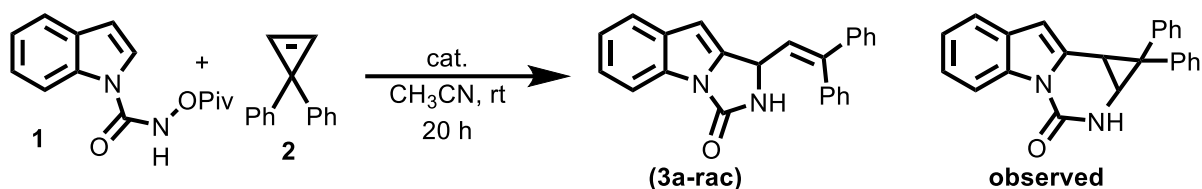

| entry          | Cat (2 mol%)                                  | 3a-rac   | 6-member |
|----------------|-----------------------------------------------|----------|----------|
| 1 <sup>a</sup> | [Cp* <i>Rh</i> Cl <sub>2</sub> ] <sub>2</sub> | -        | observed |
| 2 <sup>b</sup> | [Cp* <i>Rh</i> COD]                           | -        | observed |
| 3 <sup>b</sup> | <i>rac</i> - <b>Rh2</b>                       | observed | -        |

<sup>a</sup> CH<sub>3</sub>CO<sub>2</sub>Na (20 mol%), <sup>b</sup> (BzO)<sub>2</sub> (5 mol%)

Screening of chiral *Rh*-complexes in *Rh*-catalyzed C-H bond functionalization.

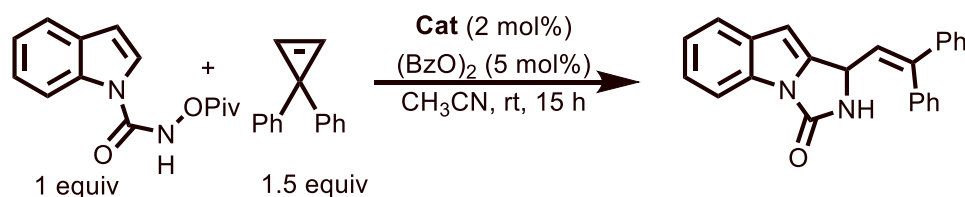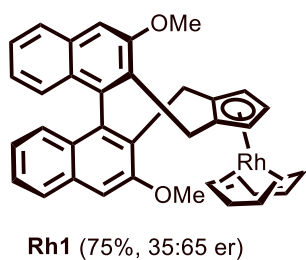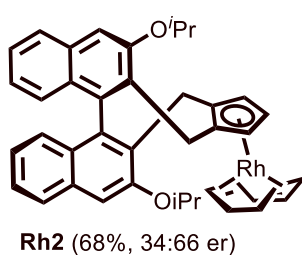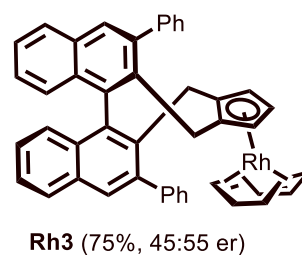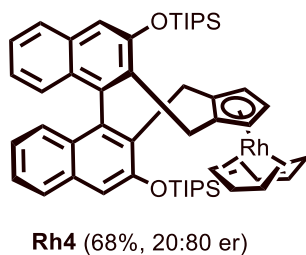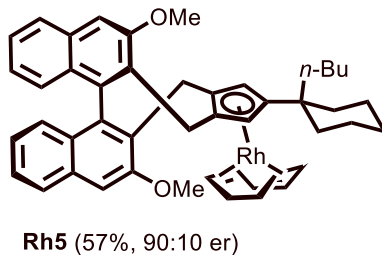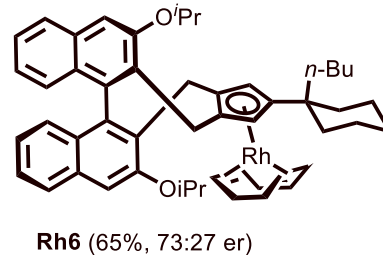

### Solvent screening for the synthesis of *R*-isomer:

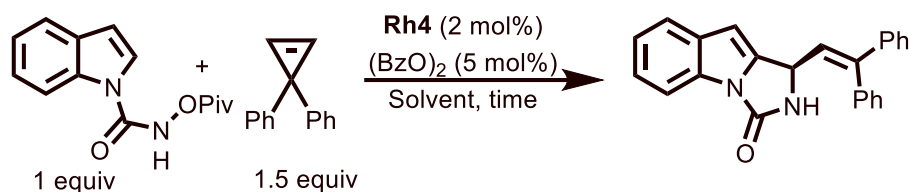

| entry           | solvent                | temp °C   | time h    | yield (%) <sup>a</sup> | (er) <sup>b</sup> |
|-----------------|------------------------|-----------|-----------|------------------------|-------------------|
| 1               | MeOH                   | rt        | 20        | 68                     | 25:75             |
| 2               | DCM                    | rt        | 20        | 35                     | 15:85             |
| 3               | 1,4-dioxane            | rt        | 30        | 57                     | 13:87             |
| 4               | EA                     | rt        | 30        | 75                     | 13:87             |
| 5               | EA                     | 0         | 30        | 35                     | 8:92              |
| 6               | EA                     | 10        | 30        | 78                     | 13:87             |
| 7               | MTBE                   | rt        | 30        | 52                     | 10:90             |
| 8               | Et <sub>2</sub> O      | rt        | 30        | 47                     | 9:91              |
| 9 <sup>c</sup>  | <b>Et<sub>2</sub>O</b> | <b>rt</b> | <b>20</b> | <b>80</b>              | <b>8:92</b>       |
| 10 <sup>c</sup> | EA: Et <sub>2</sub> O  | rt        | 30        | 80                     | 10:90             |
| 11 <sup>c</sup> | EA: Et <sub>2</sub> O  | 10        | 30        | 70                     | 9:91              |
| 12 <sup>c</sup> | EA: Et <sub>2</sub> O  | 20        | 30        | 80                     | 9:91              |

<sup>a</sup> Isolated yield, <sup>b</sup> The enantiomeric ratio (er) were determined by HPLC analysis on a chiral stationary phase, <sup>c</sup> Rh4 (4 mol%).

### Solvent screening for the synthesis of *S*-isomer:

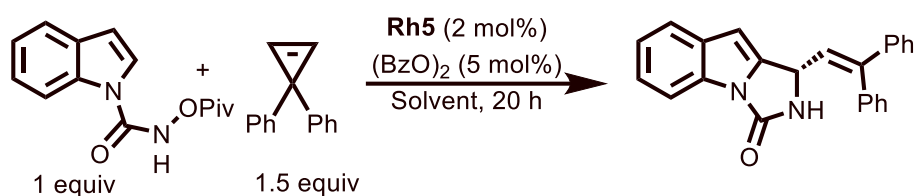

| entry          | solvent                | yield (%) <sup>a</sup> | (er) <sup>b</sup> |
|----------------|------------------------|------------------------|-------------------|
| 1              | <b>Et<sub>2</sub>O</b> | <b>80</b>              | <b>96:4</b>       |
| 2              | EA                     | 54                     | 96:4              |
| 3              | 1,4-dioxane            | 57                     | 96:4              |
| 4              | THF                    | 80                     | 96:4              |
| 5              | Acetone                | 72                     | 96:4              |
| 6              | MeOH                   | 57                     | 88:12             |
| 7 <sup>c</sup> | Et <sub>2</sub> O      | 80                     | 96:4              |
| 8 <sup>d</sup> | Et <sub>2</sub> O      | 80                     | 96:4              |
| 9              | DCM                    | 55                     | 95:5              |
| 10             | MTBE                   | 70                     | 96:4              |

<sup>a</sup> Isolated yield, <sup>b</sup> The enantiomeric ratio (er) were determined by HPLC analysis on a chiral stationary phase, <sup>c</sup> **Rh6** (2 mol%), <sup>d</sup> 20 °C.

### 5. General procedure for the synthesis of racemic compounds **3**

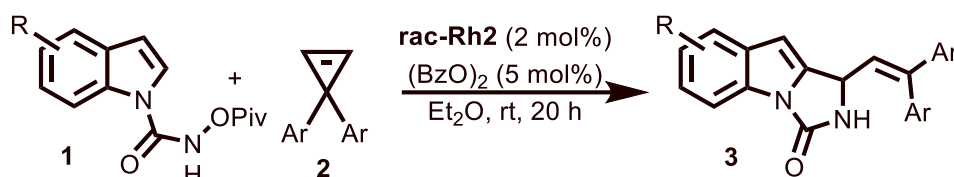

In a reaction tube, (*rac*)-**Rh2** (0.0007 mmol, 2 mol%), (BzO)<sub>2</sub> (0.002 mmol, 5 mol%), and *N*-(pivaloyloxy)-1H-indole-1-carboxamide **1a** (10 mg, 0.04 mmol, 1 equiv) were added. The mixture was dissolved in diethyl ether (1.0 mL), and the reaction mixture was stirred at room temperature for 5 min. Then, the solution of cyclopropene **2a** (15 mg, 0.057 mmol, 1.5 equiv) in diethyl ether (0.5 mL) was added to the reaction tube. After 20 h, the obtained reaction mixture was purified by column chromatography using hexane/ethyl acetate as an eluent to afford product **3** in racemic form.

### 6. General procedure for the enantioselective synthesis of *R*-isomer of Imidazo[1,5-*a*]indole.

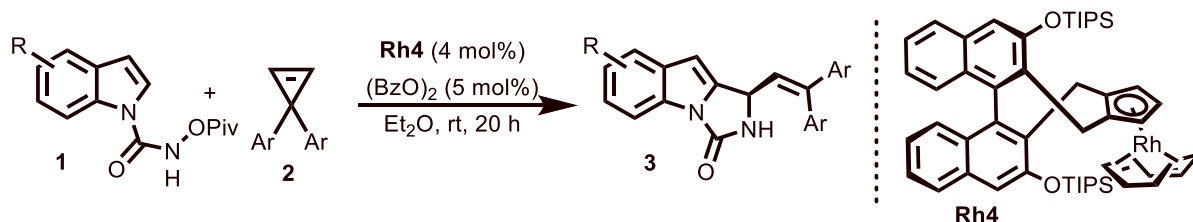

In a reaction tube, (*R*)-**Rh4** (2.8 mg, 0.003 mmol, 4 mol%), (BzO)<sub>2</sub> (1.1 mg, 0.0038 mmol, 5 mol%), and *N*-(pivaloyloxy)-1H-indole-1-carboxamide **1a** (20 mg, 0.076 mmol, 1 equiv) were added. The mixture was dissolved in diethyl ether (1.0 mL), and the reaction mixture was stirred at room temperature for 5 min. Then, the solution of cyclopropene **2a** (25 mg, 0.115 mmol, 1.5 equiv) in diethyl ether (0.5 mL) was added to the reaction tube and stirred at room temperature for 20 h. The reaction was monitored by TLC. After the complete consumption of the starting material, the obtained reaction mixture was purified by column chromatography using hexane/ethyl acetate as an eluent to afford products **3**. All the substrates were synthesized from 20 mg of *N*-(pivaloyloxy)-1H-indole-1-carboxamide.

## 7. General procedure for the enantioselective synthesis of *S*-isomer of Imidazo[1,5-*a*]indole.

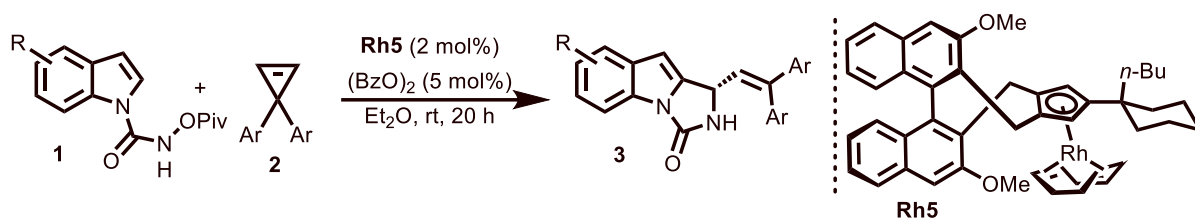

In a reaction tube, (*R*)-**Rh5** (1.8 mg, 0.002 mmol, 2 mol%), (BzO)<sub>2</sub> (1.3 mg, 0.0057 mmol, 5 mol%), and *N*-(pivaloyloxy)-1H-indole-1-carboxamide **1a** (30 mg, 0.11 mmol, 1 equiv) were added. The mixture was dissolved in diethyl ether (1.0 mL), and the reaction mixture was stirred at room temperature for 5 min. Then, the solution of cyclopropene **2a** (35 mg, 0.17 mmol, 1.5 equiv) in diethyl ether (0.5 mL) was added to the reaction tube and stirred at room temperature for 20 h. The reaction was monitored by TLC. After complete consumption of the starting material, the obtained reaction mixture was purified by column chromatography using hexane/ethyl acetate as an eluent to afford products **3a**. All the substrates were synthesized from 30 mg of *N*-(pivaloyloxy)-1H-indole-1-carboxamide.

## 8. Properties of synthesized compounds:

### (*S*)-1-(2,2-diphenylvinyl)-1,2-dihydro-3H-imidazo[1,5-*a*]indol-3-one (**3a**)

Yield: 80% (32 mg); brown colour solid; TLC: (25% EtOAc in hexanes, *R*<sub>f</sub>): 0.3; [ $\alpha$ ]<sub>D</sub><sup>20</sup> +247.1

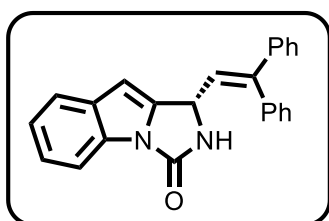

(c 0.1, CHCl<sub>3</sub>); IR (ATR):  $\nu$ (cm<sup>-1</sup>)=3683, 3019, 1742, 1522, 1422, 1214, 747; <sup>1</sup>H NMR (500 MHz, CDCl<sub>3</sub>, 24 °C):  $\delta$  7.91 (d, *J* = 8.0 Hz, 1H, ArH), 7.50 (d, *J* = 8.0 Hz, 1H, ArH), 7.41-7.38 (m, 2H, ArH), 7.36-7.33 (m, 1H, ArH), 7.26-7.24 (m, 2H, ArH), 7.22-7.21 (m, 4H, ArH), 7.19-7.15 (m, 3H, ArH), 6.35 (s, 1H, ArH), 5.92 (d,

*J* = 9.4 Hz, 1H, =CH), 5.66 (s, 1H, NH), 5.27 (d, *J* = 9.4 Hz, 1H, CH). <sup>13</sup>C {<sup>1</sup>H} NMR (125 MHz, CDCl<sub>3</sub>, 24 °C):  $\delta$  153.1 (C=O), 146.9 (CAr), 140.6 (CAr), 140.3 (CAr), 138.2 (CAr), 133.5 (CAr), 130.5 (CAr), 129.7 (C-HAr), 128.7 (C-HAr), 128.39 (C-HAr), 128.33 (C-HAr), 128.2 (C-HAr), 127.6 (C-HAr), 124.1 (=CH), 123.2 (C-HAr), 122.7 (C-HAr), 121.0 (C-HAr), 112.6 (C-HAr), 98.2 (C-HAr), 52.0 (C-H). HRMS (ESI/Q-TOF) *m/z*: [M + H]<sup>+</sup> Calcd for C<sub>24</sub>H<sub>19</sub>N<sub>2</sub>O 351.1492; Found 351.1494.

The enantiomeric ratio (96:4) was determined by Daicel Chiralpak IB (35 °C), Hexane/IPA = 85/15, 1.0 mL/min,  $\lambda$  = 254 nm, tR (major) = 7.64 min, tR (minor) = 11.75 min.

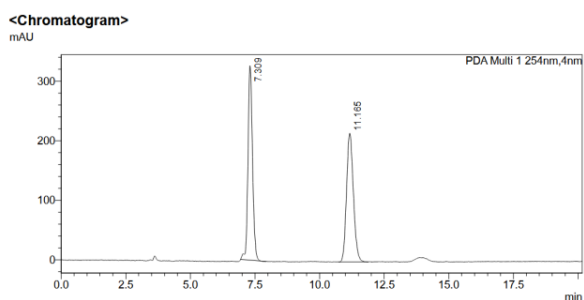

<Peak Table>

| Peak# | Ret. Time | Area    | Area%   | Height% |
|-------|-----------|---------|---------|---------|
| 1     | 7.309     | 3984011 | 49.991  | 60.171  |
| 2     | 11.165    | 3985421 | 50.009  | 39.829  |
| Total |           | 7969431 | 100.000 | 100.000 |

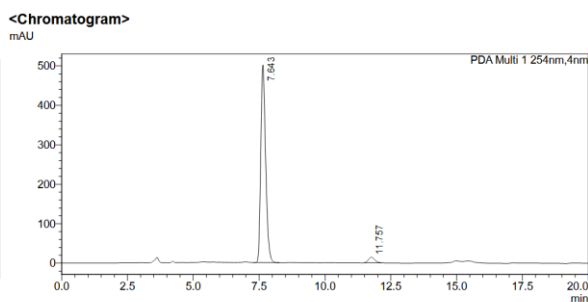

<Peak Table>

| Peak# | Ret. Time | Area    | Area%   | Height% |
|-------|-----------|---------|---------|---------|
| 1     | 7.563     | 6433238 | 96.294  | 97.185  |
| 2     | 11.757    | 247603  | 3.706   | 2.815   |
| Total |           | 6680841 | 100.000 | 100.000 |

### (R)-1-(2,2-diphenylvinyl)-1,2-dihydro-3H-imidazo[1,5-a]indol-3-one (3a)

Yield: 80% (22 mg); brown colour solid,  $[\alpha]_D^{20} -233.3$  (c 0.1,  $\text{CHCl}_3$ ).

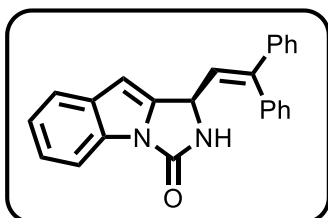

The enantiomeric ratio (8:92) was determined by Daicel Chiralpak IB (35 °C), Hexane/IPA = 85/15, 1.0 mL/min,  $\lambda = 254$  nm, tR (minor) = 7.56 min, tR (major) = 11.34 min.

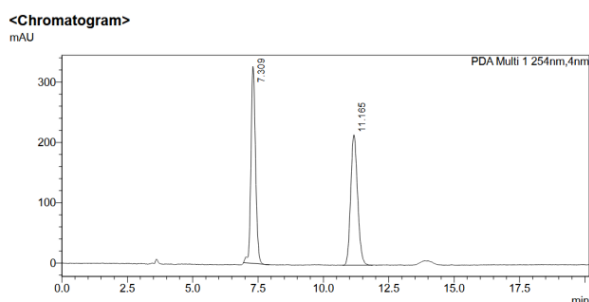

<Peak Table>

| Peak# | Ret. Time | Area    | Area%   | Height% |
|-------|-----------|---------|---------|---------|
| 1     | 7.309     | 3984011 | 49.991  | 60.171  |
| 2     | 11.165    | 3985421 | 50.009  | 39.829  |
| Total |           | 7969431 | 100.000 | 100.000 |

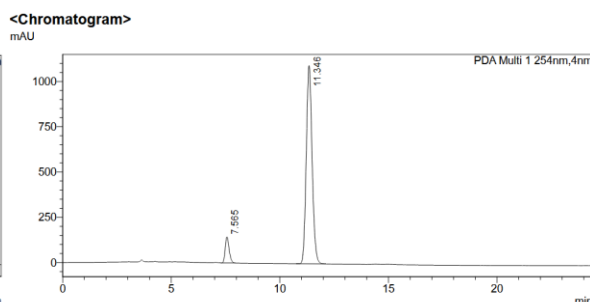

<Peak Table>

| Peak# | Ret. Time | Area     | Area%   | Height% |
|-------|-----------|----------|---------|---------|
| 1     | 7.565     | 1801673  | 8.084   | 11.593  |
| 2     | 11.346    | 2048517  | 91.916  | 88.407  |
| Total |           | 22287590 | 100.000 | 100.000 |

### (S)-1-(2,2-diphenylvinyl)-8-methyl-1,2-dihydro-3H-imidazo[1,5-a]indol-3-one (3b)

Yield: 66% (26 mg); brown colour solid; TLC: (25% EtOAc in hexanes,  $R_f$ ): 0.3;  $[\alpha]_D^{20} +245.9$

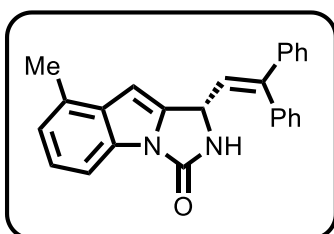

(c 0.1,  $\text{CHCl}_3$ ); IR (ATR):  $\nu(\text{cm}^{-1}) = 3683, 3458, 3257, 3020, 2925, 1733, 1422, 1214, 754$ ;  $^1\text{H NMR}$  (400 MHz,  $\text{CDCl}_3$ , 24 °C):  $\delta$  7.86 (d,  $J = 8.1$  Hz, 1H), 7.53-7.49 (m, 2H), 7.47-7.43 (m, 1H), 7.39-7.37 (m, 2H), 7.31-7.28 (m, 5H), 7.23 (t,  $J = 7.5$  Hz, 1H), 7.07 (d,  $J = 7.3$  Hz, 1H), 6.47 (s, 1H), 6.02 (d,  $J = 9.4$  Hz, 1H), 5.99 (s, 1H), 5.37 (d,  $J = 9.4$  Hz, 1H), 2.57 (s, 3H).  $^{13}\text{C}\{^1\text{H}\}$  NMR (100 MHz,  $\text{CDCl}_3$ , 24 °C):  $\delta$  152.9, 146.9, 140.6, 139.7, 138.2, 133.2, 130.4, 130.2, 129.7, 128.7, 128.38, 128.32, 128.2,

127.6, 124.2, 123.3, 123.0, 110.1, 96.7, 52.0, 18.7. HRMS (ESI/Q-TOF)  $m/z$ :  $[M + H]^+$  Calcd for  $C_{25}H_{21}N_2O$  365.1648; Found 365.1654.

The enantiomeric ratio (97:3) was determined by Daicel Chiralpak IB (35 °C), Hexane/IPA = 85/15, 1.0 mL/min,  $\lambda = 254$  nm,  $t_R$  (major) = 6.80 min,  $t_R$  (minor) = 9.41 min.

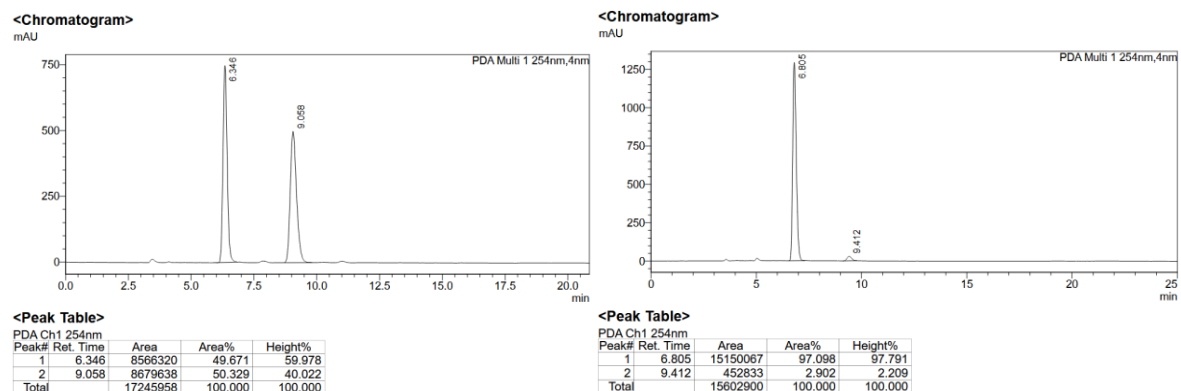

### (*R*)-1-(2,2-diphenylvinyl)-8-methyl-1,2-dihydro-3H-imidazo[1,5-a]indol-3-one (3b)

Yield: 65% (17 mg); brown colour solid,  $[\alpha]_D^{20} -158.8$  (c 0.1,  $CHCl_3$ ).

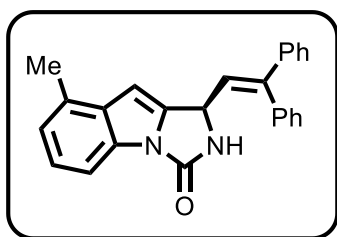

The enantiomeric ratio (15:85) was determined by Daicel Chiralpak IB (35 °C), Hexane/IPA = 85/15, 1.0 mL/min,  $\lambda = 254$  nm,  $t_R$  (minor) = 6.34 min,  $t_R$  (major) = 9.02 min.

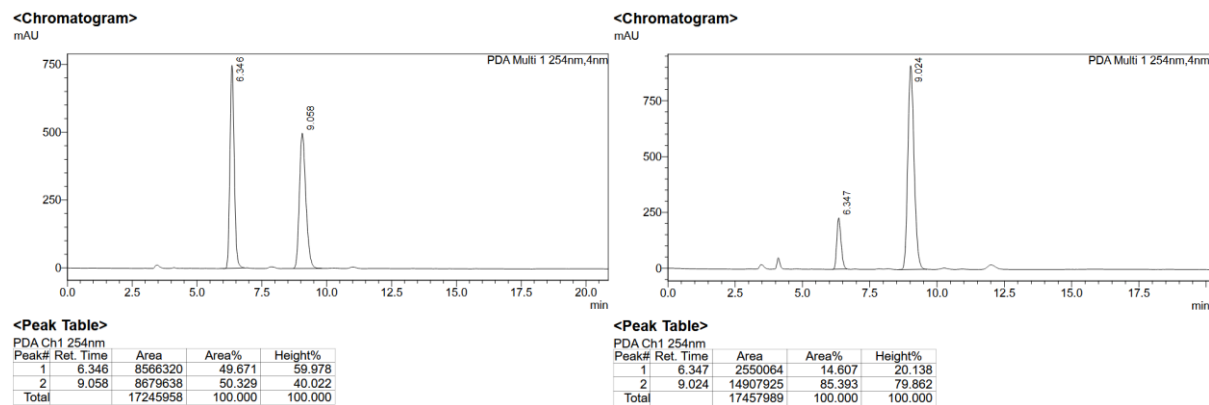

### (S)-1-(2,2-diphenylvinyl)-7-methyl-1,2-dihydro-3H-imidazo[1,5-a]indol-3-one (3c)

Yield: 60% (24 mg); brown colour solid; TLC: (25% EtOAc in hexanes,  $R_f$ ): 0.3;  $[\alpha]_D^{20} +158.4$

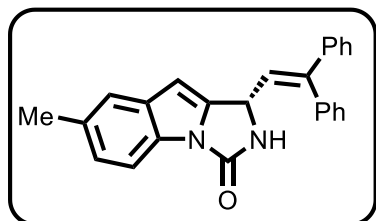

(c 0.1,  $\text{CHCl}_3$ ); IR (ATR):  $\nu(\text{cm}^{-1}) = 3602, 3441, 3018, 2892, 1720, 1403, 1230, 768$ ;  $^1\text{H NMR}$  (400 MHz,  $\text{CDCl}_3$ , 24 °C):  $\delta$  7.77 (d,  $J = 8.4$  Hz, 1H), 7.40-7.30 (m, 3H), 7.27-7.23 (m, 3H), 7.21-7.51 (m, 5H), 7.02 (dd,  $J = 9.6, 1.3$  Hz, 1H), 6.25-6.24 (m, 1H), 5.94 (s, 1H), 5.90 (d,  $J = 9.4$  Hz, 1H), 5.23 (d,  $J = 9.4$

Hz, 1H), 2.36 (s, 3H).  $^{13}\text{C}\{^1\text{H}\}$  NMR (100 MHz,  $\text{CDCl}_3$ , 24 °C):  $\delta$  153.0, 146.8, 140.6, 140.4, 138.3, 133.7, 132.2 x 2, 129.7, 128.7, 128.3, 128.29, 128.22, 127.6, 124.7, 124.2, 120.8, 112.1, 97.9, 52.0, 21.6. HRMS (ESI/Q-TOF)  $m/z$ :  $[\text{M} + \text{H}]^+$  Calcd for  $\text{C}_{25}\text{H}_{21}\text{N}_2\text{O}$  365.1648; Found 365.1650.

The enantiomeric ratio (97:3) was determined by Daicel Chiralpak IB (35 °C), Hexane/IPA = 85/15, 1.0 mL/min,  $\lambda = 254$  nm,  $t_R$  (major) = 6.41 min,  $t_R$  (minor) = 9.06 min.

<Chromatogram>  
mAU

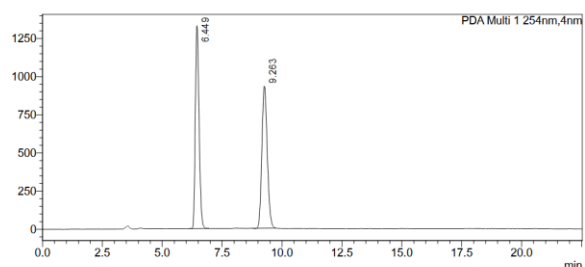

<Peak Table>

| Peak# | Ret. Time | Area     | Area%   | Height% |
|-------|-----------|----------|---------|---------|
| 1     | 6.449     | 14552917 | 49.923  | 58.830  |
| 2     | 9.263     | 14597812 | 50.077  | 41.170  |
| Total |           | 29150729 | 100.000 | 100.000 |

<Chromatogram>  
mAU

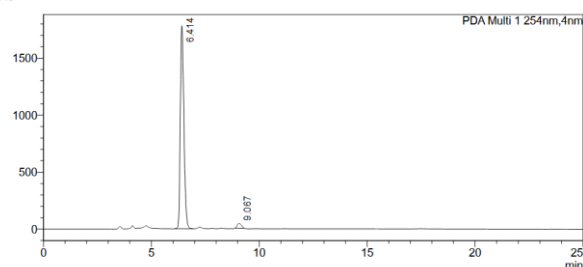

<Peak Table>

| Peak# | Ret. Time | Area     | Area%   | Height% |
|-------|-----------|----------|---------|---------|
| 1     | 6.414     | 20643988 | 97.325  | 97.647  |
| 2     | 9.067     | 567503   | 2.675   | 2.353   |
| Total |           | 21211491 | 100.000 | 100.000 |

### (R)-1-(2,2-diphenylvinyl)-7-methyl-1,2-dihydro-3H-imidazo[1,5-a]indol-3-one (3c)

Yield: 69% (18 mg); brown colour solid,  $[\alpha]_D^{20} -128.8$  (c 0.1,  $\text{CHCl}_3$ ).

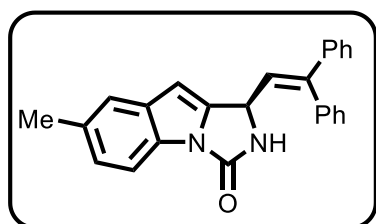

The enantiomeric ratio (12:88) was determined by Daicel Chiralpak IB (35 °C), Hexane/IPA = 85/15, 1.0 mL/min,  $\lambda = 254$  nm,  $t_R$  (minor) = 6.28 min,  $t_R$  (major) = 8.93 min.

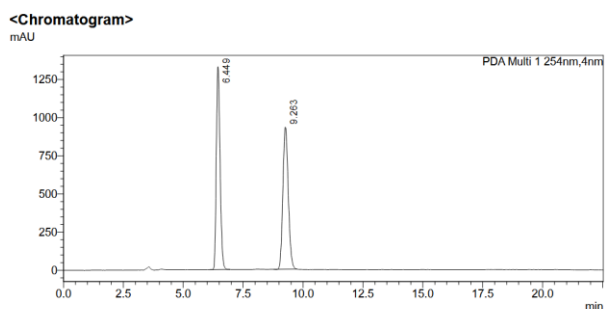

<Peak Table>  
PDA Ch1 254nm

| Peak# | Ret. Time | Area     | Area%   | Height% |
|-------|-----------|----------|---------|---------|
| 1     | 6.449     | 14552917 | 49.923  | 58.830  |
| 2     | 9.263     | 14597812 | 50.077  | 41.170  |
| Total |           | 29150729 | 100.000 | 100.000 |

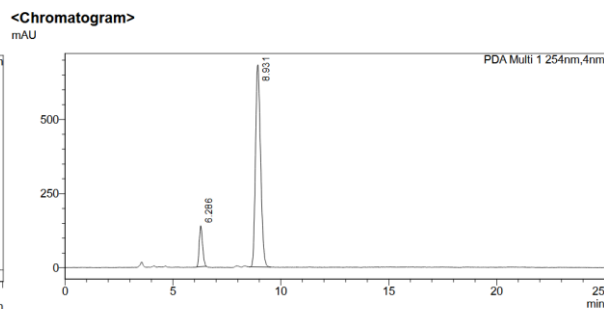

<Peak Table>  
PDA Ch1 254nm

| Peak# | Ret. Time | Area     | Area%   | Height% |
|-------|-----------|----------|---------|---------|
| 1     | 6.286     | 1472779  | 11.570  | 16.843  |
| 2     | 8.931     | 11256834 | 88.430  | 83.157  |
| Total |           | 12729614 | 100.000 | 100.000 |

### (S)-1-(2,2-diphenylvinyl)-6-methyl-1,2-dihydro-3H-imidazo[1,5-a]indol-3-one (3d)

Yield: 77% (31 mg); brown colour solid; TLC: (25% EtOAc in hexanes,  $R_f$ ): 0.3;  $[\alpha]_D^{20} +187.6$

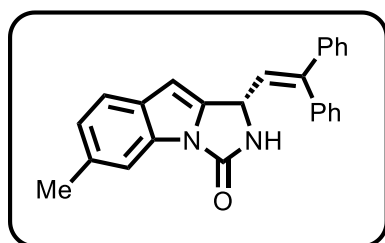

(c 0.1,  $\text{CHCl}_3$ ); IR (ATR):  $\nu(\text{cm}^{-1}) = 3683, 3458, 3020, 1735, 1447, 1394, 1215, 753$ ;  $^1\text{H}$  NMR (500 MHz,  $\text{DMSO}-d_6, 24^\circ\text{C}$ ):  $\delta$  8.63 (s, 1H), 7.66 (s, 1H), 7.54-7.51 (m, 2H), 7.48-7.43 (m, 2H), 7.38-7.36 (m, 2H), 7.34-7.29 (m, 3H), 7.25-7.23 (m, 2H), 7.03 (dd,  $J = 8.1, 1.0$  Hz, 1H), 6.47 (d,  $J = 1.0$  Hz, 1H), 6.05 (d,  $J = 9.4$  Hz, 1H), 5.11 (d,  $J = 9.4$  Hz, 1H), 2.42 (s, 3H).  $^{13}\text{C}\{^1\text{H}\}$  NMR (125 MHz,  $\text{DMSO}-d_6, 24^\circ\text{C}$ ):  $\delta$  152.7, 145.1, 140.8, 140.4, 138.4, 132.5, 131.4, 130.5, 130.0, 129.1, 128.8, 128.5, 128.4, 127.6, 125.5, 124.1, 121.1, 112.1, 97.5, 51.9, 21.7. HRMS (ESI/Q-TOF)  $m/z$ :  $[\text{M} + \text{H}]^+$  Calcd for  $\text{C}_{25}\text{H}_{21}\text{N}_2\text{O}$  365.1648; Found 365.1651.

The enantiomeric ratio (98:2) was determined by Daicel Chiralpak IB ( $35^\circ\text{C}$ ), Hexane/IPA = 85/15, 1.0 mL/min,  $\lambda = 254$  nm,  $t_R$  (major) = 5.99 min,  $t_R$  (minor) = 8.30 min.

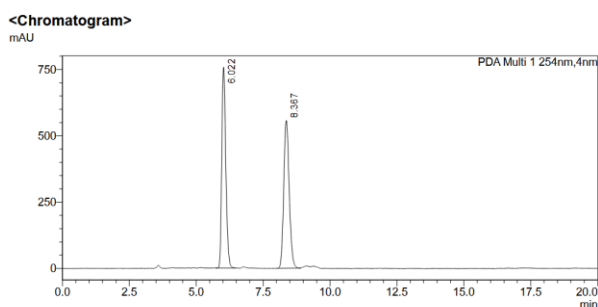

<Peak Table>  
PDA Ch1 254nm

| Peak# | Ret. Time | Area     | Area%   | Height% |
|-------|-----------|----------|---------|---------|
| 1     | 6.022     | 7881628  | 49.918  | 57.624  |
| 2     | 8.367     | 7907637  | 50.082  | 42.376  |
| Total |           | 15789265 | 100.000 | 100.000 |

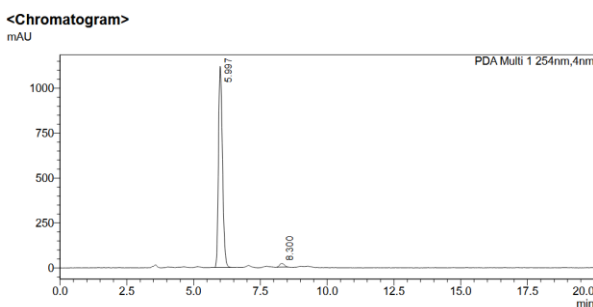

<Peak Table>  
PDA Ch1 254nm

| Peak# | Ret. Time | Area     | Area%   | Height% |
|-------|-----------|----------|---------|---------|
| 1     | 5.997     | 11634096 | 97.899  | 98.190  |
| 2     | 8.300     | 249722   | 2.101   | 1.810   |
| Total |           | 11883819 | 100.000 | 100.000 |

**(R)-1-(2,2-diphenylvinyl)-6-methyl-1,2-dihydro-3H-imidazo[1,5-a]indol-3-one (3d)**

Yield: 80% (22 mg); brown colour solid,  $[\alpha]_D^{20} -226.8$  (c 0.1,  $\text{CHCl}_3$ ).

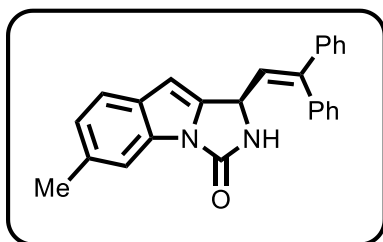

The enantiomeric ratio (12:88) was determined by Daicel Chiralpak IB (35 °C), Hexane/IPA = 85/15, 1.0 mL/min,  $\lambda = 254$  nm,  $t_R$  (minor) = 6.07 min,  $t_R$  (major) = 8.46 min.

<Chromatogram>  
mAU

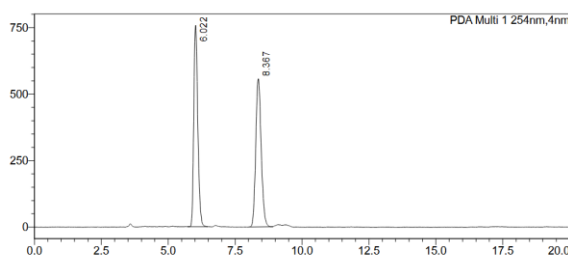

<Peak Table>

| Peak# | Ret. Time | Area     | Area%   | Height% |
|-------|-----------|----------|---------|---------|
| 1     | 6.022     | 7881628  | 49.918  | 57.624  |
| 2     | 8.367     | 7907637  | 50.082  | 42.376  |
| Total |           | 15789265 | 100.000 | 100.000 |

<Chromatogram>  
mAU

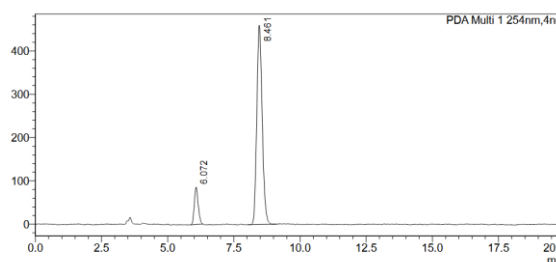

<Peak Table>

| Peak# | Ret. Time | Area    | Area%   | Height% |
|-------|-----------|---------|---------|---------|
| 1     | 6.072     | 879602  | 11.807  | 15.793  |
| 2     | 8.461     | 6570092 | 88.193  | 84.207  |
| Total |           | 7449694 | 100.000 | 100.000 |

**(S)-1-(2,2-diphenylvinyl)-9-methyl-1,2-dihydro-3H-imidazo[1,5-a]indol-3-one (3e)**

Yield: 80% (32 mg); brown colour solid; TLC: (25% EtOAc in hexanes,  $R_f$ ): 0.3;  $[\alpha]_D^{20} -30.3$

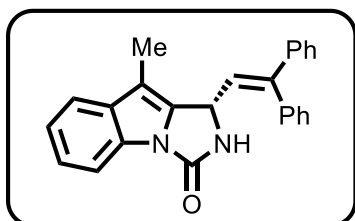

(c 0.1,  $\text{CHCl}_3$ ); IR (ATR):  $\nu(\text{cm}^{-1}) = 3098, 2982, 1758, 1493, 1353, 1273, 618$ ;  $^1\text{H}$  NMR (500 MHz,  $\text{DMSO}-d_6, 24$  °C):  $\delta$  8.62 (s, 1H), 7.78 (d,  $J = 7.9$  Hz, 1H), 7.55-7.52 (m, 3H), 7.46-7.43 (m, 1H), 7.39-7.37 (m, 2H), 7.34-7.29 (m, 3H), 7.26-7.18 (m, 4H), 6.01 (d,  $J = 9.9$  Hz, 1H), 5.13 (d,  $J = 9.9$  Hz, 1H), 2.14 (s,

3H).  $^{13}\text{C}\{^1\text{H}\}$  NMR (125 MHz,  $\text{DMSO}-d_6, 24$  °C):  $\delta$  152.7, 145.7, 141.0, 138.6, 136.4x2, 134.2, 129.9, 129.2, 128.9, 128.5, 128.4, 127.6, 124.5, 123.1, 122.1, 119.5, 111.9, 106.0, 51.6, 8.2.

HRMS (ESI/Q-TOF)  $m/z$ :  $[\text{M} + \text{H}]^+$  Calcd for  $\text{C}_{25}\text{H}_{21}\text{N}_2\text{O}$  365.1648; Found 365.1649.

The enantiomeric ratio (95:5) was determined by Daicel Chiralpak IB (35 °C), Hexane/IPA = 85/15, 1.0 mL/min,  $\lambda = 254$  nm,  $t_R$  (major) = 11.85 min,  $t_R$  (minor) = 7.15 min.

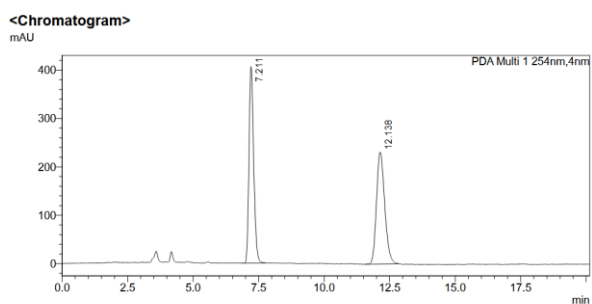

<Peak Table>  
PDA Ch1 254nm

| Peak# | Ret. Time | Area     | Area%   | Height% |
|-------|-----------|----------|---------|---------|
| 1     | 7.211     | 5061357  | 50.064  | 63.733  |
| 2     | 12.138    | 5048395  | 49.936  | 36.267  |
| Total |           | 10109751 | 100.000 | 100.000 |

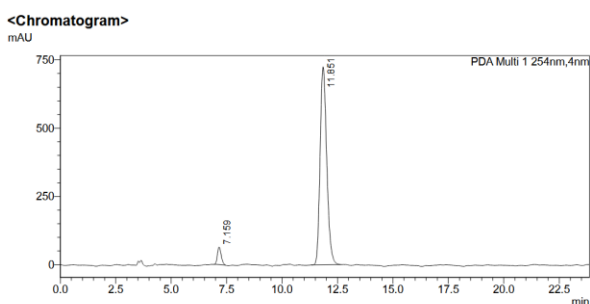

<Peak Table>  
PDA Ch1 254nm

| Peak# | Ret. Time | Area     | Area%   | Height% |
|-------|-----------|----------|---------|---------|
| 1     | 7.159     | 781055   | 4.806   | 8.149   |
| 2     | 11.851    | 15074419 | 95.194  | 91.851  |
| Total |           | 15835474 | 100.000 | 100.000 |

**(S)-1-(2,2-diphenylvinyl)-9-methyl-1,2-dihydro-3H-imidazo[1,5-a]indol-3-one (3e)**

Yield: 60% (17 mg); brown colour solid,  $[\alpha]_D^{20} -15.5$  (c 0.1, CHCl<sub>3</sub>).

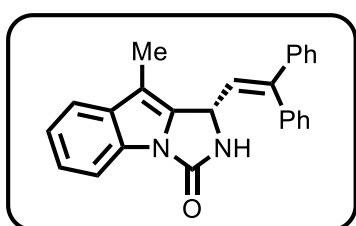

The enantiomeric ratio (30:70) was determined by Daicel Chiralpak IB (35 °C), Hexane/IPA = 85/15, 1.0 mL/min,  $\lambda = 254$  nm, tR (minor) = 7.19 min, tR (major) = 11.96 min.

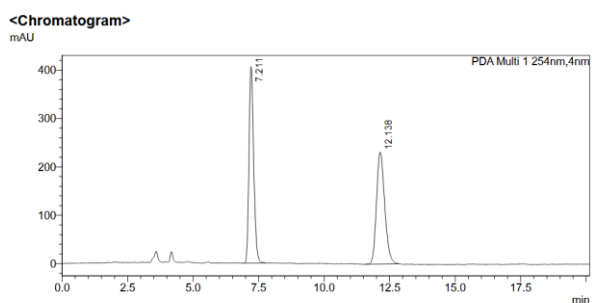

<Peak Table>  
PDA Ch1 254nm

| Peak# | Ret. Time | Area     | Area%   | Height% |
|-------|-----------|----------|---------|---------|
| 1     | 7.211     | 5061357  | 50.064  | 63.733  |
| 2     | 12.138    | 5048395  | 49.936  | 36.267  |
| Total |           | 10109751 | 100.000 | 100.000 |

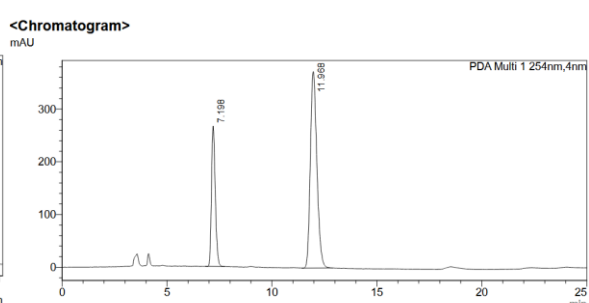

<Peak Table>  
PDA Ch1 254nm

| Peak# | Ret. Time | Area     | Area%   | Height% |
|-------|-----------|----------|---------|---------|
| 1     | 7.198     | 3356407  | 29.335  | 41.701  |
| 2     | 11.968    | 8085272  | 70.665  | 58.299  |
| Total |           | 11441679 | 100.000 | 100.000 |

**(S)-1-(2,2-diphenylvinyl)-7-methoxy-1,2-dihydro-3H-imidazo[1,5-a]indol-3-one (3f)**

Yield: 64% (25 mg); brown colour solid; TLC: (25% EtOAc in hexanes,  $R_f$ ): 0.2;  $[\alpha]_D^{20} +102.0$

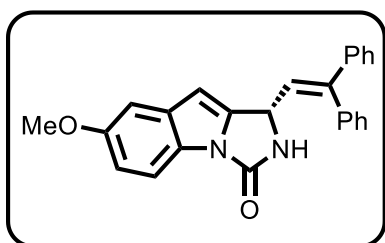

(c 0.1, CHCl<sub>3</sub>); IR (ATR):  $\nu(\text{cm}^{-1}) = 3683, 3459, 3019, 2925, 1735, 1585, 1214, 749$ ; <sup>1</sup>H NMR (500 MHz, CDCl<sub>3</sub>, 24 °C):  $\delta$ . 7.77 (d,  $J = 9.0$  Hz, 1H), 7.39-7.36 (m, 2H), 7.34-7.31 (m, 1H), 7.25-7.24 (m, 2H), 7.19-7.16 (m, 5H), 6.95 (s, 1H), 6.83 (d,  $J = 8.7$  Hz, 1H), 6.25 (s, 1H), 5.90 (d,  $J = 9.4$  Hz, 1H), 5.22 (d,  $J = 9.4$  Hz, 1H), 3.76 (s, 3H). <sup>13</sup>C{<sup>1</sup>H} NMR (100 MHz, CDCl<sub>3</sub>, 24 °C):  $\delta$  156.0, 152.8, 146.9, 141.2, 140.6, 138.3, 134.3, 129.6, 128.7, 128.3, 128.29, 128.21, 127.5, 125.5, 124.1, 113.1, 112.3, 103.7, 98.0, 55.7, 52.0. HRMS (ESI/Q-TOF)  $m/z$ :  $[M + H]^+$  Calcd for C<sub>25</sub>H<sub>21</sub>N<sub>2</sub>O<sub>2</sub> 381.1598; Found 381.1601.

The enantiomeric ratio (98:2) was determined by Daicel Chiralpak IB (35 °C), Hexane/IPA = 85/15, 1.0 mL/min,  $\lambda = 254$  nm,  $t_R$  (major) = 8.94 min,  $t_R$  (minor) = 11.59 min.

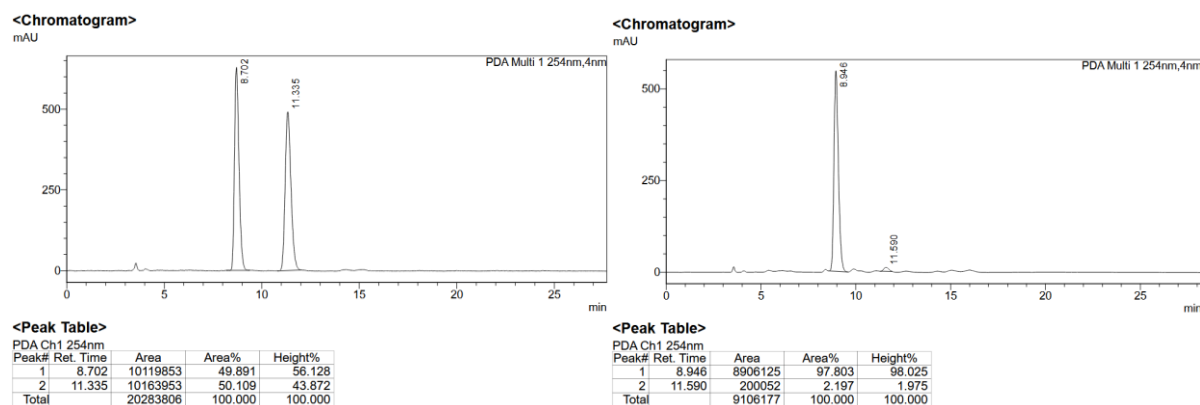

### (R)-1-(2,2-diphenylvinyl)-7-methoxy-1,2-dihydro-3H-imidazo[1,5-a]indol-3-one (3f)

Yield: 69% (18 mg); brown colour solid,  $[\alpha]_D^{20} -212.5$  (c 0.1,  $\text{CHCl}_3$ ).

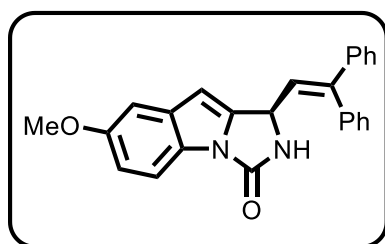

The enantiomeric ratio (12:88) was determined by Daicel Chiralpak IB (35 °C), Hexane/IPA = 85/15, 1.0 mL/min,  $\lambda = 254$  nm,  $t_R$  (minor) = 8.51 min,  $t_R$  (major) = 10.90 min.

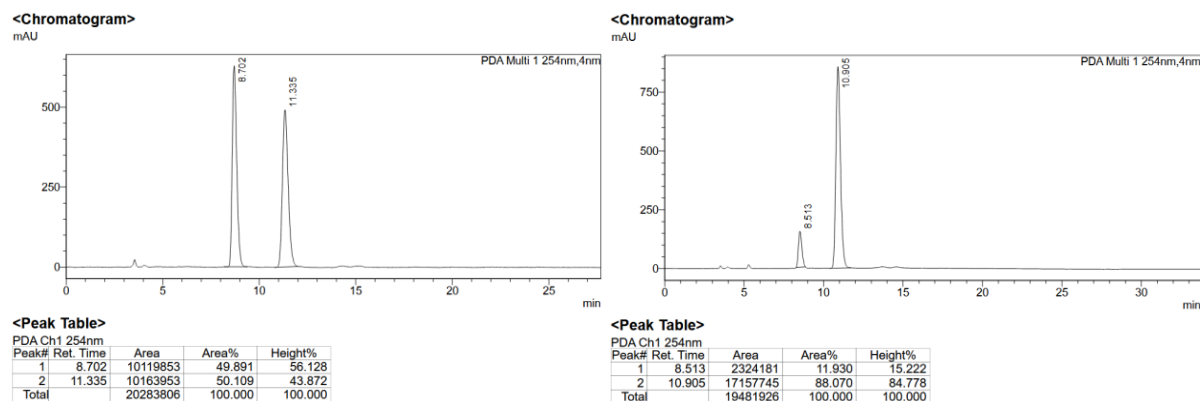

### (S)-1-(2,2-diphenylvinyl)-7-fluoro-1,2-dihydro-3H-imidazo[1,5-a]indol-3-one (3g)

Yield: 76% (30 mg); brown colour solid; TLC: (25% EtOAc in hexanes,  $R_f$ ): 0.4;  $[\alpha]_D^{20} +140.8$

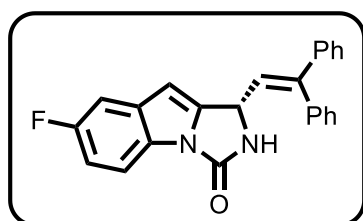

(c 0.1,  $\text{CHCl}_3$ ); IR (ATR):  $\nu(\text{cm}^{-1}) = 3682, 3456, 3249, 3059, 3021, 2926, 1735, 1587, 1475, 1215, 750$ ;  $^1\text{H NMR}$  (400 MHz,  $\text{CDCl}_3$ , 24 °C):  $\delta$  7.84-7.81 (m, 1H), 7.42-7.32 (m, 3H), 7.25-7.19 (m, 5H), 7.19-7.18 (m, 1H), 7.18-7.13 (m, 2H), 6.97-6.92 (m, 1H), 6.31 (s, 1H), 5.91 (d,  $J = 9.4$  Hz, 1H), 5.72 (s, 1H),

5.26 (d,  $J=9.4$  Hz, 1H).  $^{13}\text{C}\{^1\text{H}\}$  NMR (100 MHz,  $\text{CDCl}_3$ , 24 °C):  $\delta$  160.4, 158.1, 152.6, 147.3, 142.0, 140.5, 138.2, 134.2 (d,  $J=9.8$  Hz), 129.6, 128.8, 128.4, 128.3, 127.6, 127.0, 123.6, 113.3 (d,  $J=9.3$  Hz), 111.3 (d,  $J=26.0$  Hz), 106.4 (d,  $J=24.0$  Hz), 98.1 (d,  $J=3.6$  Hz), 52.0.  $^{19}\text{F}$  NMR (375 MHz,  $\text{CDCl}_3$ , 24 °C):  $\delta$  -120.12. HRMS (ESI/Q-TOF)  $m/z$ :  $[\text{M} + \text{H}]^+$  Calcd for  $\text{C}_{24}\text{H}_{18}\text{FN}_2\text{O}$  369.1398; Found 369.1399.

The enantiomeric ratio (97:3) was determined by Daicel Chiralpak IB (35 °C), Hexane/IPA = 85/15, 1.0 mL/min,  $\lambda = 254$  nm,  $t_R$  (major) = 6.93 min,  $t_R$  (minor) = 10.27 min.

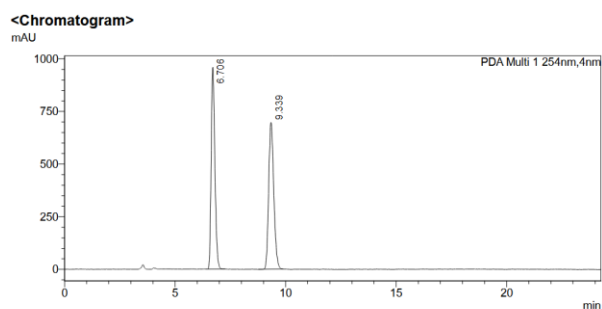

<Peak Table>  
PDA Ch1 254nm

| Peak# | Ret. Time | Area     | Area%   | Height% |
|-------|-----------|----------|---------|---------|
| 1     | 6.706     | 11168423 | 49.936  | 57.899  |
| 2     | 9.339     | 11197198 | 50.064  | 42.101  |
| Total |           | 22365621 | 100.000 | 100.000 |

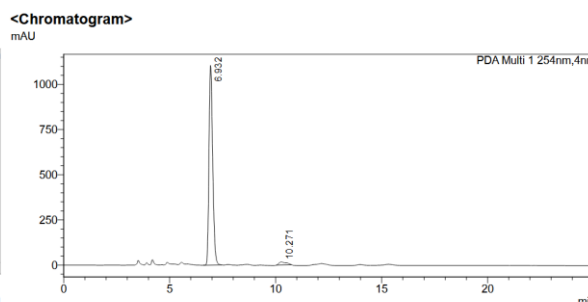

<Peak Table>  
PDA Ch1 254nm

| Peak# | Ret. Time | Area     | Area%   | Height% |
|-------|-----------|----------|---------|---------|
| 1     | 6.932     | 13416124 | 97.040  | 98.460  |
| 2     | 10.271    | 409288   | 2.960   | 1.540   |
| Total |           | 13825412 | 100.000 | 100.000 |

### (*R*)-1-(2,2-diphenylvinyl)-7-fluoro-1,2-dihydro-3H-imidazo[1,5-a]indol-3-one (3g)

Yield: 73% (19 mg); brown colour solid,  $[\alpha]_D^{20} -166.4$  (c 0.1,  $\text{CHCl}_3$ ).

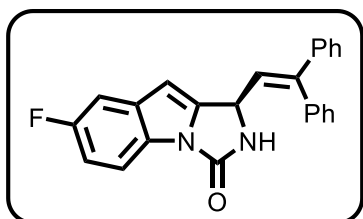

The enantiomeric ratio (15:85) was determined by Daicel Chiralpak IB (35 °C), Hexane/IPA = 85/15, 1.0 mL/min,  $\lambda = 254$  nm,  $t_R$  (minor) = 6.65 min,  $t_R$  (major) = 9.23 min.

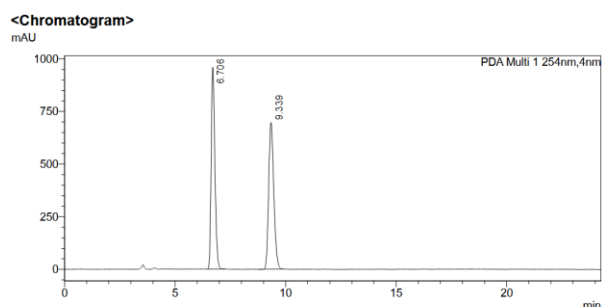

<Peak Table>  
PDA Ch1 254nm

| Peak# | Ret. Time | Area     | Area%   | Height% |
|-------|-----------|----------|---------|---------|
| 1     | 6.706     | 11168423 | 49.936  | 57.899  |
| 2     | 9.339     | 11197198 | 50.064  | 42.101  |
| Total |           | 22365621 | 100.000 | 100.000 |

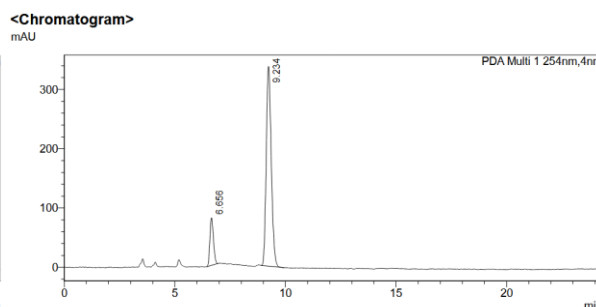

<Peak Table>  
PDA Ch1 254nm

| Peak# | Ret. Time | Area    | Area%   | Height% |
|-------|-----------|---------|---------|---------|
| 1     | 6.656     | 897415  | 14.439  | 19.294  |
| 2     | 9.234     | 5317872 | 85.561  | 80.706  |
| Total |           | 6215287 | 100.000 | 100.000 |

**(S)-7-bromo-1-(2,2-diphenylvinyl)-1,2-dihydro-3H-imidazo[1,5-a]indol-3-one (3h)**

Yield: 78% (30 mg); brown colour solid; TLC: (25% EtOAc in hexanes,  $R_f$ ): 0.4;  $[\alpha]_D^{20} +196.7$

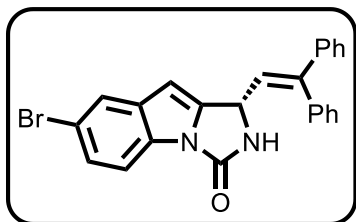

(c 0.1,  $\text{CHCl}_3$ ); IR (ATR):  $\nu(\text{cm}^{-1}) = 3671, 3450, 3049, 2828, 1730, 1166, 701$ ;  $^1\text{H NMR}$  (400 MHz,  $\text{CDCl}_3$ , 24 °C):  $\delta$  7.74 (d,  $J = 8.4$  Hz, 1H), 7.62 (d,  $J = 1.6$  Hz, 1H), 7.41-7.37 (m, 2H), 7.35-7.33 (m, 1H), 7.30-7.37 (m, 1H), 7.25-7.15 (m, 7H), 6.26 (s, 1H), 6.07 (s, 1H), 5.90 (d,  $J = 9.4$  Hz, 1H), 5.25 (d,  $J = 9.4$

Hz, 1H).  $^{13}\text{C}\{^1\text{H}\}$  NMR (100 MHz,  $\text{CDCl}_3$ , 24 °C):  $\delta$  152.5, 147.4, 141.5, 140.4, 138.1, 135.0, 129.6, 129.1, 128.8, 128.45, 128.42, 128.3, 127.6, 126.2, 123.6, 123.4, 115.9, 113.8, 97.5, 52.0. HRMS (ESI/Q-TOF)  $m/z$ :  $[\text{M} + \text{H}]^+$  Calcd for  $\text{C}_{24}\text{H}_{18}\text{BrN}_2\text{O}$  429.0597; Found 429.0606.

The enantiomeric ratio (96:4) was determined by Daicel Chiralpak IB (35 °C), Hexane/IPA = 85/15, 1.0 mL/min,  $\lambda = 254$  nm,  $t_R$  (major) = 7.61 min,  $t_R$  (minor) = 10.89 min.

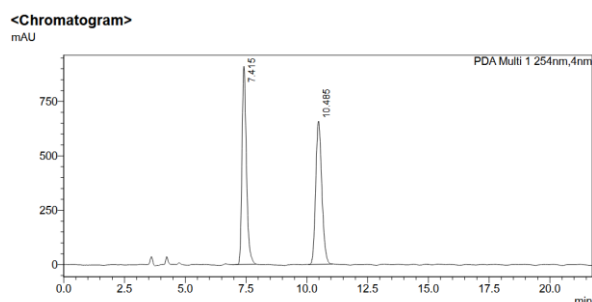

<Peak Table>  
PDA Ch1 254nm

| Peak# | Ret. Time | Area     | Area%   | Height% |
|-------|-----------|----------|---------|---------|
| 1     | 7.415     | 11594550 | 50.103  | 58.043  |
| 2     | 10.485    | 11546992 | 49.897  | 41.957  |
| Total |           | 23141543 | 100.000 | 100.000 |

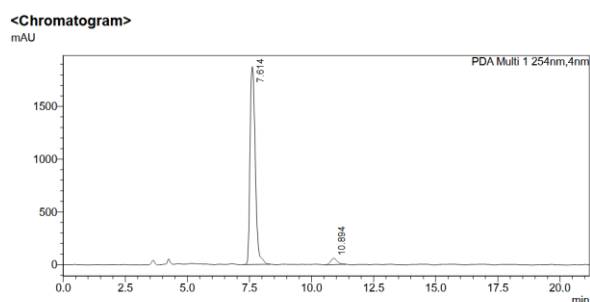

<Peak Table>  
PDA Ch1 254nm

| Peak# | Ret. Time | Area     | Area%   | Height% |
|-------|-----------|----------|---------|---------|
| 1     | 7.614     | 27578205 | 96.307  | 96.963  |
| 2     | 10.884    | 1057645  | 3.693   | 3.037   |
| Total |           | 28635850 | 100.000 | 100.000 |

**(R)-7-bromo-1-(2,2-diphenylvinyl)-1,2-dihydro-3H-imidazo[1,5-a]indol-3-one (3h)**

Yield: 80% (20 mg); brown colour solid,  $[\alpha]_D^{20} -177.3$  (c 0.1,  $\text{CHCl}_3$ ).

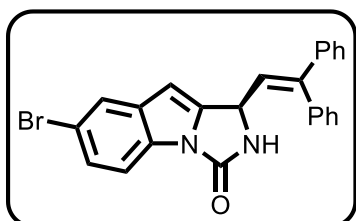

The enantiomeric ratio (11:89) was determined by Daicel Chiralpak IB (35 °C), Hexane/IPA = 85/15, 1.0 mL/min,  $\lambda = 254$  nm,  $t_R$  (minor) = 7.15 min,  $t_R$  (major) = 10.00 min.

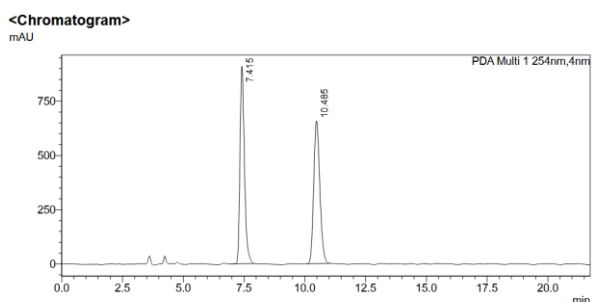

<Peak Table>  
PDA Ch1 254nm

| Peak# | Ret. Time | Area     | Area%   | Height% |
|-------|-----------|----------|---------|---------|
| 1     | 7.415     | 11594550 | 50.103  | 58.043  |
| 2     | 10.485    | 11546992 | 49.897  | 41.957  |
| Total |           | 23141543 | 100.000 | 100.000 |

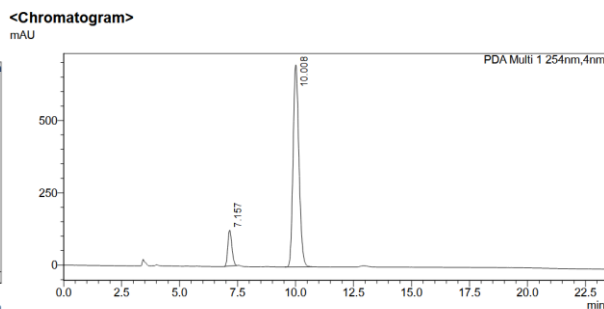

<Peak Table>  
PDA Ch1 254nm

| Peak# | Ret. Time | Area     | Area%   | Height% |
|-------|-----------|----------|---------|---------|
| 1     | 7.157     | 1510926  | 10.932  | 15.108  |
| 2     | 10.008    | 12310055 | 89.068  | 84.892  |
| Total |           | 13820982 | 100.000 | 100.000 |

### (S)-1-(2,2-diphenylvinyl)-7-iodo-1,2-dihydro-3H-imidazo[1,5-a]indol-3-one (3i)

Yield: 81% (30 mg); brown colour solid; TLC: (25% EtOAc in hexanes,  $R_f$ ): 0.4;  $[\alpha]_D^{20} +113.6$

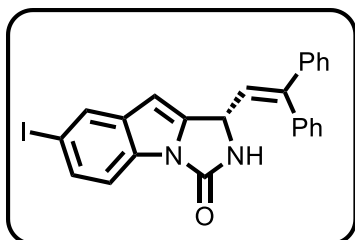

(c 0.1,  $\text{CHCl}_3$ ); IR (ATR):  $\nu(\text{cm}^{-1}) = 3684, 3455, 3019, 1739, 1445, 1215, 929$ ;  $^1\text{H NMR}$  (400 MHz,  $\text{DMSO}-d_6, 24^\circ\text{C}$ ):  $\delta$  8.77 (s, 1H), 7.99 (d,  $J = 1.4$  Hz, 1H), 7.65 (d,  $J = 8.4$  Hz, 1H), 7.55-7.50 (m, 3H), 7.47-7.42 (m, 1H), 7.37-7.29 (m, 5H), 7.24-7.22 (m, 2H), 6.5 (s, 1H), 6.07 (d,  $J = 9.6$  Hz, 1H), 5.15 (d,  $J = 9.6$

Hz, 1H).  $^{13}\text{C}\{^1\text{H}\}$  NMR (100 MHz,  $\text{DMSO}-d_6, 24^\circ\text{C}$ ):  $\delta$  152.2, 145.5, 142.1, 140.8, 138.4, 136.1, 131.2, 130.0, 129.9, 129.3, 129.2, 128.9, 128.57, 128.52, 127.6, 125.0, 114.2, 96.8, 86.6, 51.9. HRMS (ESI/Q-TOF)  $m/z$ :  $[\text{M} + \text{H}]^+$  Calcd for  $\text{C}_{24}\text{H}_{18}\text{IN}_2\text{O}$  477.0458; Found 477.0455.

The enantiomeric ratio (97:3) was determined by Daicel Chiralpak IB ( $35^\circ\text{C}$ ), Hexane/IPA = 85/15, 1.0 mL/min,  $\lambda = 254$  nm,  $t_R$  (major) = 7.78 min,  $t_R$  (minor) = 10.83 min.

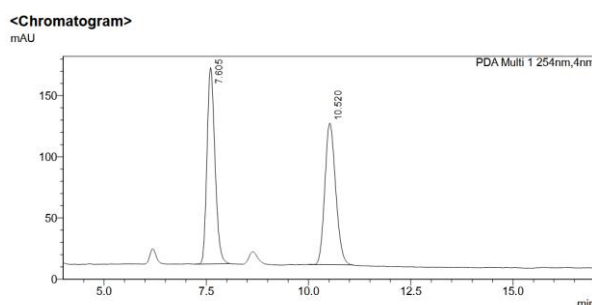

<Peak Table>  
PDA Ch1 254nm

| Peak# | Ret. Time | Area    | Area%   | Height% |
|-------|-----------|---------|---------|---------|
| 1     | 7.605     | 2169914 | 50.279  | 58.091  |
| 2     | 10.520    | 2145807 | 49.721  | 41.909  |
| Total |           | 4315721 | 100.000 | 100.000 |

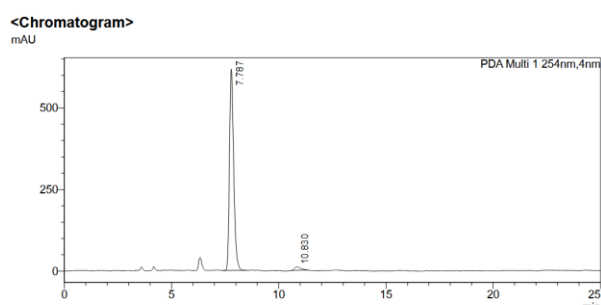

<Peak Table>  
PDA Ch1 254nm

| Peak# | Ret. Time | Area    | Area%   | Height% |
|-------|-----------|---------|---------|---------|
| 1     | 7.787     | 8436830 | 97.432  | 98.240  |
| 2     | 10.830    | 222375  | 2.568   | 1.760   |
| Total |           | 8659204 | 100.000 | 100.000 |

**(R)-1-(2,2-diphenylvinyl)-7-iodo-1,2-dihydro-3H-imidazo[1,5-a]indol-3-one (3i)**

Yield: 66% (16 mg); brown colour solid,  $[\alpha]_D^{20} -118.0$  (c 0.1,  $\text{CHCl}_3$ ).

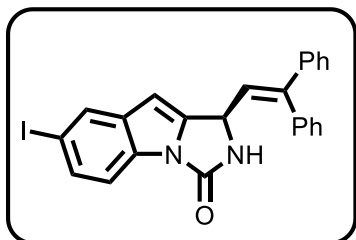

The enantiomeric ratio (86:14) was determined by Daicel Chiralpak IG (35 °C), Hexane/IPA = 85/15, 1.0 mL/min,  $\lambda = 254$  nm, tR (major) = 14.04 min, tR (minor) = 16.94 min.

<Chromatogram>  
mAU

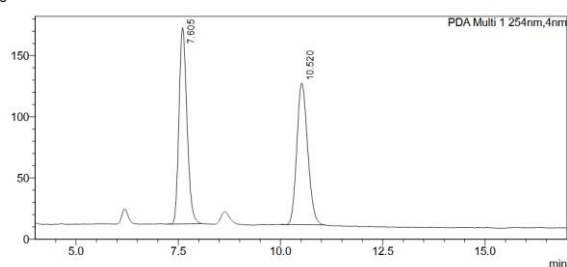

<Peak Table>

| Peak# | Ret. Time | Area    | Area%   | Height% |
|-------|-----------|---------|---------|---------|
| 1     | 7.605     | 2169914 | 50.279  | 58.091  |
| 2     | 10.520    | 2145807 | 49.721  | 41.909  |
| Total |           | 4315721 | 100.000 | 100.000 |

<Chromatogram>  
mAU

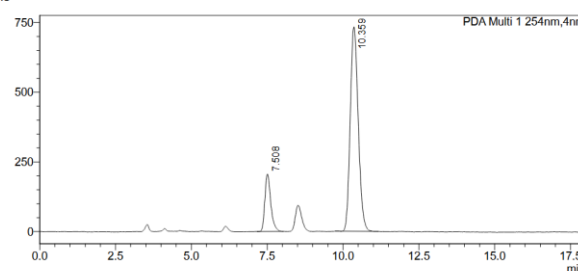

<Peak Table>

| Peak# | Ret. Time | Area     | Area%   | Height% |
|-------|-----------|----------|---------|---------|
| 1     | 7.508     | 2795327  | 17.230  | 21.960  |
| 2     | 10.359    | 13427915 | 82.770  | 78.040  |
| Total |           | 16223243 | 100.000 | 100.000 |

**(S)-6-chloro-1-(2,2-diphenylvinyl)-1,2-dihydro-3H-imidazo[1,5-a]indol-3-one (3j)**

Yield: 84% (33 mg); brown colour solid; TLC: (25% EtOAc in hexanes,  $R_f$ ): 0.4;  $[\alpha]_D^{20} +287.6$

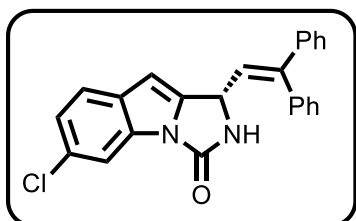

(c 0.1,  $\text{CHCl}_3$ ); IR (ATR):  $\nu(\text{cm}^{-1}) = 3682, 3454, 3244, 3020, 1736, 1459, 1215, 755$ ;  $^1\text{H}$  NMR (400 MHz,  $\text{DMSO}-d_6, 24$  °C):  $\delta$  8.79 (s, 1H), 7.79 (d,  $J = 1.9$  Hz, 1H), 7.60 (d,  $J = 8.4$  Hz, 1H), 7.53-7.49 (m, 2H), 7.46-7.42 (m, 1H), 7.37-7.35 (m, 2H), 7.32-7.28 (m, 3H), 7.24-7.20 (m, 3H), 6.55 (s, 1H), 6.07 (d,  $J = 9.5$

Hz, 1H), 5.14 (d,  $J = 9.5$  Hz, 1H).  $^{13}\text{C}\{^1\text{H}\}$  NMR (100 MHz,  $\text{DMSO}-d_6, 24$  °C):  $\delta$  156.9, 150.3, 146.7, 145.5, 143.1, 137.2, 135.1, 134.7, 133.9, 133.6, 133.3, 133.2, 132.4x3, 129.7, 127.6, 127.5, 116.4, 102.4, 56.8. HRMS (ESI/Q-TOF) m/z:  $[\text{M} + \text{H}]^+$  Calcd for  $\text{C}_{24}\text{H}_{18}\text{ClN}_2\text{O}$  385.1102; Found 385.1103.

The enantiomeric ratio (97:3) was determined by Daicel Chiralpak IB (35 °C), Hexane/IPA = 85/15, 1.0 mL/min,  $\lambda = 254$  nm, tR (major) = 6.48 min, tR (minor) = 9.90 min.

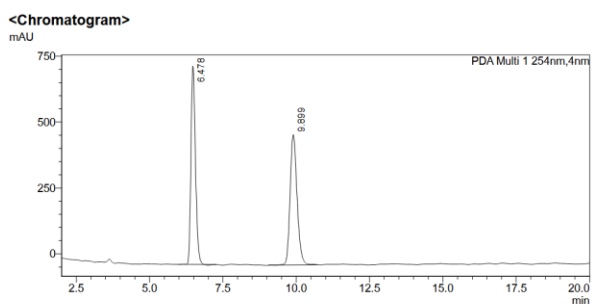

<Peak Table>

| Peak# | Ret. Time | Area     | Area%   | Height% |
|-------|-----------|----------|---------|---------|
| 1     | 6.478     | 8014475  | 49.471  | 60.341  |
| 2     | 9.899     | 8186018  | 50.529  | 39.659  |
| Total |           | 16200493 | 100.000 | 100.000 |

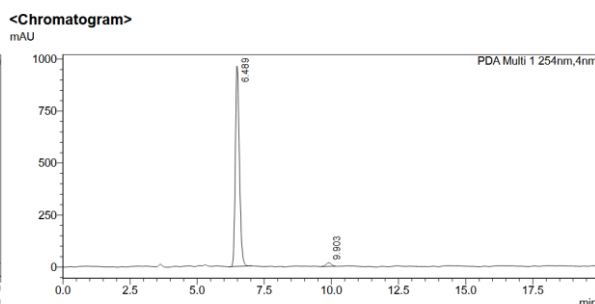

<Peak Table>

| Peak# | Ret. Time | Area     | Area%   | Height% |
|-------|-----------|----------|---------|---------|
| 1     | 6.489     | 10196227 | 97.630  | 98.245  |
| 2     | 9.903     | 247560   | 2.370   | 1.755   |
| Total |           | 10443787 | 100.000 | 100.000 |

### (R)-6-chloro-1-(2,2-diphenylvinyl)-1,2-dihydro-3H-imidazo[1,5-a]indol-3-one (3j)

Yield: 76% (20 mg); brown colour solid,  $[\alpha]_D^{20} -193.2$  (c 0.1,  $\text{CHCl}_3$ ).

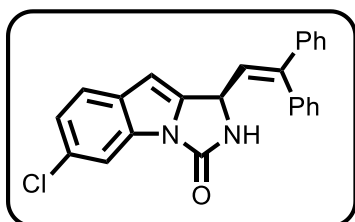

The enantiomeric ratio (11:89) was determined by Daicel Chiralpak IB (35 °C), Hexane/IPA = 85/15, 1.0 mL/min,  $\lambda = 254$  nm,  $t_R$  (minor) = 6.47 min,  $t_R$  (major) = 10.05 min.

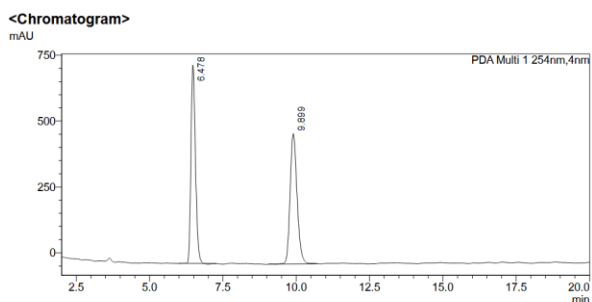

<Peak Table>

| Peak# | Ret. Time | Area     | Area%   | Height% |
|-------|-----------|----------|---------|---------|
| 1     | 6.478     | 8014475  | 49.471  | 60.341  |
| 2     | 9.899     | 8186018  | 50.529  | 39.659  |
| Total |           | 16200493 | 100.000 | 100.000 |

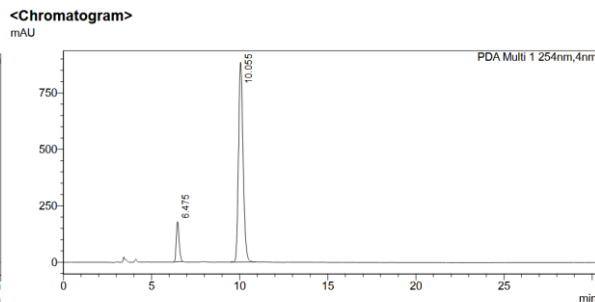

<Peak Table>

| Peak# | Ret. Time | Area     | Area%   | Height% |
|-------|-----------|----------|---------|---------|
| 1     | 6.475     | 2006999  | 11.141  | 16.778  |
| 2     | 10.055    | 16007210 | 88.859  | 83.222  |
| Total |           | 18014209 | 100.000 | 100.000 |

### (S)-6-bromo-1-(2,2-diphenylvinyl)-1,2-dihydro-3H-imidazo[1,5-a]indol-3-one (3k)

Yield: 66% (26 mg); brown colour solid; TLC: (25% EtOAc in hexanes,  $R_f$ ): 0.4;  $[\alpha]_D^{20} +274.4$

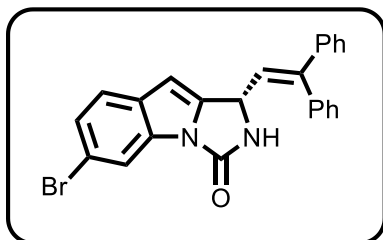

(c 0.1,  $\text{CHCl}_3$ ); IR (ATR):  $\nu(\text{cm}^{-1}) = 3683, 3456, 3019, 1737, 1464, 1215, 753$ ;  $^1\text{H}$  NMR (500 MHz,  $\text{DMSO}-d_6, 24$  °C):  $\delta$  8.8 (s, 1H), 7.93 (d,  $J = 1.6$  Hz, 1H), 7.58 (d,  $J = 7.5$  Hz, 1H), 7.54-7.51 (m, 2H), 7.47-7.43 (m, 1H), 7.38-7.30 (m, 6H), 7.25-7.23 (m, 2H), 6.58 (d,  $J = 0.9$  Hz, 1H), 6.09 (d,  $J = 9.5$  Hz, 1H), 5.14 (d,  $J = 9.5$  Hz, 1H).  $^{13}\text{C}$   $\{^1\text{H}\}$  NMR (125 MHz,  $\text{DMSO}-d_6, 24$  °C):  $\delta$  152.1, 145.5, 141.9, 140.7, 138.4, 132.7, 130.7, 130.0, 129.2, 128.9, 128.58, 128.54, 127.6, 125.4, 124.9,

123.3, 115.5, 114.5, 97.7, 52.1. HRMS (ESI/Q-TOF)  $m/z$ :  $[M + H]^+$  Calcd for  $C_{24}H_{18}BrN_2O$  429.0597; Found 429.0588.

The enantiomeric ratio (98:2) was determined by Daicel Chiralpak IB (35 °C), Hexane/IPA = 85/15, 1.0 mL/min,  $\lambda = 254$  nm,  $t_R$  (major) = 6.07 min,  $t_R$  (minor) = 9.13 min.

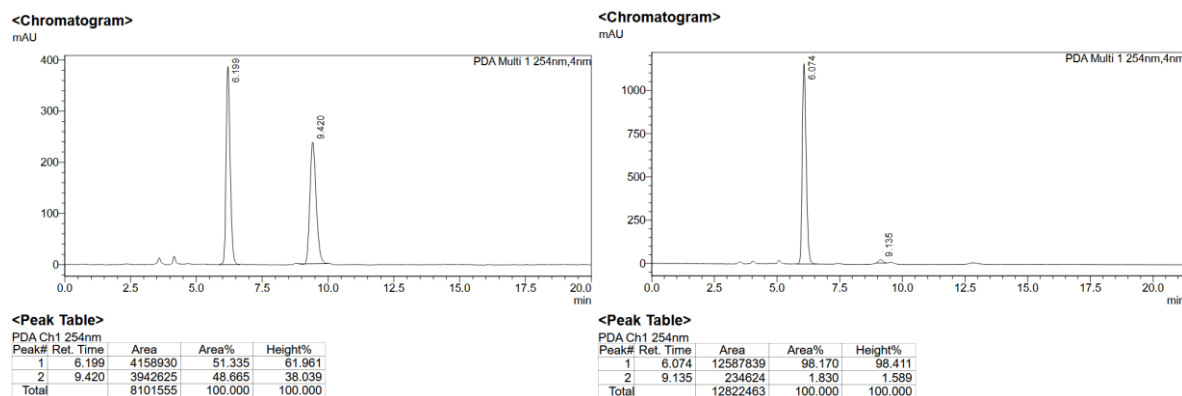

### (*R*)-6-bromo-1-(2,2-diphenylvinyl)-1,2-dihydro-3H-imidazo[1,5-a]indol-3-one (3k)

Yield: 71% (18 mg); brown colour solid,  $[\alpha]_D^{20} -183.2$  (c 0.1,  $CHCl_3$ ).

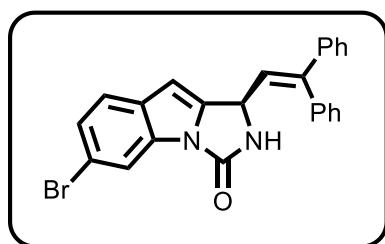

The enantiomeric ratio (16:84) was determined by Daicel Chiralpak IB (35 °C), Hexane/IPA = 85/15, 1.0 mL/min,  $\lambda = 254$  nm,  $t_R$  (minor) = 6.08 min,  $t_R$  (major) = 9.14 min.

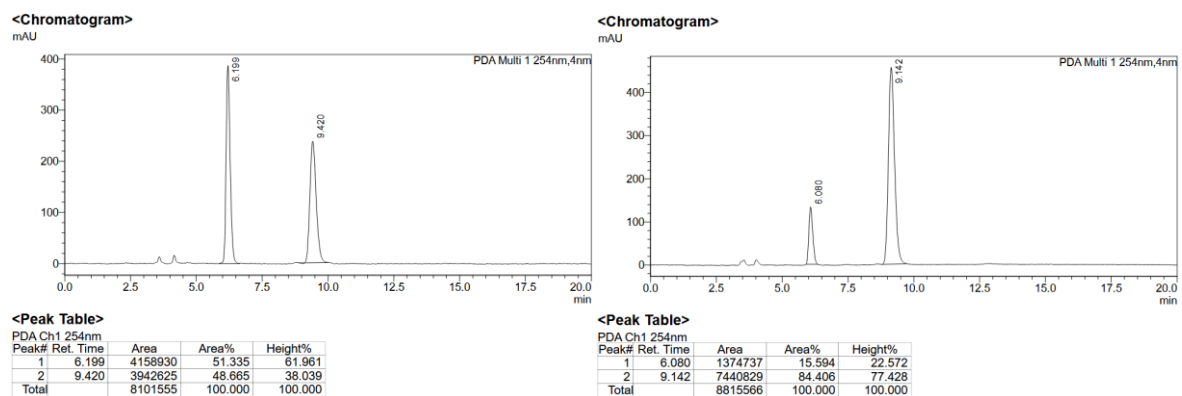

**Methyl (S)-1-(2,2-diphenylvinyl)-3-oxo-2,3-dihydro-1H-imidazo[1,5-a]indole-7-carboxylate (3l)**

Yield: 79% (30 mg); brown colour solid; TLC: (30% EtOAc in hexanes,  $R_f$ ): 0.3;  $[\alpha]_D^{20} +208.0$

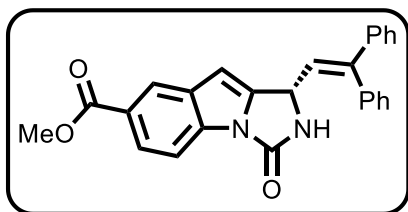

(c 0.1,  $\text{CHCl}_3$ ); IR (ATR):  $\nu(\text{cm}^{-1}) = 3683, 3457, 3019, 1747, 1713, 1438, 1214, 744$ ;  $^1\text{H NMR}$  (500 MHz,  $\text{DMSO-}d_6$ , 24 °C):  $\delta$  8.86 (s, 1H), 8.29 (s, 1H), 7.92-7.87 (m, 2H), 7.54-7.51 (m, 2H), 7.47-7.44 (m, 1H), 7.38-7.37 (m, 2H), 7.34-7.29 (m, 3H), 7.25-7.23 (m, 2H), 6.70 (s, 1H), 6.11 (d,

$J = 9.5$  Hz, 1H), 5.18 (d,  $J = 9.5$  Hz, 1H), 3.86 (s, 3H).  $^{13}\text{C}\{^1\text{H}\}$  NMR (125 MHz,  $\text{DMSO-}d_6$ , 24 °C):  $\delta$  167.1, 152.1, 145.6, 142.6, 140.7, 138.3, 133.5, 132.6, 130.0, 129.2, 128.9, 128.58, 128.54, 127.7, 124.9, 124.0, 123.9, 123.6, 112.0, 98.4, 52.4, 52.1. HRMS (ESI/Q-TOF)  $m/z$ :  $[\text{M} + \text{H}]^+$  Calcd for  $\text{C}_{26}\text{H}_{21}\text{N}_2\text{O}_3$  409.1547; Found 409.1550.

The enantiomeric ratio (97:3) was determined by Daicel Chiralpak IB (35 °C), Hexane/IPA = 85/15, 1.0 mL/min,  $\lambda = 254$  nm,  $t_R$  (major) = 9.88 min,  $t_R$  (minor) = 13.10 min.

<Chromatogram>

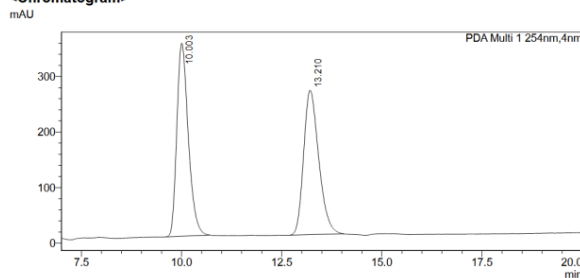

<Peak Table>

| Peak# | Ret. Time | Area     | Area%   | Height% |
|-------|-----------|----------|---------|---------|
| 1     | 10.003    | 6914653  | 50.285  | 57.227  |
| 2     | 13.210    | 6836225  | 49.715  | 42.773  |
| Total |           | 13750878 | 100.000 | 100.000 |

<Chromatogram>

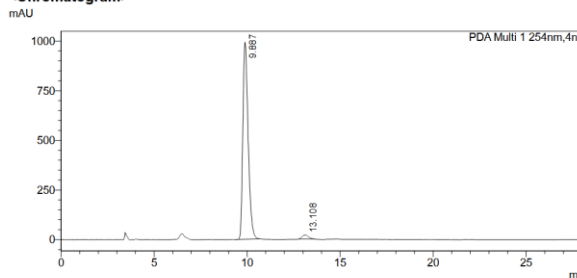

<Peak Table>

| Peak# | Ret. Time | Area     | Area%   | Height% |
|-------|-----------|----------|---------|---------|
| 1     | 9.887     | 19686199 | 97.502  | 97.953  |
| 2     | 13.108    | 504300   | 2.498   | 2.047   |
| Total |           | 20190499 | 100.000 | 100.000 |

**Methyl (R)-1-(2,2-diphenylvinyl)-3-oxo-2,3-dihydro-1H-imidazo[1,5-a]indole-7-carboxylate (3l)**

Yield: 75% (19 mg); brown colour solid,  $[\alpha]_D^{20} -147.2$  (c 0.1,  $\text{CHCl}_3$ ).

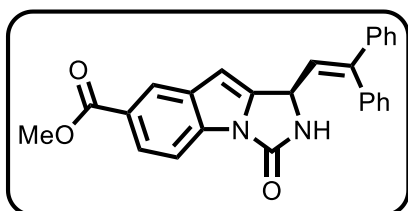

The enantiomeric ratio (14:86) was determined by Daicel Chiralpak IB (35 °C), Hexane/IPA = 85/15, 1.0 mL/min,  $\lambda = 254$  nm,  $t_R$  (minor) = 9.61 min,  $t_R$  (major) = 12.61 min.

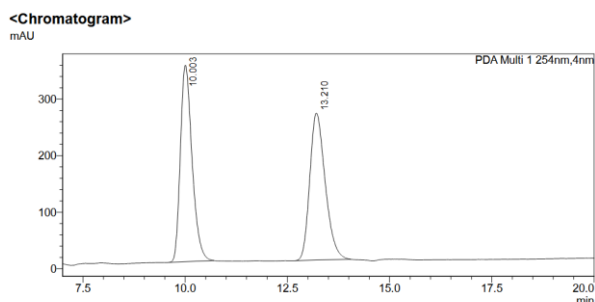

<Peak Table>  
PDA Ch1 254nm

| Peak# | Ret. Time | Area     | Area%   | Height% |
|-------|-----------|----------|---------|---------|
| 1     | 10.003    | 6914653  | 50.285  | 57.227  |
| 2     | 13.210    | 6836225  | 49.715  | 42.773  |
| Total |           | 13750878 | 100.000 | 100.000 |

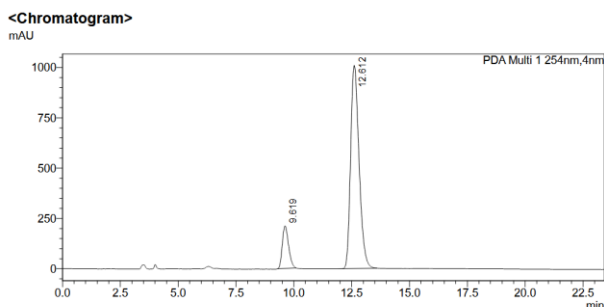

<Peak Table>  
PDA Ch1 254nm

| Peak# | Ret. Time | Area     | Area%   | Height% |
|-------|-----------|----------|---------|---------|
| 1     | 9.619     | 4004706  | 13.507  | 17.332  |
| 2     | 12.612    | 25644957 | 86.493  | 82.668  |
| Total |           | 29649663 | 100.000 | 100.000 |

### Allyl (*S*)-1-(2,2-diphenylvinyl)-3-oxo-2,3-dihydro-1H-imidazo[1,5-a]indole-7-carboxylate (**3m**)

Yield: 73% (28 mg); pale brown colour solid; TLC: (30% EtOAc in hexanes,  $R_f$ ): 0.3;  $[\alpha]_D^{20}$

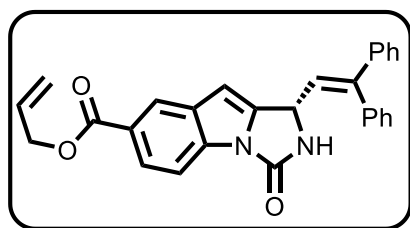

+208.0 (c 0.1, CHCl<sub>3</sub>); IR (ATR):  $\nu(\text{cm}^{-1}) = 3683, 3457, 3019, 1751, 1710, 1523, 1422, 1214, 745$ ; <sup>1</sup>H NMR (500 MHz, CDCl<sub>3</sub>, 24 °C):  $\delta$  8.29 (s, 1H), 7.97-7.92 (m, 2H), 7.42-7.39 (m, 2H), 7.36-7.33 (m, 1H), 7.27-7.25 (m, 2H), 7.23-7.21 (m, 3H), 7.19-7.17 (m, 2H), 6.42 (s, 1H), 6.04-

5.96 (m, 1H), 5.95-5.93 (m, 2H), 5.38-5.34 (m, 1H), 5.30 (d,  $J = 9.5$  Hz, 1H), 5.24-5.21 (m, 1H), 4.79-4.77 (m, 2H). <sup>13</sup>C {<sup>1</sup>H} NMR (100 MHz, CDCl<sub>3</sub>, 24 °C):  $\delta$  166.7, 152.2, 147.5, 141.3, 140.4, 138.1, 133.1, 133.0, 132.4, 129.6, 128.8, 128.48, 128.42, 128.3, 127.5, 124.75, 124.72, 123.6, 123.4, 118.1, 112.2, 98.9, 65.5, 52.1. HRMS (ESI/Q-TOF)  $m/z$ :  $[M + H]^+$  Calcd for C<sub>28</sub>H<sub>23</sub>N<sub>2</sub>O<sub>3</sub> 435.1703; Found 435.1712.

The enantiomeric ratio (98:2) was determined by Daicel Chiralpak IB (35 °C), Hexane/IPA = 85/15, 1.0 mL/min,  $\lambda = 254$  nm,  $t_R$  (major) = 8.64 min,  $t_R$  (minor) = 11.45 min.

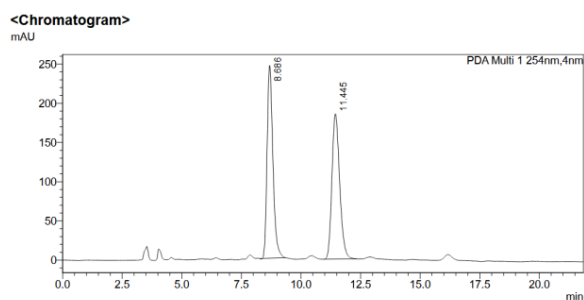

<Peak Table>  
PDA Ch1 254nm

| Peak# | Ret. Time | Area    | Area%   | Height% |
|-------|-----------|---------|---------|---------|
| 1     | 8.686     | 4172624 | 49.933  | 57.031  |
| 2     | 11.445    | 4183877 | 50.067  | 42.969  |
| Total |           | 8356502 | 100.000 | 100.000 |

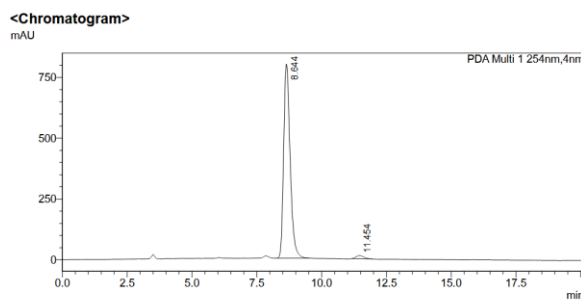

<Peak Table>  
PDA Ch1 254nm

| Peak# | Ret. Time | Area     | Area%   | Height% |
|-------|-----------|----------|---------|---------|
| 1     | 8.644     | 13904196 | 98.053  | 98.396  |
| 2     | 11.454    | 276077   | 1.947   | 1.604   |
| Total |           | 14180273 | 100.000 | 100.000 |

**Allyl (R)-1-(2,2-diphenylvinyl)-3-oxo-2,3-dihydro-1H-imidazo[1,5-a]indole-7-carboxylate (3m)**

Yield: 76% (19 mg); pale brown colour solid,  $[\alpha]_D^{20} -152.8$  (c 0.1, CHCl<sub>3</sub>).

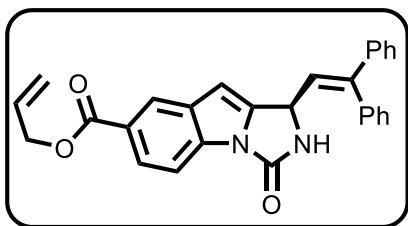

The enantiomeric ratio (14:86) was determined by Daicel Chiralpak IB (35 °C), Hexane/IPA = 85/15, 1.0 mL/min,  $\lambda = 254$  nm, tR (minor) = 8.67 min, tR (major) = 11.43 min.

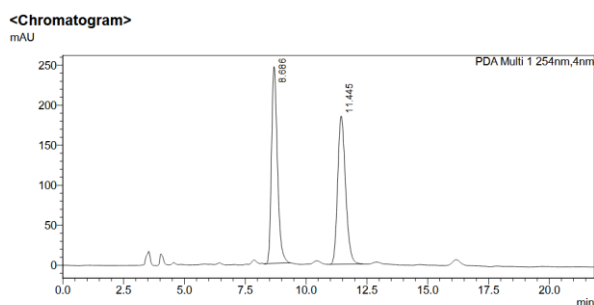

<Peak Table>  
PDA Ch1 254nm

| Peak# | Ret. Time | Area    | Area%   | Height% |
|-------|-----------|---------|---------|---------|
| 1     | 8.686     | 4172624 | 49.933  | 57.031  |
| 2     | 11.445    | 4183877 | 50.067  | 42.969  |
| Total |           | 8356502 | 100.000 | 100.000 |

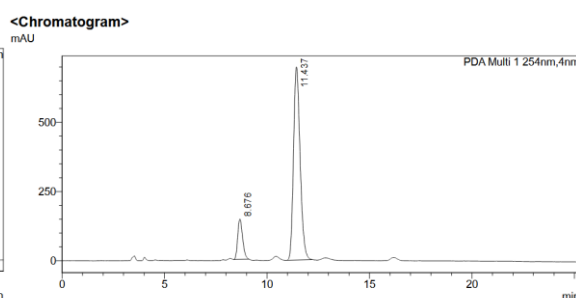

<Peak Table>  
PDA Ch1 254nm

| Peak# | Ret. Time | Area     | Area%   | Height% |
|-------|-----------|----------|---------|---------|
| 1     | 8.676     | 2422998  | 13.463  | 17.263  |
| 2     | 11.437    | 15574165 | 86.537  | 82.737  |
| Total |           | 17997162 | 100.000 | 100.000 |

**But-2-yn-1-yl (S)-1-(2,2-diphenylvinyl)-3-oxo-2,3-dihydro-1H-imidazo[1,5-a]indole-7-carboxylate (3n)**

Yield: 75% (29 mg); pale brown colour solid; TLC: (30% EtOAc in hexanes,  $R_f$ ): 0.3;  $[\alpha]_D^{20}$

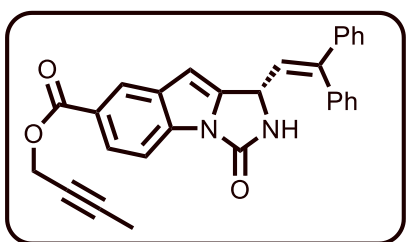

+180.0 (c 0.1, CHCl<sub>3</sub>); IR (ATR):  $\nu(\text{cm}^{-1}) = 3019, 1743, 1737, 1409, 1294, 1250, 1216, 1147, 761$ ; <sup>1</sup>H NMR (500 MHz, CDCl<sub>3</sub>, 24 °C):  $\delta$  8.39 (s, 1H), 8.07-8.02 (m, 2H), 7.52-7.49 (m, 2H), 7.47-7.44 (m, 1H), 7.36-7.31 (m, 5H), 7.29-7.27 (m, 2H), 6.52 (s, 1H), 6.04 (d,  $J = 9.4$  Hz, 1H), 5.91 (s,

1H), 5.40 (d,  $J = 9.4$  Hz, 1H), 4.94 (q,  $J = 2.3$  Hz, 2H), 1.91 (t,  $J = 2.3$  Hz, 3H). <sup>13</sup>C {<sup>1</sup>H} NMR (100 MHz, CDCl<sub>3</sub>, 24 °C):  $\delta$  166.4, 152.1, 147.5, 141.3, 140.3, 138.1, 133.17, 133.11, 129.6, 128.8, 128.48, 128.42, 128.3, 127.5, 124.8, 124.2, 123.8, 123.4, 112.2, 98.9, 83.2, 73.4, 53.2, 52.1, 3.7. HRMS (ESI/Q-TOF) m/z:  $[M + \text{Na}]^+$  Calcd for C<sub>29</sub>H<sub>22</sub>N<sub>2</sub>O<sub>3</sub>Na 469.1523; Found 469.1541.

The enantiomeric ratio (98:2) was determined by Daicel Chiralpak IB (35 °C), Hexane/IPA = 85/15, 1.0 mL/min,  $\lambda = 254$  nm, tR (major) = 10.84 min, tR (minor) = 14.45 min.

<Chromatogram>

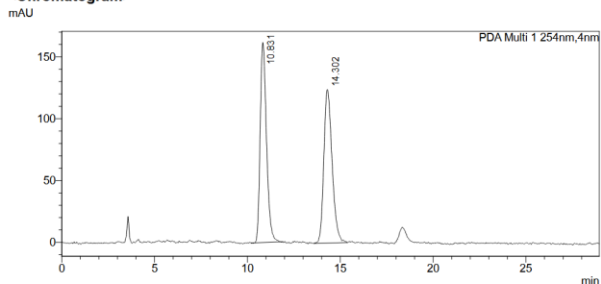

<Peak Table>

| Peak# | Ret. Time | Area    | Area%   | Height% |
|-------|-----------|---------|---------|---------|
| 1     | 10.831    | 3826044 | 49.883  | 56.525  |
| 2     | 14.302    | 3843950 | 50.117  | 43.475  |
| Total |           | 7669994 | 100.000 | 100.000 |

<Chromatogram>

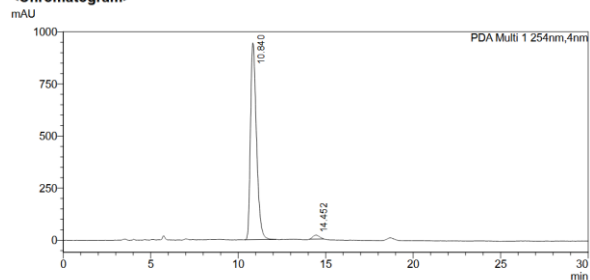

<Peak Table>

| Peak# | Ret. Time | Area     | Area%   | Height% |
|-------|-----------|----------|---------|---------|
| 1     | 10.840    | 22586829 | 97.827  | 98.029  |
| 2     | 14.452    | 501802   | 2.173   | 1.971   |
| Total |           | 23098631 | 100.000 | 100.000 |

**But-2-yn-1-yl (R)-1-(2,2-diphenylvinyl)-3-oxo-2,3-dihydro-1H-imidazo[1,5-a]indole-7-carboxylate (3n)**

Yield: 76% (19 mg); pale brown colour solid,  $[\alpha]_D^{20} -35.5$  (c 0.1, CHCl<sub>3</sub>).

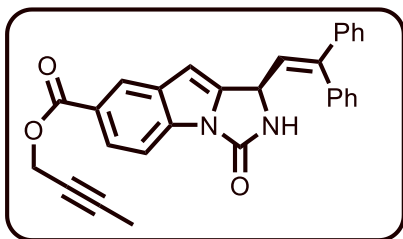

The enantiomeric ratio (15:85) was determined by Daicel Chiralpak IB (35 °C), Hexane/IPA = 85/15, 1.0 mL/min,  $\lambda = 254$  nm, tR (minor) = 10.88 min, tR (major) = 14.32 min.

<Chromatogram>

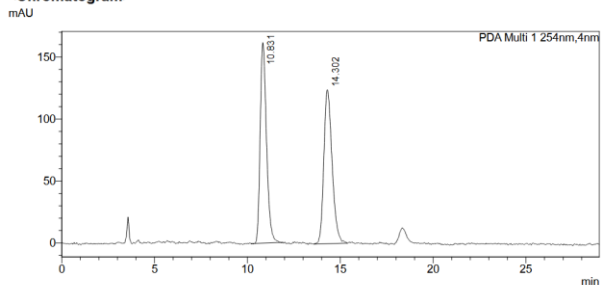

<Peak Table>

| Peak# | Ret. Time | Area    | Area%   | Height% |
|-------|-----------|---------|---------|---------|
| 1     | 10.831    | 3826044 | 49.883  | 56.525  |
| 2     | 14.302    | 3843950 | 50.117  | 43.475  |
| Total |           | 7669994 | 100.000 | 100.000 |

<Chromatogram>

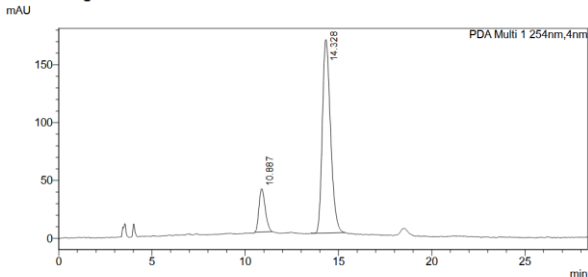

<Peak Table>

| Peak# | Ret. Time | Area    | Area%   | Height% |
|-------|-----------|---------|---------|---------|
| 1     | 10.887    | 874674  | 14.580  | 18.329  |
| 2     | 14.328    | 5124337 | 85.420  | 81.671  |
| Total |           | 5999010 | 100.000 | 100.000 |

### (S)-1-(2,2-di-*p*-tolylvinyl)-1,2-dihydro-3H-imidazo[1,5-*a*]indol-3-one (3o)

Yield: 76% (33 mg); brown colour solid; TLC: (25% EtOAc in hexanes,  $R_f$ ): 0.3;  $[\alpha]_D^{20} +225.3$

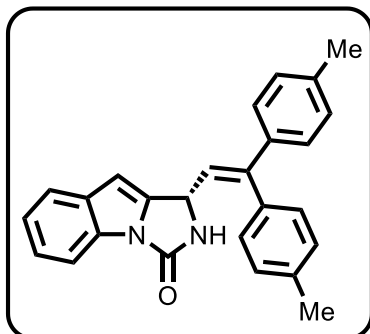

(c 0.1,  $\text{CHCl}_3$ ); IR (ATR):  $\nu(\text{cm}^{-1}) = 3683, 3459, 3019, 2925, 1739, 1214, 929, 743$ ;  $^1\text{H NMR}$  (500 MHz,  $\text{CDCl}_3$ , 24 °C):  $\delta$  7.90 (d,  $J = 7.8$  Hz, 1H), 7.49 (d,  $J = 7.8$  Hz, 1H), 7.22-7.12 (m, 6H), 7.06 (d,  $J = 7.6$  Hz, 2H), 7.00 (d,  $J = 7.6$  Hz, 2H), 6.32 (s, 1H), 5.87 (s, 1H), 5.83 (d,  $J = 9.4$  Hz, 1H), 5.26 (d,  $J = 9.4$  Hz, 1H), 2.32 (s, 3H), 2.24 (s, 3H).  $^{13}\text{C}\{^1\text{H}\}$  NMR (125 MHz,  $\text{CDCl}_3$ , 24 °C):  $\delta$  152.9, 146.9, 140.6, 138.2, 138.0x2, 135.4,

133.5, 130.5, 129.6, 129.4, 129.0, 127.5, 123.2, 122.9, 122.6, 120.9, 112.6, 98.1, 52.1, 21.2, 21.1. HRMS (ESI/Q-TOF)  $m/z$ :  $[\text{M} + \text{H}]^+$  Calcd for  $\text{C}_{26}\text{H}_{23}\text{N}_2\text{O}$  379.1805; Found 379.1807.

The enantiomeric ratio (99:1) was determined by Daicel Chiralpak IB (35 °C), Hexane/IPA = 85/15, 1.0 mL/min,  $\lambda = 254$  nm,  $t_R$  (major) = 5.33 min,  $t_R$  (minor) = 5.73 min.

<Chromatogram>  
mAU

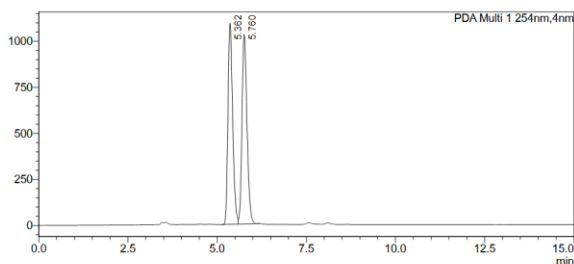

<Peak Table>

| Peak# | Ret. Time | Area     | Area%   | Height% |
|-------|-----------|----------|---------|---------|
| 1     | 5.362     | 9979206  | 49.751  | 51.473  |
| 2     | 5.760     | 10078967 | 50.249  | 48.527  |
| Total |           | 20058174 | 100.000 | 100.000 |

<Chromatogram>  
mAU

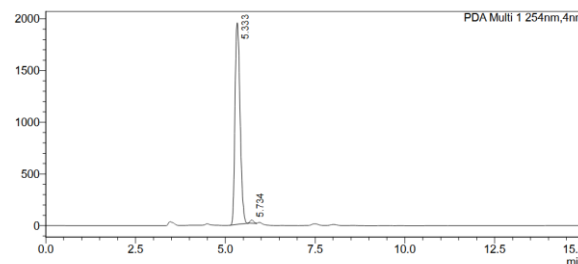

<Peak Table>

| Peak# | Ret. Time | Area     | Area%   | Height% |
|-------|-----------|----------|---------|---------|
| 1     | 5.333     | 19219213 | 98.916  | 98.463  |
| 2     | 5.734     | 210562   | 1.084   | 1.537   |
| Total |           | 19429775 | 100.000 | 100.000 |

### (R)-1-(2,2-di-*p*-tolylvinyl)-1,2-dihydro-3H-imidazo[1,5-*a*]indol-3-one (3o)

Yield: 23% (75 mg); brown colour solid,  $[\alpha]_D^{20} -155.6$  (c 0.1,  $\text{CHCl}_3$ ).

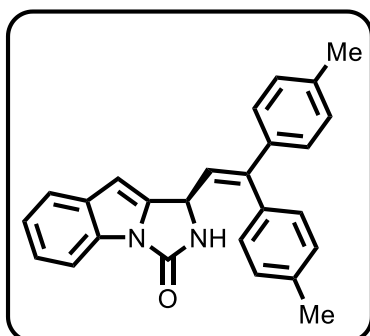

The enantiomeric ratio (9:91) was determined by Daicel Chiralpak IB (35 °C), Hexane/IPA = 85/15, 1.0 mL/min,  $\lambda = 254$  nm,  $t_R$  (minor) = 5.53 min,  $t_R$  (major) = 5.75 min.

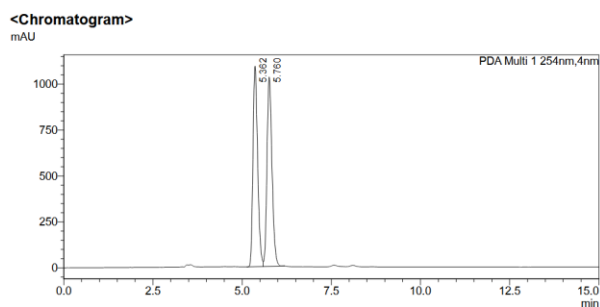

<Peak Table>

| Peak# | Ret. Time | Area     | Area%   | Height% |
|-------|-----------|----------|---------|---------|
| 1     | 5.362     | 9979206  | 49.751  | 51.473  |
| 2     | 5.760     | 10078967 | 50.249  | 48.527  |
| Total |           | 20058174 | 100.000 | 100.000 |

PDA Ch1 254nm

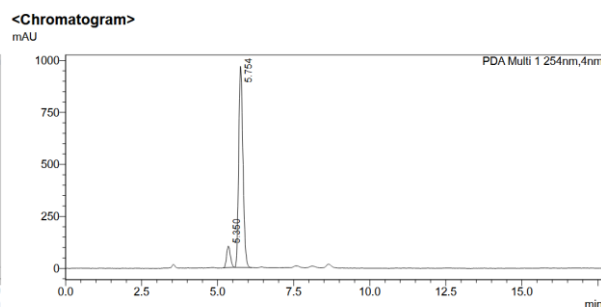

<Peak Table>

| Peak# | Ret. Time | Area     | Area%   | Height% |
|-------|-----------|----------|---------|---------|
| 1     | 5.350     | 890717   | 8.580   | 9.634   |
| 2     | 5.754     | 9490988  | 91.420  | 90.366  |
| Total |           | 10381705 | 100.000 | 100.000 |

PDA Ch1 254nm

### (S)-1-(2,2-di-*m*-tolylvinyl)-1,2-dihydro-3H-imidazo[1,5-a]indol-3-one (3p)

Yield: 74% (32 mg); brown colour solid; TLC: (25% EtOAc in hexanes,  $R_f$ ): 0.4;  $[\alpha]_D^{20} +53.2$

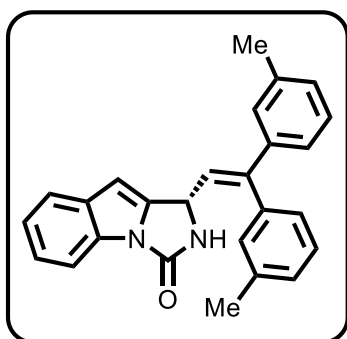

(c 0.1,  $\text{CHCl}_3$ ); IR (ATR):  $\nu(\text{cm}^{-1}) = 3680, 3455, 3258, 2923, 2855, 1733, 1451, 1215, 1198, 786$ ;  $^1\text{H NMR}$  (400 MHz,  $\text{CDCl}_3$ , 24 °C):  $\delta$  7.90 (d,  $J = 7.6$  Hz, 1H), 7.49 (d,  $J = 7.5$  Hz, 1H), 7.28-7.24 (m, 1H), 7.21-7.12 (m, 3H), 7.10-7.05 (m, 3H), 7.01-7.00 (m, 2H), 6.95-6.93 (m, 1H), 6.32 (s, 1H), 6.14 (br, 1H), 5.87 (d,  $J = 9.4$  Hz, 1H), 5.24 (d,  $J = 9.4$  Hz, 1H), 2.32 (s, 3H), 2.20 (s, 3H).  $^{13}\text{C}\{^1\text{H}\}$  NMR (100 MHz,  $\text{CDCl}_3$ , 24 °C):  $\delta$  153.0, 147.2,

140.7, 140.5, 138.4, 138.3, 137.9, 133.5, 130.5, 130.2, 129.0, 128.9, 128.5, 128.2, 128.1, 126.7, 124.9, 123.8, 123.2, 122.6, 121.0, 112.6, 98.1, 52.1, 21.5, 21.4. HRMS (ESI/Q-TOF)  $m/z$ :  $[\text{M} + \text{H}]^+$  Calcd for  $\text{C}_{26}\text{H}_{23}\text{N}_2\text{O}$  379.1805; Found 379.1812.

The enantiomeric ratio (96:4) was determined by Daicel Chiralpak IG (35 °C), Hexane/IPA = 50/50, 1.0 mL/min,  $\lambda = 254$  nm,  $t_R$  (major) = 13.34 min,  $t_R$  (minor) = 5.49 min.

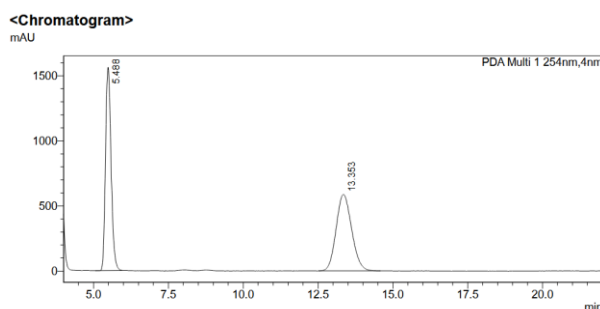

<Peak Table>

| Peak# | Ret. Time | Area     | Area%   | Height% |
|-------|-----------|----------|---------|---------|
| 1     | 5.488     | 20300574 | 48.983  | 72.652  |
| 2     | 13.353    | 21143743 | 51.017  | 27.348  |
| Total |           | 41444317 | 100.000 | 100.000 |

PDA Ch1 254nm

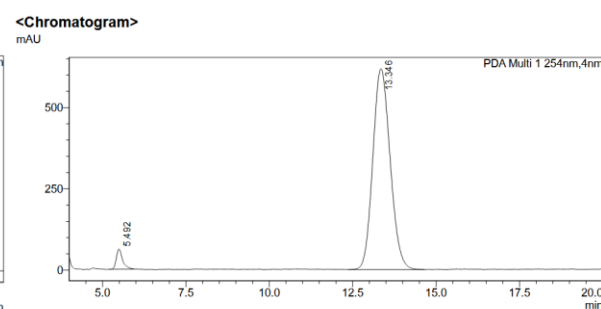

<Peak Table>

| Peak# | Ret. Time | Area     | Area%   | Height% |
|-------|-----------|----------|---------|---------|
| 1     | 5.492     | 816007   | 3.522   | 9.149   |
| 2     | 13.346    | 22350949 | 96.478  | 90.851  |
| Total |           | 23166956 | 100.000 | 100.000 |

PDA Ch1 254nm

**(R)-1-(2,2-di-*m*-tolylvinyl)-1,2-dihydro-3H-imidazo[1,5-*a*]indol-3-one (3p)**

Yield: 46% (14 mg); brown colour solid,  $[\alpha]_D^{20} -192.0$  (c 0.1, CHCl<sub>3</sub>).

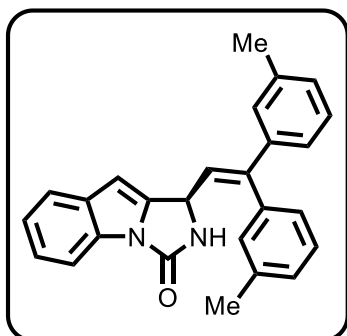

The enantiomeric ratio (14:86) was determined by Daicel Chiralpak IG (35 °C), Hexane/IPA = 50/50, 1.0 mL/min,  $\lambda = 254$  nm, tR (minor) = 13.42 min, tR (major) = 5.50 min.

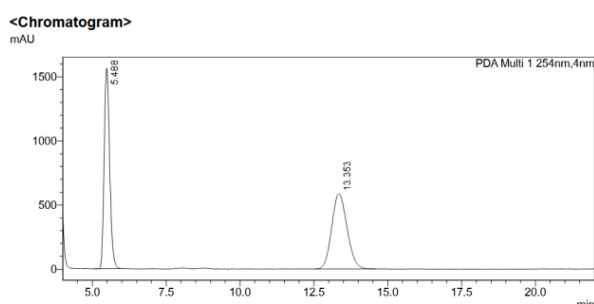

<Peak Table>  
PDA Ch1 254nm

| Peak# | Ret. Time | Area     | Area%   | Height% |
|-------|-----------|----------|---------|---------|
| 1     | 5.488     | 20300574 | 48.983  | 72.652  |
| 2     | 13.353    | 21143743 | 51.017  | 27.348  |
| Total |           | 41444317 | 100.000 | 100.000 |

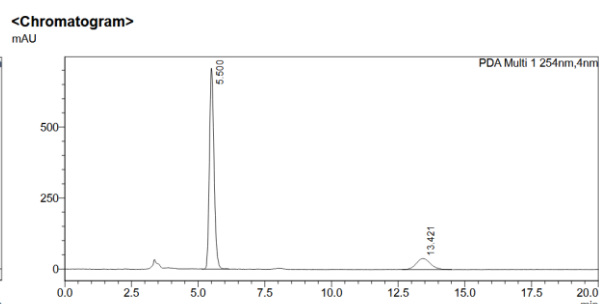

<Peak Table>  
PDA Ch1 254nm

| Peak# | Ret. Time | Area    | Area%   | Height% |
|-------|-----------|---------|---------|---------|
| 1     | 5.500     | 8512452 | 85.805  | 94.804  |
| 2     | 13.421    | 1408250 | 14.195  | 5.196   |
| Total |           | 9920702 | 100.000 | 100.000 |

**(S)-1-(2,2-di-*o*-tolylvinyl)-1,2-dihydro-3H-imidazo[1,5-*a*]indol-3-one (3q)**

Yield: 82% (36 mg); brown colour solid; TLC: (25% EtOAc in hexanes, *R*<sub>f</sub>): 0.4;  $[\alpha]_D^{20} +89.3$

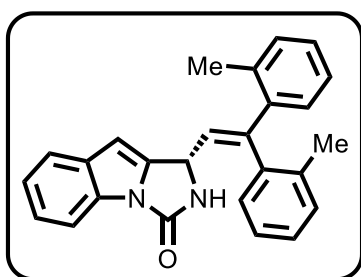

(c 0.1, CHCl<sub>3</sub>); IR (ATR):  $\nu(\text{cm}^{-1}) = 3682, 3458, 3247, 3018, 2925, 2855, 1735, 1215, 747$ ; <sup>1</sup>H NMR (400 MHz, CDCl<sub>3</sub>, 24 °C):  $\delta$  7.90 (d, *J* = 7.5 Hz, 1H), 7.50 (d, *J* = 7.5 Hz, 1H), 7.24-7.19 (m, 4H), 7.17-7.14 (m, 2H), 7.09-7.08 (m, 2H), 7.04-6.98 (m, 2H), 6.32 (s, 1H), 5.78 (s, 1H), 5.65 (d, *J* = 9.5 Hz, 1H), 5.21 (d, *J* = 9.5 Hz, 1H), 2.24 (s, 3H), 2.12 (s, 3H). <sup>13</sup>C{<sup>1</sup>H}

NMR (100 MHz, CDCl<sub>3</sub>, 24 °C):  $\delta$  152.8, 146.4, 140.1, 140.0, 138.3, 136.1, 135.4, 133.4, 131.1, 130.9, 130.5, 130.3, 129.6, 128.4, 128.2, 127.7, 125.9, 125.7, 123.2, 122.7, 121.0, 112.6, 98.0, 52.1, 21.0, 20.1. HRMS (ESI/Q-TOF) *m/z*: [M + H]<sup>+</sup> Calcd for C<sub>26</sub>H<sub>23</sub>N<sub>2</sub>O 379.1805; Found 379.1806.

The enantiomeric ratio (76:24) was determined by Daicel Chiralpak IB (35 °C), Hexane/IPA = 85/15, 1.0 mL/min,  $\lambda = 254$  nm, tR (major) = 6.30 min, tR (minor) = 8.00 min.

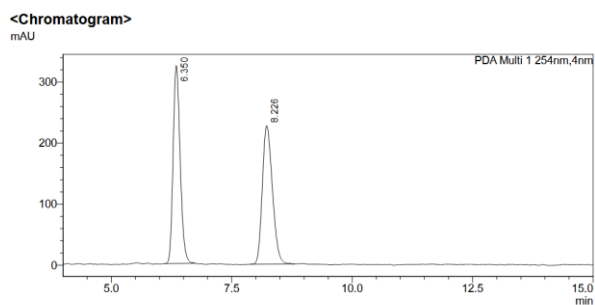

<Peak Table>  
PDA Ch1 254nm

| Peak# | Ret. Time | Area    | Area%   | Height% |
|-------|-----------|---------|---------|---------|
| 1     | 6.350     | 3321176 | 50.117  | 58.848  |
| 2     | 8.226     | 3305620 | 49.883  | 41.152  |
| Total |           | 6626795 | 100.000 | 100.000 |

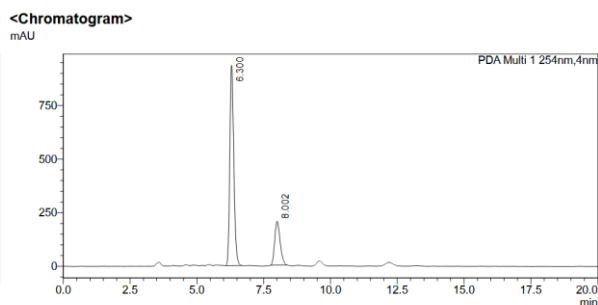

<Peak Table>  
PDA Ch1 254nm

| Peak# | Ret. Time | Area     | Area%   | Height% |
|-------|-----------|----------|---------|---------|
| 1     | 6.300     | 9630236  | 76.760  | 82.000  |
| 2     | 8.002     | 2915748  | 23.240  | 18.000  |
| Total |           | 12545984 | 100.000 | 100.000 |

**(R)-1-(2,2-di-*o*-tolylvinyl)-1,2-dihydro-3H-imidazo[1,5-*a*]indol-3-one (3q)**

Yield: 68% (20 mg); brown colour solid,  $[\alpha]_D^{20} -19.5$  (c 0.1, CHCl<sub>3</sub>).

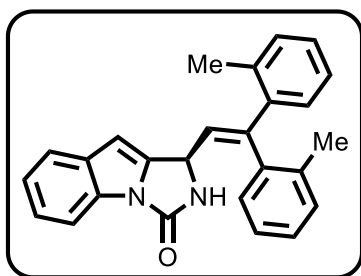

The enantiomeric ratio (43:57) was determined by Daicel Chiralpak IB (35 °C), Hexane/IPA = 85/15, 1.0 mL/min,  $\lambda = 254$  nm, tR (minor) = 5.96 min, tR (major) = 7.53 min.

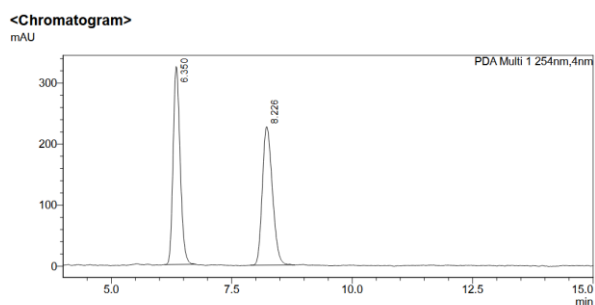

<Peak Table>  
PDA Ch1 254nm

| Peak# | Ret. Time | Area    | Area%   | Height% |
|-------|-----------|---------|---------|---------|
| 1     | 6.350     | 3321176 | 50.117  | 58.848  |
| 2     | 8.226     | 3305620 | 49.883  | 41.152  |
| Total |           | 6626795 | 100.000 | 100.000 |

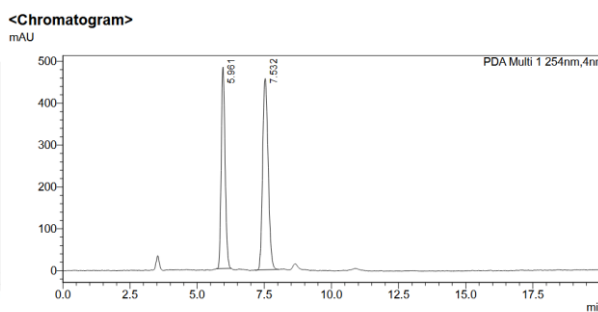

<Peak Table>  
PDA Ch1 254nm

| Peak# | Ret. Time | Area     | Area%   | Height% |
|-------|-----------|----------|---------|---------|
| 1     | 5.961     | 4843345  | 42.455  | 51.308  |
| 2     | 7.532     | 6564891  | 57.545  | 48.692  |
| Total |           | 11408236 | 100.000 | 100.000 |

**(S)-1-(2,2-bis(4-fluorophenyl)vinyl)-1,2-dihydro-3H-imidazo[1,5-*a*]indol-3-one (3r)**

Yield: 50% (22 mg); sandal colour solid; TLC: (25% EtOAc in hexanes, *R*<sub>f</sub>): 0.4;  $[\alpha]_D^{20} +248.3$

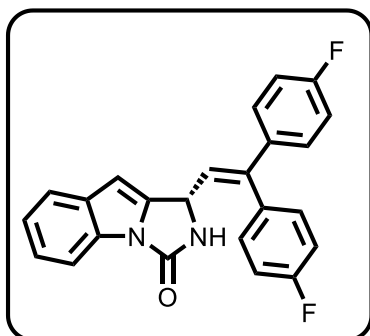

(c 0.1, CHCl<sub>3</sub>); IR (ATR):  $\nu(\text{cm}^{-1}) = 3683, 3458, 3019, 1743, 1603, 1214, 748$ ; <sup>1</sup>H NMR (500 MHz, CDCl<sub>3</sub>, 24 °C):  $\delta$  7.89 (d, *J* = 8.0 Hz, 1H), 7.49 (d, *J* = 7.8 Hz, 1H), 7.24-7.20 (m, 3H), 7.18-7.15 (m, 1H), 7.13-7.07 (m, 4H), 6.89 (t, *J* = 8.2 Hz, 2H), 6.32 (s, 1H), 6.29 (s, 1H), 5.85 (d, *J* = 9.5 Hz, 1H), 5.21 (d, *J* = 9.5 Hz, 1H). <sup>13</sup>C {<sup>1</sup>H} NMR (125 MHz, CDCl<sub>3</sub>, 24 °C):  $\delta$  162.8

(d,  $J = 248.8$  Hz), 162.6 (d,  $J = 248.8$  Hz), 153.1, 144.9, 140.0, 136.6 (d,  $J = 3.4$  Hz), 133.9 (d,  $J = 3.4$  Hz), 133.4, 131.4 (d,  $J = 8.4$  Hz), 130.5, 129.3 (d,  $J = 8.4$  Hz), 124.3, 123.4, 122.8, 121.0, 115.9 (d,  $J = 21.7$  Hz), 115.4 (d,  $J = 21.7$  Hz), 112.5, 98.3, 51.9.  $^{19}\text{F}$  NMR (470 MHz,  $\text{CDCl}_3$ ,  $24^\circ\text{C}$ ):  $\delta$  -112.80, -113.17. HRMS (ESI/Q-TOF)  $m/z$ :  $[\text{M} + \text{H}]^+$  Calcd for  $\text{C}_{24}\text{H}_{17}\text{F}_2\text{N}_2\text{O}$  387.1303; Found 387.1305.

The enantiomeric ratio (95:5) was determined by Daicel Chiralpak IB ( $35^\circ\text{C}$ ), Hexane/IPA = 85/15, 1.0 mL/min,  $\lambda = 254$  nm,  $t_R$  (major) = 6.81 min,  $t_R$  (minor) = 7.18 min.

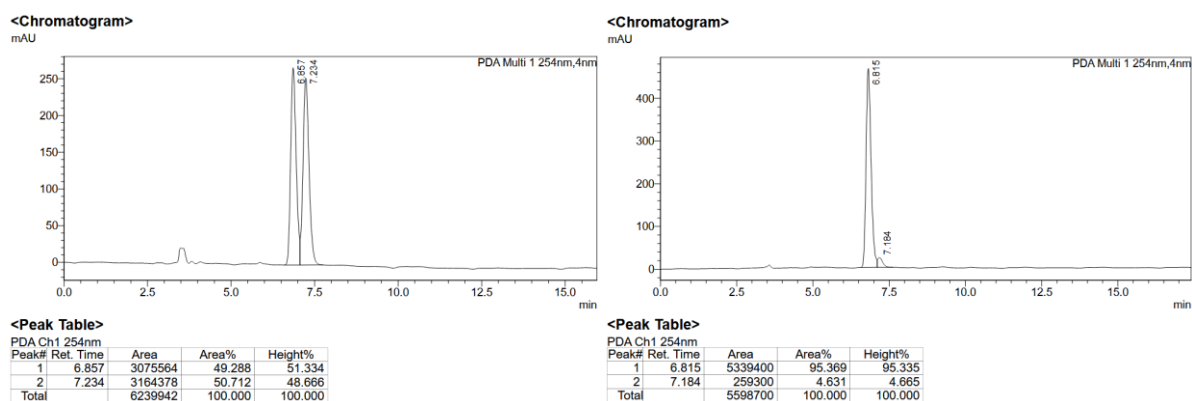

### (*R*)-1-(2,2-bis(4-fluorophenyl)vinyl)-1,2-dihydro-3H-imidazo[1,5-a]indol-3-one (3r)

Yield: 72% (21 mg); sandal colour solid,  $[\alpha]_D^{20} -208.8$  (c 0.1,  $\text{CHCl}_3$ ).

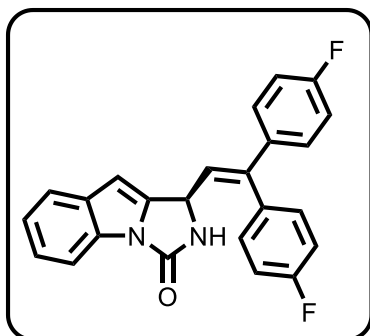

The enantiomeric ratio (10:90) was determined by Daicel Chiralpak IB ( $35^\circ\text{C}$ ), Hexane/IPA = 85/15, 1.0 mL/min,  $\lambda = 254$  nm,  $t_R$  (minor) = 6.88 min,  $t_R$  (major) = 7.26 min.

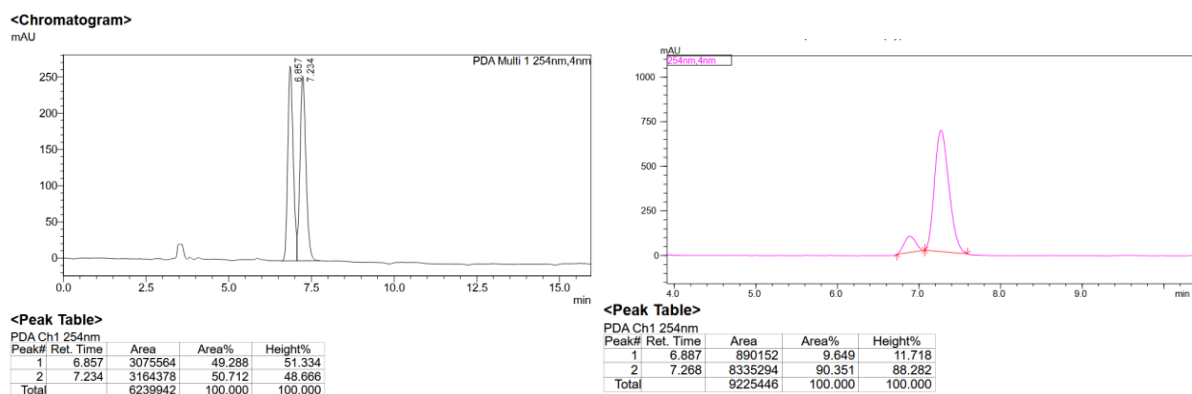

**(S)-1-(2,2-bis(4-chlorophenyl)vinyl)-1,2-dihydro-3H-imidazo[1,5-a]indol-3-one (3s)**

Yield: 47% (23 mg); sandal colour solid; TLC: (25% EtOAc in hexanes,  $R_f$ ): 0.4;  $[\alpha]_D^{20} +208.8$

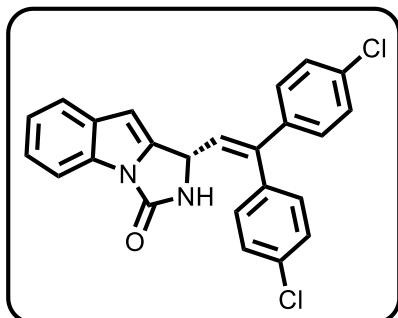

(c 0.1,  $\text{CHCl}_3$ ); IR (ATR):  $\nu(\text{cm}^{-1}) = 3657, 3455, 3242, 3020, 1737, 1452, 1214, 1092, 747$ ;  $^1\text{H NMR}$  (500 MHz,  $\text{CDCl}_3, 24^\circ\text{C}$ ):  $\delta$  7.90 (d,  $J = 8.0$  Hz, 1H), 7.50 (d,  $J = 7.7$  Hz, 1H), 7.40-7.37 (m, 2H), 7.25-7.21 (m, 1H), 7.20-7.16 (m, 5H), 7.09-7.06 (m, 2H), 6.34-6.33 (m, 1H), 6.07 (s, 1H), 5.91 (d,  $J = 9.4$  Hz, 1H), 5.22 (d,  $J = 9.4$  Hz, 1H).  $^{13}\text{C}\{^1\text{H}\}$  NMR (125

MHz,  $\text{CDCl}_3, 24^\circ\text{C}$ ):  $\delta$  152.9, 144.6, 139.6, 138.6, 136.1, 134.6, 134.5, 133.4, 131.0, 130.5, 129.2, 128.8, 128.6, 125.0, 123.5, 122.8, 121.0, 112.6, 98.4, 51.8. HRMS (ESI/Q-TOF)  $m/z$ :  $[\text{M} + \text{H}]^+$  Calcd for  $\text{C}_{24}\text{H}_{17}\text{Cl}_2\text{N}_2\text{O}$  419.0721; Found 419.0717.

The enantiomeric ratio (90:10) was determined by Daicel Chiralpak IG (35  $^\circ\text{C}$ ), Hexane/IPA = 55/45, 1.0 mL/min,  $\lambda = 254$  nm,  $t_R$  (major) = 26.11 min,  $t_R$  (minor) = 12.82 min.

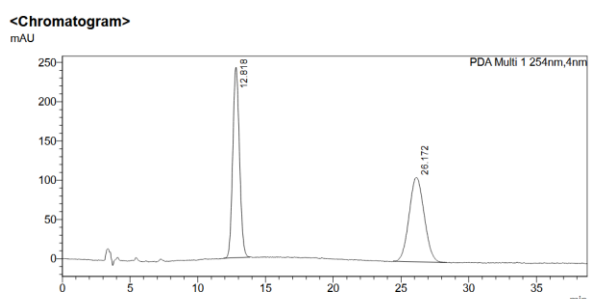

<Peak Table>

| Peak# | Ret. Time | Area     | Area%   | Height% |
|-------|-----------|----------|---------|---------|
| 1     | 12.818    | 8362934  | 50.092  | 69.338  |
| 2     | 26.172    | 8332344  | 49.908  | 30.662  |
| Total |           | 16695278 | 100.000 | 100.000 |

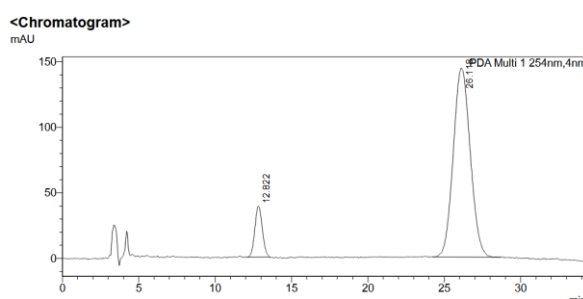

<Peak Table>

| Peak# | Ret. Time | Area     | Area%   | Height% |
|-------|-----------|----------|---------|---------|
| 1     | 12.822    | 1318047  | 10.560  | 21.243  |
| 2     | 26.118    | 11162898 | 89.440  | 78.757  |
| Total |           | 12480945 | 100.000 | 100.000 |

**(R)-1-(2,2-bis(4-chlorophenyl)vinyl)-1,2-dihydro-3H-imidazo[1,5-a]indol-3-one (3s)**

Yield: 62% (20 mg); sandal colour solid,  $[\alpha]_D^{20} -214.1$  (c 0.1,  $\text{CHCl}_3$ ).

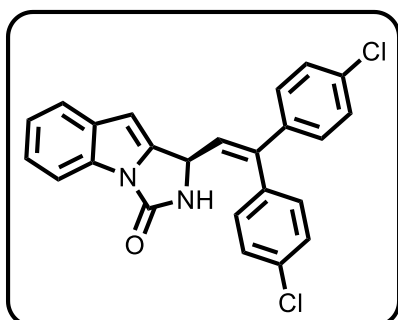

The enantiomeric ratio (10:90) was determined by Daicel Chiralpak IG (35  $^\circ\text{C}$ ), Hexane/IPA = 55/45, 1.0 mL/min,  $\lambda = 254$  nm,  $t_R$  (minor) = 12.77 min,  $t_R$  (major) = 26.09 min.

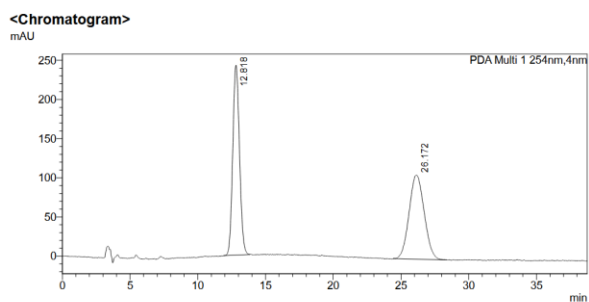

<Peak Table>

| Peak# | Rel. Time | Area     | Area%   | Height% |
|-------|-----------|----------|---------|---------|
| 1     | 12.818    | 8362934  | 50.092  | 69.338  |
| 2     | 26.172    | 8332344  | 49.908  | 30.662  |
| Total |           | 16695278 | 100.000 | 100.000 |

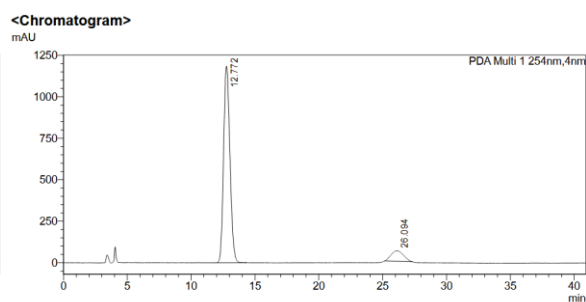

<Peak Table>

| Peak# | Rel. Time | Area     | Area%   | Height% |
|-------|-----------|----------|---------|---------|
| 1     | 12.772    | 40897232 | 90.535  | 94.890  |
| 2     | 26.094    | 4275843  | 9.465   | 5.110   |
| Total |           | 45173074 | 100.000 | 100.000 |

### (S)-1-(2,2-bis(4-bromophenyl)vinyl)-1,2-dihydro-3H-imidazo[1,5-a]indol-3-one (3t)

Yield: 50% (29 mg); pale brown colour solid; TLC: (25% EtOAc in hexanes,  $R_f$ ): 0.3;  $[\alpha]_D^{20}$

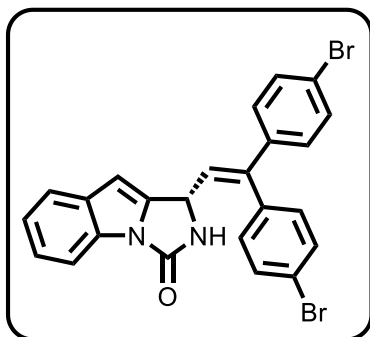

+184.3 (c 0.1,  $\text{CHCl}_3$ ); IR (ATR):  $\nu(\text{cm}^{-1}) = 3680, 3451, 3022, 1732, 1452, 1014, 930$ ;  $^1\text{H NMR}$  (400 MHz,  $\text{DMSO}-d_6, 24^\circ\text{C}$ ):  $\delta$  8.67 (s, 1H), 7.83 (d,  $J = 7.9$  Hz, 1H), 7.61-7.57 (m, 3H), 7.40-7.38 (m, 4H), 7.28-7.20 (m, 4H), 6.55 (s, 1H), 6.16 (d,  $J = 9.5$  Hz, 1H), 5.12 (d,  $J = 9.5$  Hz, 1H).  $^{13}\text{C}\{^1\text{H}\}$  NMR (100 MHz,  $\text{DMSO}-d_6, 24^\circ\text{C}$ ):  $\delta$  152.6, 142.8, 140.8, 139.3, 136.8, 133.6, 133.5, 133.3, 131.9, 130.2, 129.4, 129.3, 128.9, 126.7,

123.1, 122.6, 121.5, 112.0, 97.8, 51.8. HRMS (ESI/Q-TOF)  $m/z$ :  $[\text{M} + \text{H}]^+$  Calcd for  $\text{C}_{24}\text{H}_{17}\text{Br}_2\text{N}_2\text{O}$  506.9702; Found 506.9712.

The enantiomeric ratio (95:5) was determined by Daicel Chiralpak IG (35 °C), Hexane/IPA = 60/40, 1.0 mL/min,  $\lambda = 254$  nm,  $t_R$  (major) = 27.03 min,  $t_R$  (minor) = 13.28 min.

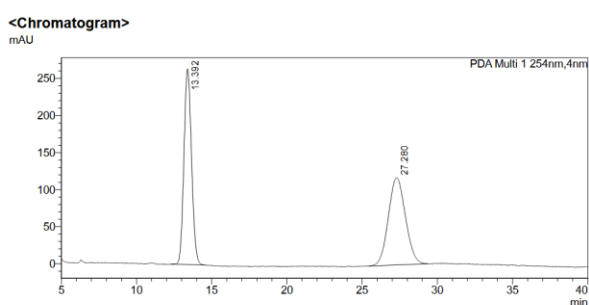

<Peak Table>

| Peak# | Rel. Time | Area     | Area%   | Height% |
|-------|-----------|----------|---------|---------|
| 1     | 13.392    | 9275715  | 49.948  | 69.175  |
| 2     | 27.280    | 9294903  | 50.052  | 30.825  |
| Total |           | 18570618 | 100.000 | 100.000 |

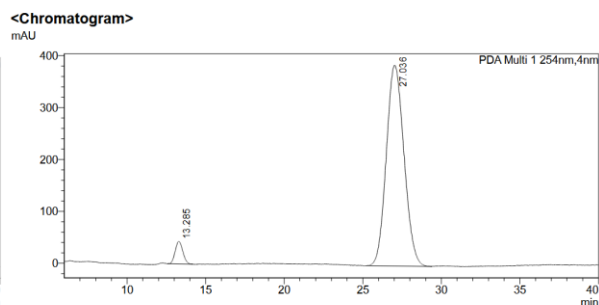

<Peak Table>

| Peak# | Rel. Time | Area     | Area%   | Height% |
|-------|-----------|----------|---------|---------|
| 1     | 13.285    | 1461489  | 4.593   | 10.070  |
| 2     | 27.036    | 30357063 | 95.407  | 89.930  |
| Total |           | 31818552 | 100.000 | 100.000 |

**(R)-1-(2,2-bis(4-bromophenyl)vinyl)-1,2-dihydro-3H-imidazo[1,5-a]indol-3-one (3t)**

Yield: 70% (70 mg); pale brown colour solid,  $[\alpha]_D^{20} -122.4$  (c 0.1, CHCl<sub>3</sub>).

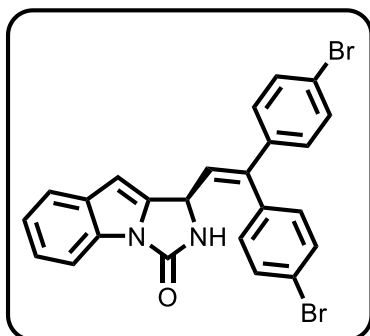

The enantiomeric ratio (11:89) was determined by Daicel Chiralpak IG (35 °C), Hexane/IPA = 60/40, 1.0 mL/min,  $\lambda = 254$  nm, tR (minor) = 27.19 min, tR (major) = 13.30 min.

<Chromatogram>

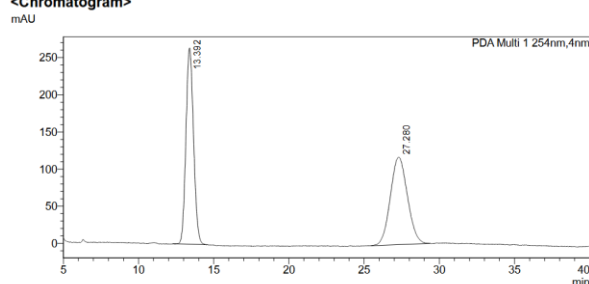

<Peak Table>

| Peak# | Ret. Time | Area     | Area%   | Height% |
|-------|-----------|----------|---------|---------|
| 1     | 13.392    | 9275715  | 49.948  | 69.175  |
| 2     | 27.280    | 9294903  | 50.052  | 30.825  |
| Total |           | 18570618 | 100.000 | 100.000 |

<Chromatogram>

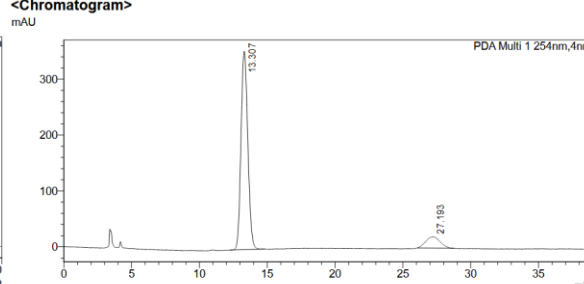

<Peak Table>

| Peak# | Ret. Time | Area     | Area%   | Height% |
|-------|-----------|----------|---------|---------|
| 1     | 13.307    | 12364014 | 89.241  | 94.595  |
| 2     | 27.193    | 1490655  | 10.759  | 5.405   |
| Total |           | 13854669 | 100.000 | 100.000 |

**(S)-1-(2,2-bis(3,5-dimethylphenyl)vinyl)-1,2-dihydro-3H-imidazo[1,5-a]indol-3-one (3u)**

Yield: 50% (24 mg); brown colour solid; TLC: (25% EtOAc in hexanes,  $R_f$ ): 0.4;  $[\alpha]_D^{20} +112.4$

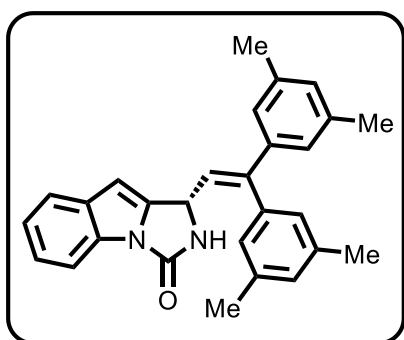

(c 0.1, CHCl<sub>3</sub>); IR (ATR):  $\nu(\text{cm}^{-1}) = 3683, 3459, 3018, 2925, 1737, 1599, 1214, 745, 665$ ; <sup>1</sup>H NMR (500 MHz, CDCl<sub>3</sub>, 24 °C):  $\delta$  7.90 (d,  $J = 7.9$  Hz, 1H), 7.50 (d,  $J = 7.9$  Hz, 1H), 7.22-7.19 (m, 1H), 7.16-7.14 (m, 1H), 6.95 (s, 1H), 6.84 (s, 3H), 6.79 (s, 2H), 6.33 (s, 1H), 5.85-5.83 (m, 2H), 5.25 (d,  $J = 9.4$  Hz, 1H), 2.29 (s, 6H), 2.17 (s, 6H). <sup>13</sup>C {<sup>1</sup>H} NMR (125 MHz, CDCl<sub>3</sub>, 24 °C):  $\delta$  152.9, 147.6, 140.8, 140.7, 138.3,

138.2, 137.8, 133.5, 130.5, 129.9, 129.7, 127.3, 125.4, 123.5, 123.1, 122.6, 120.9, 112.6, 98.0, 52.1, 21.4, 21.2. HRMS (ESI/Q-TOF) m/z:  $[\text{M} + \text{H}]^+$  Calcd for C<sub>28</sub>H<sub>27</sub>N<sub>2</sub>O 407.2118; Found 407.2122.

The enantiomeric ratio (85:15) was determined by Daicel Chiralpak IG (35 °C), Hexane/IPA = 65/35, 1.0 mL/min,  $\lambda = 254$  nm, tR (major) = 7.12 min, tR (minor) = 4.42 min.

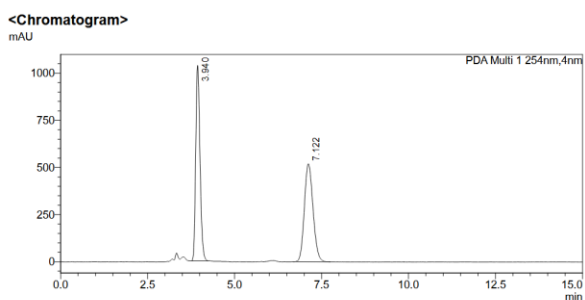

<Peak Table>  
PDA Ch1 254nm

| Peak# | Ret. Time | Area     | Area%   | Height% |
|-------|-----------|----------|---------|---------|
| 1     | 3.940     | 8847971  | 49.584  | 66.661  |
| 2     | 7.122     | 8996439  | 50.416  | 33.339  |
| Total |           | 17844410 | 100.000 | 100.000 |

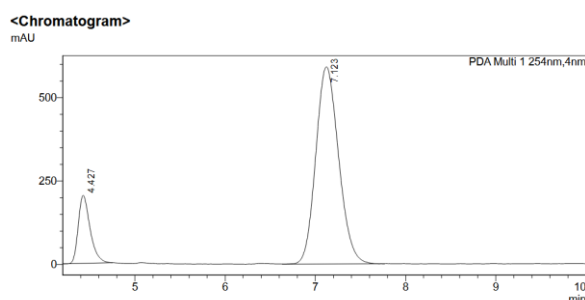

<Peak Table>  
PDA Ch1 254nm

| Peak# | Ret. Time | Area     | Area%   | Height% |
|-------|-----------|----------|---------|---------|
| 1     | 4.427     | 1856514  | 15.155  | 25.689  |
| 2     | 7.123     | 10393896 | 84.845  | 74.311  |
| Total |           | 12250410 | 100.000 | 100.000 |

**(R)-1-(2,2-bis(3,5-dimethylphenyl)vinyl)-1,2-dihydro-3H-imidazo[1,5-a]indol-3-one (3u)**

Yield: 41% (17 mg); brown colour solid,  $[\alpha]_D^{20} -76.4$  (c 0.1,  $\text{CHCl}_3$ ).

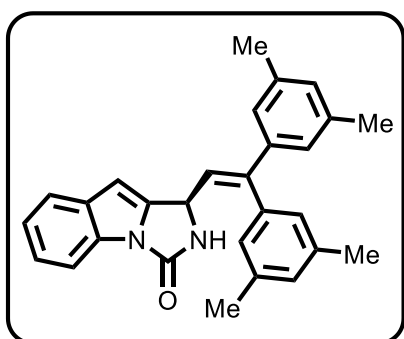

The enantiomeric ratio (22:78) was determined by Daicel Chiralpak IG (35 °C), Hexane/IPA = 65/35, 1.0 mL/min,  $\lambda = 254$  nm, tR (minor) = 7.13 min, tR (major) = 3.91 min.

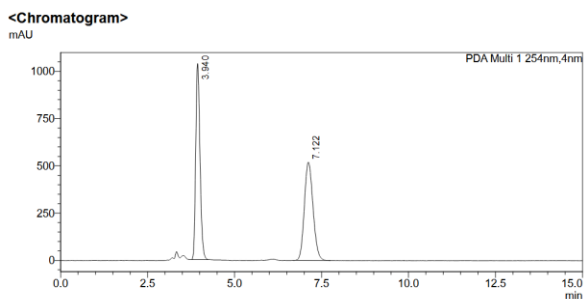

<Peak Table>  
PDA Ch1 254nm

| Peak# | Ret. Time | Area     | Area%   | Height% |
|-------|-----------|----------|---------|---------|
| 1     | 3.940     | 8847971  | 49.584  | 66.661  |
| 2     | 7.122     | 8996439  | 50.416  | 33.339  |
| Total |           | 17844410 | 100.000 | 100.000 |

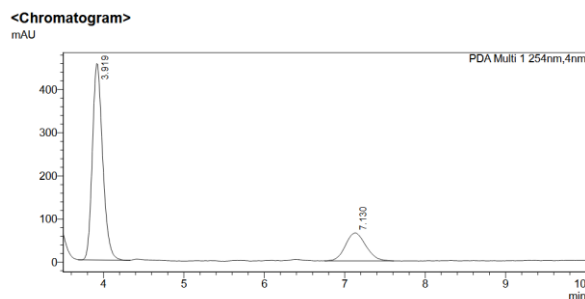

<Peak Table>  
PDA Ch1 254nm

| Peak# | Ret. Time | Area    | Area%   | Height% |
|-------|-----------|---------|---------|---------|
| 1     | 3.919     | 4063485 | 78.020  | 87.566  |
| 2     | 7.130     | 1144781 | 21.980  | 12.434  |
| Total |           | 5208266 | 100.000 | 100.000 |

### (S)-1-(2,2-bis(3-bromophenyl)vinyl)-1,2-dihydro-3H-imidazo[1,5-a]indol-3-one (3v)

Yield: 44% (27 mg); brown colour solid; TLC: (25% EtOAc in hexanes,  $R_f$ ): 0.3;  $[\alpha]_D^{20} +136.8$

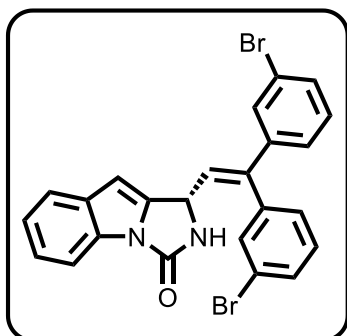

(c 0.1,  $\text{CHCl}_3$ ); IR (ATR):  $\nu(\text{cm}^{-1}) = 3683, 3459, 3019, 2925, 1723, 1631, 1214, 744$ ;  $^1\text{H NMR}$  (500 MHz,  $\text{DMSO-}d_6$ , 24 °C):  $\delta$  8.65 (s, 1H), 7.83 (d,  $J = 8.3$  Hz, 1H), 7.68 (d,  $J = 8.3$  Hz, 1H), 7.61 (d,  $J = 8.3$  Hz, 1H), 7.58 (s, 1H), 7.52-7.49 (m, 2H), 7.44 (s, 1H), 7.41 (d,  $J = 7.5$  Hz, 1H), 7.32-7.25 (m, 2H), 7.22-7.19 (m, 2H), 6.55 (s, 1H), 6.25 (d,  $J = 9.6$  Hz, 1H), 5.09 (d,  $J = 9.6$  Hz, 1H).  $^{13}\text{C}\{^1\text{H}\}$  NMR (125 MHz,  $\text{DMSO-}d_6$ , 24 °C):  $\delta$  153.4,

143.5, 143.0, 141.5, 141.0, 134.5, 133.2, 132.5, 132.3, 132.2, 132.0, 131.0, 130.8, 130.1, 128.7, 127.6, 124.0, 123.47, 123.45, 123.3, 122.4, 112.9, 98.6, 52.5. HRMS (ESI/Q-TOF)  $m/z$ :  $[\text{M} + \text{H}]^+$  Calcd for  $\text{C}_{24}\text{H}_{17}\text{Br}_2\text{N}_2\text{O}$  506.9702; Found 506.9659.

The enantiomeric ratio (92:8) was determined by Daicel Chiralpak IG (35 °C), Hexane/IPA = 50/50, 1.0 mL/min,  $\lambda = 254$  nm,  $t_R$  (major) = 11.72 min,  $t_R$  (minor) = 6.70 min.

<Chromatogram>

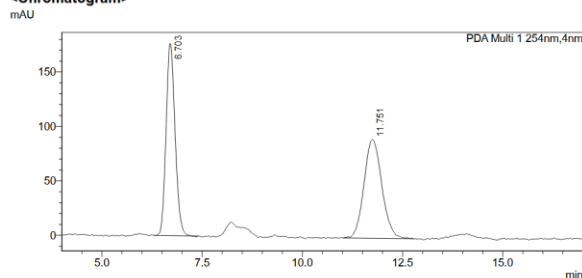

<Peak Table>

| Peak# | Ret. Time | Area    | Area%   | Height% |
|-------|-----------|---------|---------|---------|
| 1     | 6.703     | 2768388 | 49.592  | 66.066  |
| 2     | 11.751    | 2813911 | 50.408  | 33.934  |
| Total |           | 5582299 | 100.000 | 100.000 |

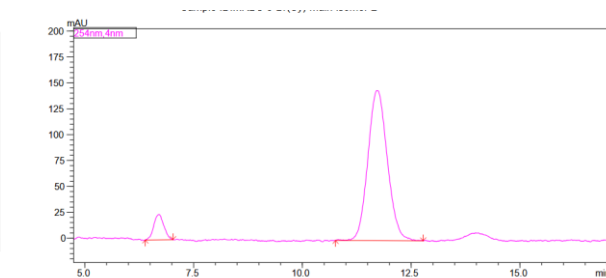

<Peak Table>

| Peak# | Ret. Time | Area    | Area%   | Height% |
|-------|-----------|---------|---------|---------|
| 1     | 6.702     | 394396  | 8.034   | 14.491  |
| 2     | 11.720    | 4514707 | 91.966  | 85.509  |
| Total |           | 4909104 | 100.000 | 100.000 |

### (R)-1-(2,2-bis(3-bromophenyl)vinyl)-1,2-dihydro-3H-imidazo[1,5-a]indol-3-one (3v)

Yield: 48% (18 mg); pale brown colour solid,  $[\alpha]_D^{20} -72.4$  (c 0.1,  $\text{CHCl}_3$ ).

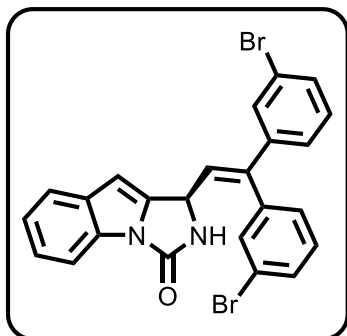

The enantiomeric ratio (14:86) was determined by Daicel Chiralpak IG (35 °C), Hexane/IPA = 50/50, 1.0 mL/min,  $\lambda = 254$  nm,  $t_R$  (minor) = 11.72 min,  $t_R$  (major) = 6.69 min.

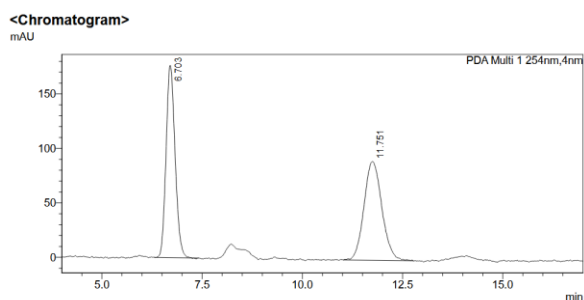

<Peak Table>  
PDA Ch1 254nm

| Peak# | Ret. Time | Area    | Area%   | Height% |
|-------|-----------|---------|---------|---------|
| 1     | 6.703     | 2768388 | 49.592  | 66.066  |
| 2     | 11.751    | 2813911 | 50.408  | 33.934  |
| Total |           | 5582299 | 100.000 | 100.000 |

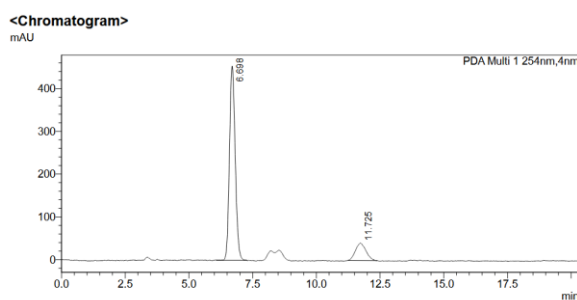

<Peak Table>  
PDA Ch1 254nm

| Peak# | Ret. Time | Area    | Area%   | Height% |
|-------|-----------|---------|---------|---------|
| 1     | 6.698     | 7130504 | 85.959  | 91.774  |
| 2     | 11.725    | 1164781 | 14.041  | 8.226   |
| Total |           | 8295285 | 100.000 | 100.000 |

**(S)-1-((10,11-dihydro-5H-dibenzo[a,d][7]annulen-5-ylidene)methyl)-1,2-dihydro-3H-imidazo[1,5-a]indol-3-one (3w)**

Yield: 85% (37 mg); brown colour solid; TLC: (25% EtOAc in hexanes,  $R_f$ ): 0.4;  $[\alpha]_D^{20} +$

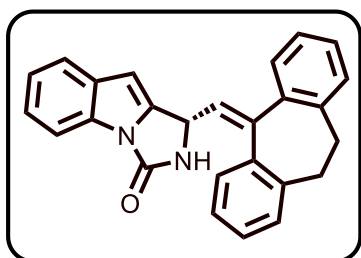

31.1 (c 0.1,  $\text{CHCl}_3$ ); IR (ATR):  $\nu(\text{cm}^{-1}) = 3684, 3459, 3261, 3019, 2925, 1736, 1453, 1215, 749$ ;  $^1\text{H NMR}$  (400 MHz,  $\text{CDCl}_3$ , 24 °C):  $\delta$  7.92-7.88 (m, 1H), 7.58-7.56 (m, 0.6 H), 7.44-7.42 (m, 0.5 H), 7.21-7.15 (m, 7H), 7.11-6.98 (m, 3H), 6.53 (s, 0.5 H), 6.30 (s, 0.3 H), 6.08 (s, 0.4 H), 5.76-5.71 (m, 1.4 H), 5.32-5.24 (m, 1H), 3.44-3.27 (m, 2H), 2.97-2.78 (m, 2H).  $^{13}\text{C}\{^1\text{H}\}$  NMR (100 MHz,  $\text{CDCl}_3$ , 24 °C):  $\delta$  153.3, 152.8, 148.9, 148.1, 140.3, 139.4, 139.2, 138.3, 137.2, 133.5, 130.6, 130.3, 128.6, 128.4, 128.3, 128.0, 127.3, 126.4, 126.3, 126.1, 123.3, 123.2, 122.7, 122.6, 121.0, 112.6, 98.1, 97.9, 51.9, 51.6, 33.6, 31.1. HRMS (ESI/Q-TOF)  $m/z$ :  $[\text{M} + \text{H}]^+$  Calcd for  $\text{C}_{26}\text{H}_{21}\text{N}_2\text{O}$  377.1648; Found 377.1654.

The enantiomeric ratio (65:35) was determined by Daicel Chiralpak IB (35 °C), Hexane/IPA = 85/15, 1.0 mL/min,  $\lambda = 254$  nm,  $t_R$  (major) = 7.11 min,  $t_R$  (minor) = 13.11 min.

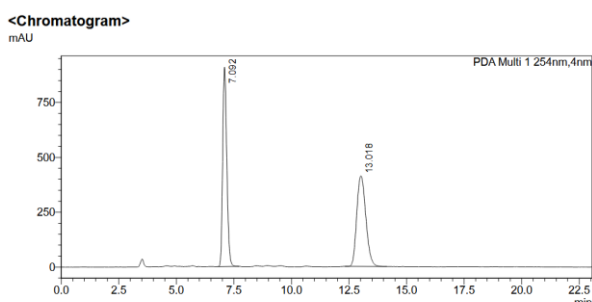

<Peak Table>  
PDA Ch1 254nm

| Peak# | Ret. Time | Area     | Area%   | Height% |
|-------|-----------|----------|---------|---------|
| 1     | 7.092     | 11310885 | 49.967  | 68.757  |
| 2     | 13.018    | 11325881 | 50.033  | 31.243  |
| Total |           | 22636766 | 100.000 | 100.000 |

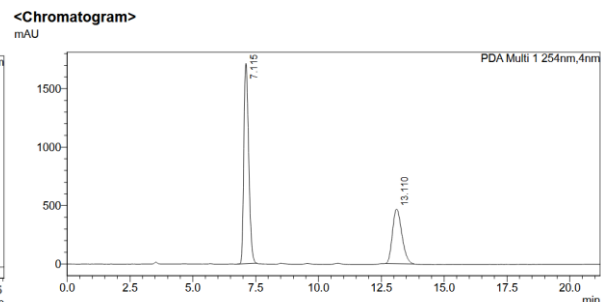

<Peak Table>  
PDA Ch1 254nm

| Peak# | Ret. Time | Area     | Area%   | Height% |
|-------|-----------|----------|---------|---------|
| 1     | 7.115     | 23052592 | 65.485  | 78.546  |
| 2     | 13.110    | 12150449 | 34.515  | 21.454  |
| Total |           | 35203041 | 100.000 | 100.000 |

**(R)-1-((10,11-dihydro-5H-dibenzo[a,d][7]annulen-5-ylidene)methyl)-1,2-dihydro-3H-imidazo[1,5-a]indol-3-one (3w)**

Yield: 68% (20 mg); brown colour solid,  $[\alpha]_D^{20} -67.6$  (c 0.1, CHCl<sub>3</sub>).

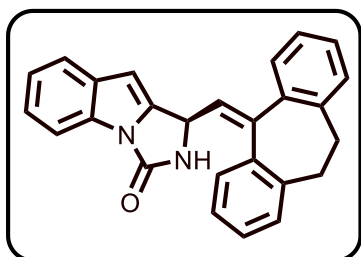

The enantiomeric ratio (33:67) was determined by Daicel Chiralpak IB (35 °C), Hexane/IPA = 85/15, 1.0 mL/min,  $\lambda = 254$  nm, tR (minor) = 7.07 min, tR (major) = 12.93 min.

<Chromatogram>  
mAU

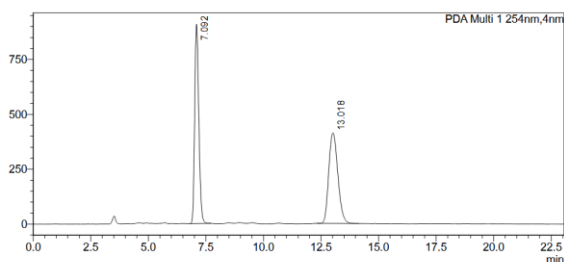

<Peak Table>

| Peak# | Ret. Time | Area     | Area%   | Height% |
|-------|-----------|----------|---------|---------|
| 1     | 7.092     | 11310885 | 49.967  | 68.757  |
| 2     | 13.018    | 11325881 | 50.033  | 31.243  |
| Total |           | 22636766 | 100.000 | 100.000 |

<Chromatogram>  
mAU

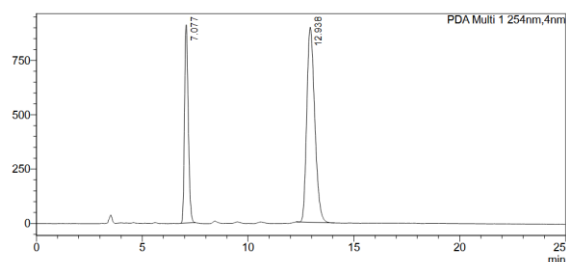

<Peak Table>

| Peak# | Ret. Time | Area     | Area%   | Height% |
|-------|-----------|----------|---------|---------|
| 1     | 7.077     | 11205628 | 32.260  | 50.389  |
| 2     | 12.938    | 23529496 | 67.740  | 49.611  |
| Total |           | 34735124 | 100.000 | 100.000 |

**(S)-1-(2-phenyl-2-(p-tolyl)vinyl)-1,2-dihydro-3H-imidazo[1,5-a]indol-3-one (3x)**

Yield: 78% (33 mg); brown colour semisolid; TLC: (25% EtOAc in hexanes,  $R_f$ ): 0.4;  $[\alpha]_D^{20}$

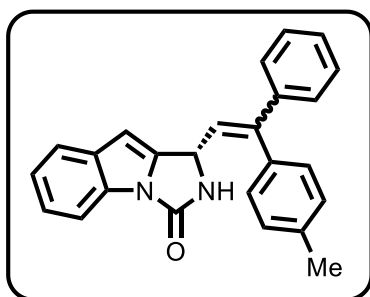

+194.7 (c 0.1, CHCl<sub>3</sub>); IR (ATR):  $\nu(\text{cm}^{-1}) = 3681, 3452, 3261, 3019, 2925, 1738, 1453, 1215, 744$ ; <sup>1</sup>H NMR (400 MHz, CDCl<sub>3</sub>, 24 °C):  $\delta$  7.90 (d,  $J = 7.9$  Hz, 1H), 7.48 (d,  $J = 7.9$  Hz, 1H), 7.39-7.31 (m, 2H), 7.25-7.23 (m, 1H), 7.19-7.14 (m, 6H), 7.06-6.98 (m, 2H), 6.31 (s, 1H), 6.17-6.13 (br, 1H), 5.86 (d,  $J = 9.4$  Hz, 1H), 5.24 (m, 1H), 2.31 (s, 1.59 H), 2.23 (s, 1.43 H).

<sup>13</sup>C{<sup>1</sup>H} NMR (100 MHz, CDCl<sub>3</sub>, 24 °C):  $\delta$  153.0, 147.0, 146.8, 140.8, 140.5, 138.4, 138.3, 138.1, 137.8, 135.3, 133.5, 130.5, 129.7, 129.6, 129.4, 129.0, 128.7, 128.3, 128.2, 128.1, 127.6, 127.5, 123.9, 123.2, 123.1, 122.6, 121.0, 112.6, 98.1, 52.1, 21.2, 21.1. HRMS (ESI/Q-TOF) m/z:  $[\text{M} + \text{H}]^+$  Calcd for C<sub>25</sub>H<sub>21</sub>N<sub>2</sub>O 365.1648; Found 365.1650.

The enantiomeric ratio (98:2) was determined by Daicel Chiralpak IG (35 °C), Hexane/IPA = 60/40, 1.0 mL/min,  $\lambda = 254$  nm, tR (major) = 24.63, 37.47 min, tR (minor) = 11.07, 12.32 min.

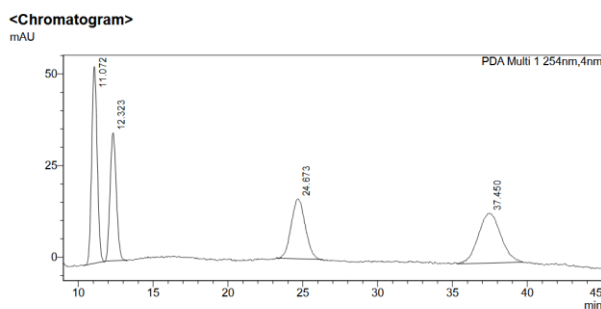

<Peak Table>  
PDA Ch1 254nm

| Peak# | Ret. Time | Area    | Area%   | Height% |
|-------|-----------|---------|---------|---------|
| 1     | 11.072    | 1375058 | 28.168  | 45.269  |
| 2     | 12.323    | 1014171 | 20.775  | 29.445  |
| 3     | 24.673    | 1064550 | 21.807  | 13.788  |
| 4     | 37.450    | 1427920 | 29.250  | 11.497  |
| Total |           | 4881700 | 100.000 | 100.000 |

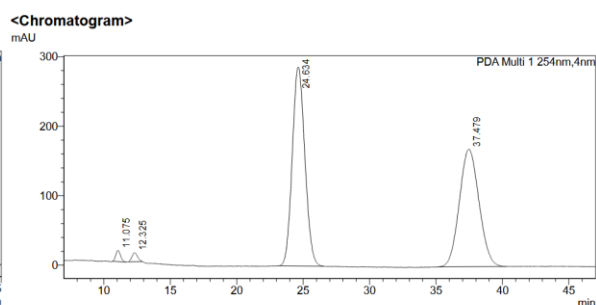

<Peak Table>  
PDA Ch1 254nm

| Peak# | Ret. Time | Area     | Area%   | Height% |
|-------|-----------|----------|---------|---------|
| 1     | 11.075    | 398719   | 1.076   | 3.294   |
| 2     | 12.325    | 364051   | 0.962   | 2.597   |
| 3     | 24.634    | 18901868 | 51.002  | 59.163  |
| 4     | 37.479    | 17396899 | 48.940  | 34.946  |
| Total |           | 37061337 | 100.000 | 100.000 |

**(R)-1-(2-phenyl-2-(p-tolyl)vinyl)-1,2-dihydro-3H-imidazo[1,5-a]indol-3-one (3x)**

Yield: 78% (22 mg); brown colour semisolid,  $[\alpha]_D^{20} -186.9$  (c 0.1, CHCl<sub>3</sub>).

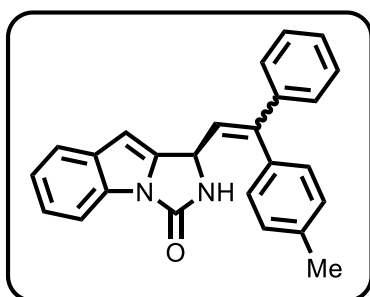

The enantiomeric ratio (13.5:86.5) was determined by Daicel Chiralpak IG (35 °C), Hexane/IPA = 60/40, 1.0 mL/min,  $\lambda = 254$  nm, tR (minor) = 25.00, 37.86 min, tR (major) = 11.18, 12.45 min.

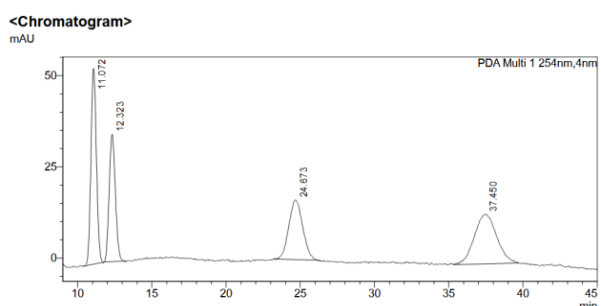

<Peak Table>  
PDA Ch1 254nm

| Peak# | Ret. Time | Area    | Area%   | Height% |
|-------|-----------|---------|---------|---------|
| 1     | 11.072    | 1375058 | 28.168  | 45.269  |
| 2     | 12.323    | 1014171 | 20.775  | 29.445  |
| 3     | 24.673    | 1064550 | 21.807  | 13.788  |
| 4     | 37.450    | 1427920 | 29.250  | 11.497  |
| Total |           | 4881700 | 100.000 | 100.000 |

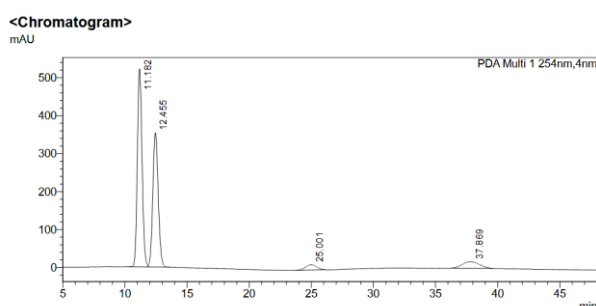

<Peak Table>  
PDA Ch1 254nm

| Peak# | Ret. Time | Area     | Area%   | Height% |
|-------|-----------|----------|---------|---------|
| 1     | 11.182    | 13720550 | 50.996  | 57.558  |
| 2     | 12.455    | 10688224 | 39.726  | 39.013  |
| 3     | 25.001    | 859300   | 3.184   | 1.534   |
| 4     | 37.869    | 1637120  | 6.085   | 1.884   |
| Total |           | 26905194 | 100.000 | 100.000 |

**(S)-1-(2-phenylprop-1-en-1-yl)-1,2-dihydro-3H-imidazo[1,5-a]indol-3-one (3y)**

Yield: 80% (27 mg); <sup>1</sup>H NMR (500 MHz, DMSO-*d*<sub>6</sub>, 24 °C):  $\delta$  8.55 (s, 2.7 H), 8.28 (d, *J* = 8.2 Hz, 1.6 H), 7.78 (d, *J* = 8.2 Hz, 1H), 7.57 (d, *J* = 8.2 Hz, 1.3 H), 7.51 (d, *J* = 7.5 Hz, 2H), 7.45-7.39 (m, 4.5 H), 7.36-7.32 (m, 8.7 H), 7.23-7.15 (m, 8H), 6.70 (s, 1.6 H), 6.45 (s,

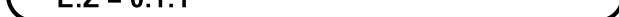

1H), 5.80-5.78 (m, 0.1H), 5.75-5.72 (m, 0.1H), 5.43 (d,  $J = 9.2$  Hz, 1H), 5.07 (d,  $J = 9.2$  Hz, 1H) 3.44-3.42 (m, 2.1 H), 2.94 (d,  $J = 8.6$  Hz, 1.7 H), 2.26 (s, 0.3 H), 2.08 (s, 3H), 1.06 (s, 5.2 H).  $^{13}\text{C}\{^1\text{H}\}$  NMR (125 MHz, DMSO- $d_6$ , 24 °C):  $\delta$ . 152.6, 149.3, 144.1, 141.9, 141.7, 140.2, 134.8, 133.6, 130.1, 129.5, 129.05, 129.01, 128.2, 128.1, 126.8, 126.7, 126.0, 124.2, 123.5, 123.0, 122.9, 122.5, 121.5, 120.1, 115.6, 112.0, 106.0, 51.6, 27.5, 25.5, 21.2, 13.7.

The enantiomeric ratio (94:6) was determined by Daicel Chiralpak IB (35 °C), Hexane/IPA = 85/15, 1.0 mL/min,  $\lambda = 254$  nm, tR (major) = 6.96, 37.47 min, tR (minor) = 5.39, 12.32 min.

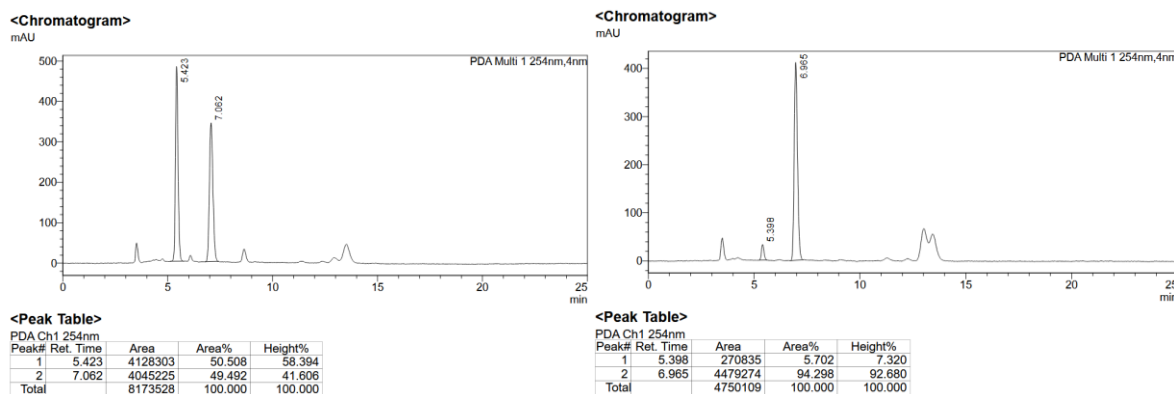

### (*R*)-1-(2-phenylprop-1-en-1-yl)-1,2-dihydro-3H-imidazo[1,5-a]indol-3-one (3y)

Yield: 82% (19 mg)

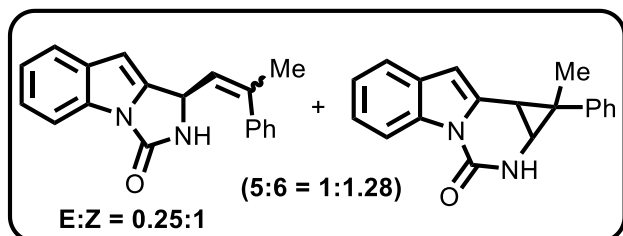

The enantiomeric ratio (8:92) was determined by Daicel Chiralpak IB (35 °C), Hexane/IPA = 85/15, 1.0 mL/min,  $\lambda = 254$  nm, tR (minor) = 7.05, 37.86 min, tR (major) = 5.42, 12.45 min.

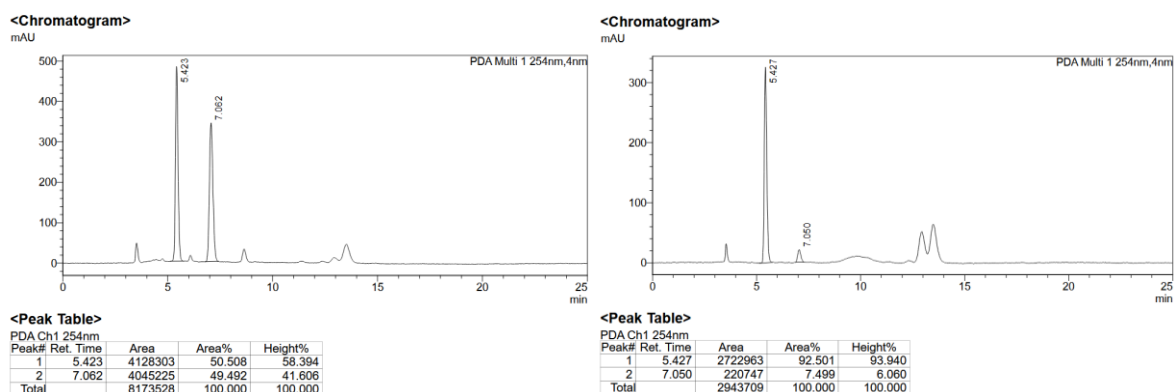

## 9. Synthetic application:

### 1 mmol scale reaction

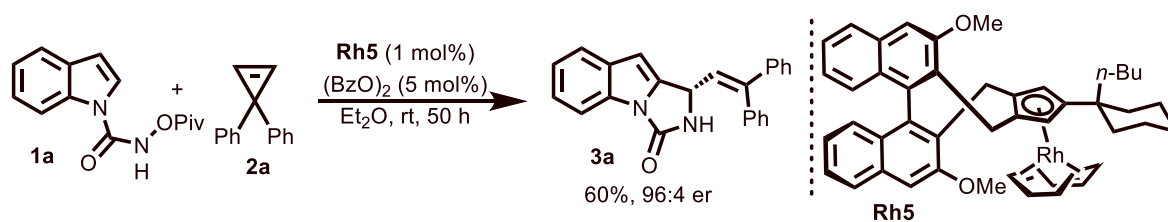

In a reaction tube, (*R*)-**Rh5** (0.01 mmol, 1 mol%),  $(\text{BzO})_2$  (0.05 mmol, 5 mol%), and *N*-(pivaloyloxy)-1*H*-indole-1-carboxamide **1a** (260 mg, 1 mmol, 1 equiv) were added. The mixture was dissolved in diethyl ether (8.0 mL), and the reaction mixture was stirred at room temperature for 5 min. Then, the solution of cyclopropene **2a** (290 mg, 1.5 mmol, 1.5 equiv) in diethyl ether (2 mL) was added to the reaction tube and stirred at room temperature for 50 h. The reaction was monitored by TLC. After 50 h, the obtained reaction mixture was purified by column chromatography using hexane/ethyl acetate as an eluent to afford products **3a** in 60% yield (210 mg).

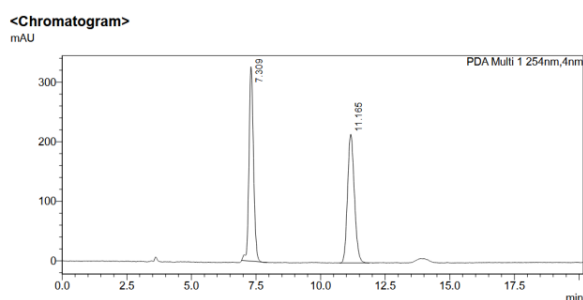

<Peak Table>  
PDA Ch1 254nm

| Peak# | Ret. Time | Area    | Area%   | Height% |
|-------|-----------|---------|---------|---------|
| 1     | 7.309     | 3984011 | 49.991  | 60.171  |
| 2     | 11.165    | 3985421 | 50.009  | 39.829  |
| Total |           | 7969431 | 100.000 | 100.000 |

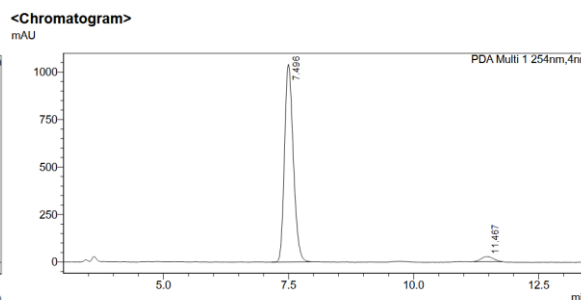

<Peak Table>  
PDA Ch1 254nm

| Peak# | Ret. Time | Area     | Area%   | Height% |
|-------|-----------|----------|---------|---------|
| 1     | 7.496     | 12746115 | 96.533  | 97.463  |
| 2     | 11.467    | 457816   | 3.467   | 2.537   |
| Total |           | 13203931 | 100.000 | 100.000 |

### Hydrogenation of **3a**

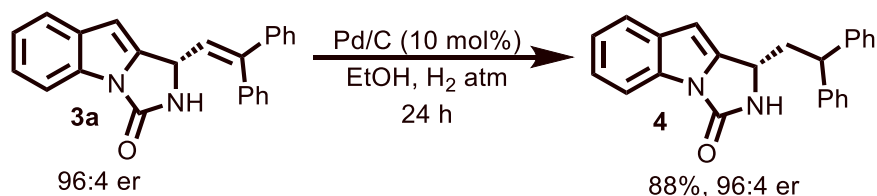

In a dry reaction tube, compound **3a** (30 mg, 0.16 mmol) was taken, followed by ethanol (3 mL) and  $\text{Pd/C}$  (10 mol%, 10 mg) were added. The reaction mixture was stirred under hydrogen atmosphere ( $\text{H}_2$ , 10 bar) at room temperature. After 20 h, the reaction mixture was filtered through the short pad of Celite and washed with ethanol. The filtrate was concentrated under

reduced pressure to obtain the crude. The crude product was purified by flash column chromatography with EtOAc/hexane as an eluent to afford the desired product **4**. Yield: 88% (24 mg): colourless semisolid;  $[\alpha]_D^{20} -20.0$  (c 0.1, CHCl<sub>3</sub>); <sup>1</sup>H NMR (400 MHz, CDCl<sub>3</sub>, 24 °C): δ 7.91 (d, *J* = 8.1 Hz, 1H), 7.50 (d, *J* = 7.4 Hz, 1H), 7.25-7.20 (m, 9H), 7.18-7.12 (m, 3H), 6.28 (s, 1H), 6.25 (s, 1H), 4.53-4.50 (m, 1H), 4.24-4.20 (m, 1H), 2.58-2.52 (m, 1H), 2.46-2.39 (m, 1H). <sup>13</sup>C{<sup>1</sup>H} NMR (100 MHz, CDCl<sub>3</sub>, 24 °C): δ 153.2, 143.2, 143.1, 141.1, 133.3, 130.2, 128.9 (one carbon signal is merging), 127.79, 127.76, 126.9, 126.8, 123.2, 122.6, 120.9, 112.5, 97.5, 51.8, 48.2, 41.7. HRMS (ESI/Q-TOF) *m/z*: [M + H]<sup>+</sup> Calcd for C<sub>24</sub>H<sub>21</sub>N<sub>2</sub>O 353.1648; Found 353.1652.

The enantiomeric ratio (96:4) was determined by Daicel Chiralpak IB (35 °C), Hexane/IPA = 85/15, 1.0 mL/min, λ = 254 nm, tR (major) = 11.49 min, tR (minor) = 9.31 min.

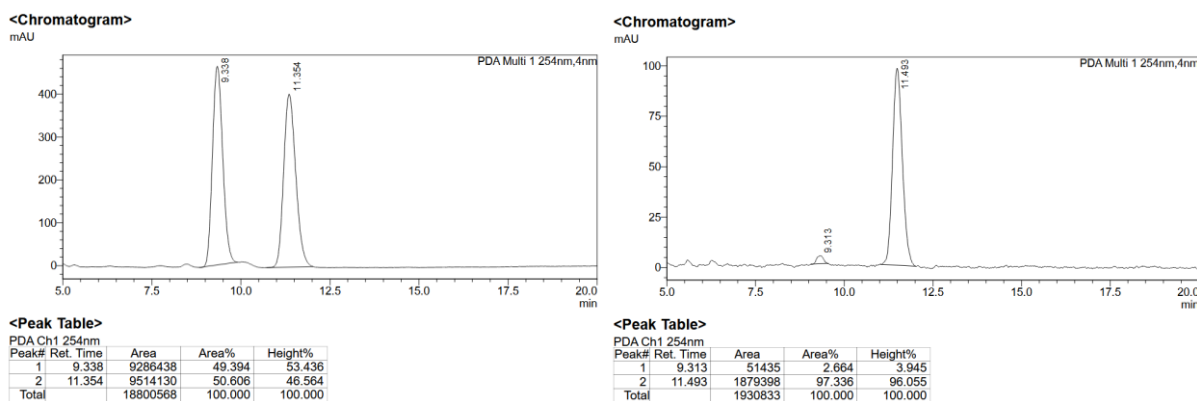

### Bromination of **3a**:

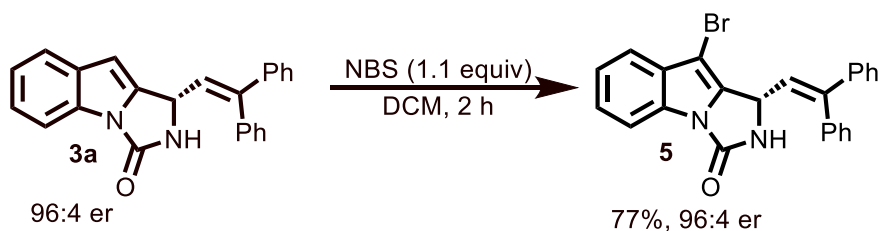

In a dry reaction tube, compound **3a** was taken (20 mg, 0.057 mmol, 1 equiv) and dissolved in dichloromethane (3 mL). *N*-Bromosuccinimide (11 mg, 0.068 mmol, 1 equiv) was added under an argon atmosphere. After complete conversion of the starting material, the reaction mixture was purified in column chromatography using ethyl acetate/hexane to get the corresponding brominated product **5**. Yield: 79% (19 mg): pale yellow solid;  $[\alpha]_D^{20} +90.0$  (c 0.1, CHCl<sub>3</sub>); <sup>1</sup>H NMR (400 MHz, CDCl<sub>3</sub>, 24 °C): δ 7.89-7.87 (m, 1H), 7.47-7.45 (m, 1H), 7.41-7.37 (m, 2H),

7.34-7.23 (m, 3H), 7.29-7.23 (m, 2H), 7.20-7.19 (m, 5H), 6.00 (s, 1H), 5.86 (d,  $J = 9.6$  Hz, 1H), 5.25 (d,  $J = 9.6$  Hz, 1H).  $^{13}\text{C}\{^1\text{H}\}$  NMR (100 MHz,  $\text{CDCl}_3$ , 24 °C):  $\delta$  152.2, 148.6, 140.6, 138.3, 136.7, 132.2, 130.0, 129.8, 128.7, 128.4, 128.3, 128.2, 127.6, 124.4, 123.2, 121.5, 119.4, 112.7, 87.8, 52.1. HRMS (ESI/Q-TOF)  $m/z$ :  $[\text{M} + \text{H}]^+$  Calcd for  $\text{C}_{24}\text{H}_{18}\text{BrN}_2\text{O}$  429.0597; Found 429.0597.

The enantiomeric ratio (96:4) was determined by Daicel Chiralpak IB (35 °C), Hexane/IPA = 85/15, 1.0 mL/min,  $\lambda = 254$  nm,  $t_R$  (major) = 7.31 min,  $t_R$  (minor) = 11.53 min.

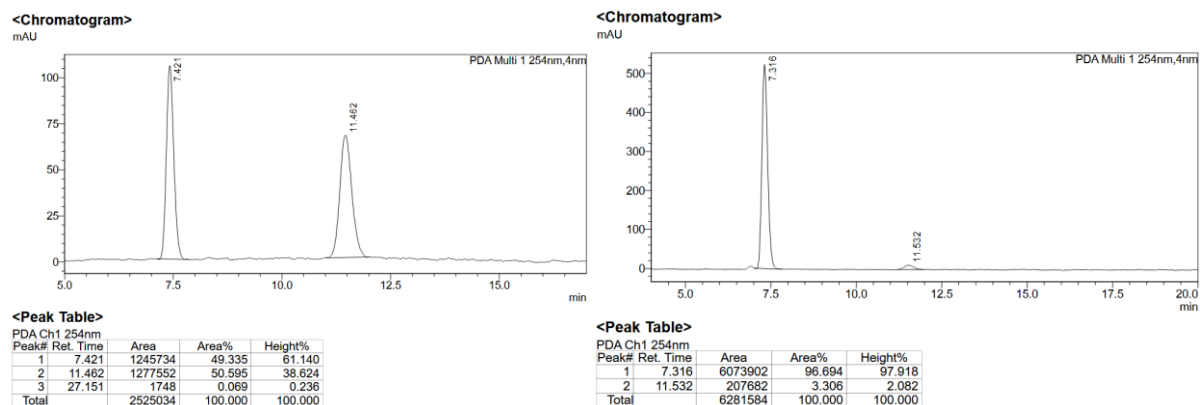

### Arylthiolation of **3a**:

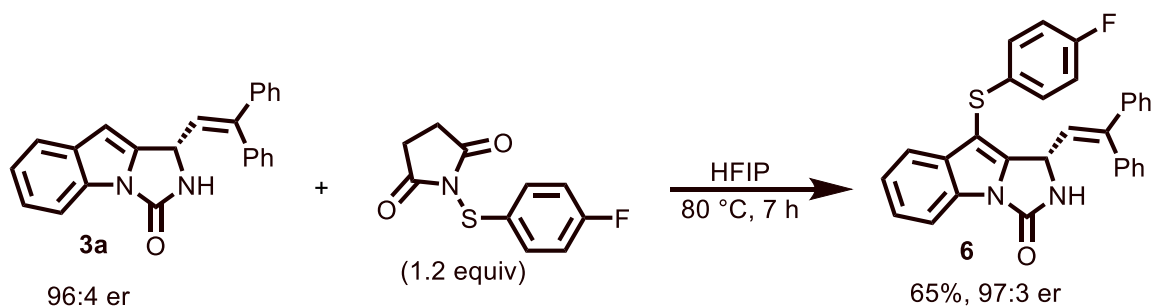

In a dry reaction flask, compound **3a** (25 mg, 0.071 mmol, 1 equiv) and 1-(4-fluorophenyl)thio)pyrrolidine-2,5-dione (20 mg, 0.085, 1.2 equiv) were taken. The compound was dissolved in HFIP (2 mL) under an argon atmosphere. The reaction mixture was stirred at 80 °C for 7 h. After completion of the starting materials, the reaction mixture was concentrated under reduced pressure using a rotavapor. The crude product was purified by column chromatography using EtOAc/hexane as an eluent to afford compound **6** in 65% yield (23 mg) as a pale-yellow solid;  $[\alpha]_D^{26} +12.4$  (c 0.35,  $\text{CHCl}_3$ );  $^1\text{H}$  NMR (500 MHz,  $\text{DMSO}-d_6$ , 24 °C):  $\delta$  8.97 (s, 1H), 7.90 (d,  $J = 8.1$  Hz, 1H), 7.49 (d,  $J = 8.1$  Hz, 1H), 7.39-7.32 (m, 6H), 7.28-7.19 (m, 4H), 7.15-7.12 (m, 2H), 7.03-7.00 (m, 2H), 6.96-6.95 (m, 2H), 5.99 (d,  $J = 10.0$  Hz, 1H),

5.24 (d,  $J = 10.0$  Hz, 1H).  $^{13}\text{C}\{^1\text{H}\}$  NMR (125 MHz,  $\text{DMSO}-d_6$ , 24 °C):  $\delta$  160.9 (d,  $J = 242.4$  Hz), 152.2, 146.4, 146.2, 140.9, 138.5, 134.3, 133.1 (d,  $J = 2.8$  Hz), 130.5, 130.0, 128.9, 128.6, 128.5 (d,  $J = 8.2$  Hz), 128.4, 128.3, 127.6, 124.2, 123.4, 123.1, 119.4, 116.5 (d,  $J = 22.2$  Hz), 112.6, 97.2, 52.3.  $^{19}\text{F}$  NMR (470 MHz,  $\text{CDCl}_3$ , 24 °C):  $\delta$  -117.54. HRMS (ESI/Q-TOF)  $m/z$ :  $[\text{M} + \text{H}]^+$  Calcd for  $\text{C}_{30}\text{H}_{22}\text{FN}_2\text{OS}$  477.1437; Found 477.1450.

The enantiomeric ratio (97:3) was determined by Daicel Chiralpak IB (35 °C), Hexane/IPA = 90/10, 1.0 mL/min,  $\lambda = 254$  nm,  $t_R$  (major) = 10.19 min,  $t_R$  (minor) = 11.65 min.

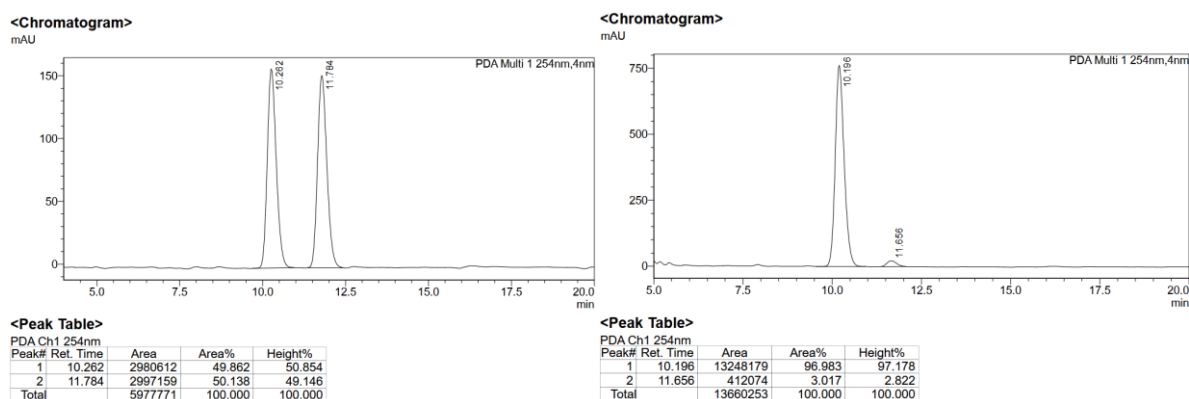

### Epoxidation of **3g**:

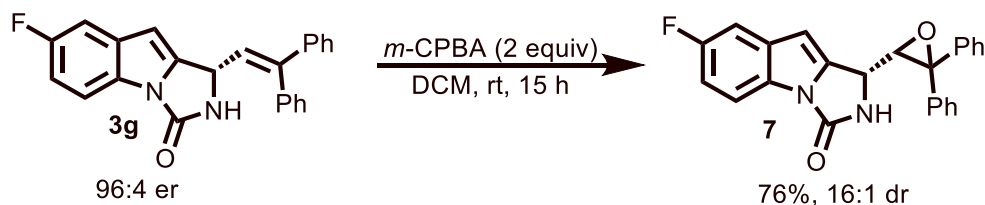

In a dry reaction flask, compound **3g** (20 mg, 0.052 mmol, 1 equiv) was taken. The compound was dissolved in dry DCM (2 mL) under an argon atmosphere, followed by meta-chloroperoxybenzoic acid (*m*-CPBA) (18 mg, 0.1 mmol, 2 equiv) was added with constant stirring. Once all the starting material has converted into the product, monitored by TLC, the reaction mixture is diluted with DCM (2 mL) and then washed with a saturated solution of  $\text{NaHCO}_3$ . The organic layer was dried over anhydrous  $\text{Na}_2\text{SO}_4$  and concentrated under reduced pressure. The crude product was purified by column chromatography using EtOAc/hexane as an eluent to afford compound **7** in 76% yield (16 mg) as a colourless solid.  $^1\text{H}$  NMR (500 MHz,  $\text{CDCl}_3$ , 24 °C):  $\delta$  7.85-7.82 (m, 1H), 7.51-7.49 (m, 2H), 7.41-7.38 (m, 2H), 7.33-7.31 (m, 1H), 7.26 (m, 5H), 7.18-7.15 (m, 1H), 6.99-6.95 (m, 1H), 6.31 (s, 1H), 5.79 (s, 1H), 4.18 (d,  $J = 8.7$  Hz, 1H), 3.54 (d,  $J = 8.7$  Hz, 1H).  $^{13}\text{C}\{^1\text{H}\}$  NMR (125 MHz,  $\text{CDCl}_3$ , 24 °C):  $\delta$  160.2, 158.3,

152.0, 138.8, 137.5, 136.3, 133.8 (d,  $J = 10.1$  Hz), 128.8, 128.6, 128.5, 127.5, 127.3, 127.1, 113.4 (d,  $J = 9.9$  Hz), 111.96 (d,  $J = 25.9$  Hz), 106.5 (d,  $J = 23.5$  Hz), 98.9 (d,  $J = 4.1$  Hz), 67.0, 66.1, 53.1.  $^{19}\text{F}$  NMR (470 MHz,  $\text{CDCl}_3$ ,  $24^\circ\text{C}$ ):  $\delta$  -119.71. HRMS (ESI/Q-TOF)  $m/z$ :  $[\text{M} + \text{H}]^+$  Calcd for  $\text{C}_{24}\text{H}_{18}\text{FN}_2\text{O}_2$  385.1347; Found 385.1362.

## 10. Control experiments:

### Deuterium exchange experiment:

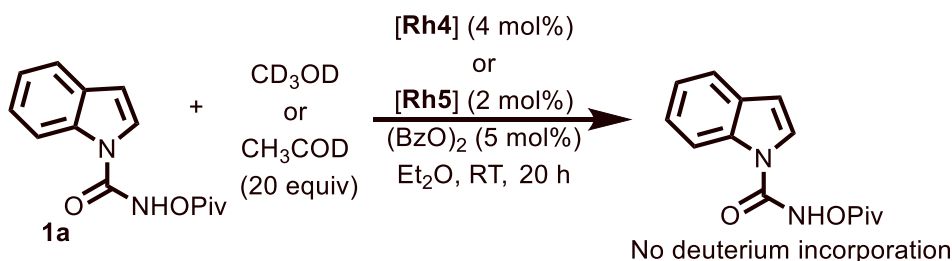

In a reaction tube, **Rh4** or **Rh5** (4 mol% or 2 mol%),  $(\text{BzO})_2$  (5 mol%), and *N*-(pivaloyloxy)-1H-indole-1-carboxamide **1a** (30 mg, 0.11 mmol, 1 equiv) were taken. The reaction mixture was dissolved in diethyl ether (1.0 mL), and the reaction mixture was stirred at room temperature. Followed by  $\text{CD}_3\text{OD}$  or  $\text{CH}_3\text{COD}$  (20 equiv) was added, the reaction mixture was stirred at room temperature for 20 h. Evaporation of solvent followed by purification through column chromatography using hexane/ethyl acetate as an eluent gave the product.  $^1\text{H}$  NMR analysis of the isolated compound revealed that no deuterium incorporation was observed at the indole second position in both reaction conditions.

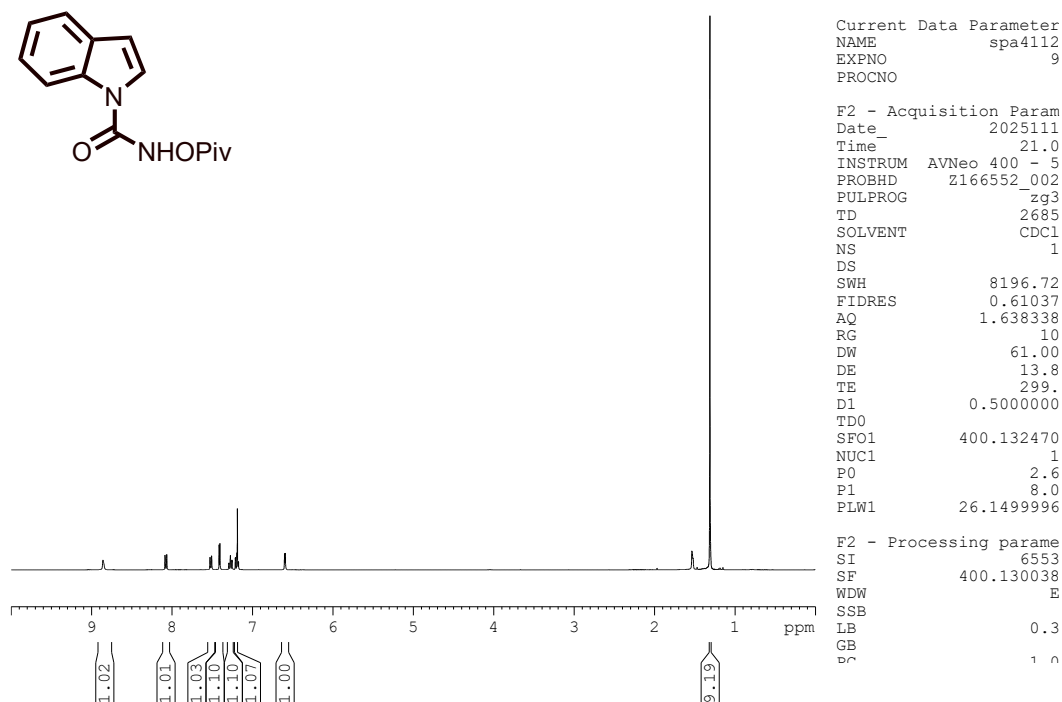

### Isolation of complex **8**:

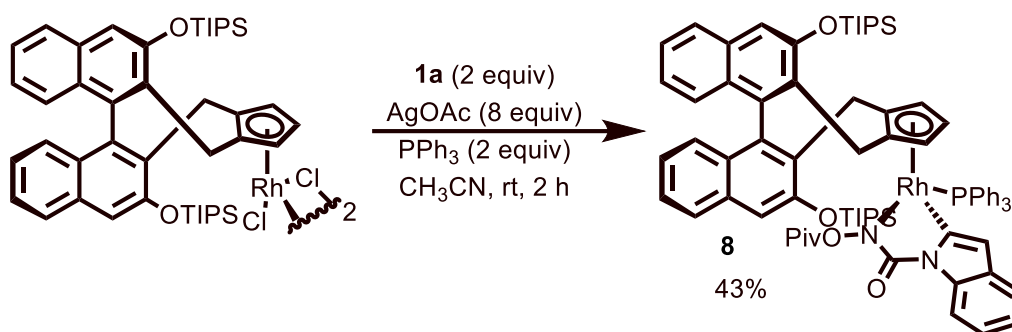

In a dry reaction tube, **Rh4-Cl** (20 mg, 0.011 mmol, 1 equiv), **1a** (6 mg, 0.023 mmol, 2 equiv), and AgOAc (16 mg, 0.093 mmol, 8 equiv) were taken, followed by acetonitrile (3 mL) was added under N<sub>2</sub> atmosphere with continuous stirring at room temperature. After stirring at room temperature for 40 min, PPh<sub>3</sub> (6 mg, 0.023 mmol, 2 equiv) was added and stirred further for 1 h. The reaction mixture was filtered through a PTFE syringe and washed with 10 mL of acetonitrile. The filtrate was concentrated under reduced pressure. The crude was purified by column chromatography using (ethyl acetate/ hexane) to obtain the **8** as a yellow solid, 43% yield (14 mg). <sup>1</sup>H NMR (400 MHz, CDCl<sub>3</sub>, 24 °C): δ 8.03 (d, *J* = 7.9 Hz, 1H, ArH), 7.69 (d, *J* = 7.9 Hz, 1H, ArH), 7.63 (d, *J* = 7.9 Hz, 1H, ArH), 7.38-7.34 (m, 7H, ArH), 7.28-7.22 (m, 4H, ArH), 7.12-7.08 (m, 6H, ArH), 6.98-6.92 (m, 4H, ArH), 6.84-6.71 (m, 5H, ArH), 6.06 (s, 1H, ArH), 5.42 (s, 1H, CpC-H), 5.06 (s, 1H, CpH), 4.14-4.06 (m, 2H, CpH&CH<sub>2</sub>-H), 3.88 (d, *J* = 13.6 Hz, 1H, CH<sub>2</sub>-H), 3.10 (t, *J* = 2.3 Hz, 1H, CH<sub>2</sub>-H), 2.81 (t, *J* = 16.0 Hz, 1H, CH<sub>2</sub>-H), 1.39-1.33 (m, 2H), 1.12-1.07 (m, 19 H), 0.81-0.79 (m, 2H), 0.73-0.69 (m, 19H), 0.38 (s, 9H, - (CH<sub>3</sub>)<sub>3</sub>); <sup>13</sup>C {<sup>1</sup>H} NMR (125 MHz, CDCl<sub>3</sub>, 24 °C): δ 176.1 (C=O), 158.7 (C=O), 152.3, 151.5, 137.8, 137.3, 136.7, 134.0, 133.5, 132.4, 130.0, 129.3, 128.9, 128.1, 127.8, 127.7, 127.6, 126.7, 126.5, 126.1, 125.9, 125.3, 124.1, 123.6, 119.1, 118.2, 116.8, 115.4, 113.5, 112.8, 112.7, 112.3, 107.7, 99.62, 99.60, 91.4, 91.3, 37.7, 31.9, 31.6, 29.6, 29.4, 29.3, 29.2, 27.5, 26.7, 26.0, 25.6, 24.7, 22.6, 18.25, 18.22, 17.9, 17.8, 14.1, 13.2, 12.5. <sup>31</sup>P NMR (202 MHz, CDCl<sub>3</sub>): δ = 35.2 (d, *J* = 147.5 Hz). HRMS (ESI/Q-TOF) *m/z*: [M + H]<sup>+</sup> Calcd for C<sub>77</sub>H<sub>89</sub>N<sub>2</sub>O<sub>5</sub>PRhSi<sub>2</sub> 1311.5097; Found 1311.5083.

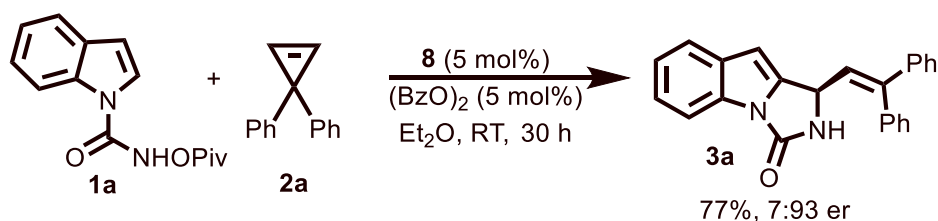

In a reaction tube, **8** (0.0019 mmol, 5 mol%), (BzO)<sub>2</sub> (0.0019 mmol, 5 mol%), and *N*-(pivaloyloxy)-1H-indole-1-carboxamide **1a** (10 mg, 0.03 mmol, 1 equiv) were added. The mixture was dissolved in diethyl ether (1.0 mL), and the reaction mixture was stirred at room temperature for 5 min. Then, the solution of cyclopropene **2a** (12 mg, 0.057 mmol, 1.5 equiv) in diethyl ether (0.5 mL) was added to the reaction tube and stirred at room temperature for 20 h. The reaction was monitored by TLC. After complete consumption of the starting material, the obtained reaction mixture was purified by column chromatography using hexane/ethyl acetate as an eluent to afford products **3a** in 77% yield (11 mg).

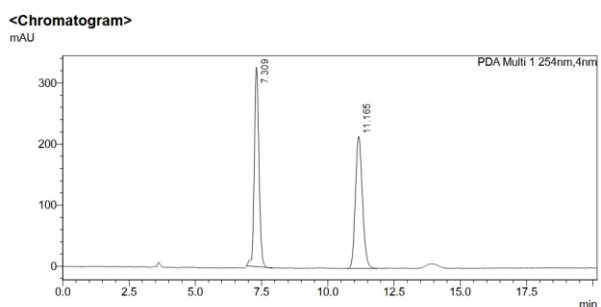

<Peak Table>  
PDA Ch1 254nm

| Peak# | Ret. Time | Area    | Area%   | Height% |
|-------|-----------|---------|---------|---------|
| 1     | 7.309     | 3994011 | 49.991  | 60.171  |
| 2     | 11.165    | 3985421 | 50.009  | 39.829  |
| Total |           | 7969431 | 100.000 | 100.000 |

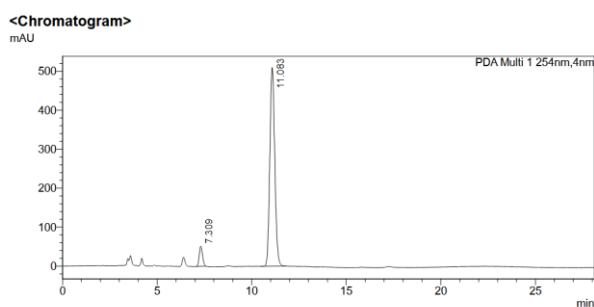

<Peak Table>  
PDA Ch1 254nm

| Peak# | Ret. Time | Area    | Area%   | Height% |
|-------|-----------|---------|---------|---------|
| 1     | 7.309     | 625281  | 6.321   | 9.240   |
| 2     | 11.083    | 9266219 | 93.679  | 90.760  |
| Total |           | 9891500 | 100.000 | 100.000 |

### Unsuccessful substrates

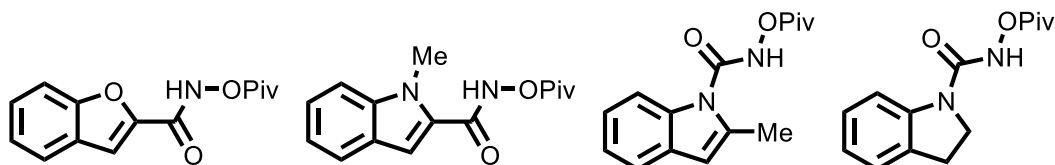

## 11. Plausible mechanism and stereochemical outcome:

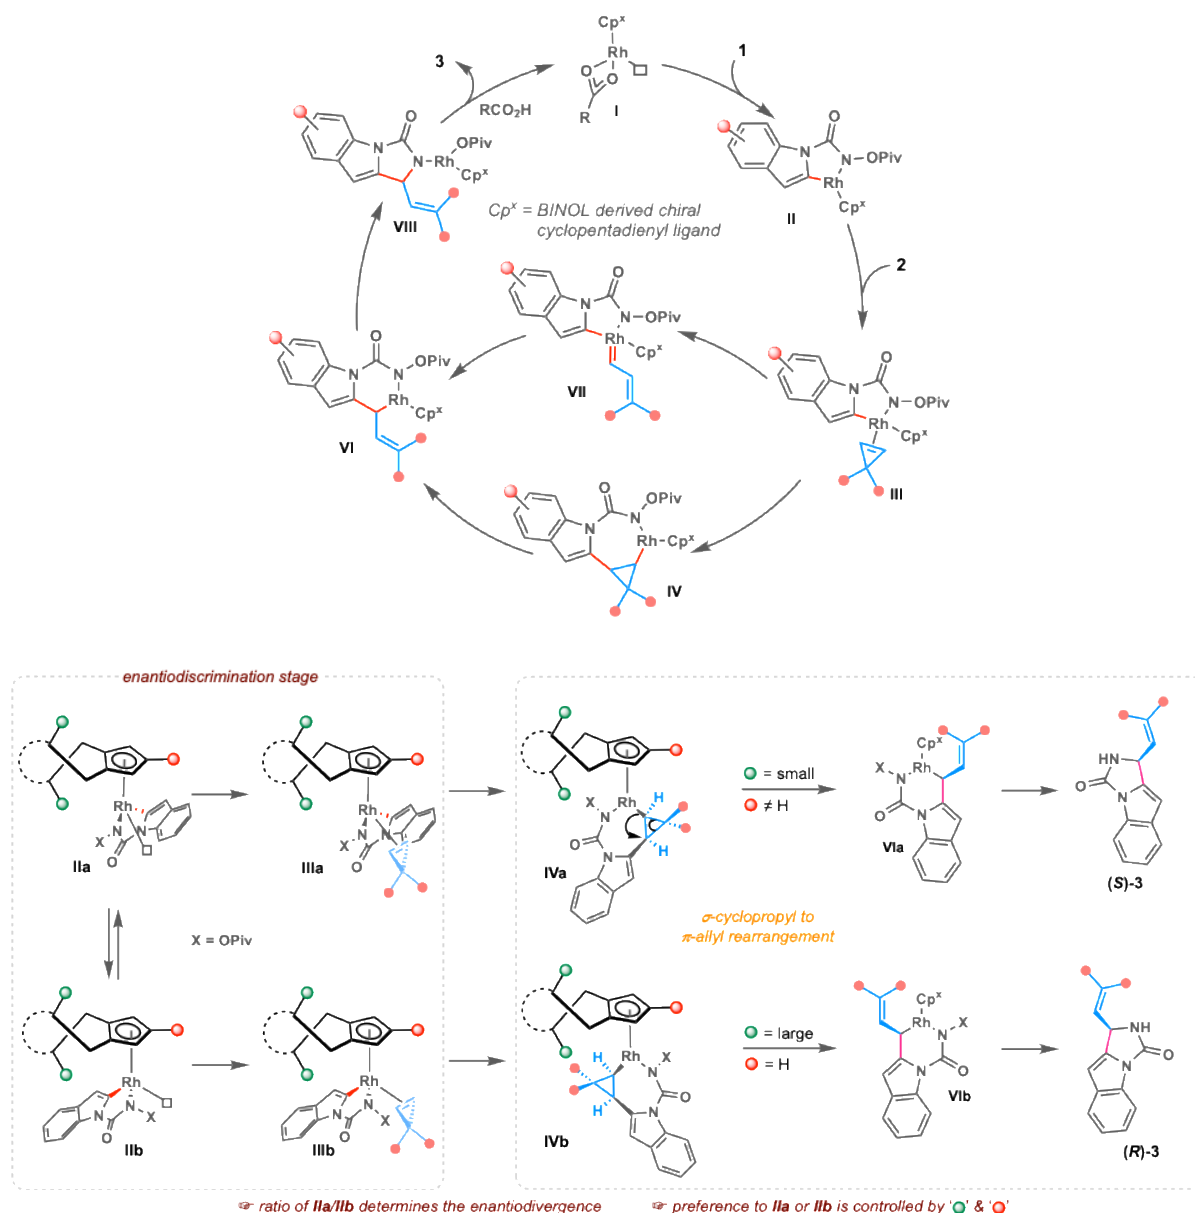

Reversal of chirality is originated from the preferential formation of either **IIa** over **IIb** or **IIIa** over **IIIb**, since both faces of cyclopropenes are identical. Based on our observation, it is clear that preferential formation of **IIa** over **IIb** is controlled by the presence of substituent on the cyclopentadienyl ligand. When no addition substituent is present in cyclopentadienyl ligand, as in **Rh4-cat.**, the catalyst favours **IIb** and afford the (**R**)-**3** as major enantiomer. On the other, presence of substituent in cyclopentadienyl ligand, as in **Rh5-cat.**, the catalyst favours the formation of **IIa** and affords the (**S**)-**3** as major enantiomer.

## 12. Spectral data

### N-(pivaloyloxy)-1H-indole-1-carboxamide (1a)

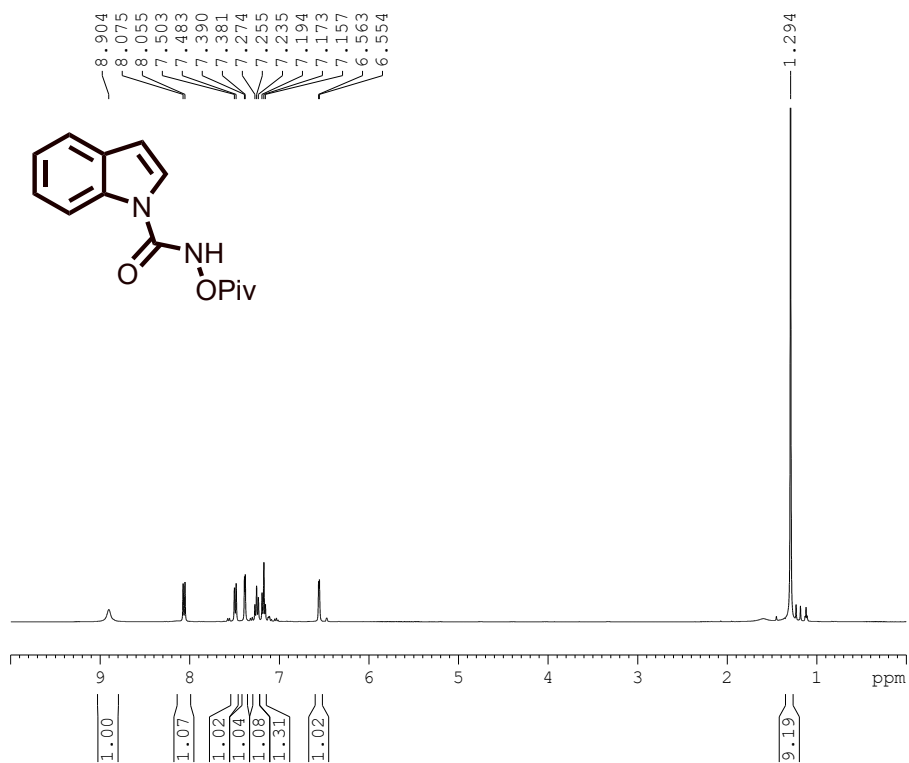

Current Data Parameter  
 NAME spa4012  
 EXPNO 18  
 PROCNO

F2 - Acquisition Param  
 Date\_ 2026011  
 Time\_ 1.4  
 INSTRUM AVNeo 400 - 5  
 PROBHD Z166552\_002  
 PULPROG zg3  
 TD 6553  
 SOLVENT CDCl  
 NS 1  
 DS  
 SWH 8196.72  
 FIDRES 0.25014  
 AQ 3.997696  
 RG 10  
 DW 61.00  
 DE 13.8  
 TE 300.  
 D1 1.0000000  
 TD0  
 SF01 400.132470  
 NUC1 1  
 P0 2.6  
 P1 8.0  
 PLW1 26.1499996

F2 - Processing param  
 SI 6553  
 SF 400.130044  
 WDW E  
 SSB  
 LB 0.3  
 GB  
 PC 1.0

### <sup>1</sup>H NMR (400 MHz, CDCl<sub>3</sub>) spectrum of 1a

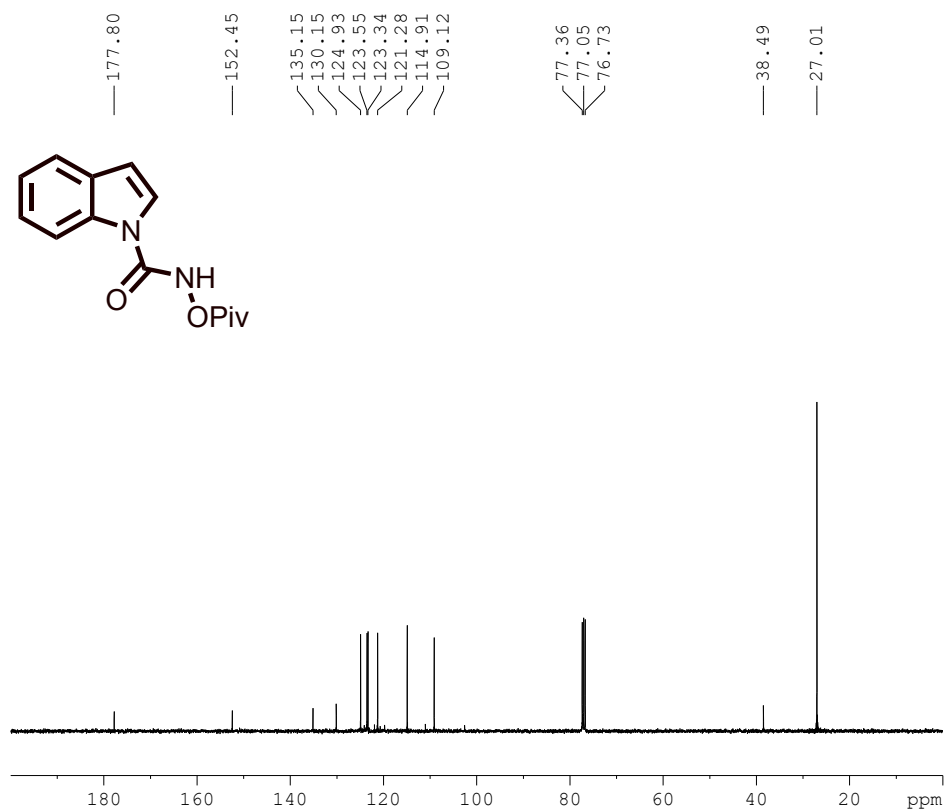

Current Data Parameter  
 NAME spa4012  
 EXPNO 18  
 PROCNO

F2 - Processing param  
 SI 3276  
 SF 100.612768  
 WDW E  
 SSB  
 LB 1.0  
 GB  
 PC 1.4

### <sup>13</sup>C NMR (100 MHz, CDCl<sub>3</sub>) spectrum of 1a

### 4-methyl-N-(pivaloyloxy)-1H-indole-1-carboxamide (1b)

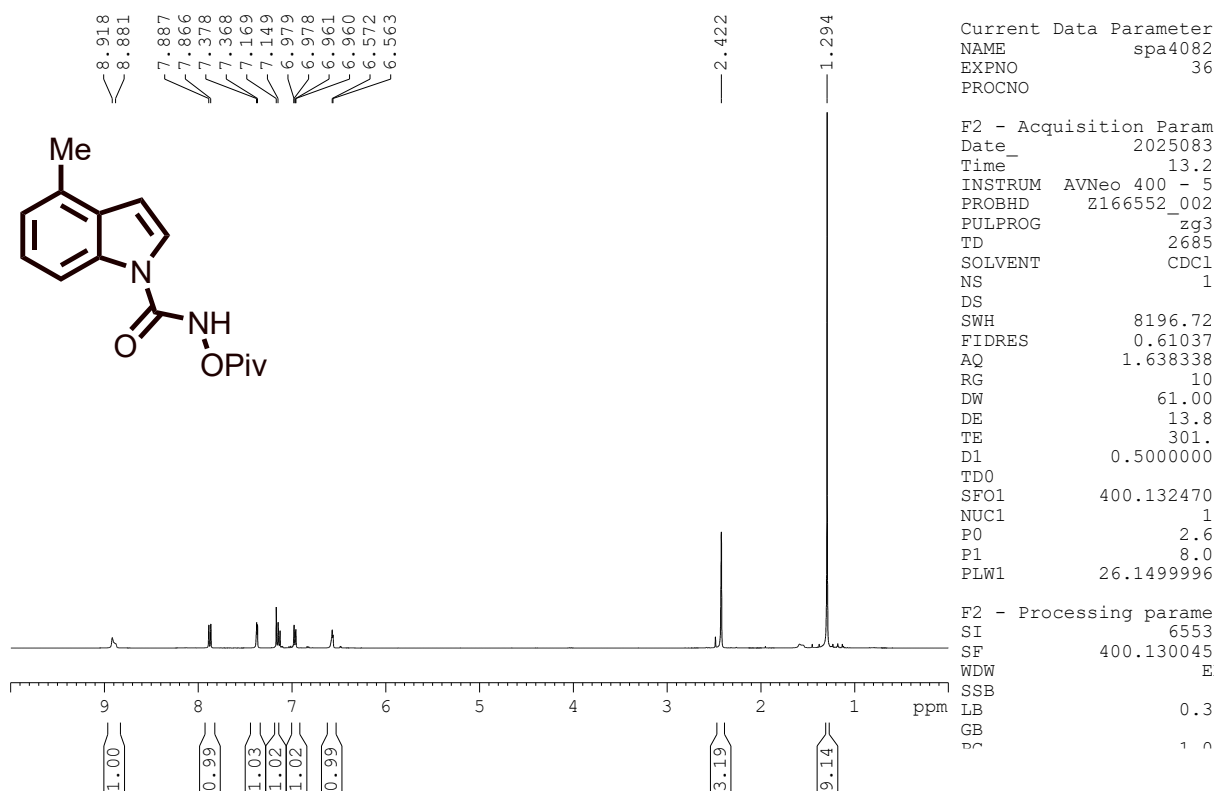

<sup>1</sup>H NMR (400 MHz, CDCl<sub>3</sub>) spectrum of 1b

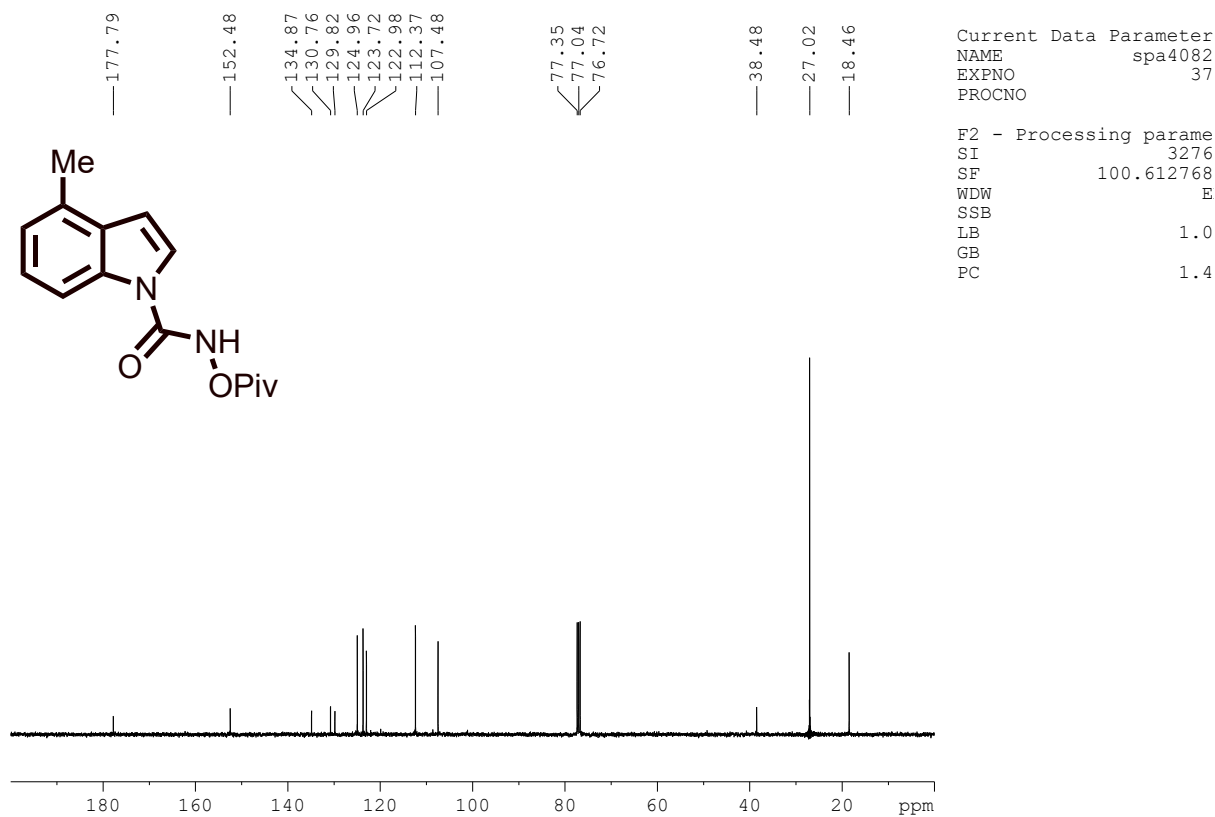

<sup>13</sup>C NMR (100 MHz, CDCl<sub>3</sub>) spectrum of 1b

### 5-methyl-N-(pivaloyloxy)-1H-indole-1-carboxamide (1c)

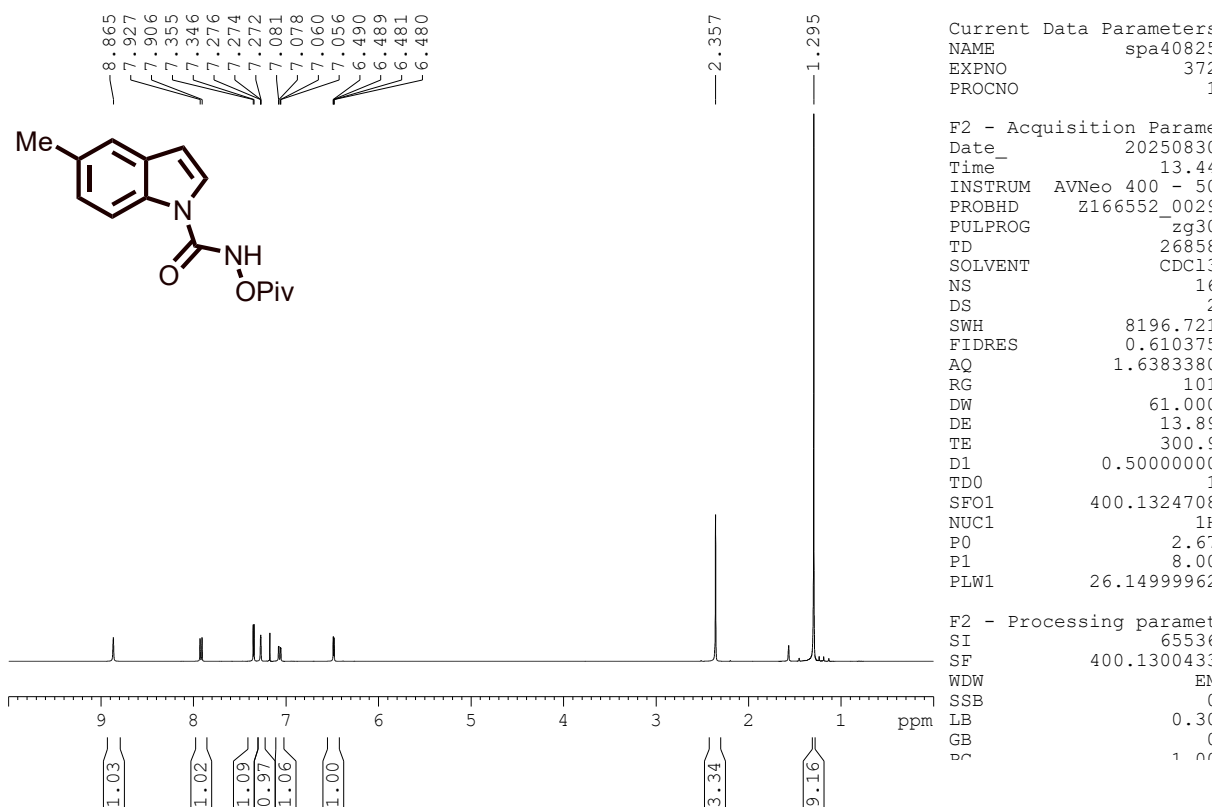

<sup>1</sup>H NMR (400 MHz, CDCl<sub>3</sub>) spectrum of 1c

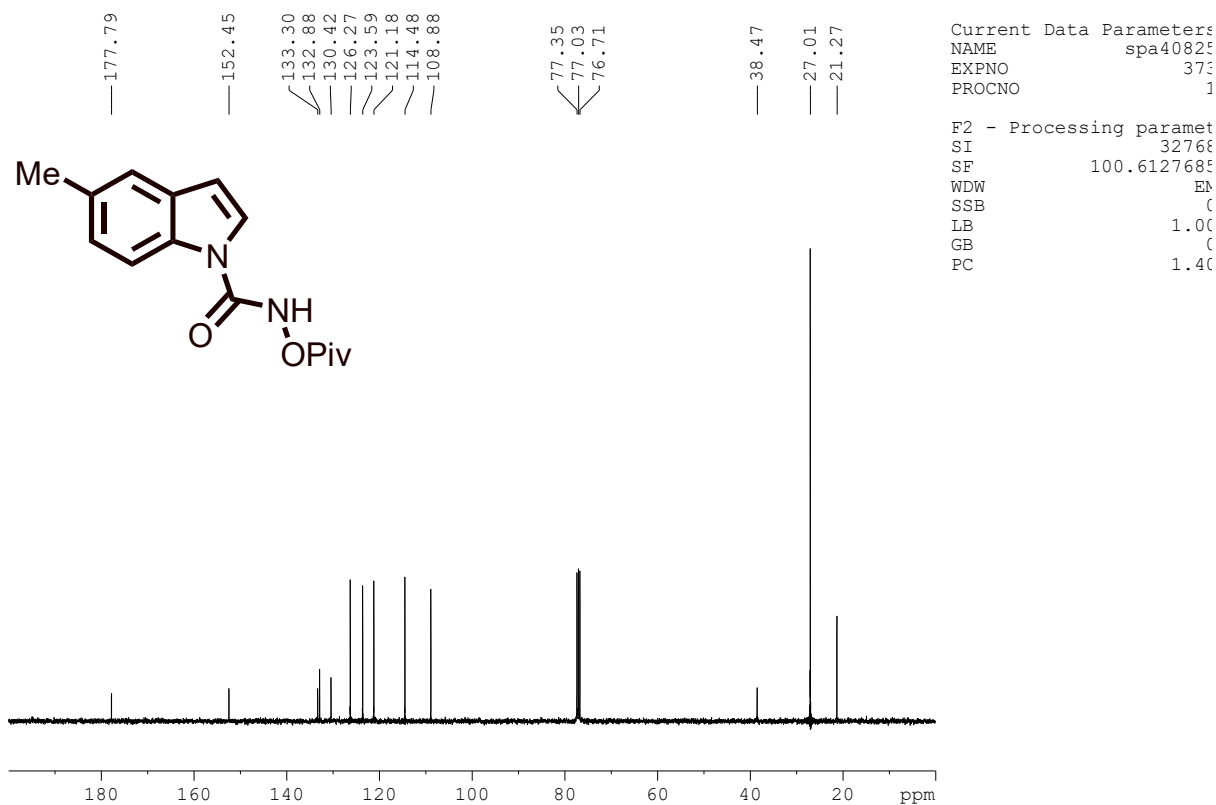

<sup>13</sup>C NMR (100 MHz, CDCl<sub>3</sub>) spectrum of 1c

### 6-methyl-N-(pivaloyloxy)-1H-indole-1-carboxamide (1d)

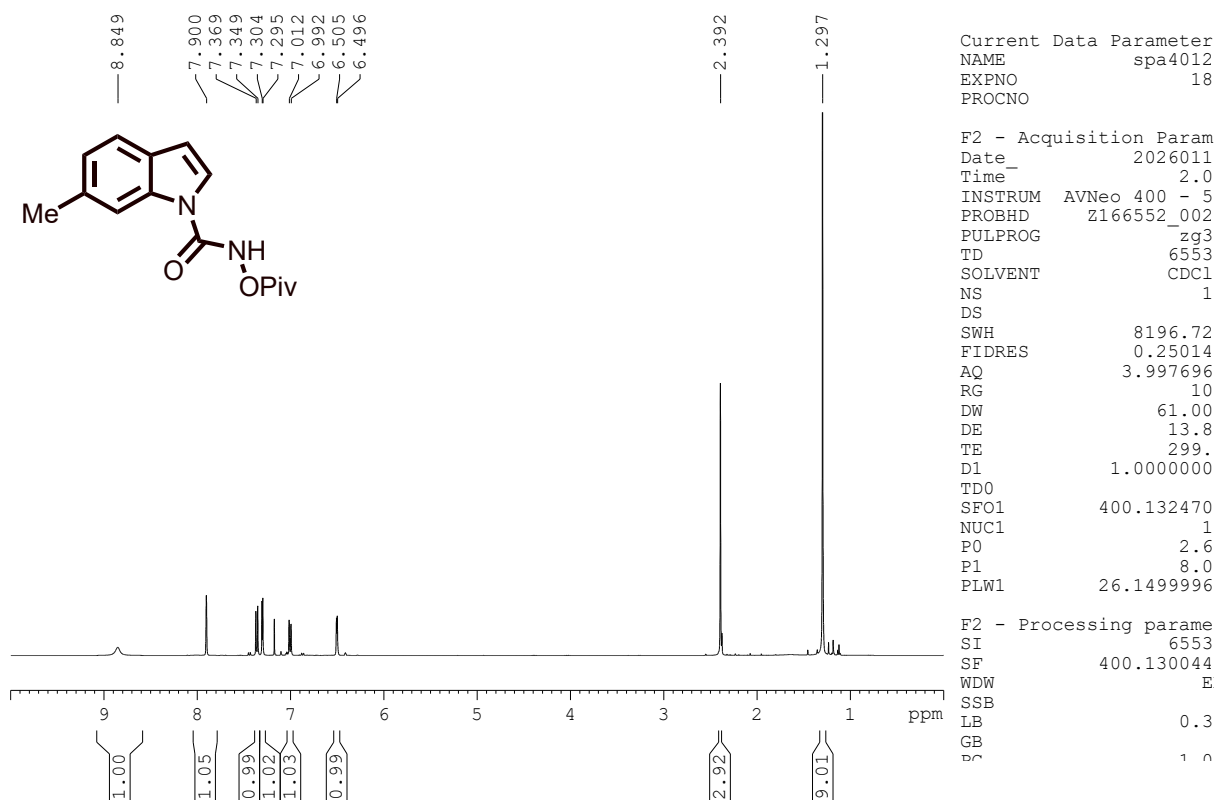

<sup>1</sup>H NMR (400 MHz, CDCl<sub>3</sub>) spectrum of 1d

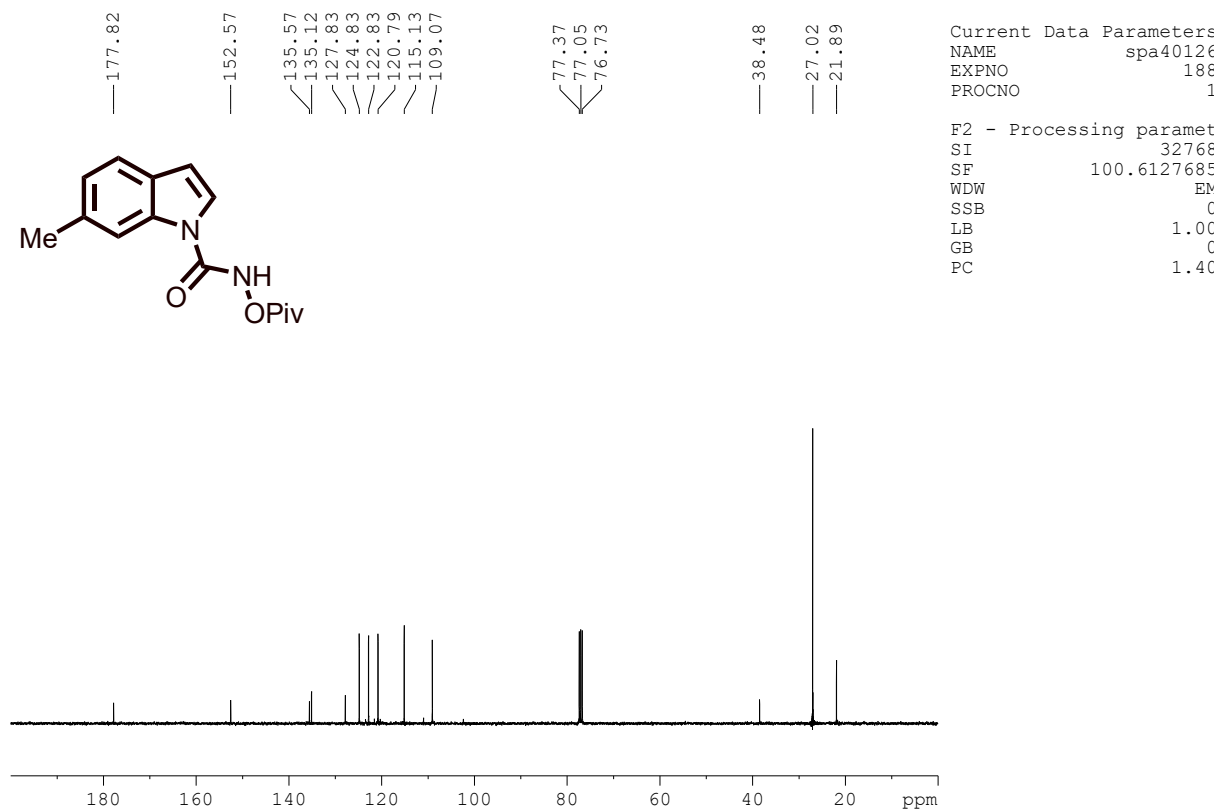

<sup>13</sup>C NMR (100 MHz, CDCl<sub>3</sub>) spectrum of 1d

### 3-methyl-N-(pivaloyloxy)-1H-indole-1-carboxamide (1e)

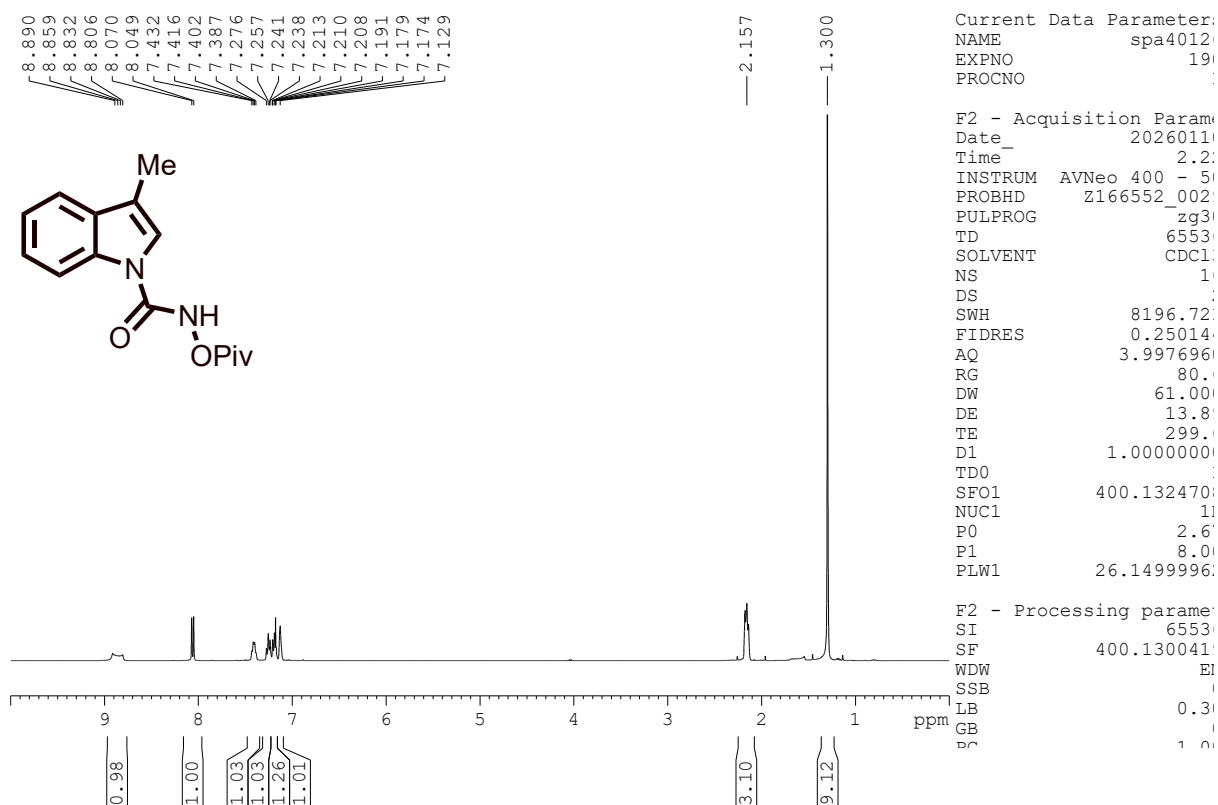

<sup>1</sup>H NMR (400 MHz, CDCl<sub>3</sub>) spectrum of 1e

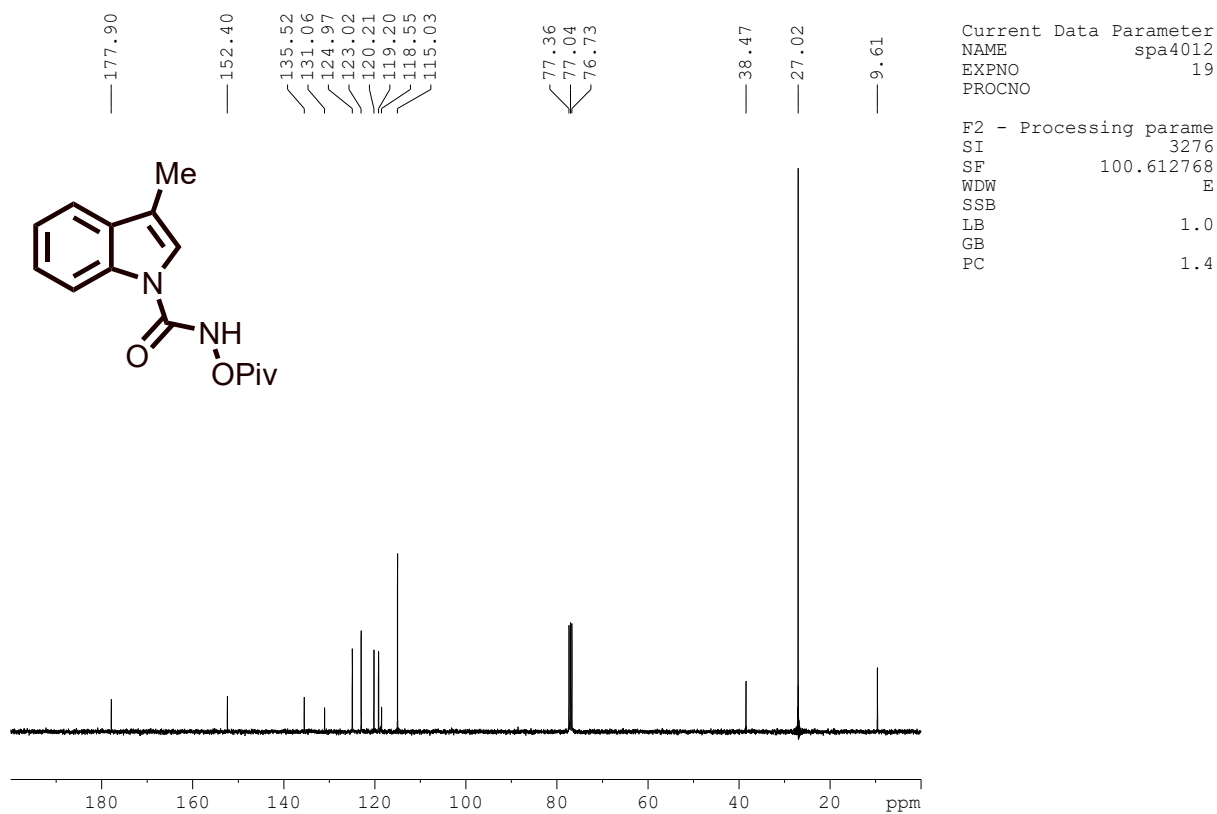

<sup>13</sup>C NMR (100 MHz, CDCl<sub>3</sub>) spectrum of 1e

### 5-methoxy-N-(pivaloyloxy)-1H-indole-1-carboxamide (1f)

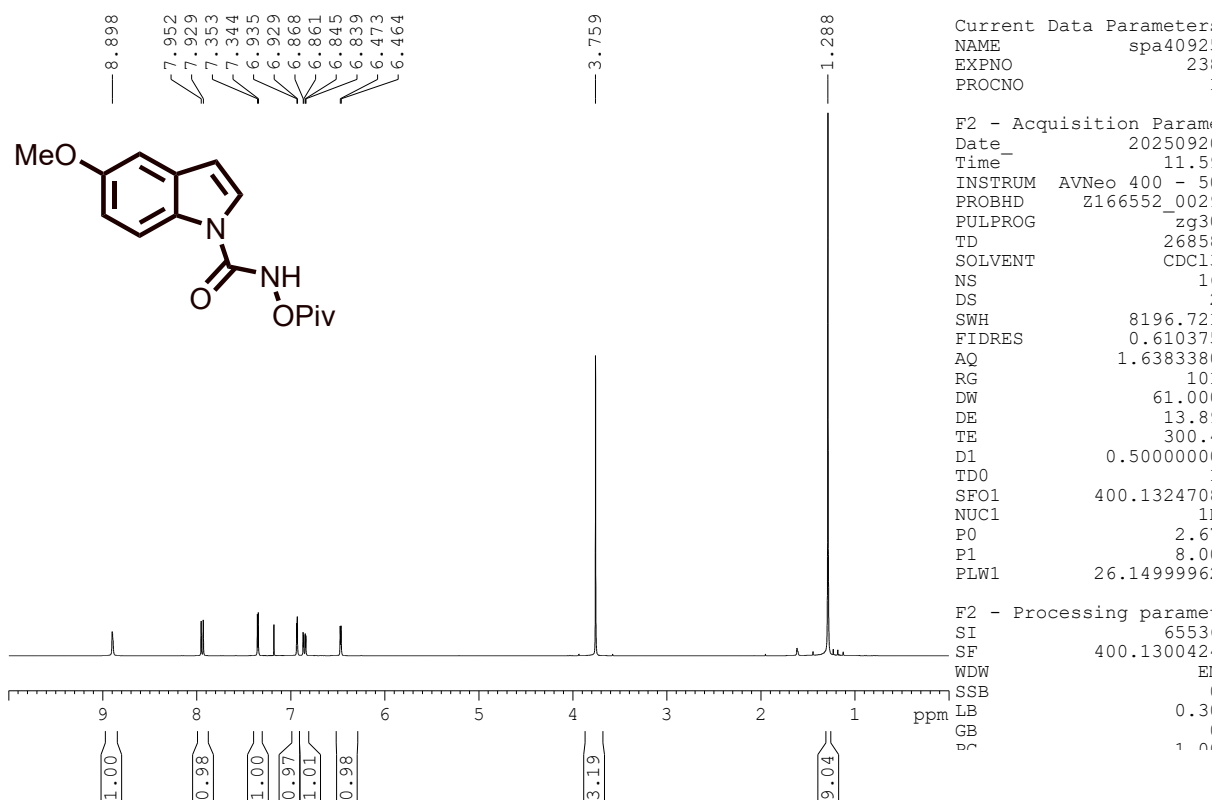

<sup>1</sup>H NMR (400 MHz, CDCl<sub>3</sub>) spectrum of 1f

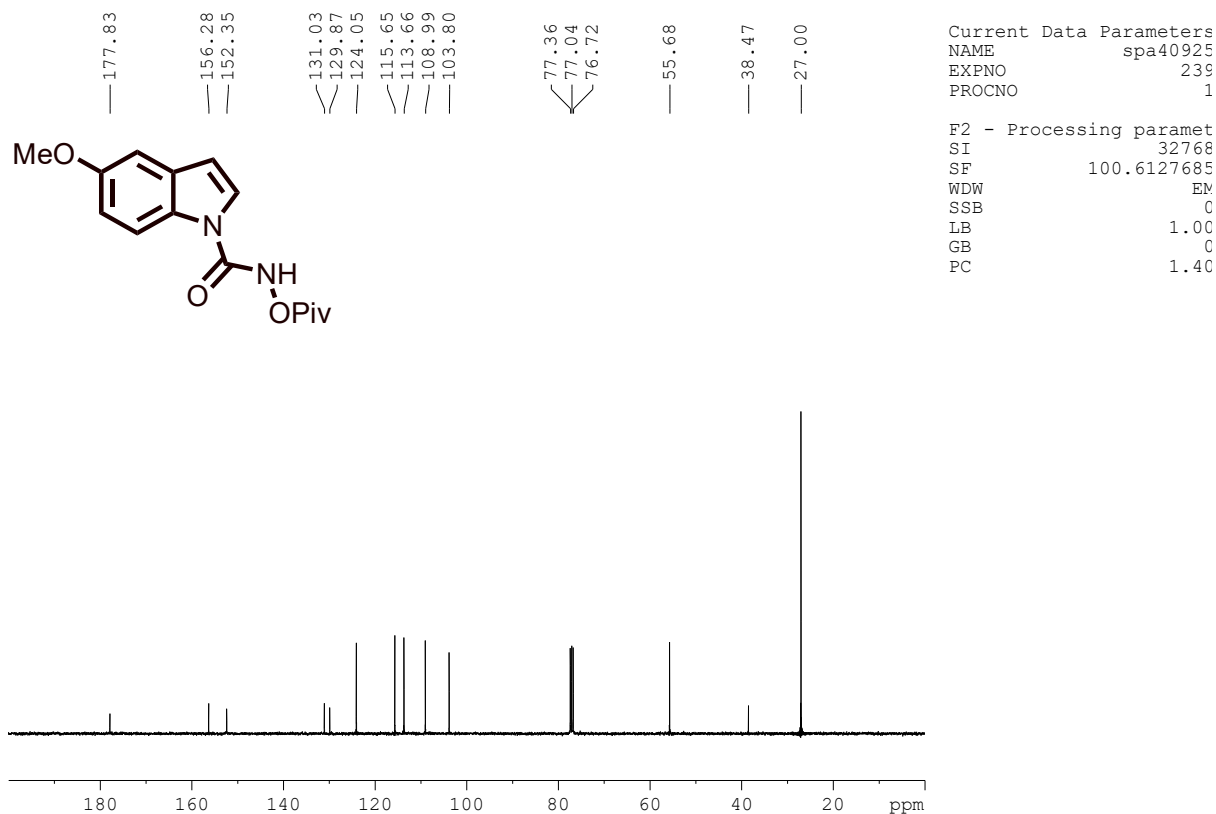

<sup>13</sup>C NMR (100 MHz, CDCl<sub>3</sub>) spectrum of 1f

### 5-fluoro-N-(pivaloyloxy)-1H-indole-1-carboxamide (1g)

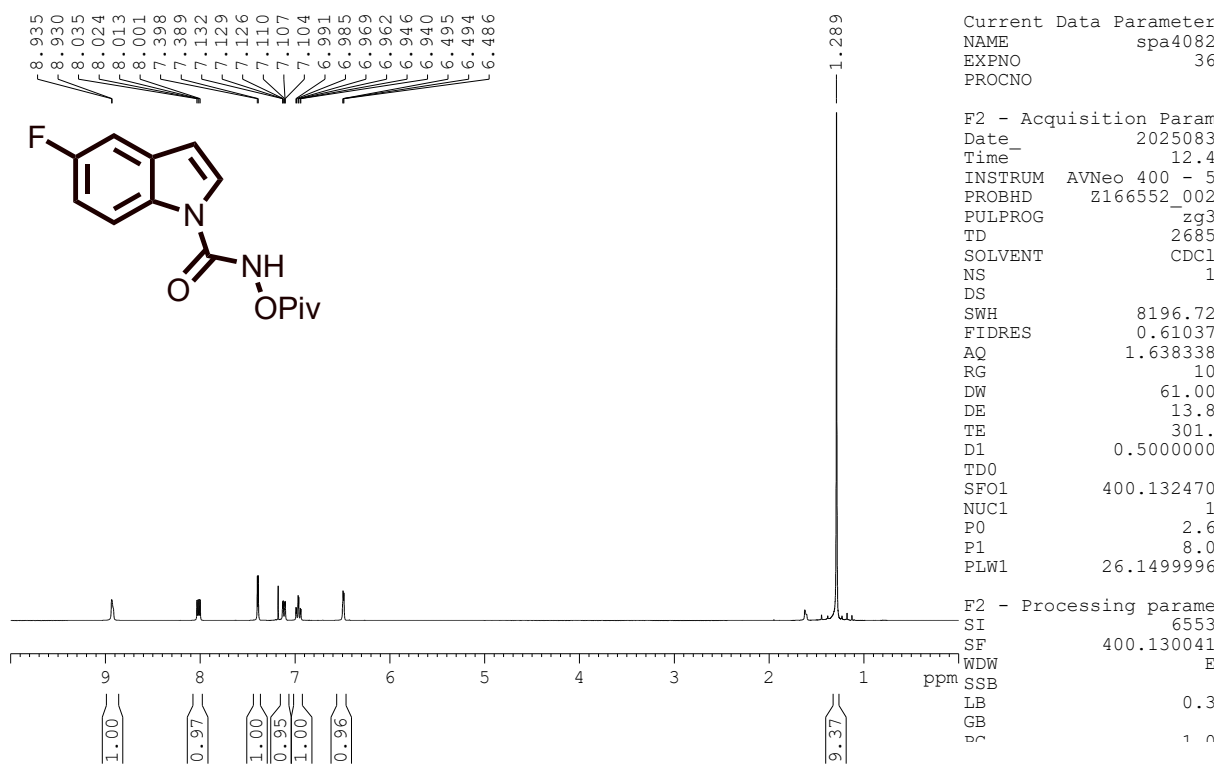

<sup>1</sup>H NMR (400 MHz, CDCl<sub>3</sub>) spectrum of 1g

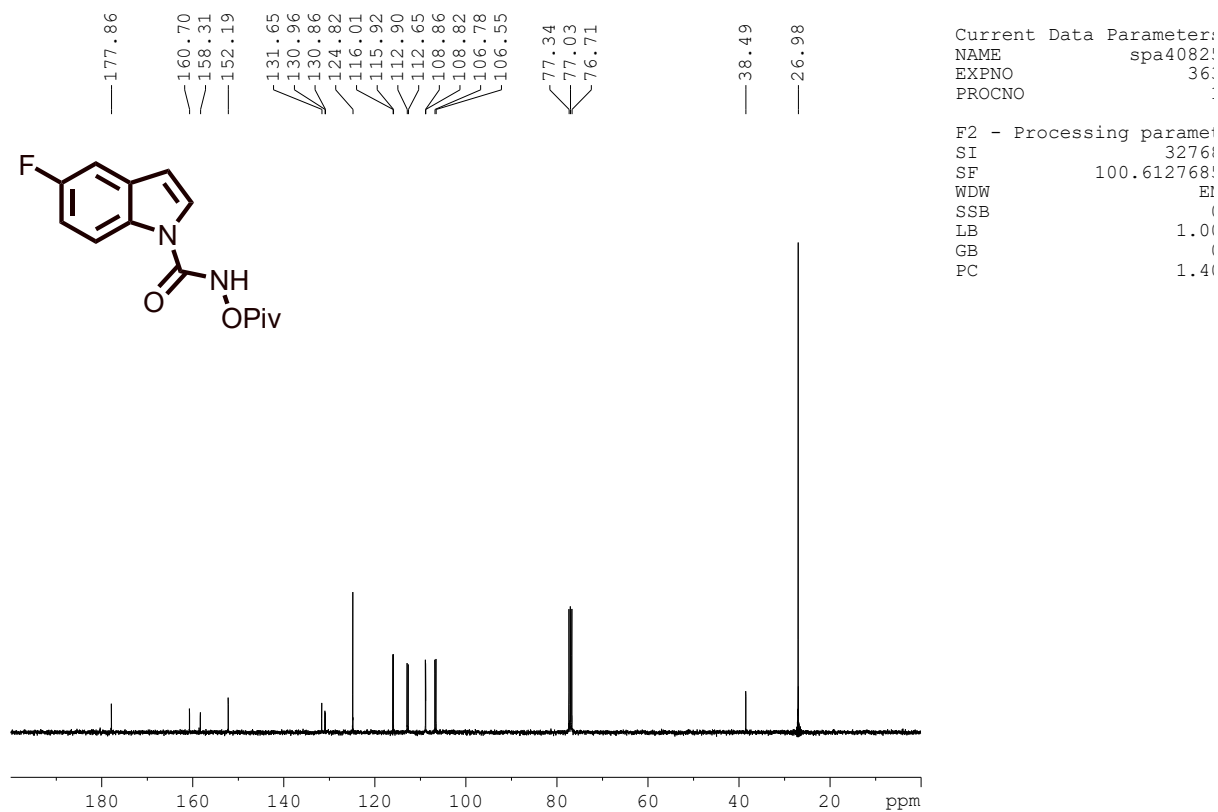

<sup>13</sup>C NMR (100 MHz, CDCl<sub>3</sub>) spectrum of 1g

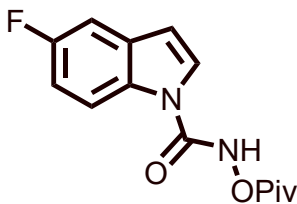

---119.95

Current Data Parameter  
NAME spa4082  
EXPNO 36  
PROCNO

F2 - Processing parame  
SI 6553  
SF 376.498366  
WDW El  
SSB  
LB 0.3  
GB  
PC 1.0

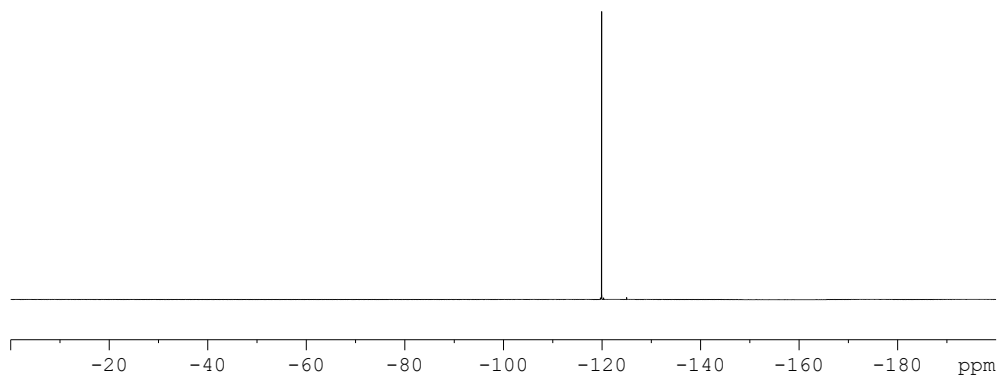

**<sup>19</sup>F NMR (376 MHz, CDCl<sub>3</sub>) spectrum of 1g**

### 5-bromo-N-(pivaloyloxy)-1H-indole-1-carboxamide (1h)

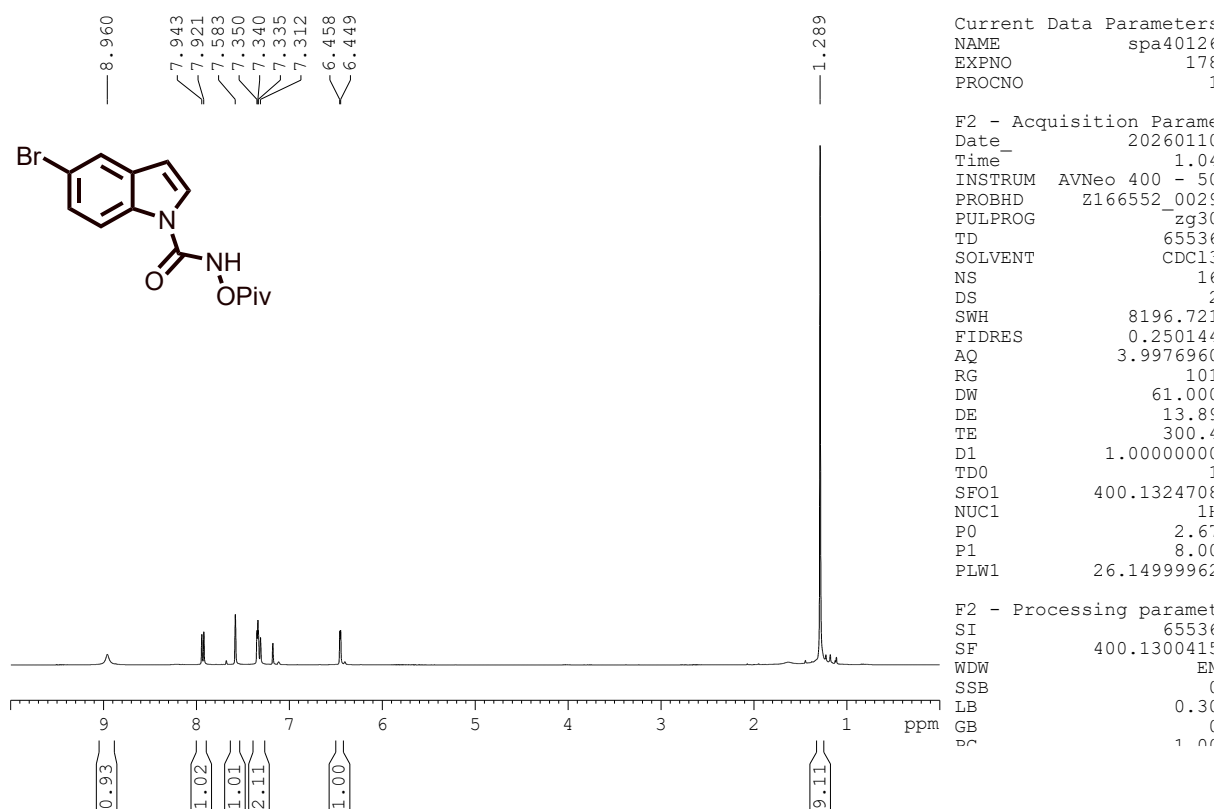

<sup>1</sup>H NMR (400 MHz, CDCl<sub>3</sub>) spectrum of 1h

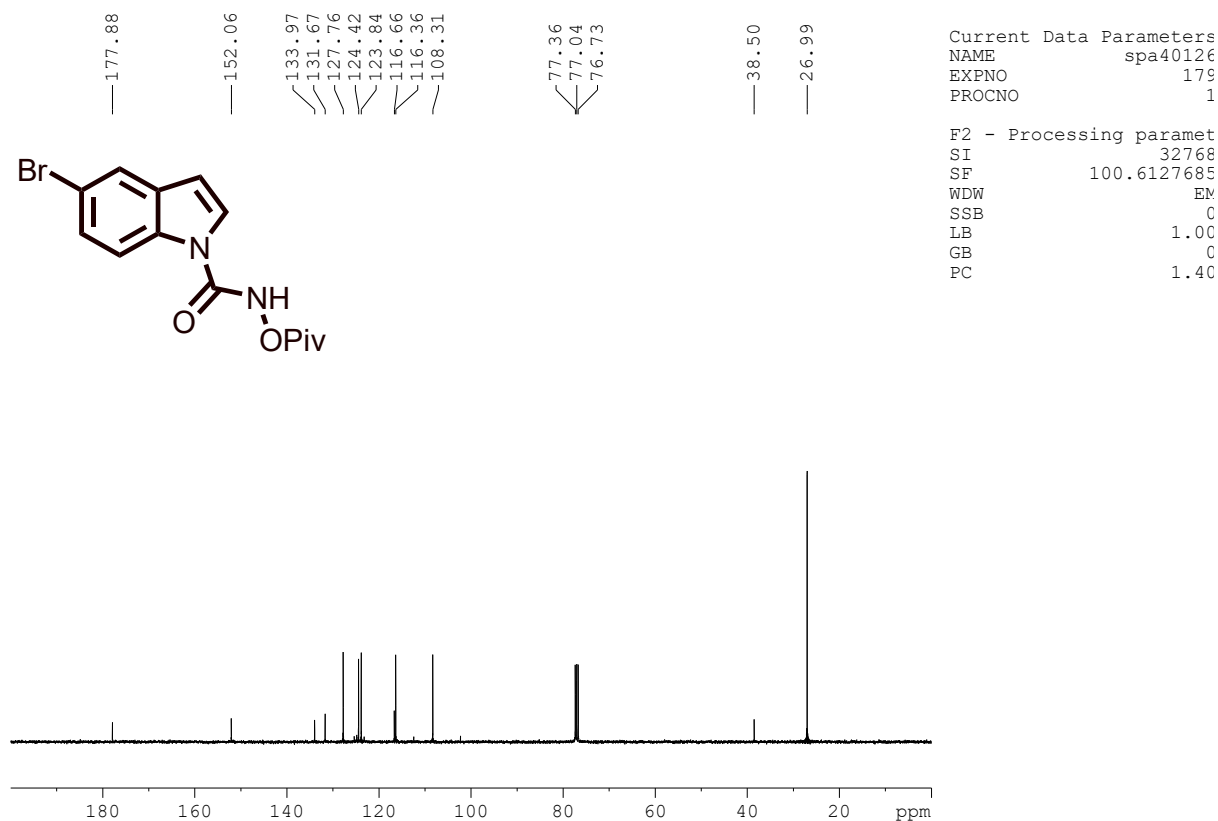

<sup>13</sup>C NMR (100 MHz, CDCl<sub>3</sub>) spectrum of 1h

**6-chloro-N-(pivaloyloxy)-1H-indole-1-carboxamide (1j)**

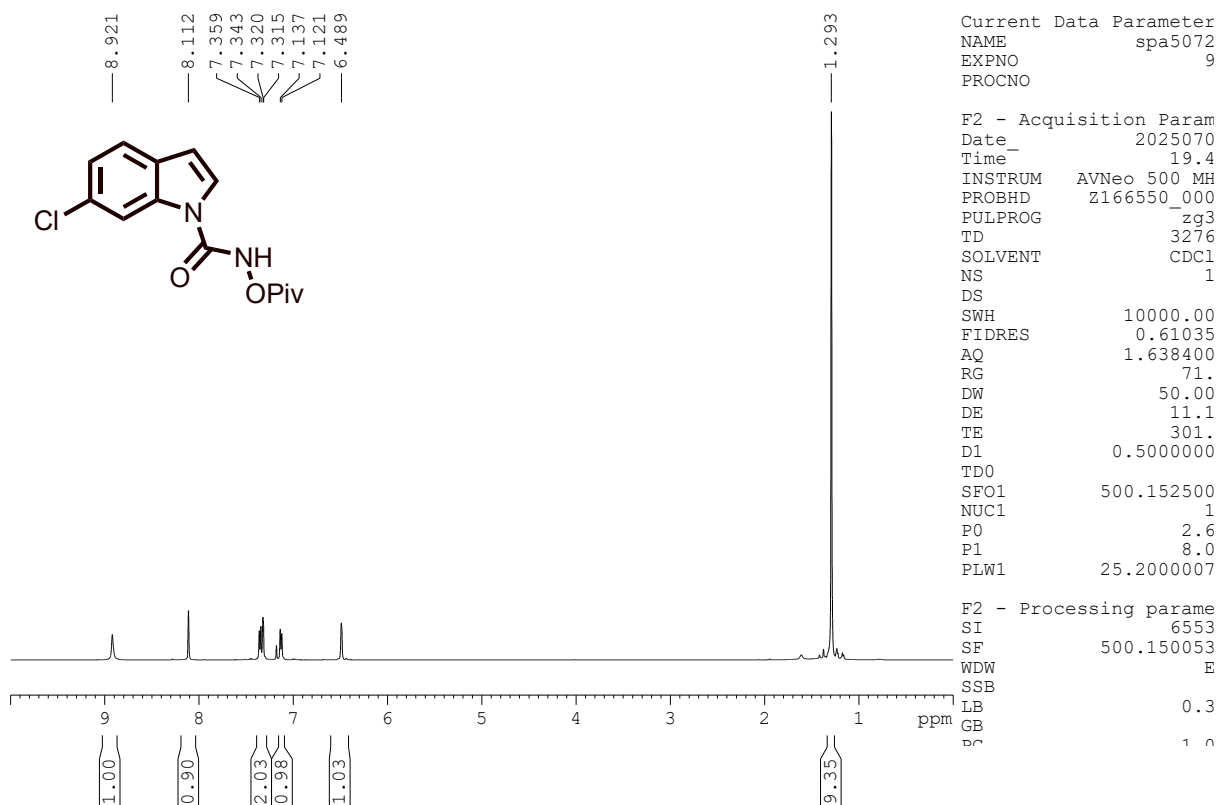

**<sup>1</sup>H NMR (500 MHz, CDCl<sub>3</sub>) spectrum of 1j**

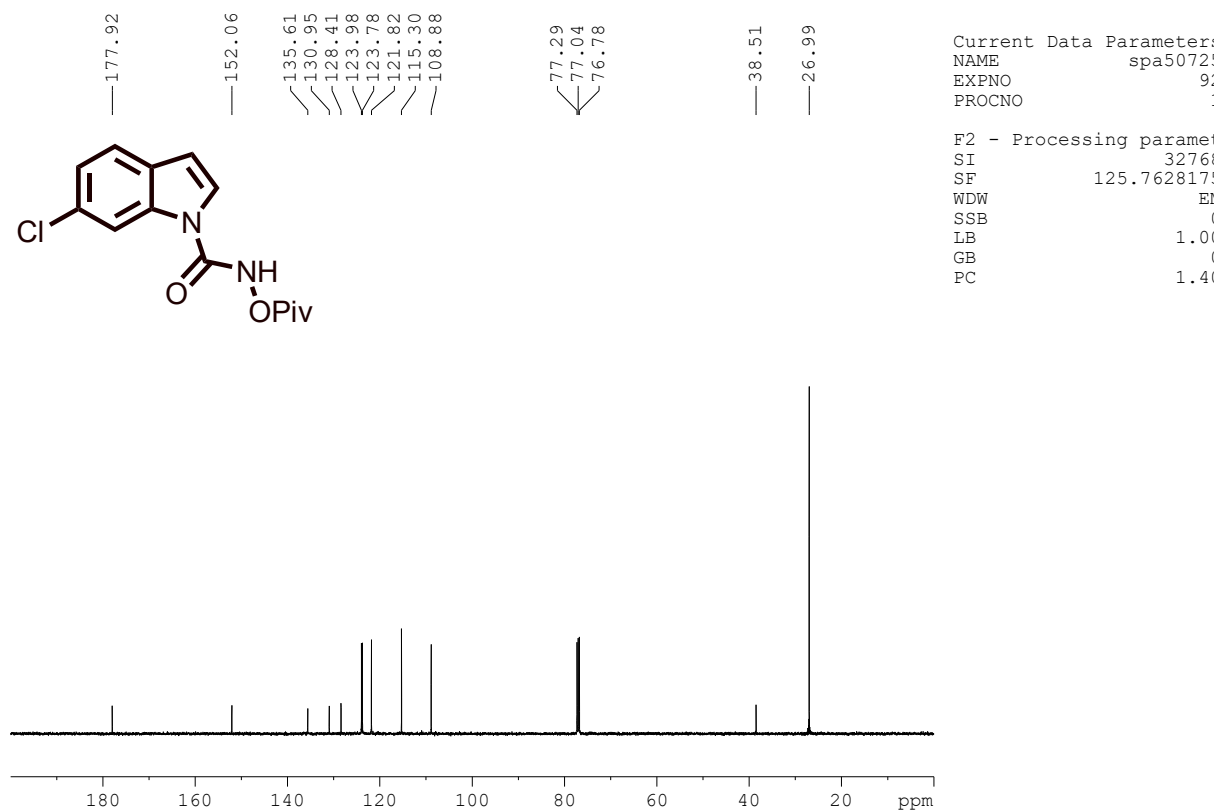

**<sup>13</sup>C NMR (125 MHz, CDCl<sub>3</sub>) spectrum of 1j**

**6-bromo-N-(pivaloyloxy)-1H-indole-1-carboxamide (1k)**

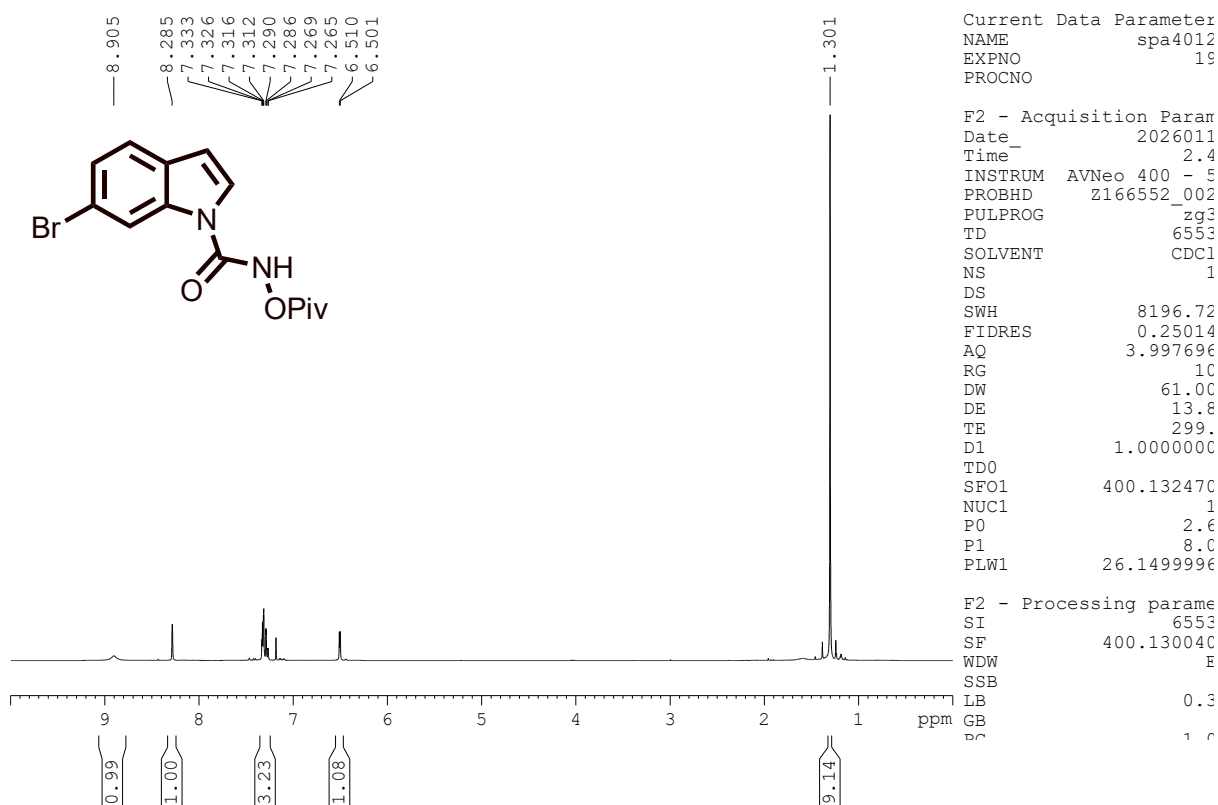

**<sup>1</sup>H NMR (400 MHz, CDCl<sub>3</sub>) spectrum of 1k**

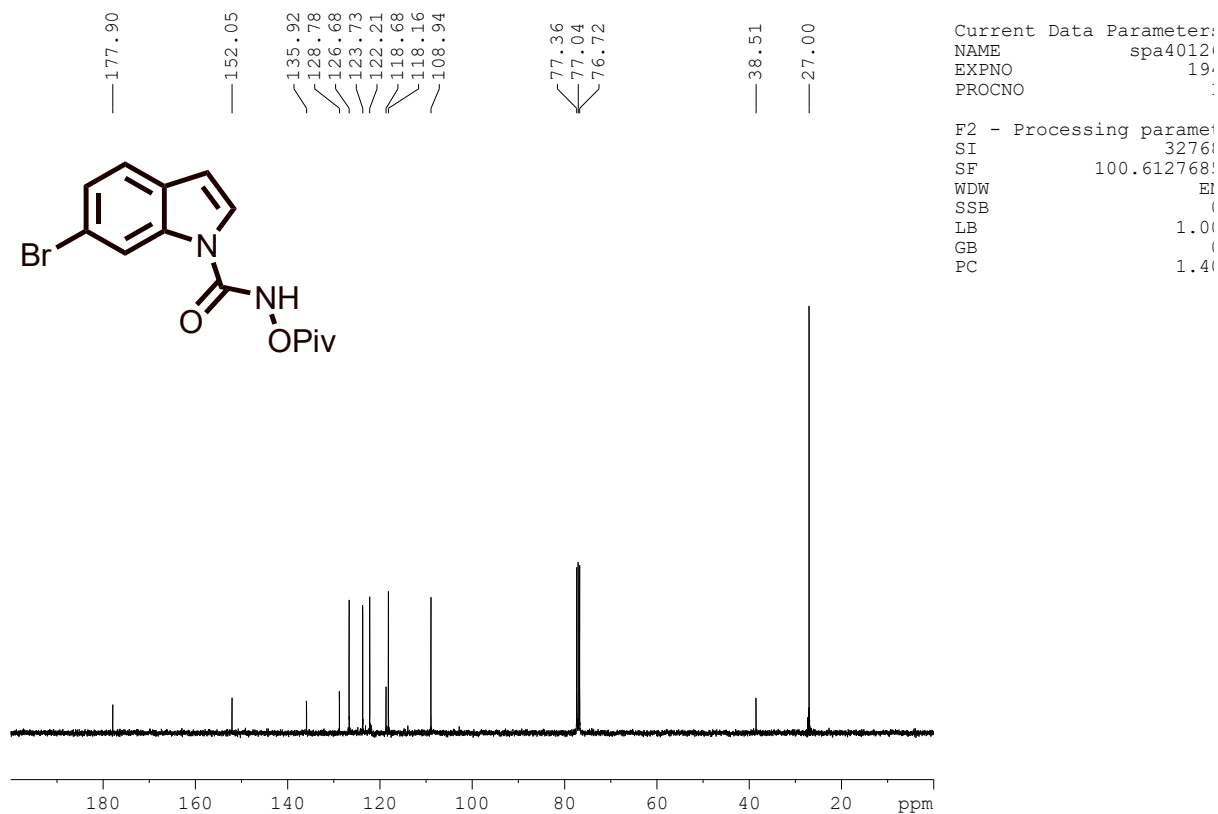

**<sup>13</sup>C NMR (100 MHz, CDCl<sub>3</sub>) spectrum of 1k**

**methyl 1-((pivaloyloxy)carbamoyl)-1H-indole-5-carboxylate (11)**

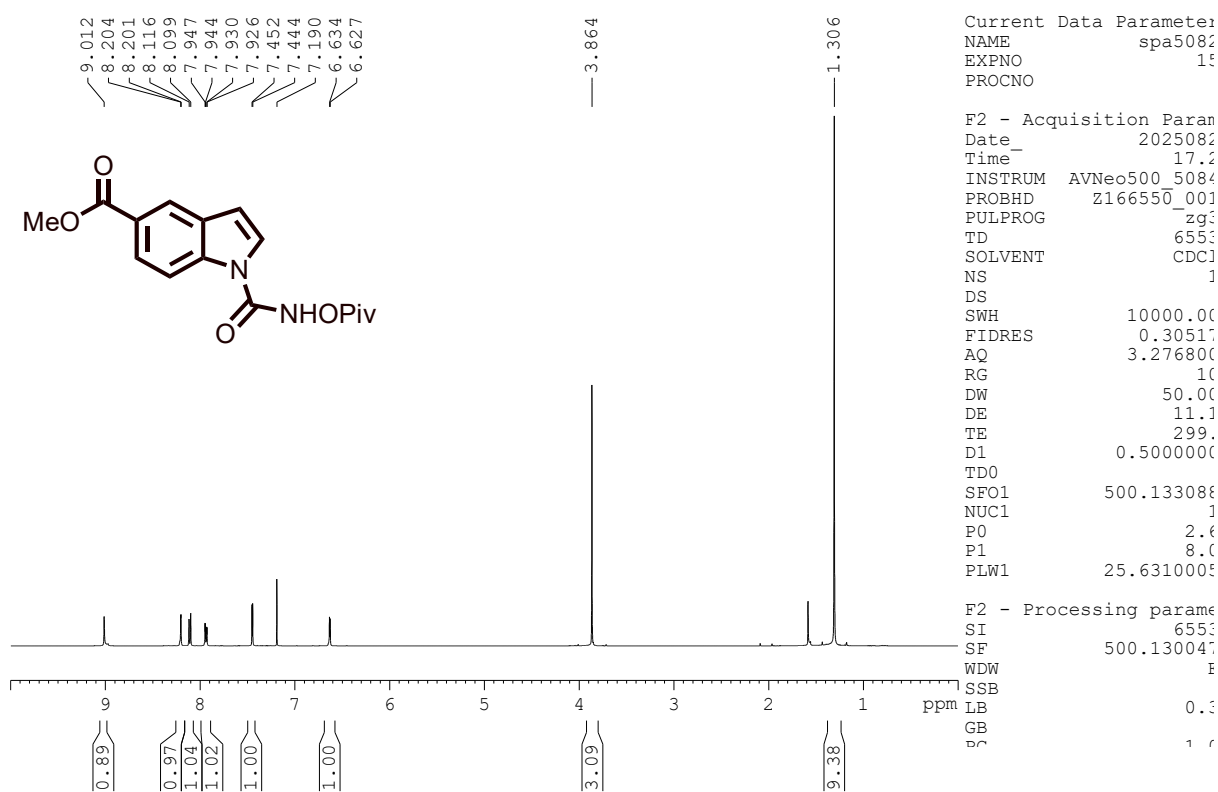

**<sup>1</sup>H NMR (500 MHz, CDCl<sub>3</sub>) spectrum of 11**

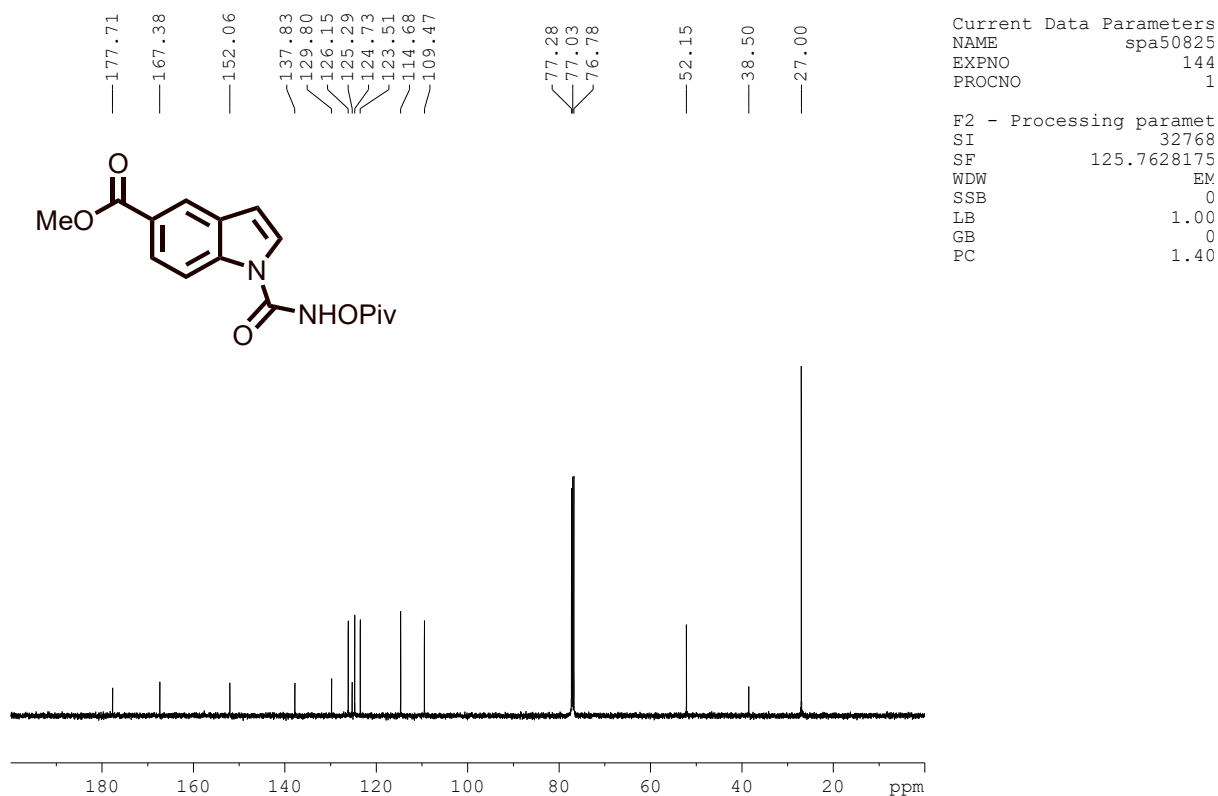

**<sup>13</sup>C NMR (125 MHz, CDCl<sub>3</sub>) spectrum of 11**

**(S)-1-(2,2-diphenylvinyl)-1,2-dihydro-3H-imidazo[1,5-a]indol-3-one (3a)**

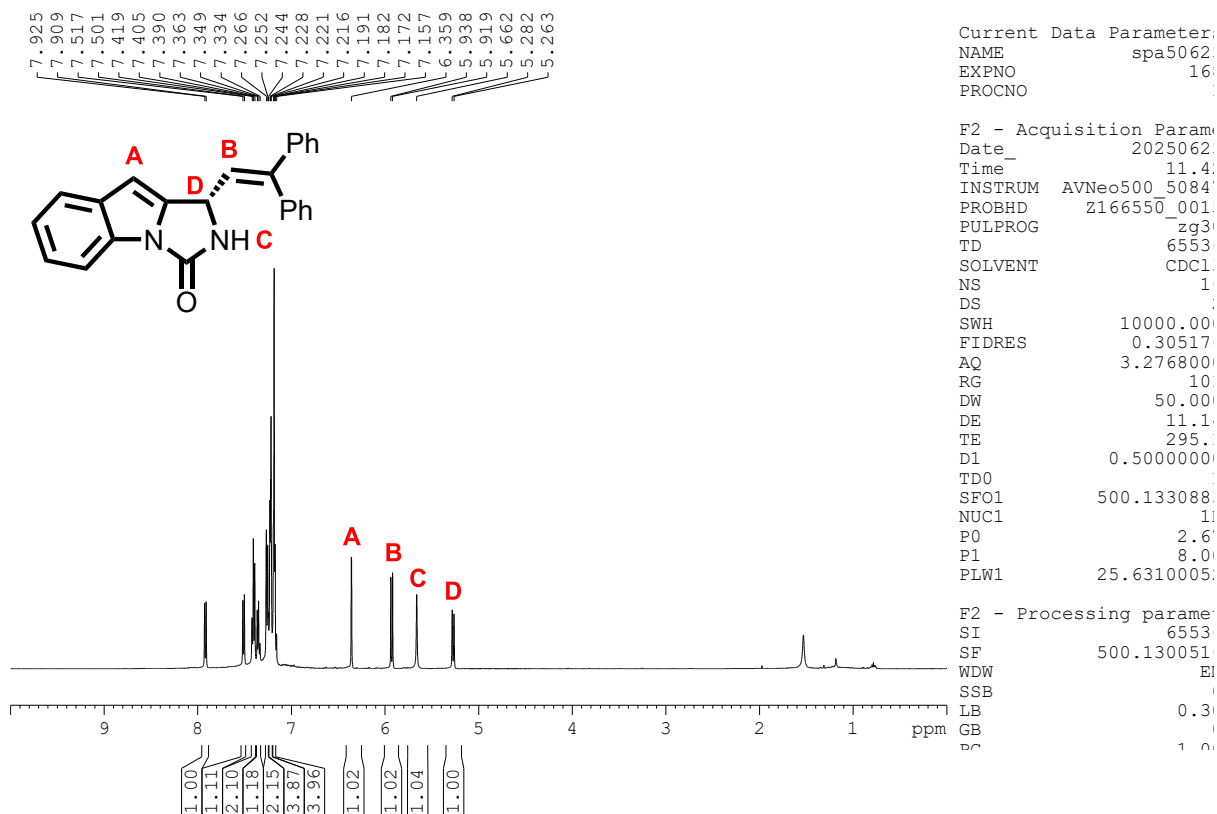

**<sup>1</sup>H NMR (500 MHz, CDCl<sub>3</sub>) spectrum of 3a**

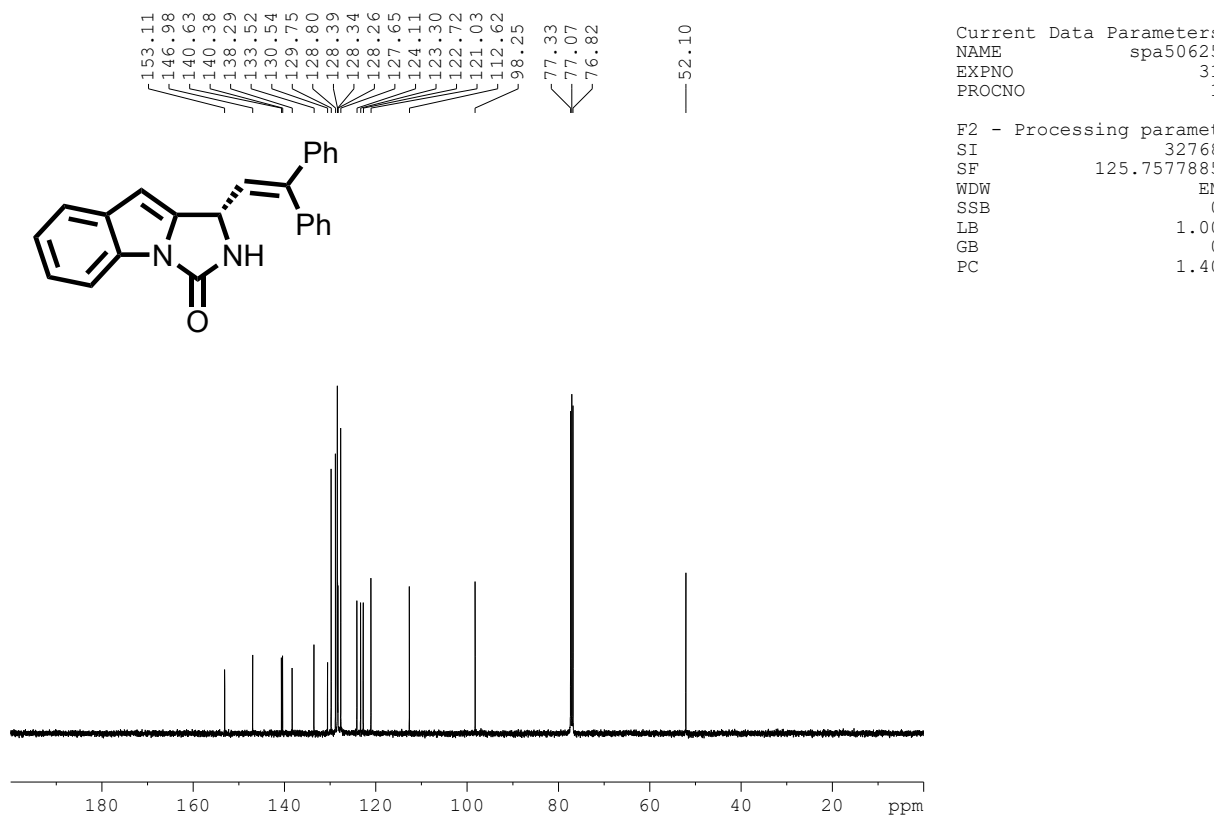

**<sup>13</sup>C NMR (125 MHz, CDCl<sub>3</sub>) spectrum of 3a**

**(S)-1-(2,2-diphenylvinyl)-8-methyl-1,2-dihydro-3H-imidazo[1,5-a]indol-3-one (3b)**

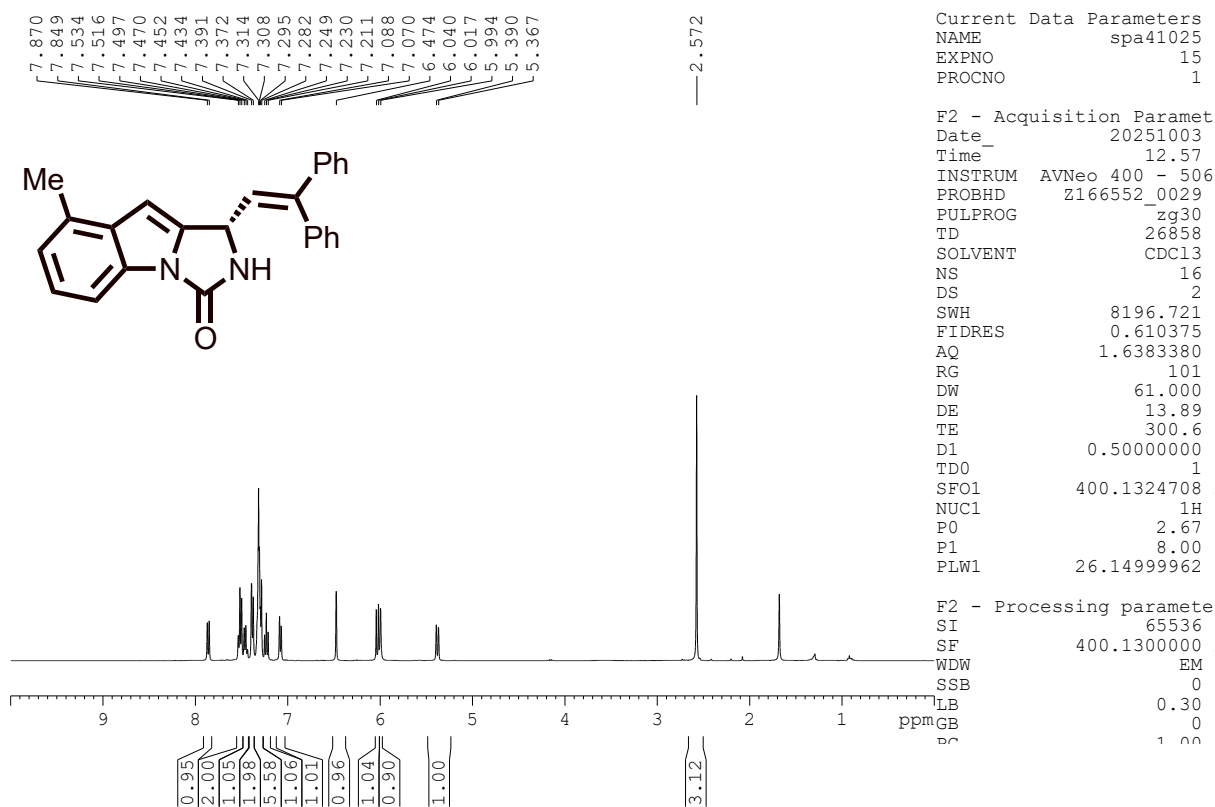

**<sup>1</sup>H NMR (400 MHz, CDCl<sub>3</sub>) spectrum of 3b**

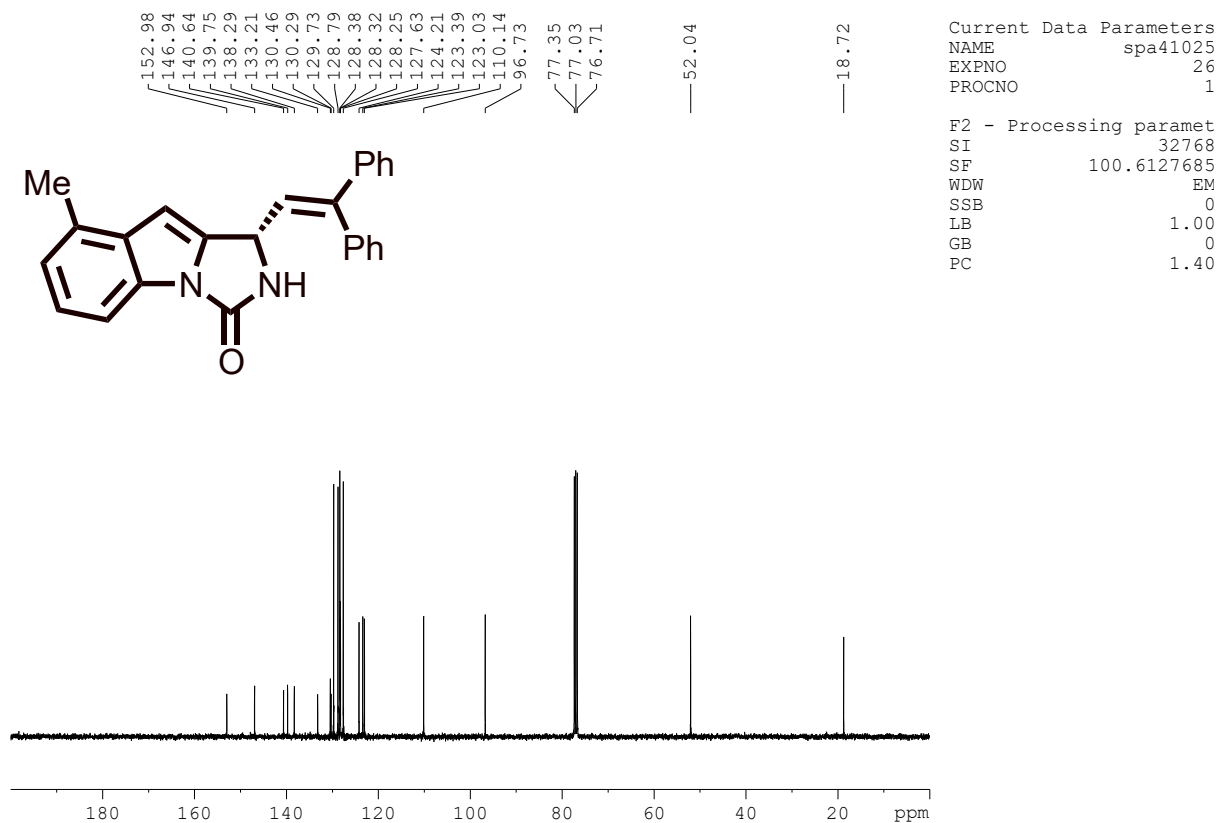

**<sup>13</sup>C NMR (100 MHz, CDCl<sub>3</sub>) spectrum of 3b**

**(S)-1-(2,2-diphenylvinyl)-7-methyl-1,2-dihydro-3H-imidazo[1,5-a]indol-3-one (3c)**

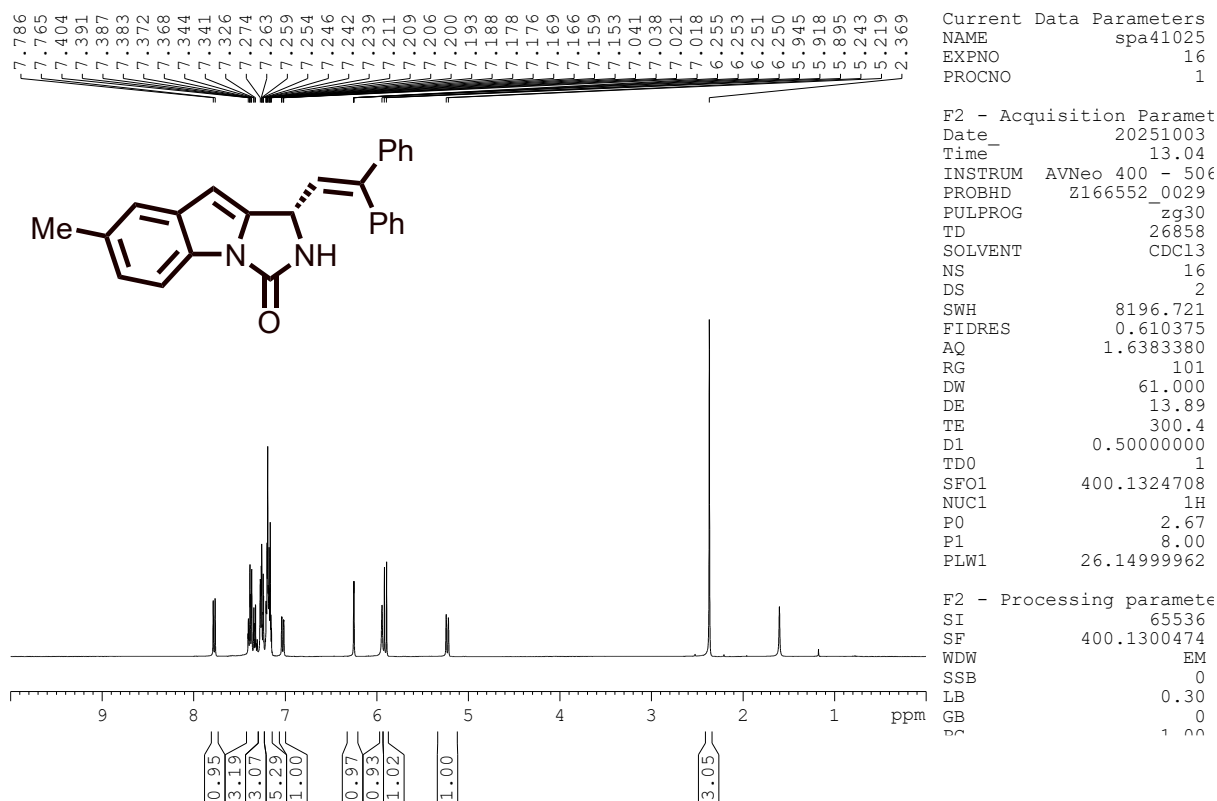

**<sup>1</sup>H NMR (400 MHz, CDCl<sub>3</sub>) spectrum of 3c**

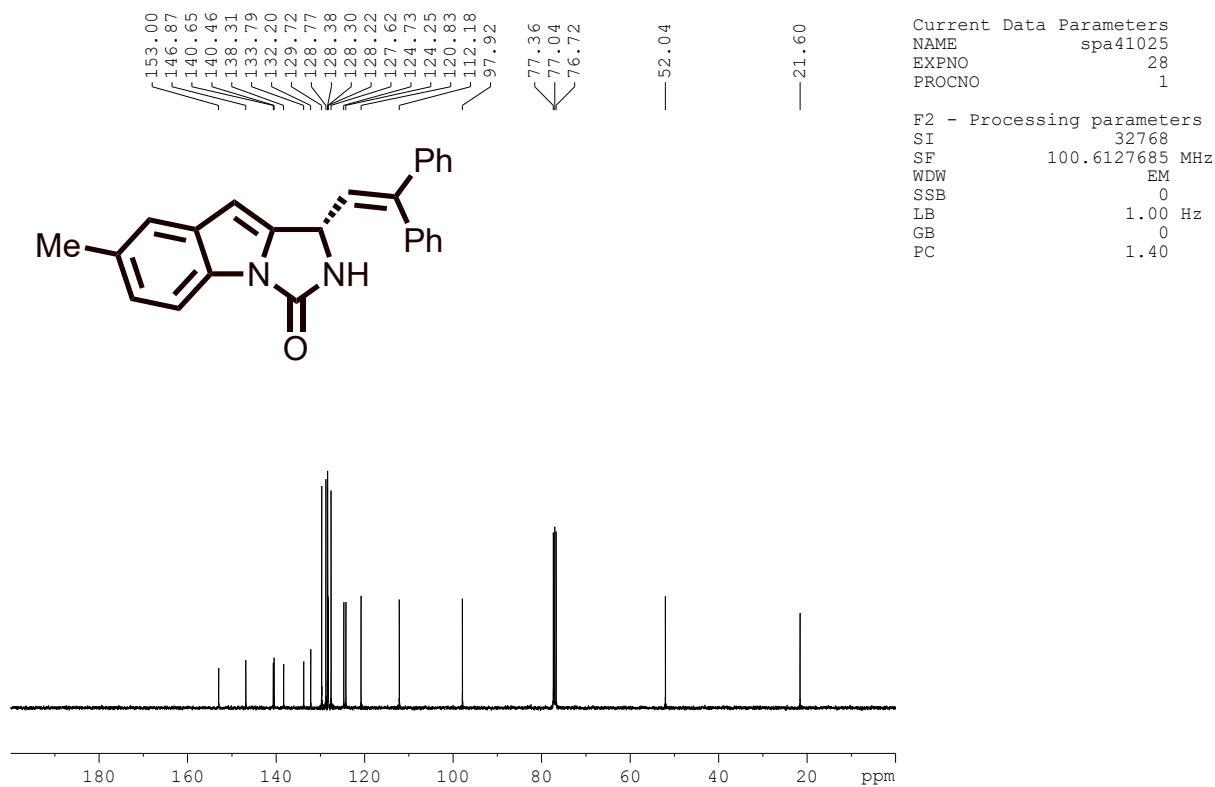

**<sup>13</sup>C NMR (100 MHz, CDCl<sub>3</sub>) spectrum of 3c**

**(S)-1-(2,2-diphenylvinyl)-6-methyl-1,2-dihydro-3H-imidazo[1,5-a]indol-3-one (3d)**

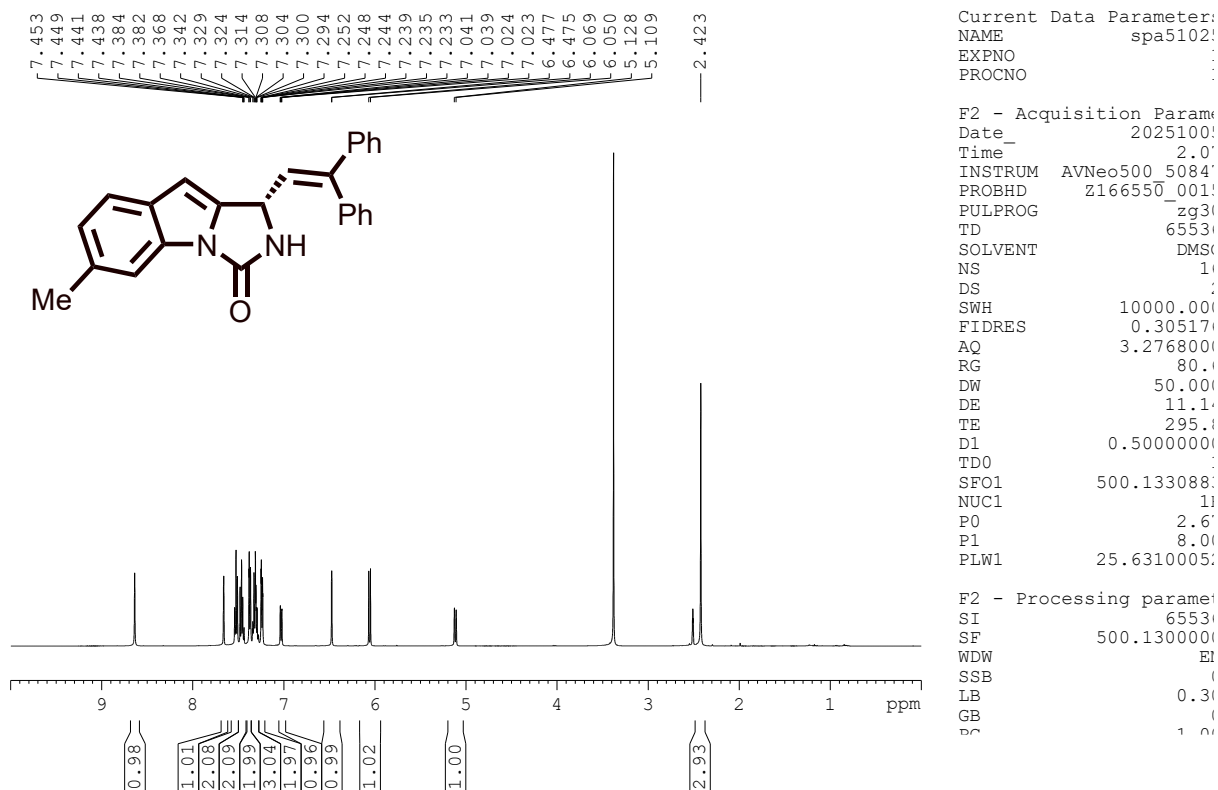

**<sup>1</sup>H NMR (500 MHz, DMSO-*d*<sub>6</sub>) spectrum of 3d**

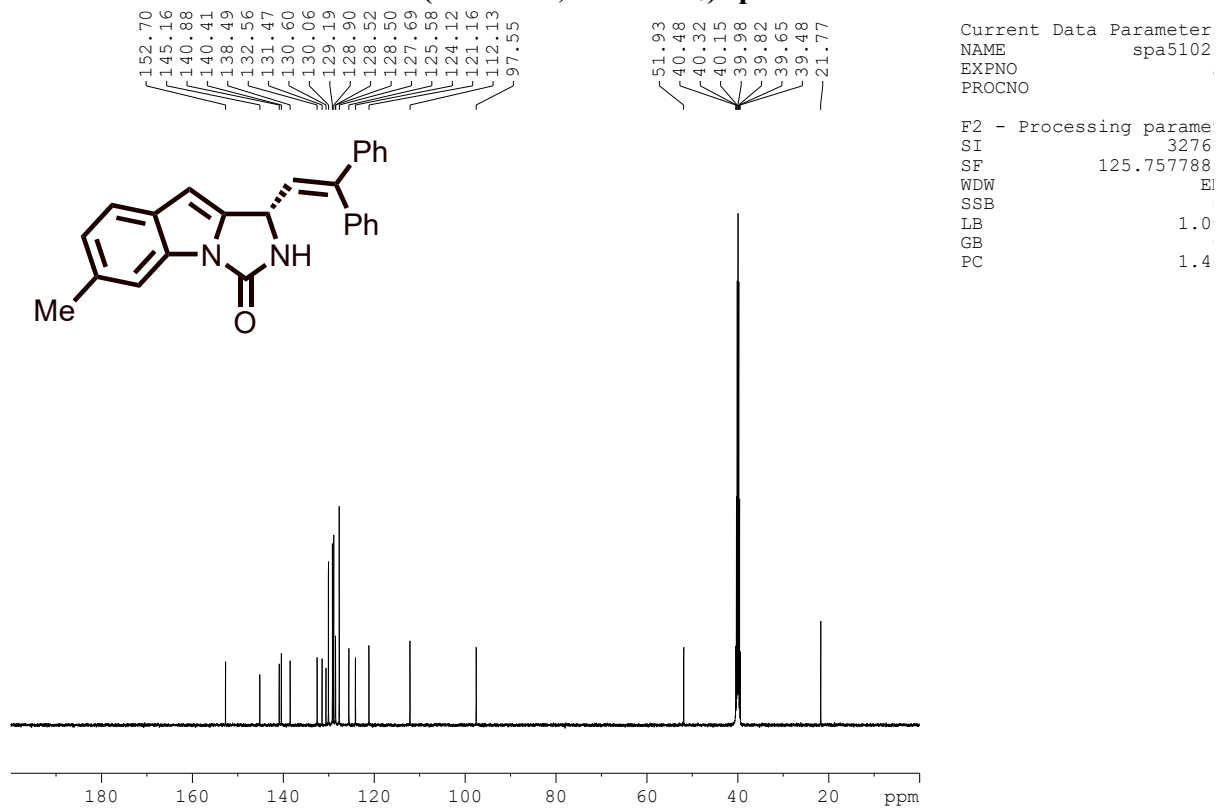

**<sup>13</sup>C NMR (125 MHz, DMSO-*d*<sub>6</sub>) spectrum of 3d**

**(S)-1-(2,2-diphenylvinyl)-9-methyl-1,2-dihydro-3H-imidazo[1,5-a]indol-3-one (3e)**

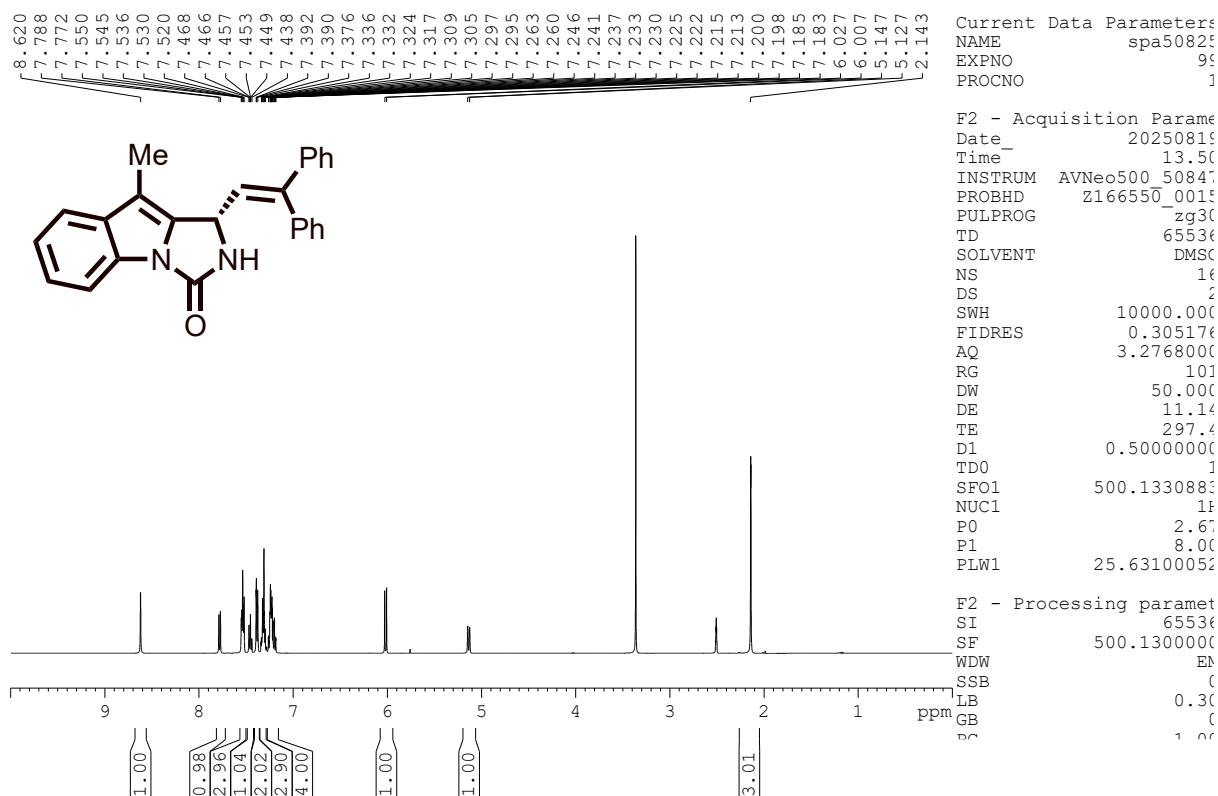

**<sup>1</sup>H NMR (500 MHz, DMSO-*d*<sub>6</sub>) spectrum of 3e**

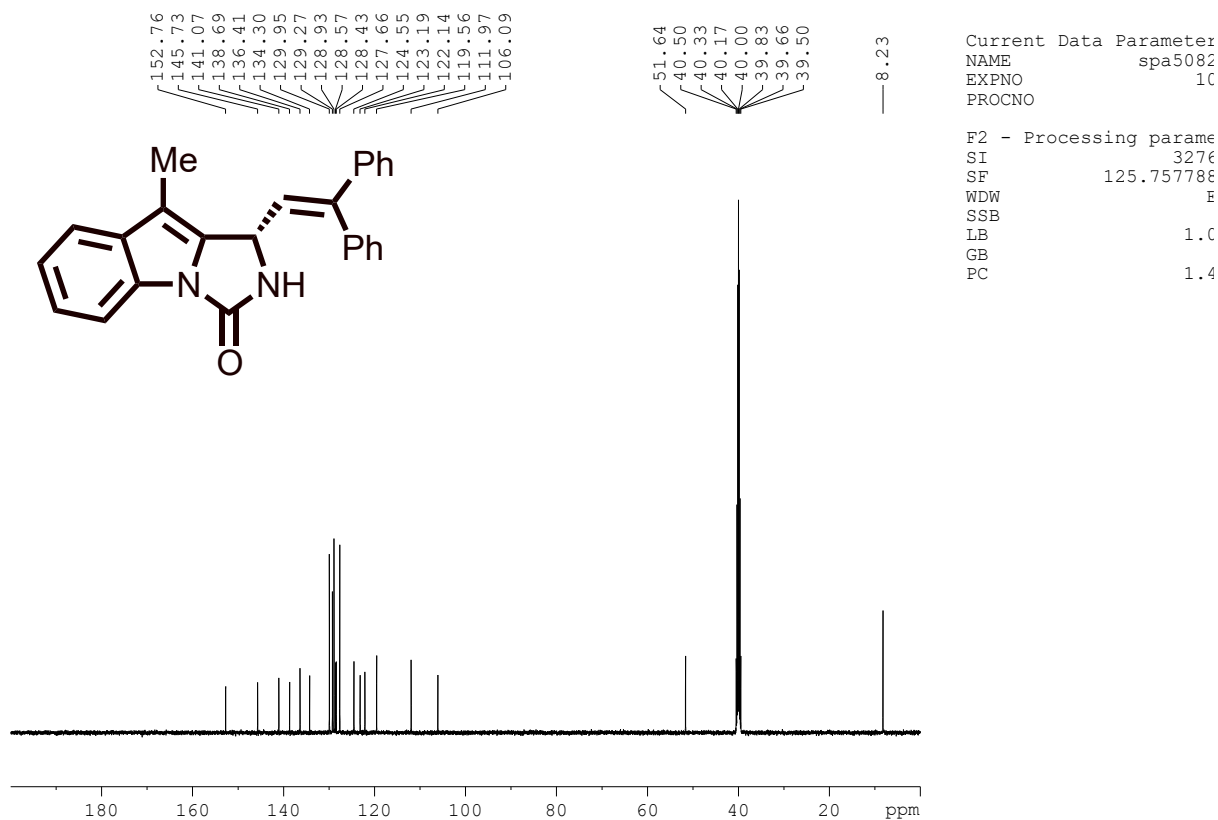

**<sup>13</sup>C NMR (125 MHz, DMSO-*d*<sub>6</sub>) spectrum of 3e**

**(S)-1-(2,2-diphenylvinyl)-7-methoxy-1,2-dihydro-3H-imidazo[1,5-a]indol-3-one (3f)**

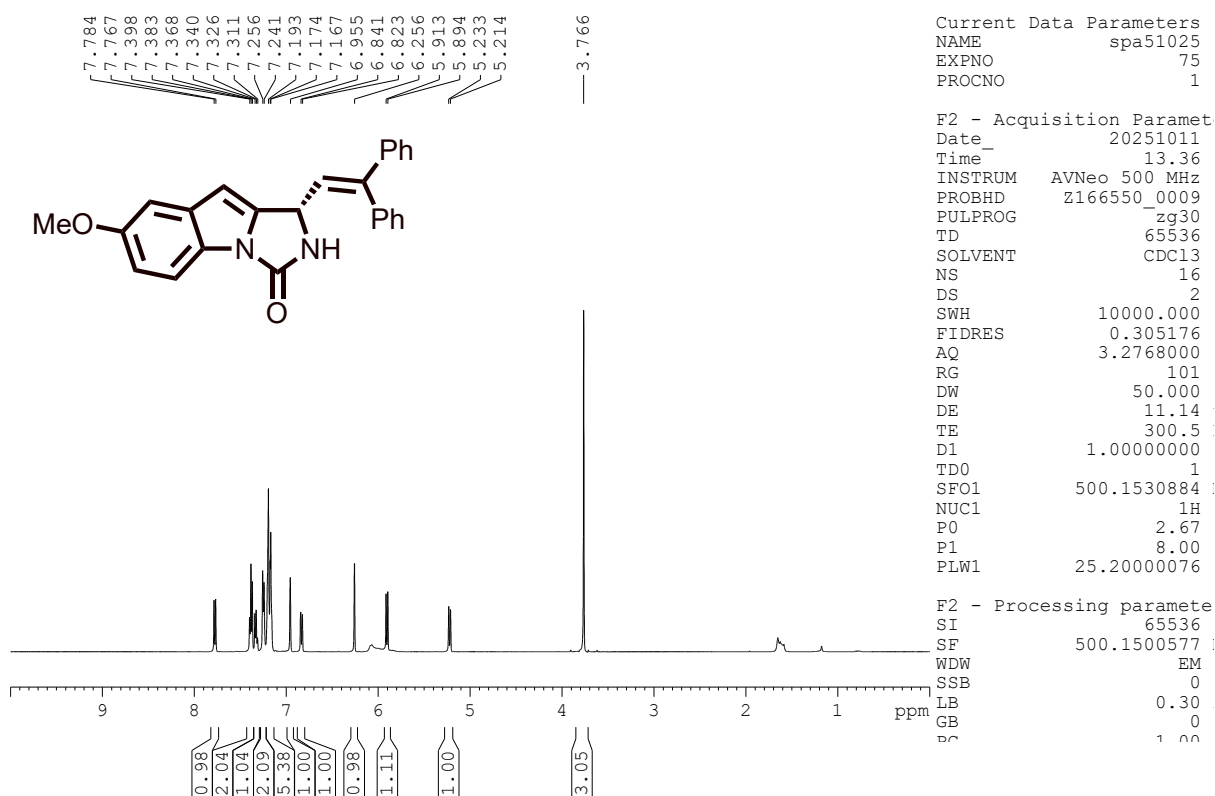

**<sup>1</sup>H NMR (500 MHz, CDCl<sub>3</sub>) spectrum of 3f**

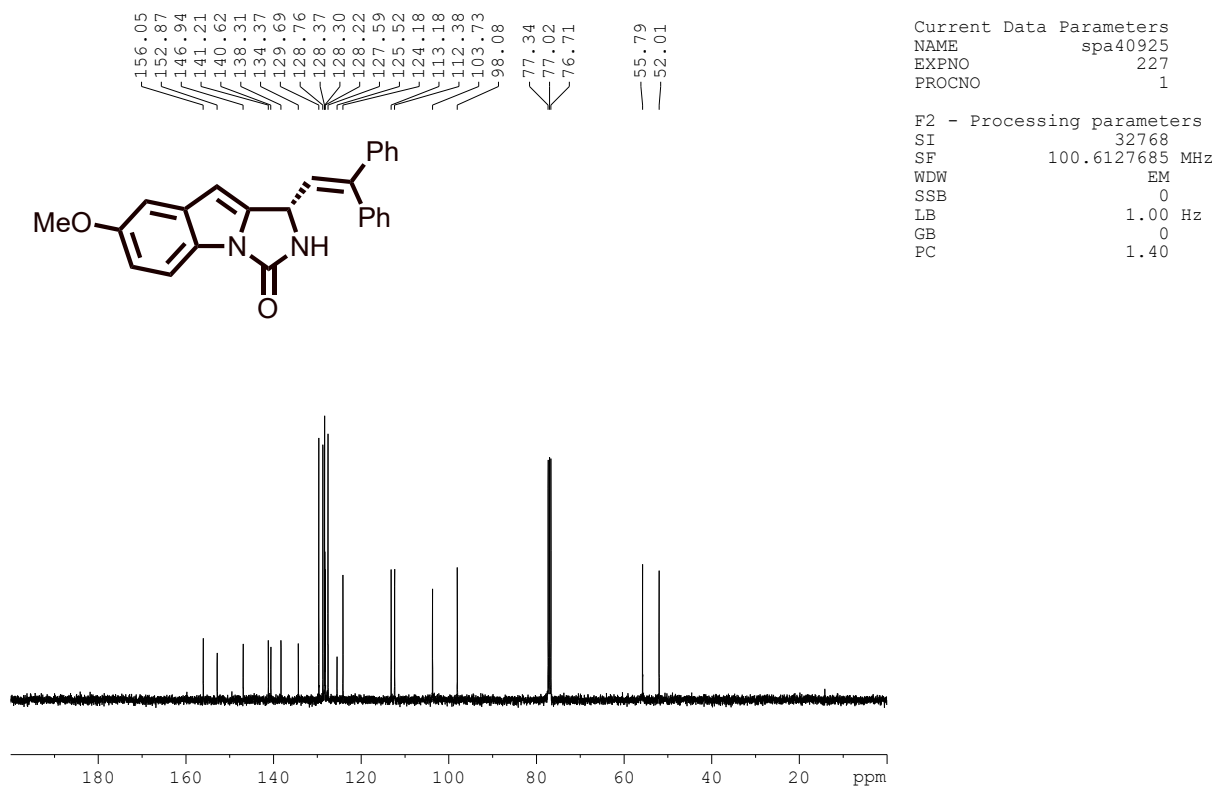

**<sup>13</sup>C NMR (100 MHz, CDCl<sub>3</sub>) spectrum of 3f**

**(S)-1-(2,2-diphenylvinyl)-7-fluoro-1,2-dihydro-3H-imidazo[1,5-a]indol-3-one (3g)**

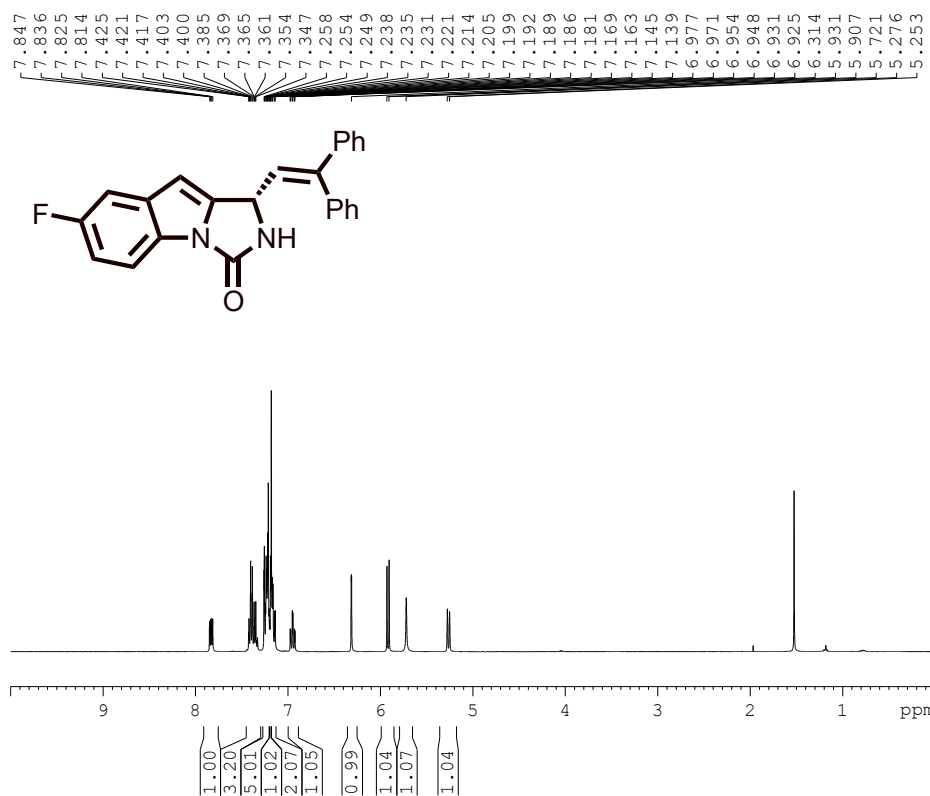

Current Data Parameter  
NAME spa4092  
EXPNO 23  
PROCNO

F2 - Acquisition Param  
Date\_ 2025092  
Time\_ 11.5  
INSTRUM AVNeo 400 - 5  
PROBHD Z166552\_002  
PULPROG zg3  
TD 2688  
SOLVENT CDCl  
NS 1  
DS  
SWH 8196.72  
FIDRES 0.61037  
AQ 1.638338  
RG 10  
DW 61.00  
DE 13.8  
TE 300.  
D1 0.500000C  
TD0  
SF01 400.132470  
NUC1 1  
P0 2.6  
P1 8.0  
PLW1 26.1499996

F2 - Processing param  
SI 6553  
SF 400.130040  
WDW E  
SSB  
LB 0.3  
GB  
PC 1.0

**<sup>1</sup>H NMR (400 MHz, CDCl<sub>3</sub>) spectrum of 3g**

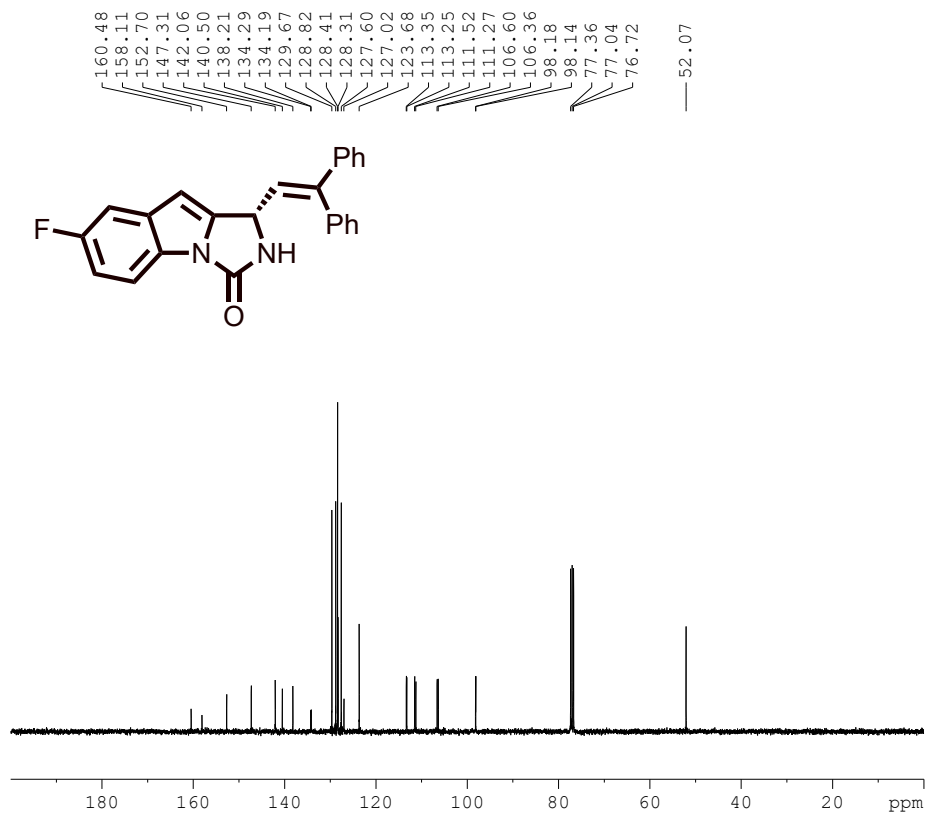

Current Data Parameter  
NAME spa4092  
EXPNO 23  
PROCNO

F2 - Processing param  
SI 3276  
SF 100.612768  
WDW E  
SSB  
LB 1.0  
GB  
PC 1.4

**<sup>13</sup>C NMR (100 MHz, CDCl<sub>3</sub>) spectrum of 3g**

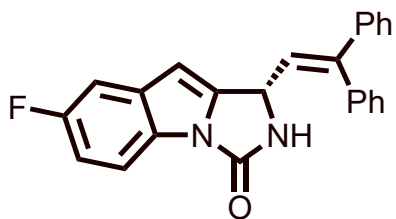

---120.13

Current Data Parameter:  
NAME spa4092!  
EXPNO 23:  
PROCNO :

F2 - Processing parameter  
SI 6553:  
SF 376.498366:  
WDW EI  
SSB (  
LB 0.30  
GB (  
PC 1.00

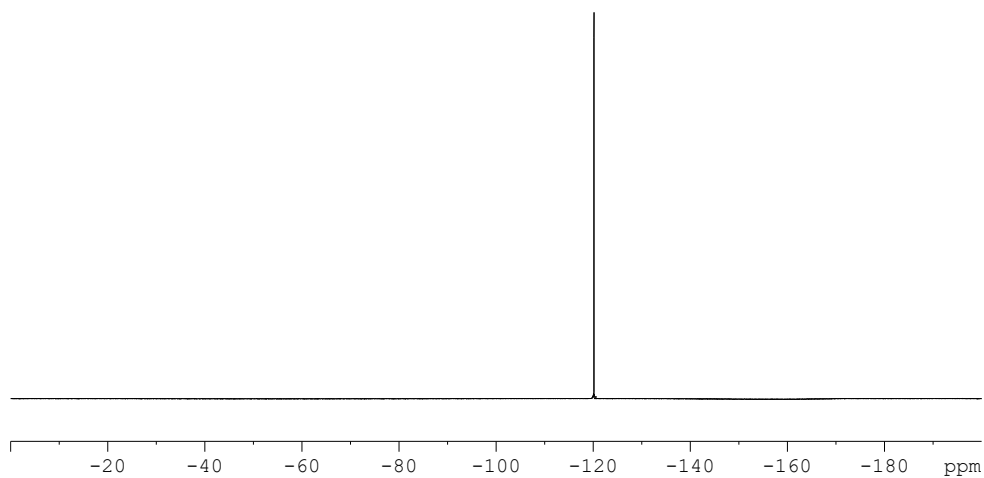

**<sup>19</sup>F NMR (376 MHz, CDCl<sub>3</sub>) spectrum of 3g**

**(S)-7-bromo-1-(2,2-diphenylvinyl)-1,2-dihydro-3H-imidazo[1,5-a]indol-3-one (3h)**

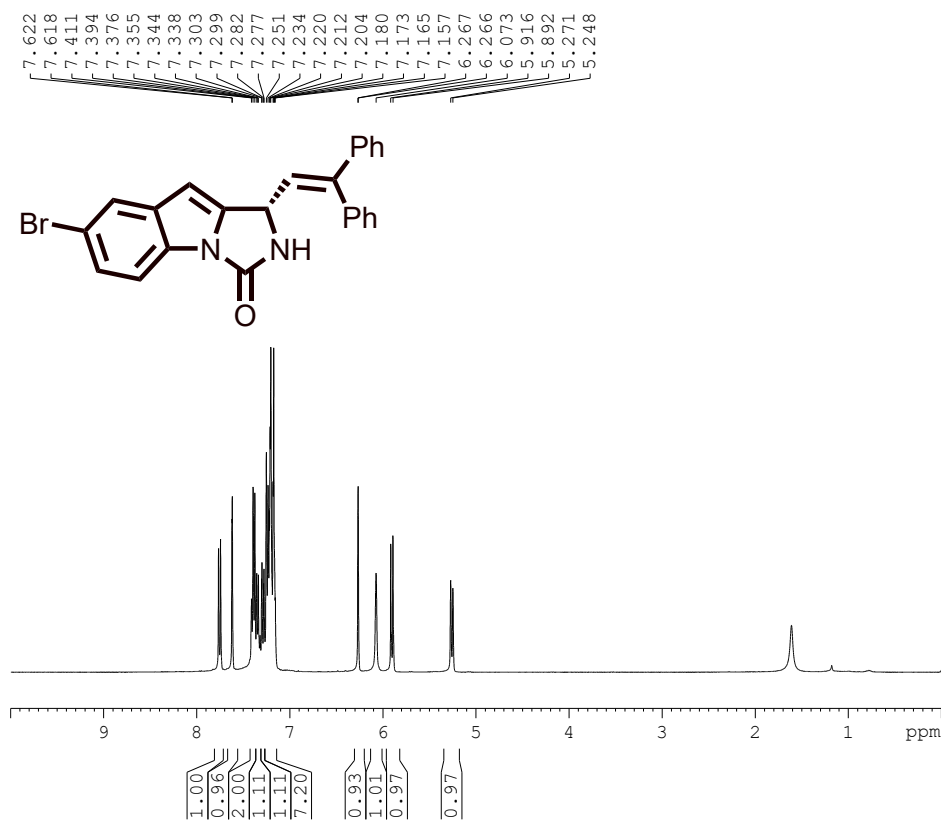

Current Data Parameter  
 NAME spa4102  
 EXPNO 9  
 PROCNO

F2 - Acquisition Param  
 Date\_ 2025102  
 Time\_ 12.3  
 INSTRUM AVNeo 400 - 5  
 PROBHD z166552\_002  
 PULPROG zg3  
 TD 2685  
 SOLVENT CDCl  
 NS 1  
 DS  
 SWH 8196.72  
 FIDRES 0.61037  
 AQ 1.638338  
 RG 10  
 DW 61.00  
 DE 13.8  
 TE 300.  
 D1 0.5000000  
 TD0  
 SFO1 400.132470  
 NUC1 1  
 P0 2.6  
 P1 8.0  
 PLW1 26.1499996

F2 - Processing param  
 SI 6553  
 SF 400.130044  
 WDW E  
 SSB  
 LB 0.3  
 GB  
 PC 1.0

**<sup>1</sup>H NMR (400 MHz, CDCl<sub>3</sub>) spectrum of 3h**

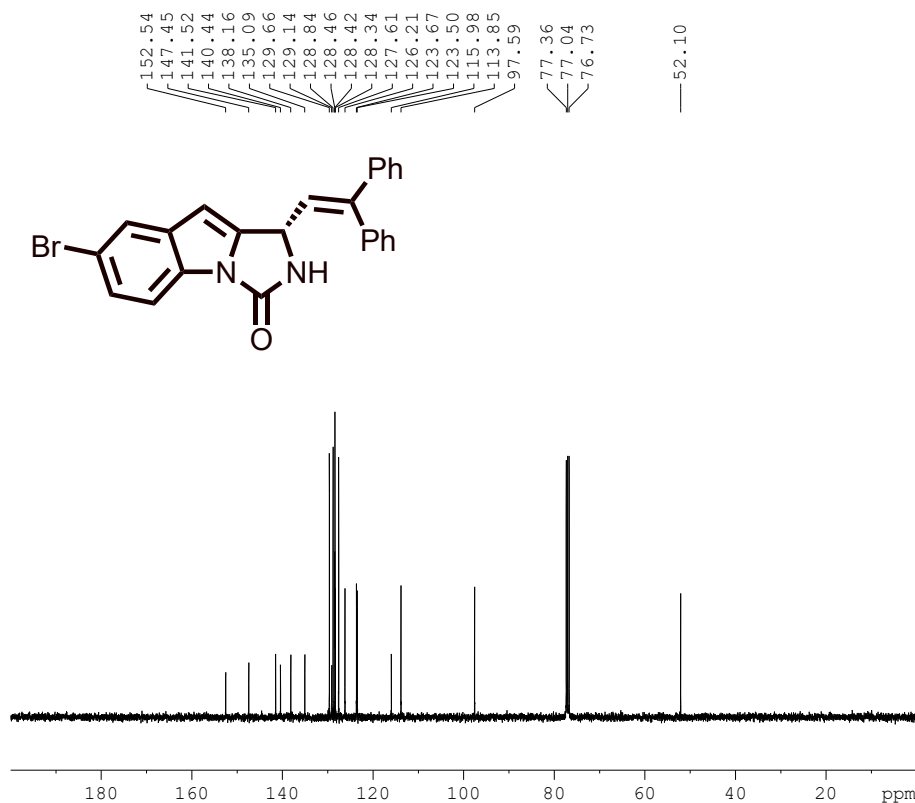

Current Data Parameters  
 NAME spa40925  
 EXPNO 84  
 PROCNO 1

F2 - Processing param  
 SI 32768  
 SF 100.6127685  
 WDW EM  
 SSB 0  
 LB 1.00  
 GB 0  
 PC 1.40

**<sup>13</sup>C NMR (100 MHz, CDCl<sub>3</sub>) spectrum of 3h**

**(S)-1-(2,2-diphenylvinyl)-7-iodo-1,2-dihydro-3H-imidazo[1,5-a]indol-3-one (3i)**

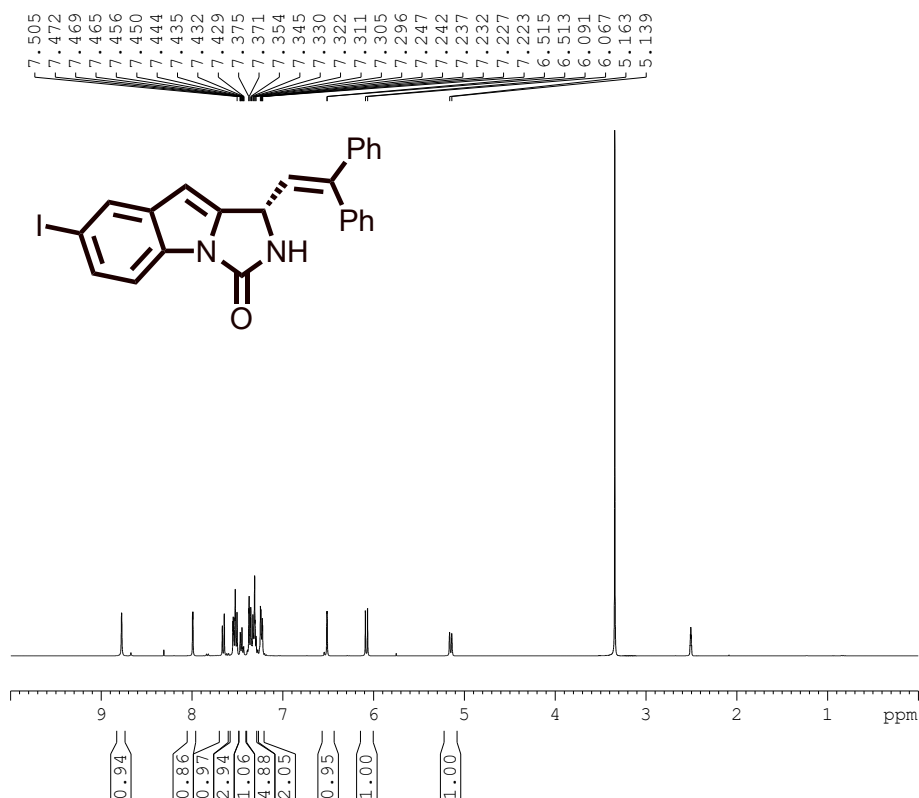

Current Data Parameters  
NAME spa41025  
EXPNO 34  
PROCNO 1

F2 - Acquisition Parameters  
Date\_ 20251004  
Time\_ 0.56  
INSTRUM AVNeo 400 - 50  
PROBHD Z166552\_0029  
PULPROG zg30  
TD 26858  
SOLVENT DMSO  
NS 16  
DS 2  
SWH 8196.721  
FIDRES 0.610375  
AQ 1.6383380  
RG 101  
DW 61.000  
DE 13.89  
TE 300.9  
D1 0.50000000  
TDO 1  
SFO1 400.1324708  
NUC1 1H  
P0 2.67  
P1 8.00  
PLW1 26.14999962

F2 - Processing parameters  
SI 65536  
SF 400.1300000  
WDW EM  
SSB 0  
LB 0.30  
GB 0  
PC 1.00

**<sup>1</sup>H NMR (400 MHz, DMSO-*d*<sub>6</sub>) spectrum of 3i**

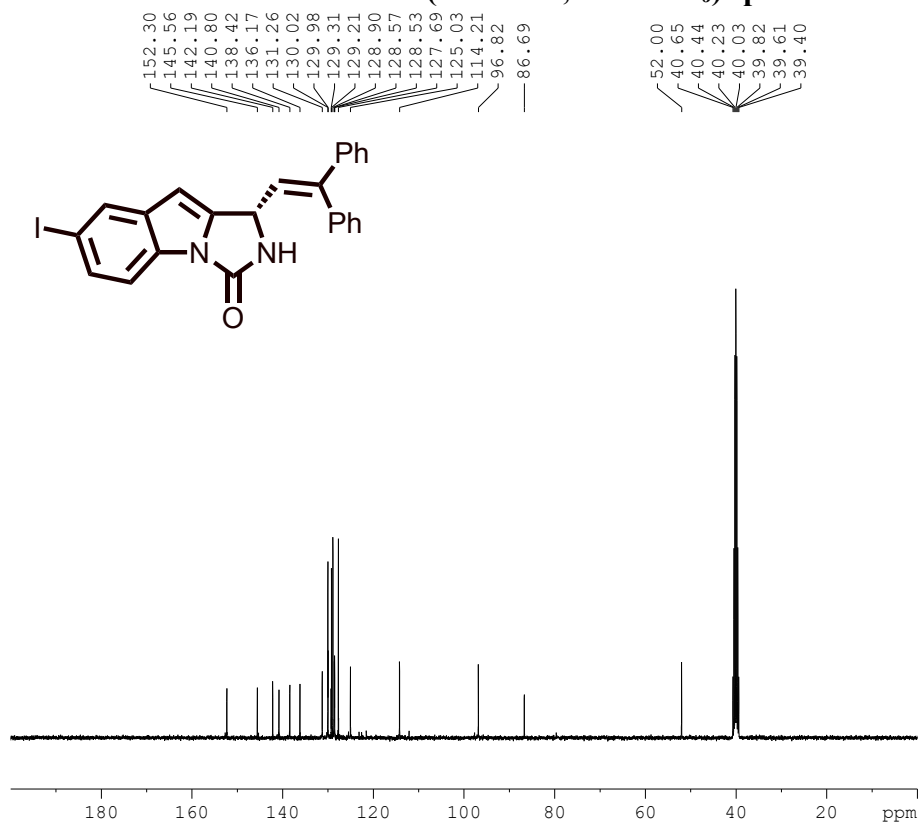

Current Data Parameters  
NAME spa41025  
EXPNO 35  
PROCNO 1

F2 - Processing parameters  
SI 32768  
SF 100.6127685  
WDW EM  
SSB 0  
LB 1.00  
GB 0  
PC 1.40

**<sup>13</sup>C NMR (100 MHz, DMSO-*d*<sub>6</sub>) spectrum of 3i**

**(S)-6-chloro-1-(2,2-diphenylvinyl)-1,2-dihydro-3H-imidazo[1,5-a]indol-3-one (3j)**

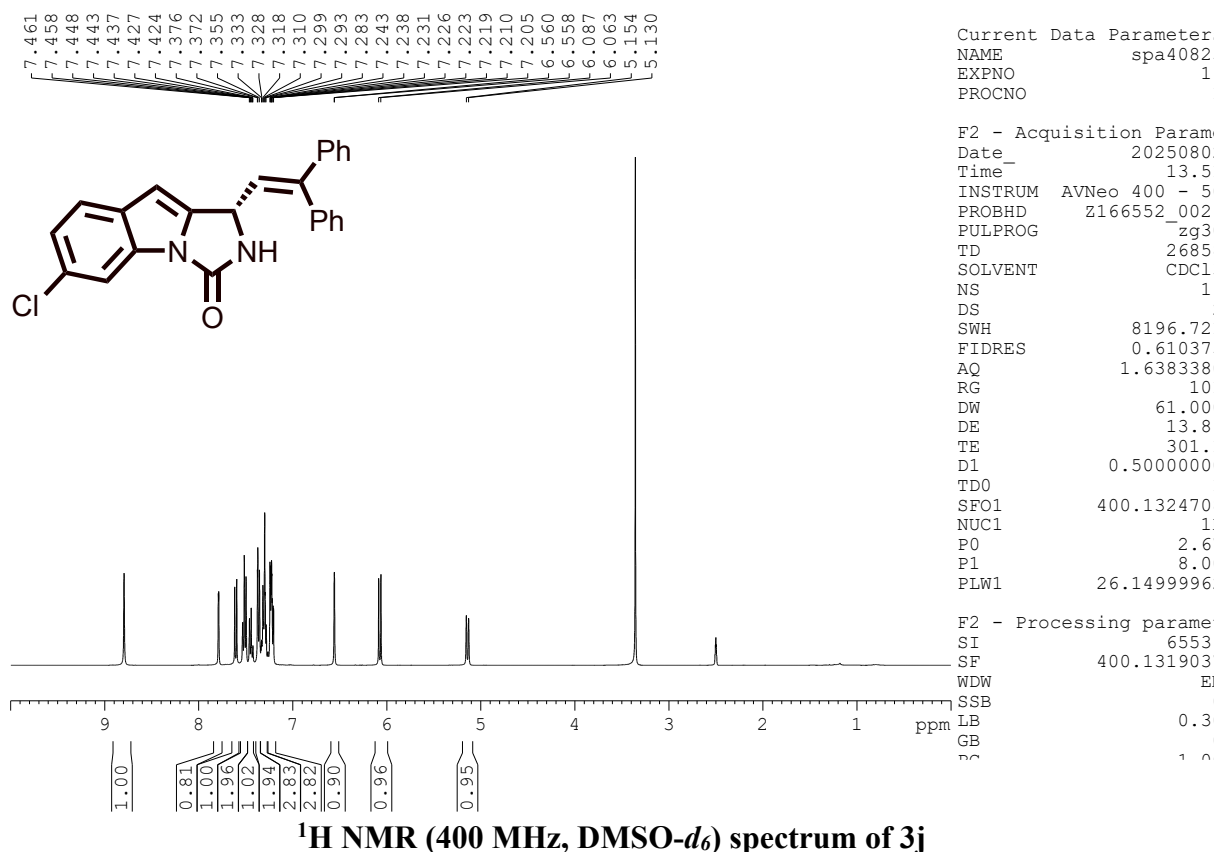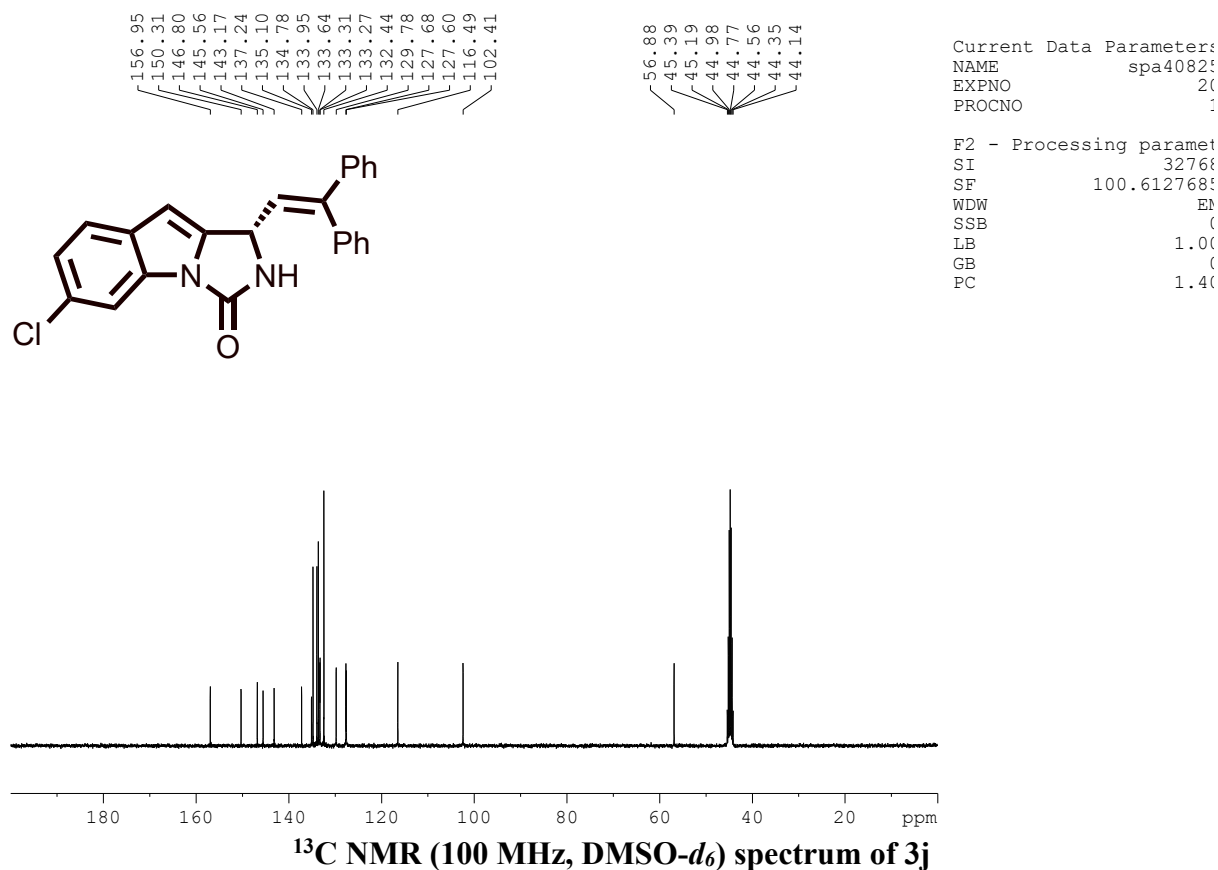

**(S)-6-bromo-1-(2,2-diphenylvinyl)-1,2-dihydro-3H-imidazo[1,5-a]indol-3-one (3k)**

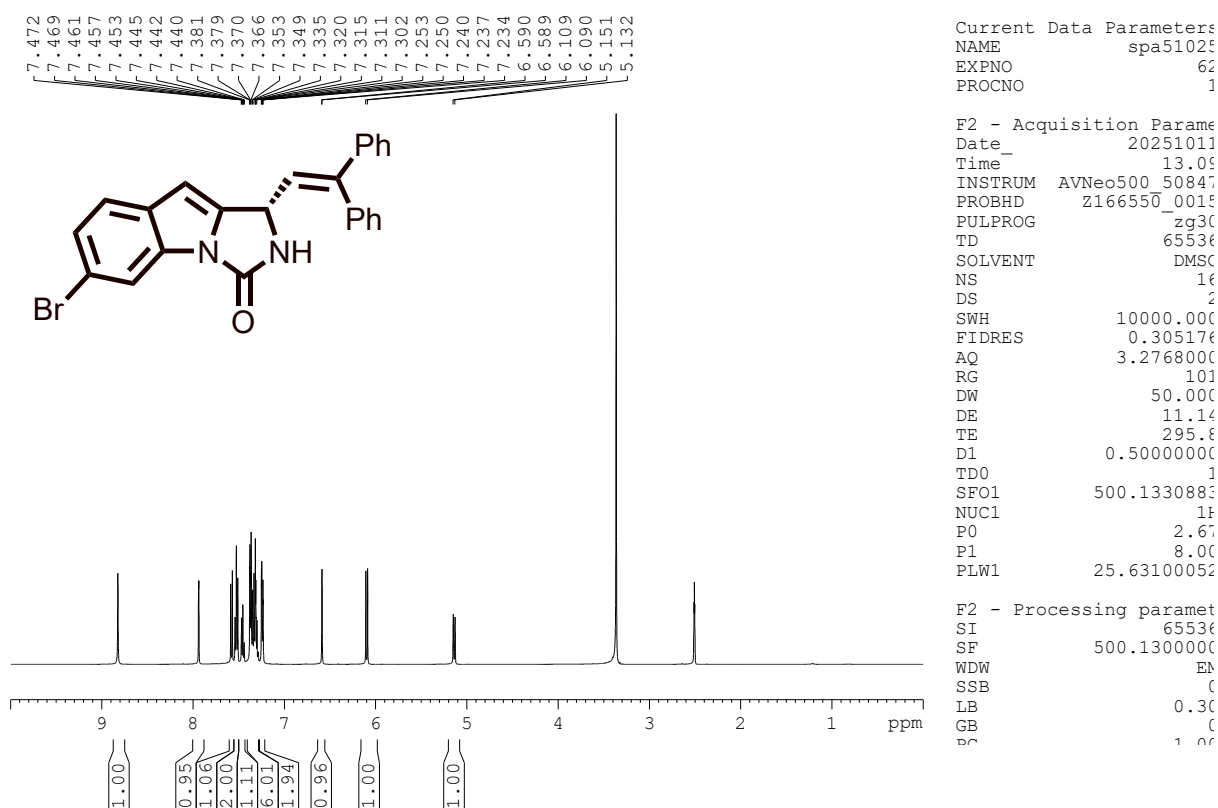

**<sup>1</sup>H NMR (500 MHz, DMSO-*d*<sub>6</sub>) spectrum of 3k**

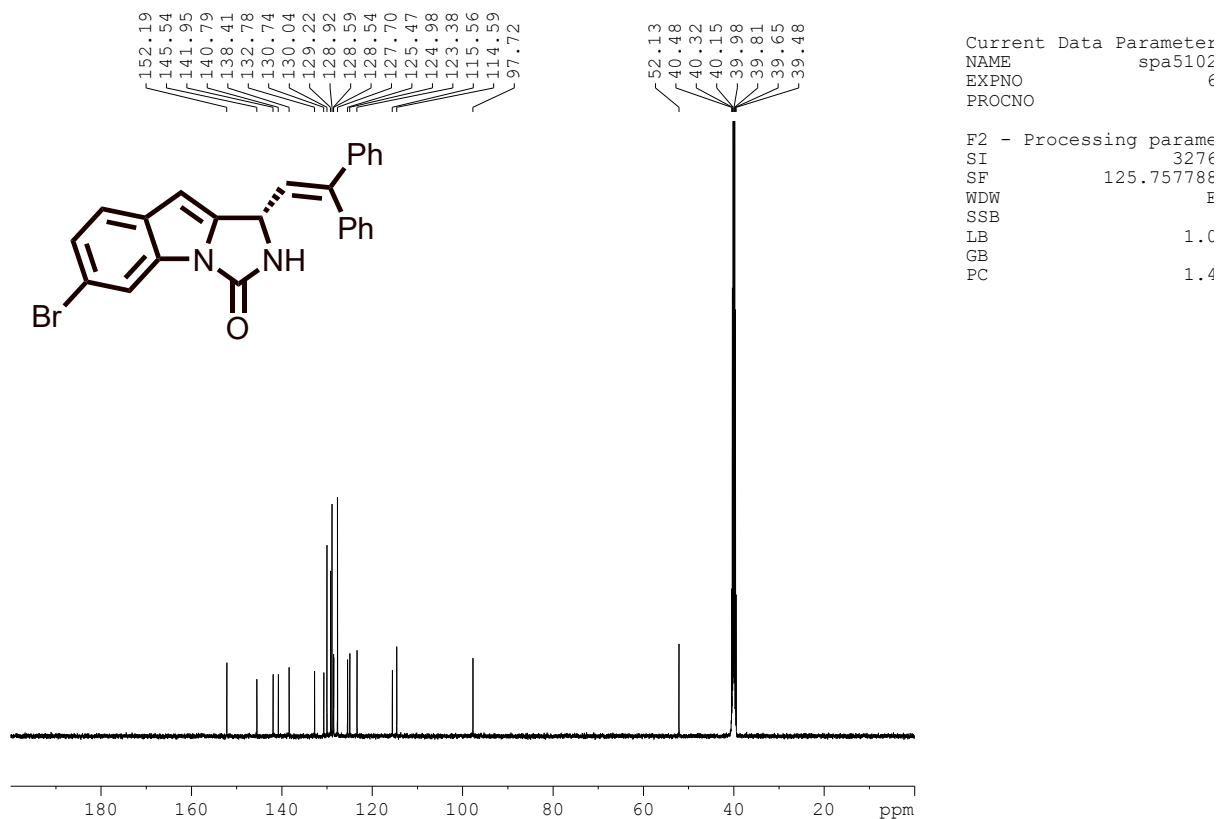

**<sup>13</sup>C NMR (125 MHz, DMSO-*d*<sub>6</sub>) spectrum of 3k**

**methyl (S)-1-(2,2-diphenylvinyl)-3-oxo-2,3-dihydro-1H-imidazo[1,5-a]indole-7-carboxylate (3l)**

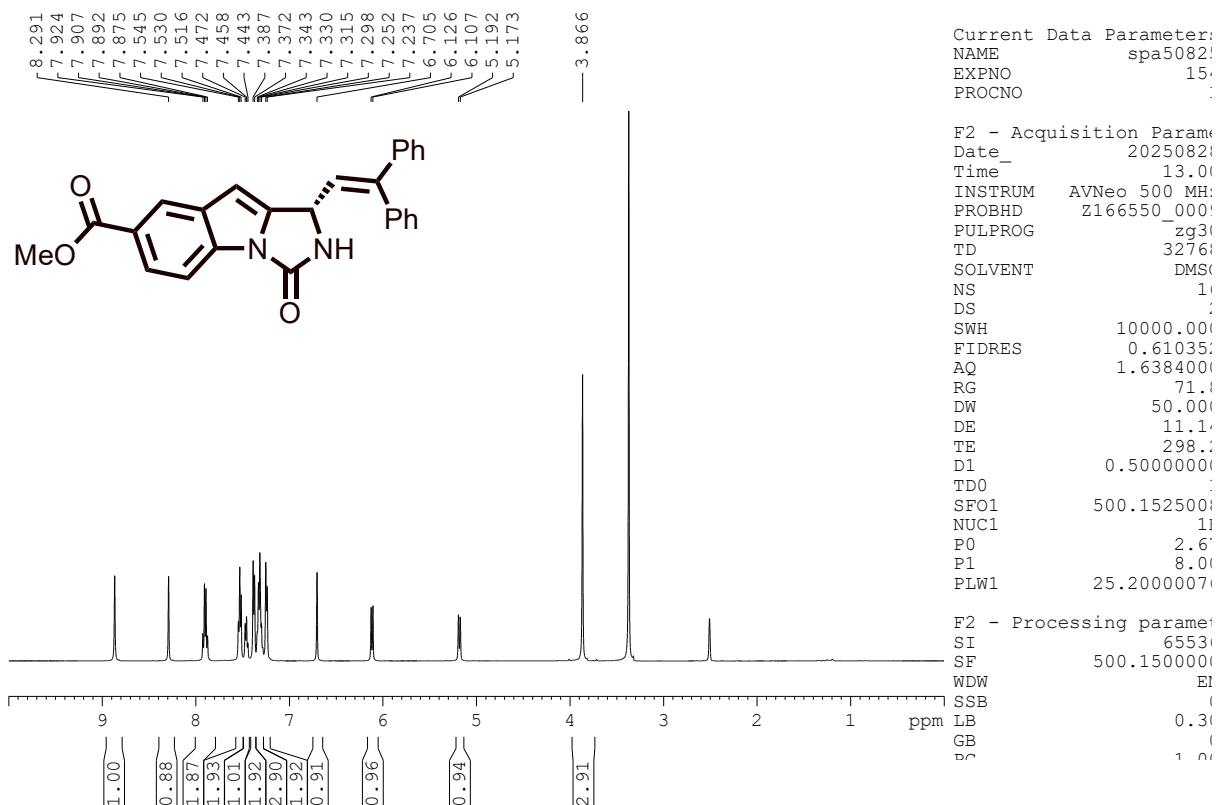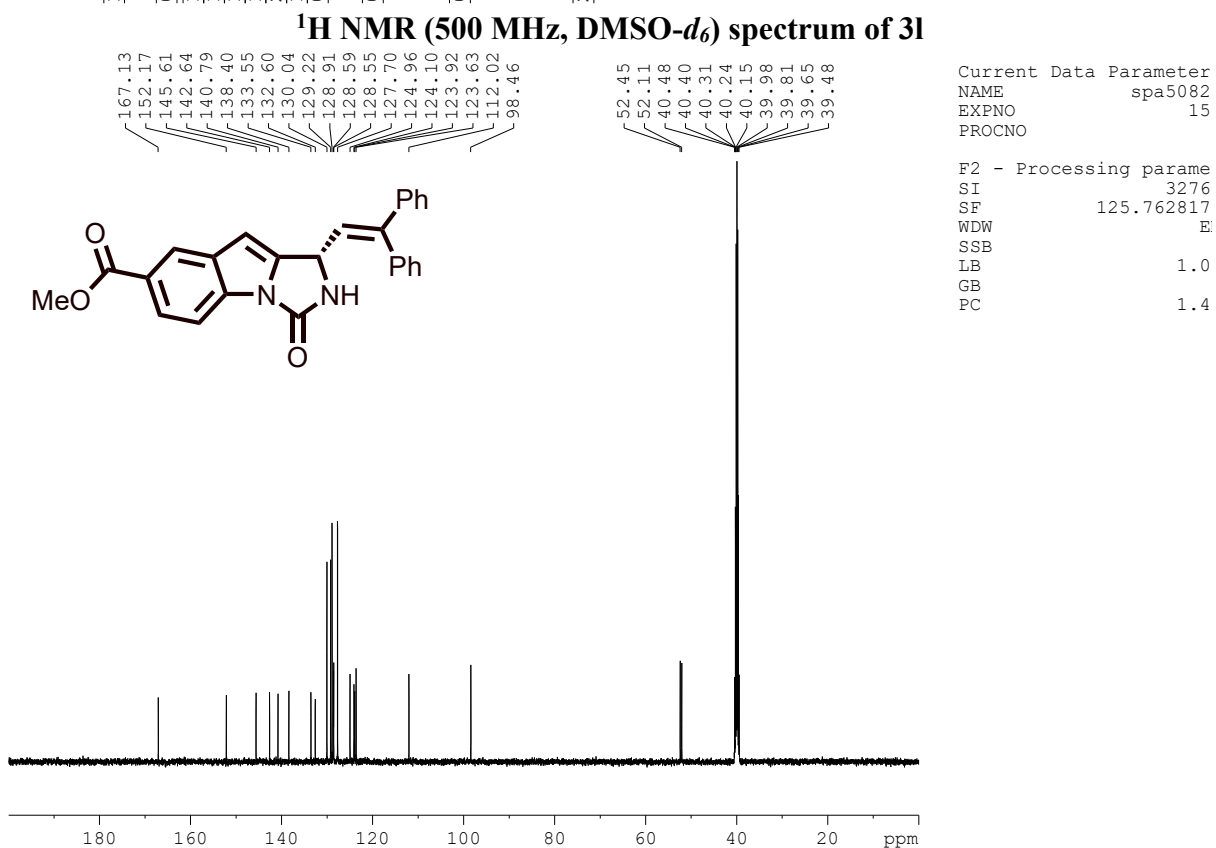

allyl (S)-1-(2,2-diphenylvinyl)-3-oxo-2,3-dihydro-1H-imidazo[1,5-a]indole-7-carboxylate

(3m)

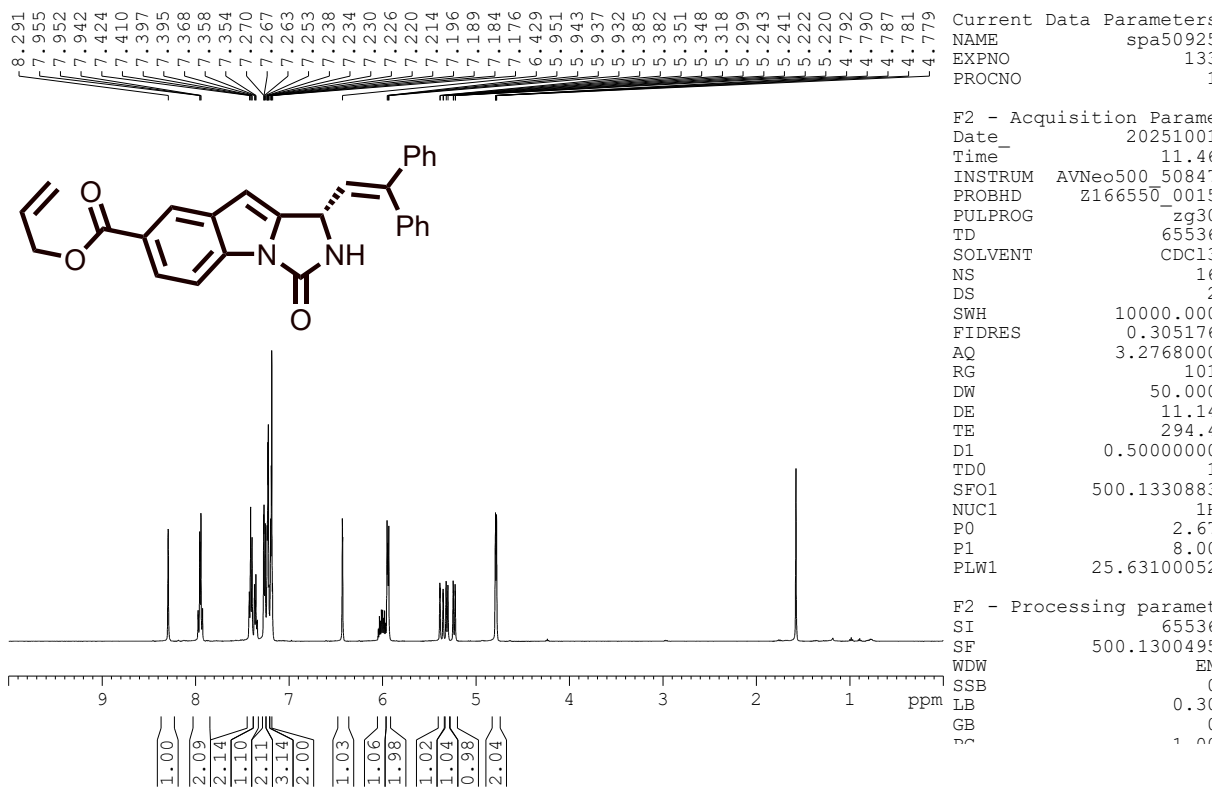

<sup>1</sup>H NMR (400 MHz, CDCl<sub>3</sub>) spectrum of 3m

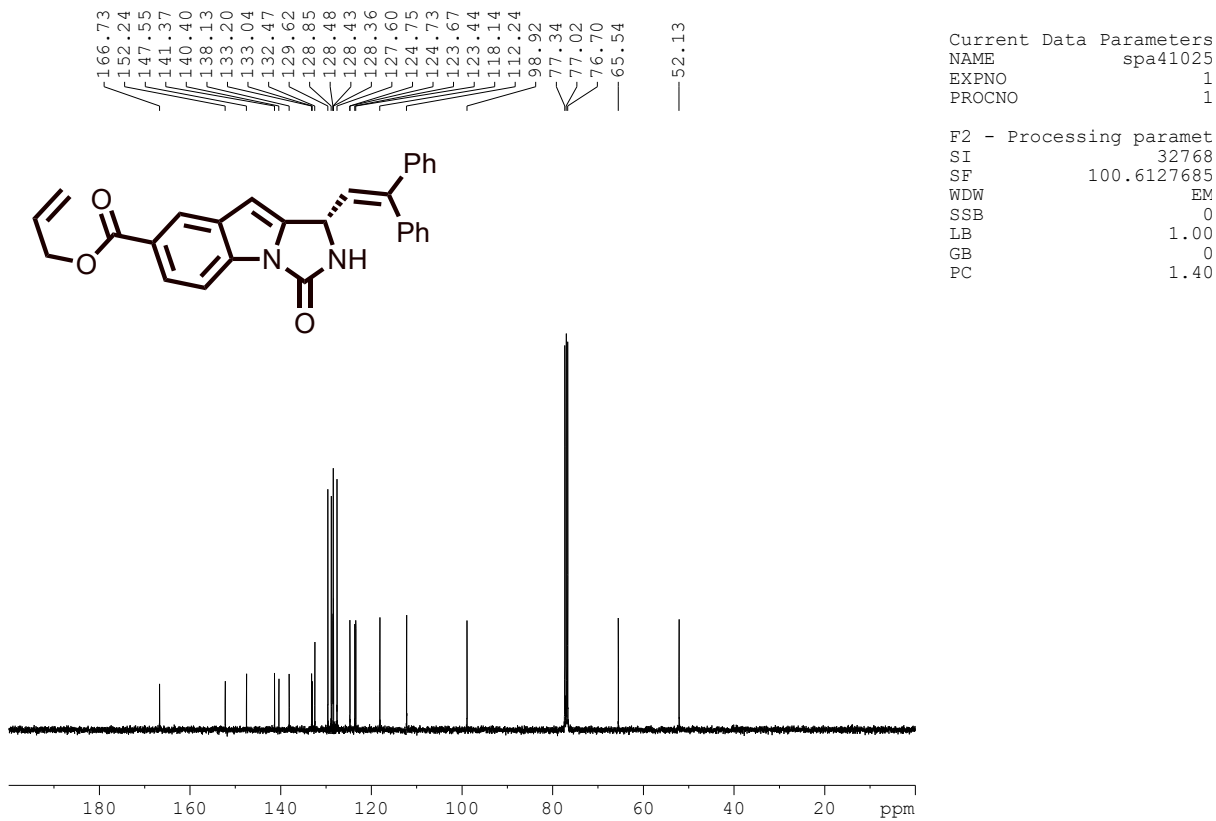

<sup>13</sup>C NMR (100 MHz, CDCl<sub>3</sub>) spectrum of 3m

**but-2-yn-1-yl (S)-1-(2,2-diphenylvinyl)-3-oxo-2,3-dihydro-1H-imidazo[1,5-a]indole-7-carboxylate (3n)**

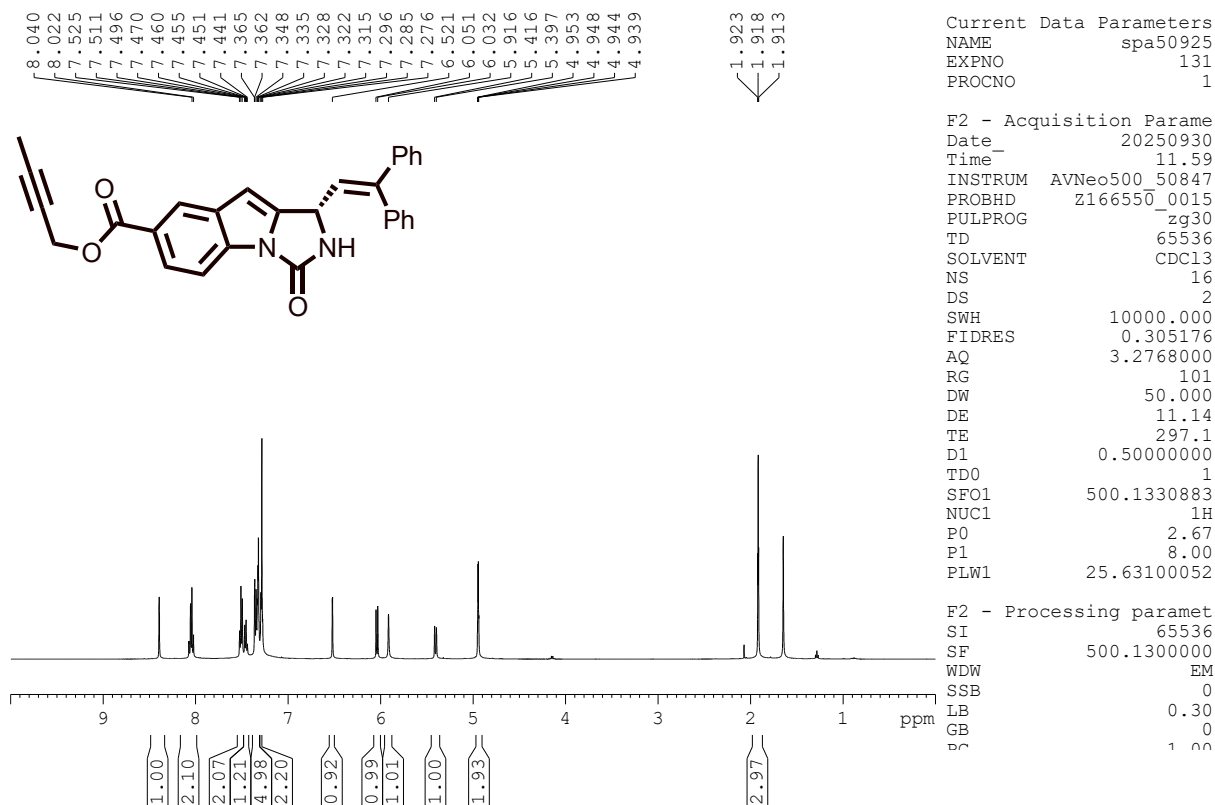

**<sup>1</sup>H NMR (500 MHz, CDCl<sub>3</sub>) spectrum of 3n**

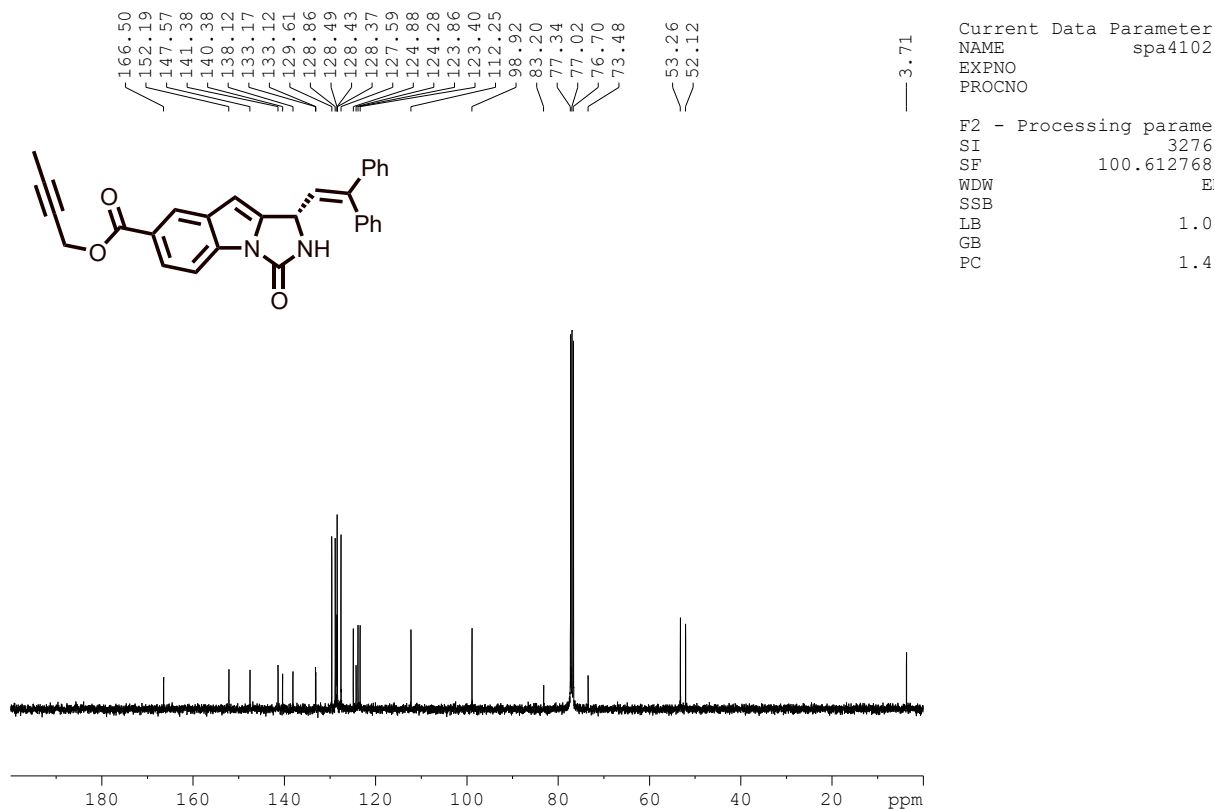

**<sup>13</sup>C NMR (100 MHz, CDCl<sub>3</sub>) spectrum of 3n**

**(S)-1-(2,2-di-p-tolylvinyl)-1,2-dihydro-3H-imidazo[1,5-a]indol-3-one (3o)**

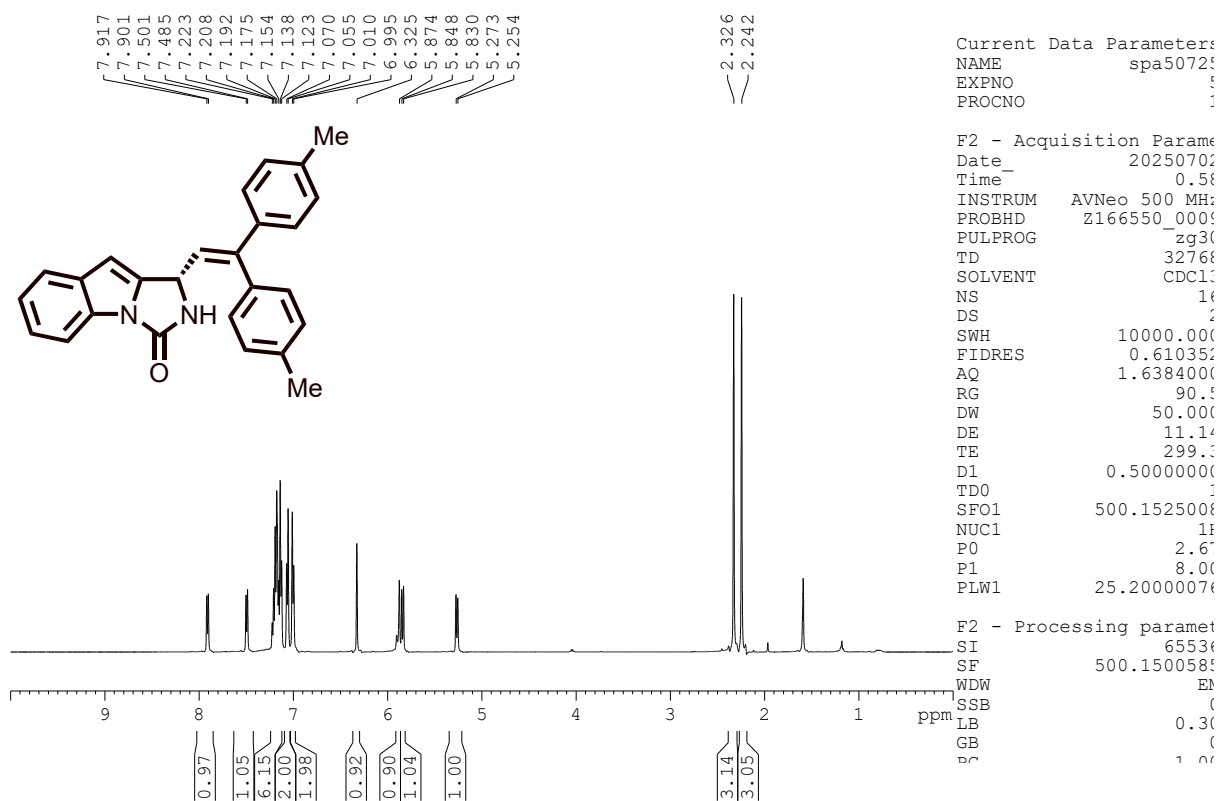

**<sup>1</sup>H NMR (500 MHz, CDCl<sub>3</sub>) spectrum of 3o**

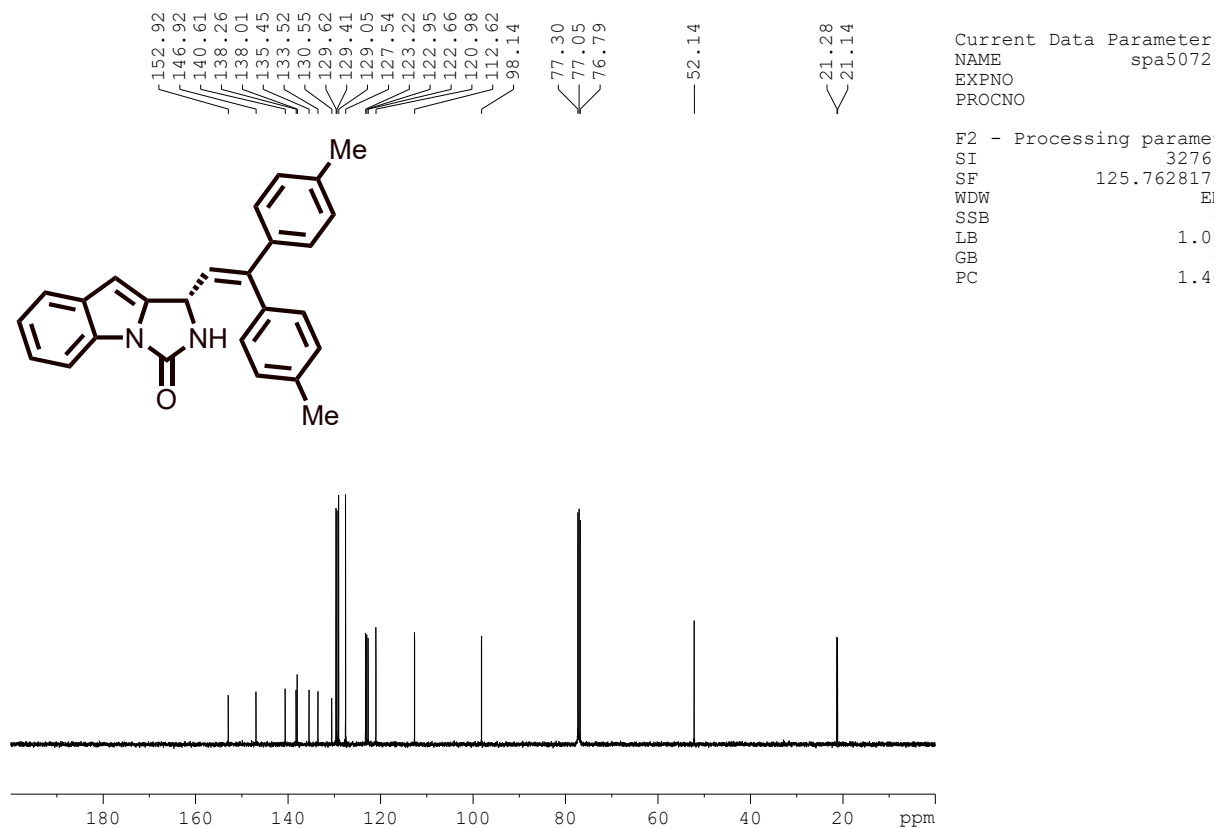

**<sup>13</sup>C NMR (125 MHz, CDCl<sub>3</sub>) spectrum of 3o**

**(S)-1-(2,2-di-m-tolylvinyl)-1,2-dihydro-3H-imidazo[1,5-a]indol-3-one (3p)**

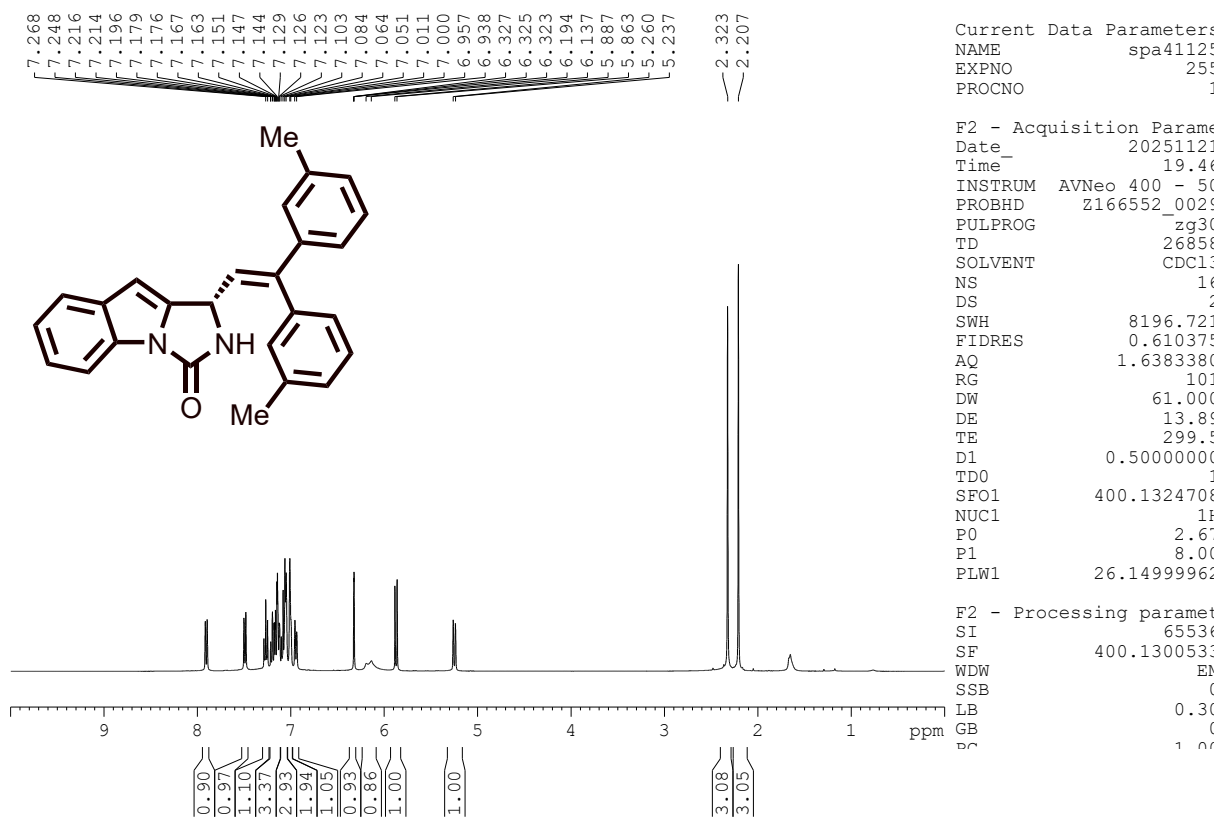

**<sup>1</sup>H NMR (400 MHz, CDCl<sub>3</sub>) spectrum of 3p**

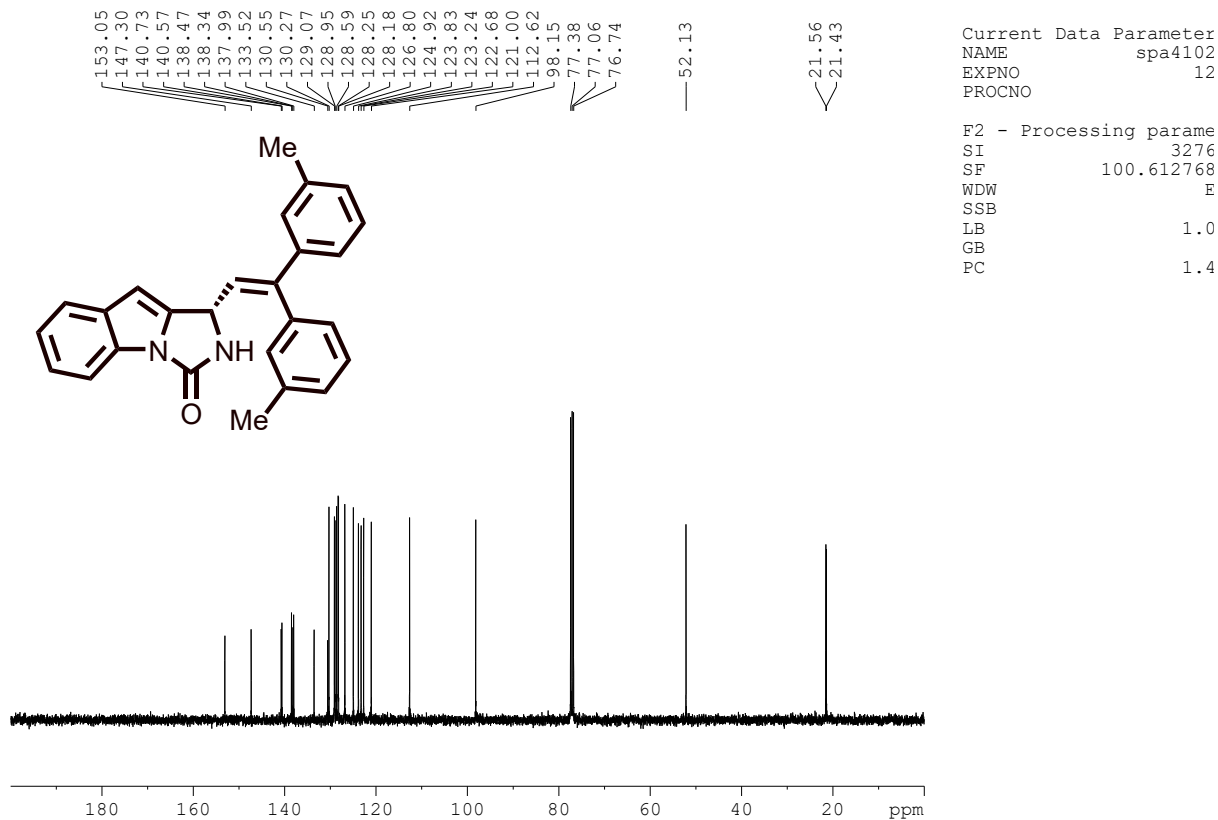

**<sup>13</sup>C NMR (100 MHz, CDCl<sub>3</sub>) spectrum of 3p**

**(S)-1-(2,2-di-o-tolylvinyl)-1,2-dihydro-3H-imidazo[1,5-a]indol-3-one (3q)**

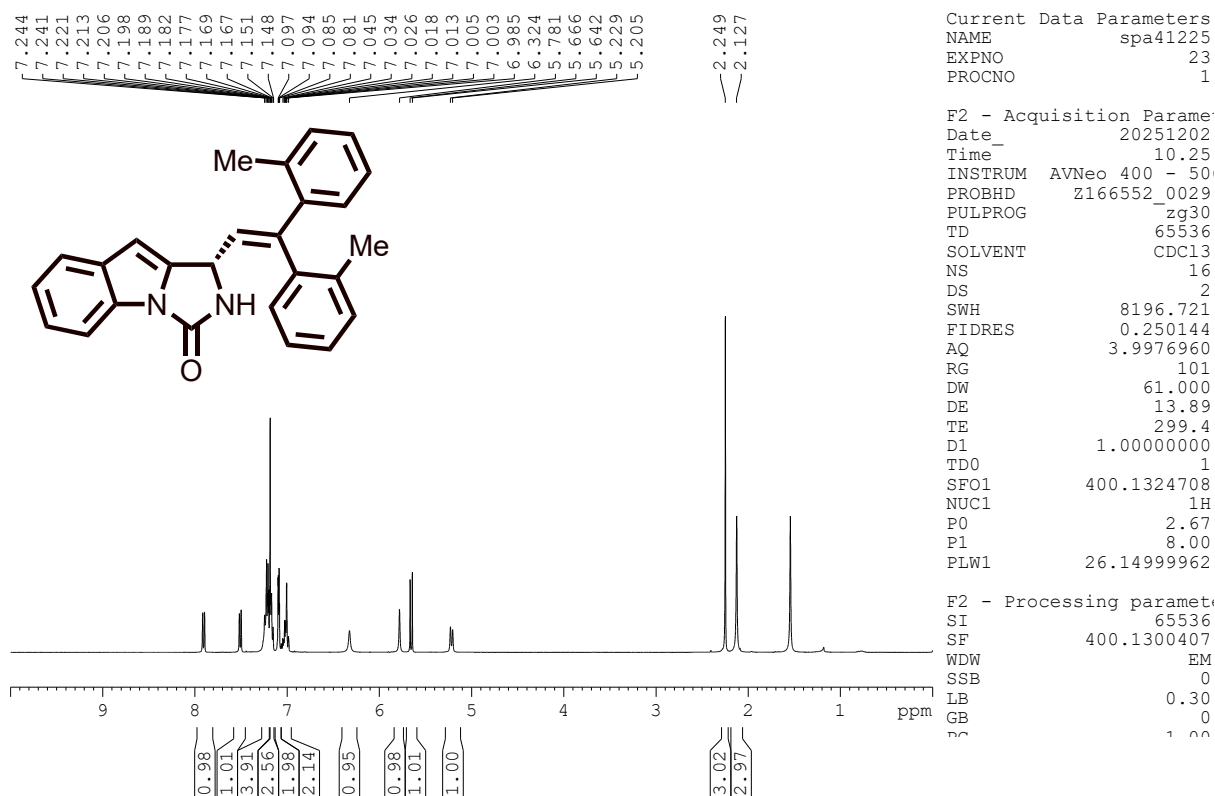

**<sup>1</sup>H NMR (400 MHz, CDCl<sub>3</sub>) spectrum of 3q**

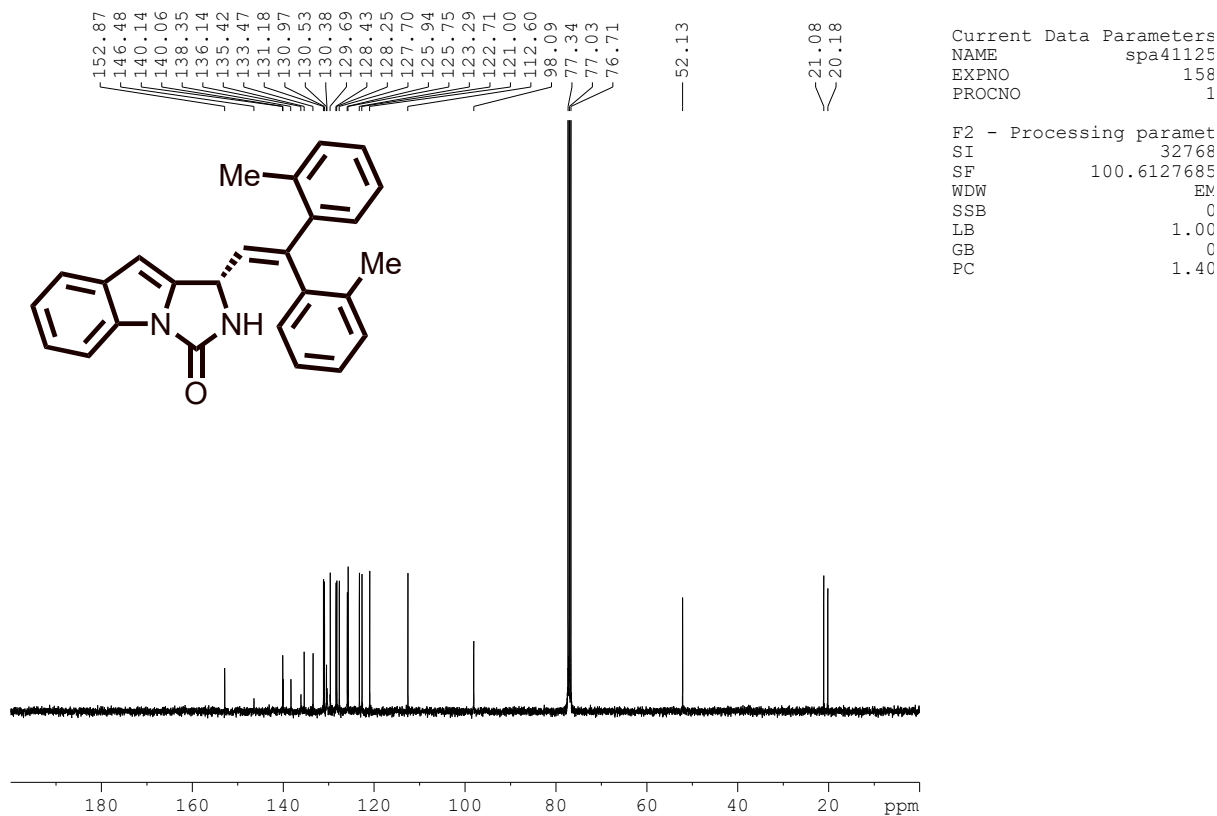

**<sup>13</sup>C NMR (100 MHz, CDCl<sub>3</sub>) spectrum of 3q**

**(S)-1-(2,2-bis(4-fluorophenyl)vinyl)-1,2-dihydro-3H-imidazo[1,5-a]indol-3-one (3r)**

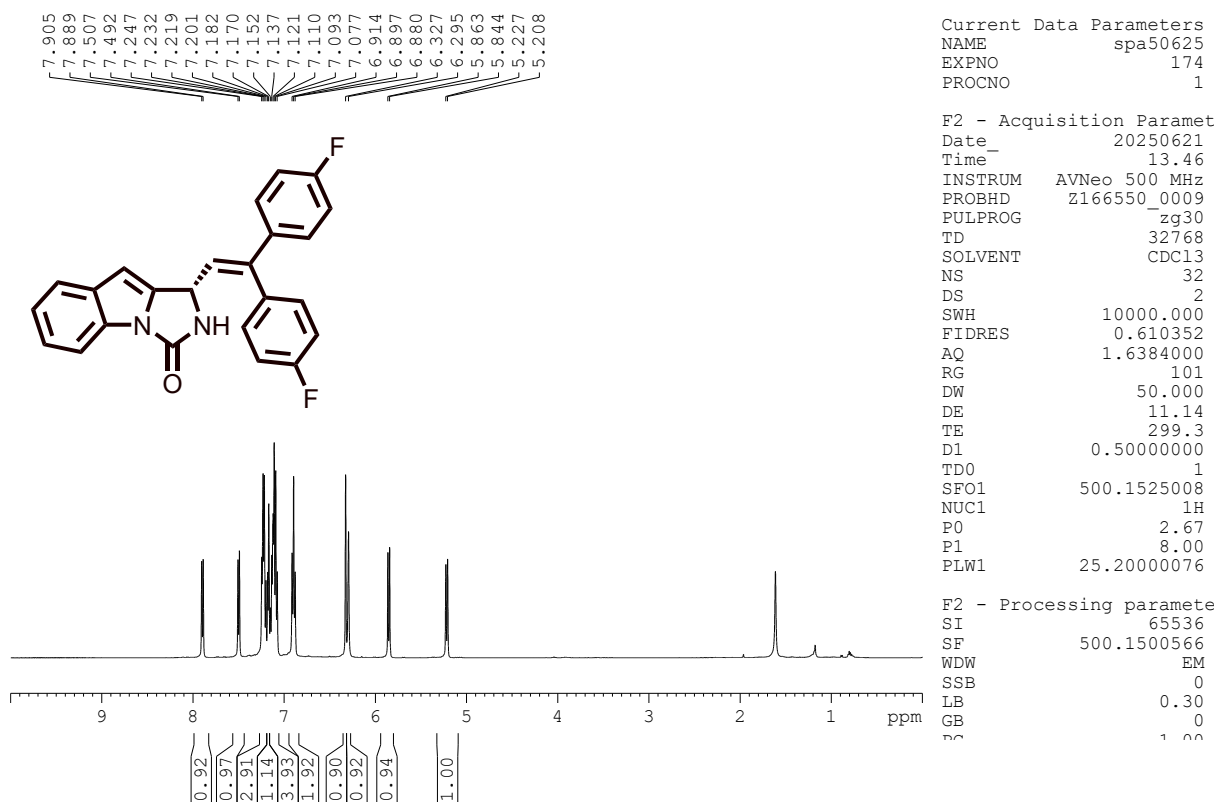

**<sup>1</sup>H NMR (500 MHz, CDCl<sub>3</sub>) spectrum of 3r**

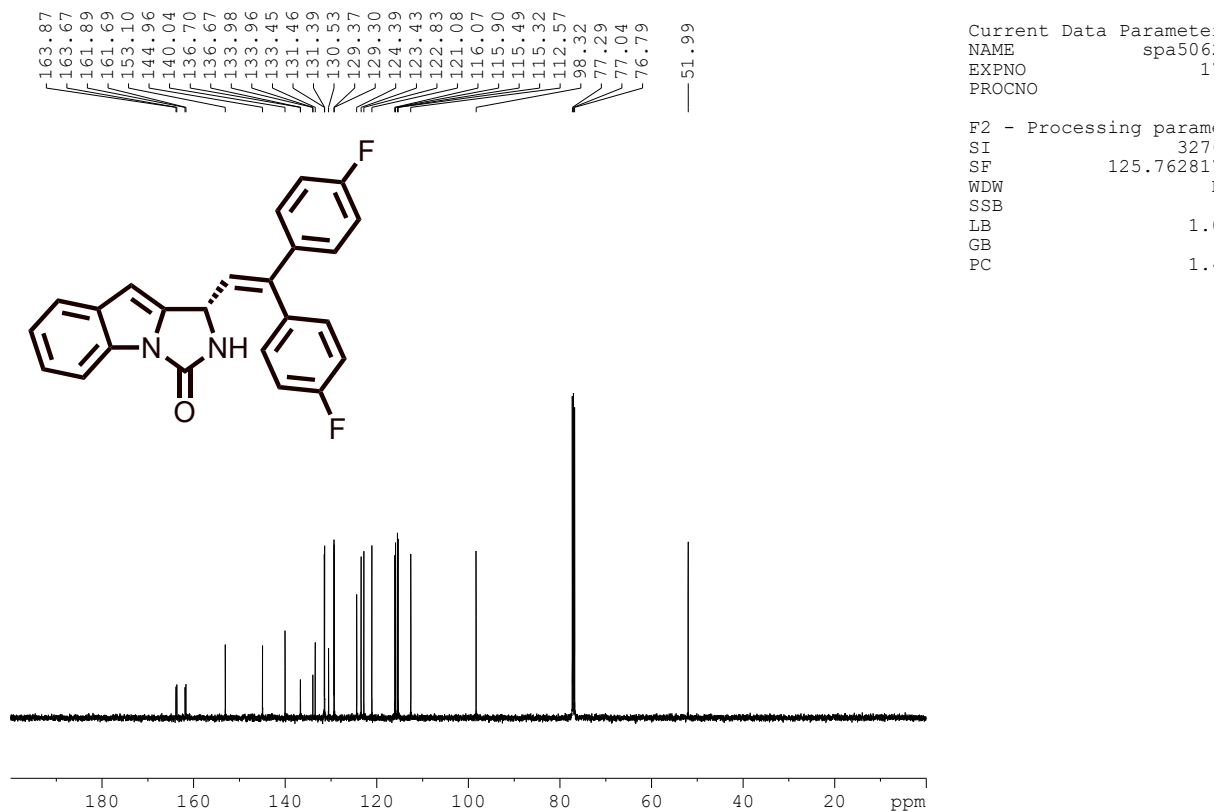

**<sup>13</sup>C NMR (125 MHz, CDCl<sub>3</sub>) spectrum of 3r**

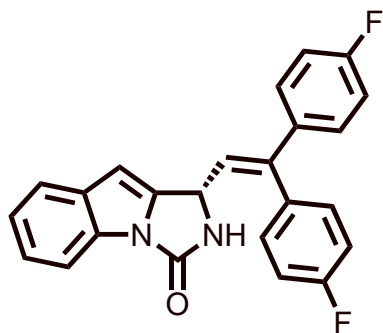

<-112.80  
<-113.18

Current Data Parameters:  
NAME spa5062!  
EXPNO 17  
PROCNO :

F2 - Processing paramet  
SI 65534  
SF 470.6111960  
WDW EM  
SSB (  
LB 0.30  
GB (  
PC 1.00

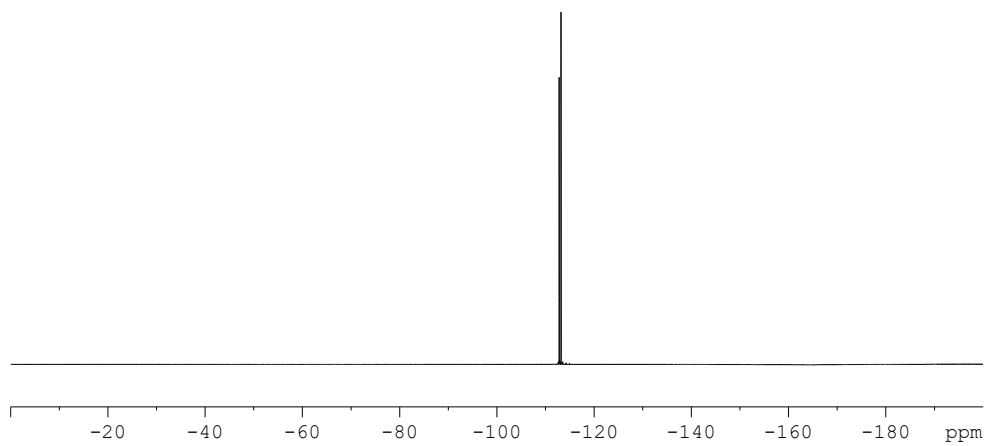

**<sup>19</sup>F NMR (470 MHz, CDCl<sub>3</sub>) spectrum of 3r**

**(S)-1-(2,2-bis(4-chlorophenyl)vinyl)-1,2-dihydro-3H-imidazo[1,5-a]indol-3-one (3s)**

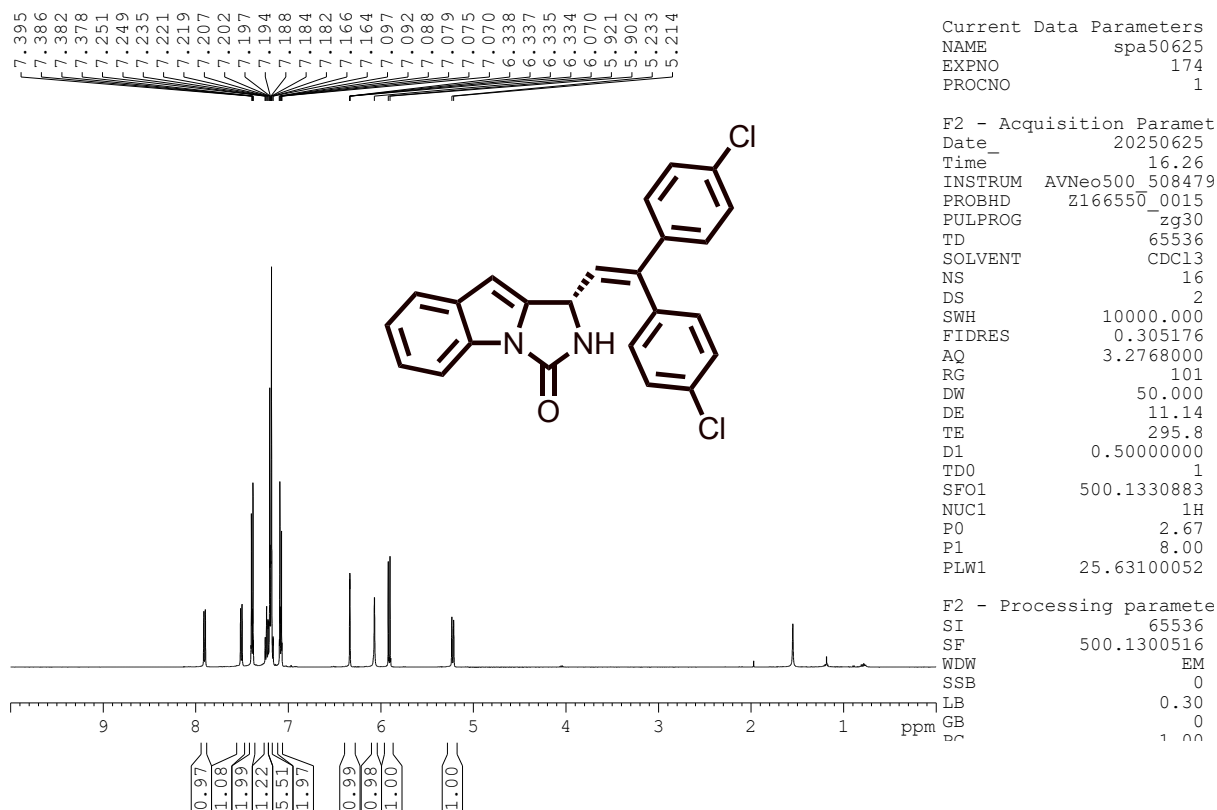

**<sup>1</sup>H NMR (500 MHz, CDCl<sub>3</sub>) spectrum of 3s**

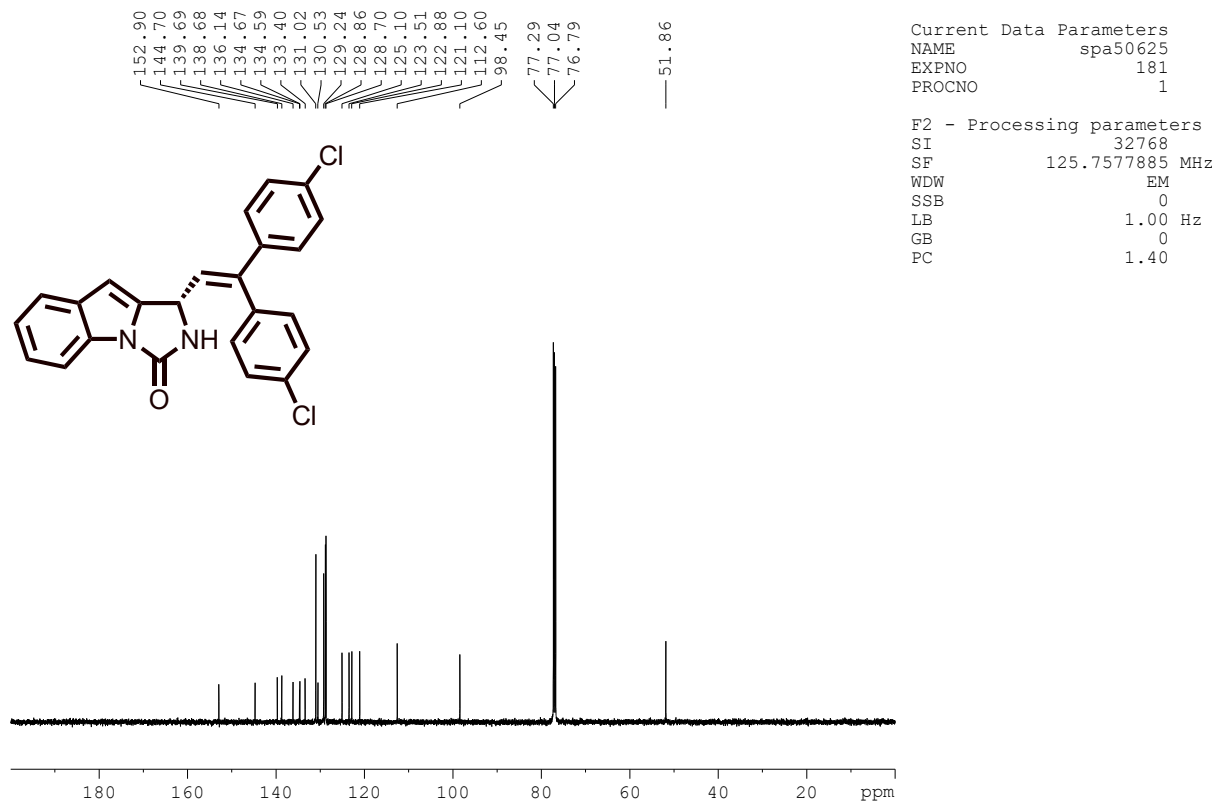

**<sup>13</sup>C NMR (125 MHz, CDCl<sub>3</sub>) spectrum of 3s**

**(S)-1-(2,2-bis(4-bromophenyl)vinyl)-1,2-dihydro-3H-imidazo[1,5-a]indol-3-one (3t)**

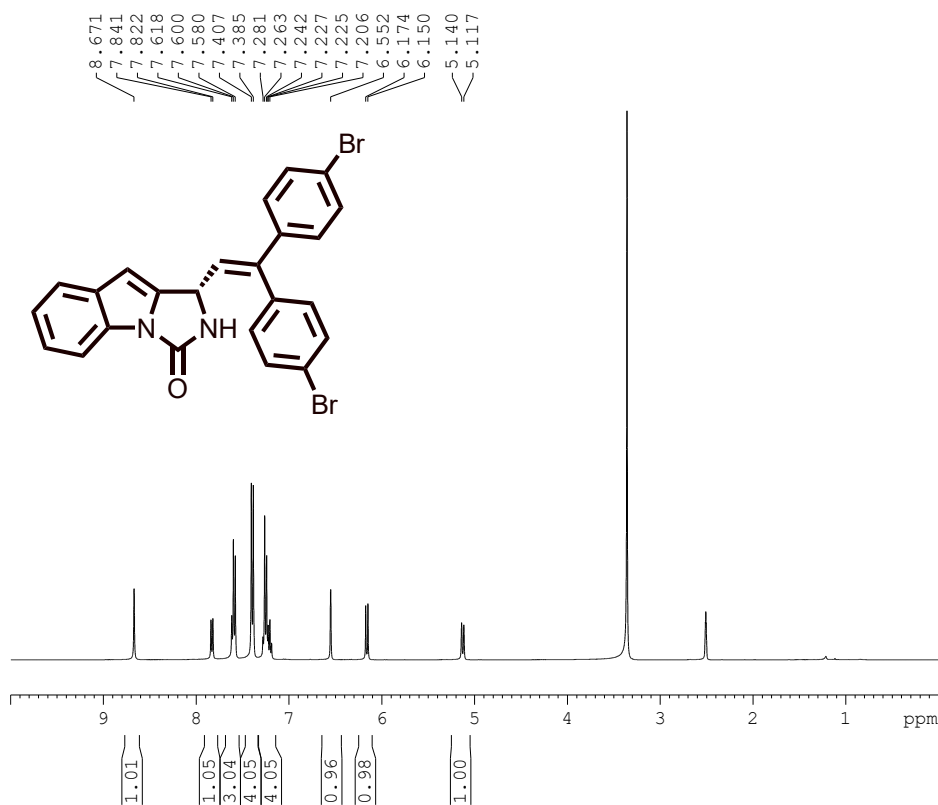

Current Data Parameters:  
 NAME spa4102!  
 EXPNO 9  
 PROCNO :

F2 - Acquisition Param  
 Date\_ 2025102!  
 Time\_ 14.04  
 INSTRUM AVNeo 400 - 50  
 PROBHD Z166552\_002!  
 PULPROG zg30  
 TD 2685!  
 SOLVENT DMSO  
 NS 14  
 DS :  
 SWH 8196.72!  
 FIDRES 0.61037!  
 AQ 1.638338!  
 RG 10:  
 DW 61.000  
 DE 13.8!  
 TE 299.8  
 D1 0.5000000  
 TD0 :  
 SFO1 400.1324708  
 NUC1 1H  
 P0 2.67  
 P1 8.00  
 PLW1 26.14999962

F2 - Processing paramet  
 SI 6553!  
 SF 400.1300000  
 WDW EM  
 SSB ( :  
 LB 0.30  
 GB ( :  
 PC 1.00

**<sup>1</sup>H NMR (400 MHz, DMSO-*d*<sub>6</sub>) spectrum of 3t**

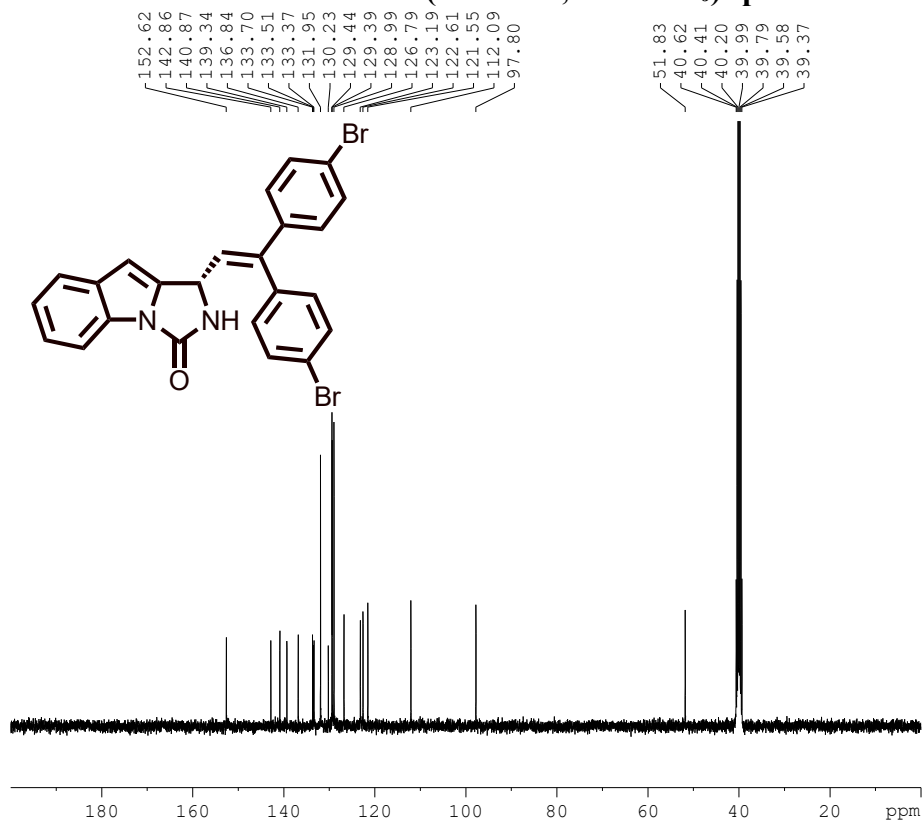

Current Data Parameters:  
 NAME spa4102!  
 EXPNO 9  
 PROCNO :

F2 - Processing paramet  
 SI 3276!  
 SF 100.612768!  
 WDW EM  
 SSB ( :  
 LB 1.00  
 GB ( :  
 PC 1.40

**<sup>13</sup>C NMR (100 MHz, DMSO-*d*<sub>6</sub>) spectrum of 3t**

**(S)-1-(2,2-bis(3,5-dimethylphenyl)vinyl)-1,2-dihydro-3H-imidazo[1,5-a]indol-3-one (3u)**

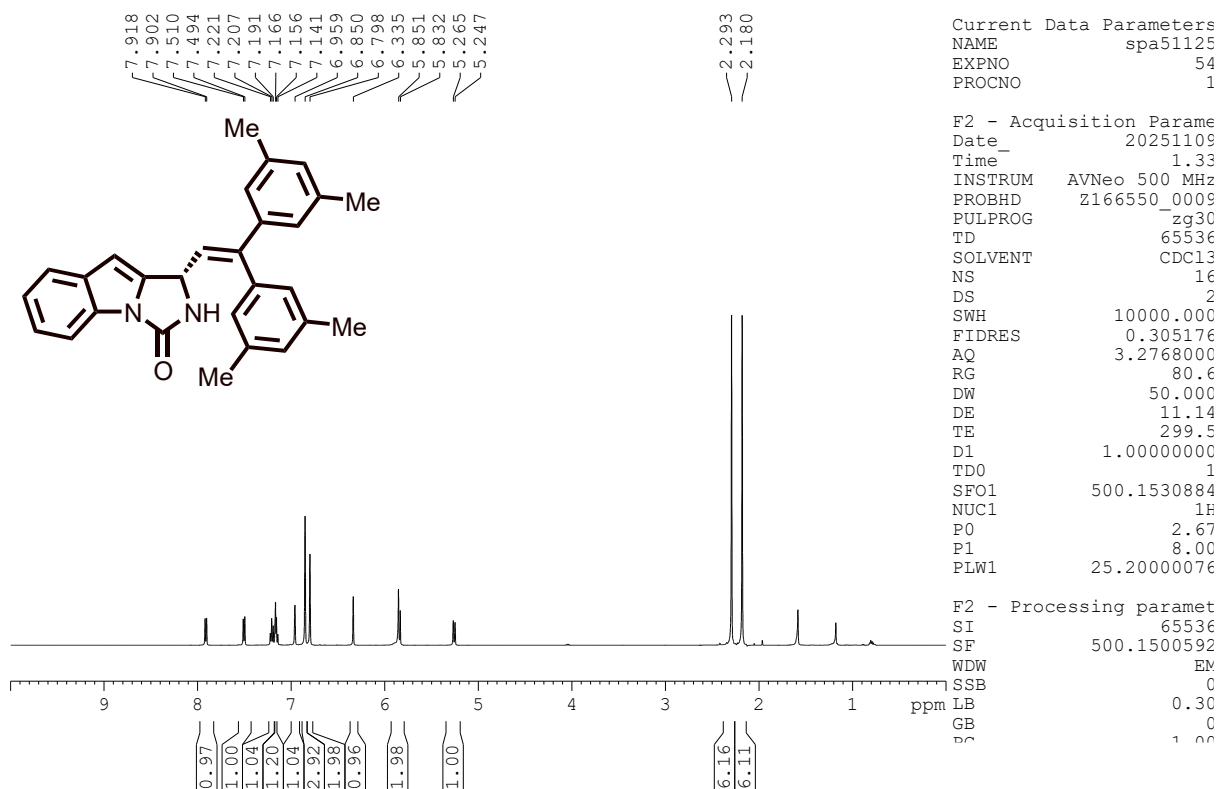

**<sup>1</sup>H NMR (500 MHz, CDCl<sub>3</sub>) spectrum of 3u**

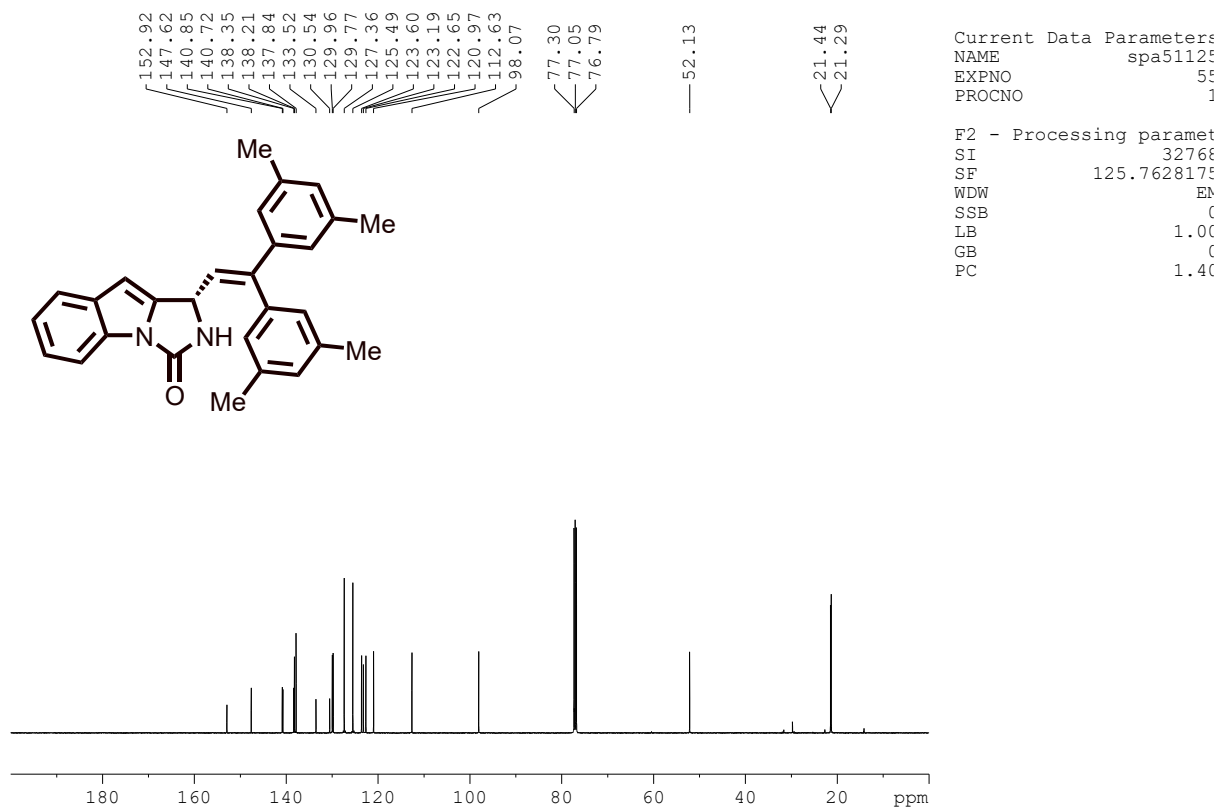

**<sup>13</sup>C NMR (125 MHz, CDCl<sub>3</sub>) spectrum of 3u**

**(S)-1-(2,2-bis(3-bromophenyl)vinyl)-1,2-dihydro-3H-imidazo[1,5-a]indol-3-one (3v)**

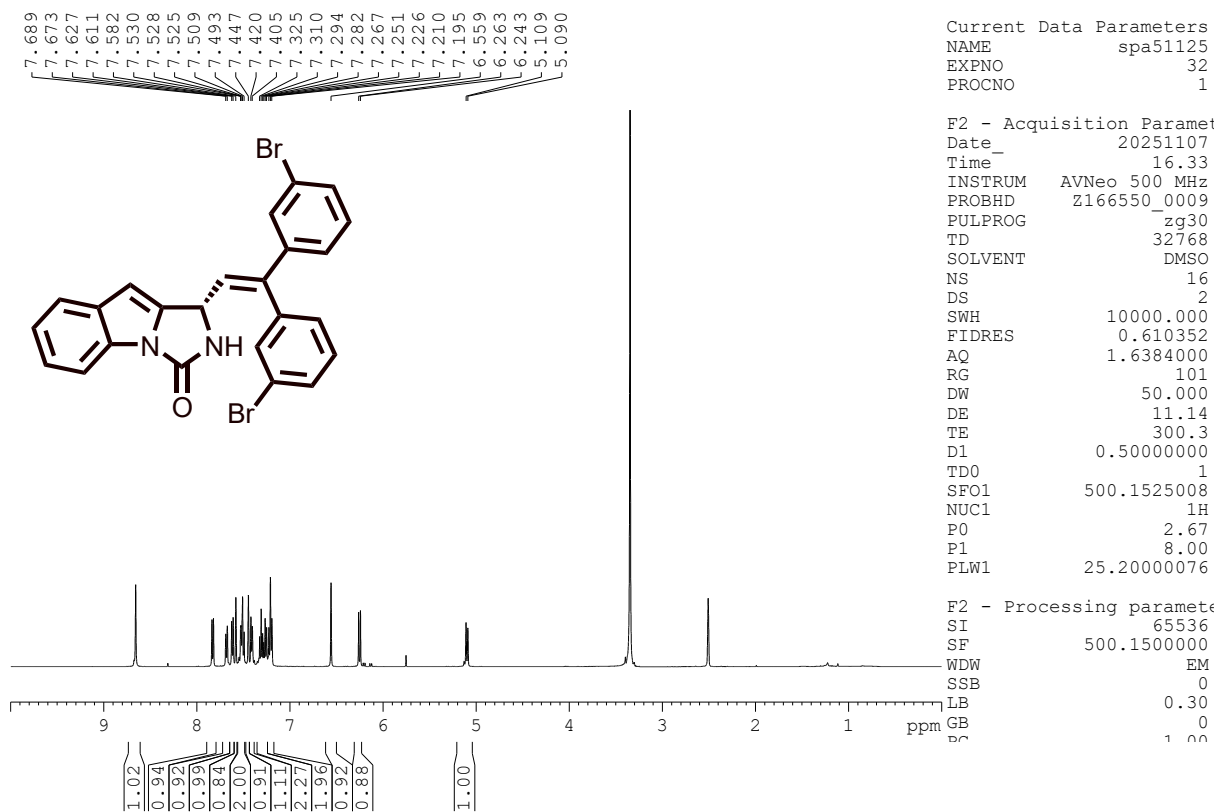

**<sup>1</sup>H NMR (500 MHz, DMSO-*d*<sub>6</sub>) spectrum of 3v**

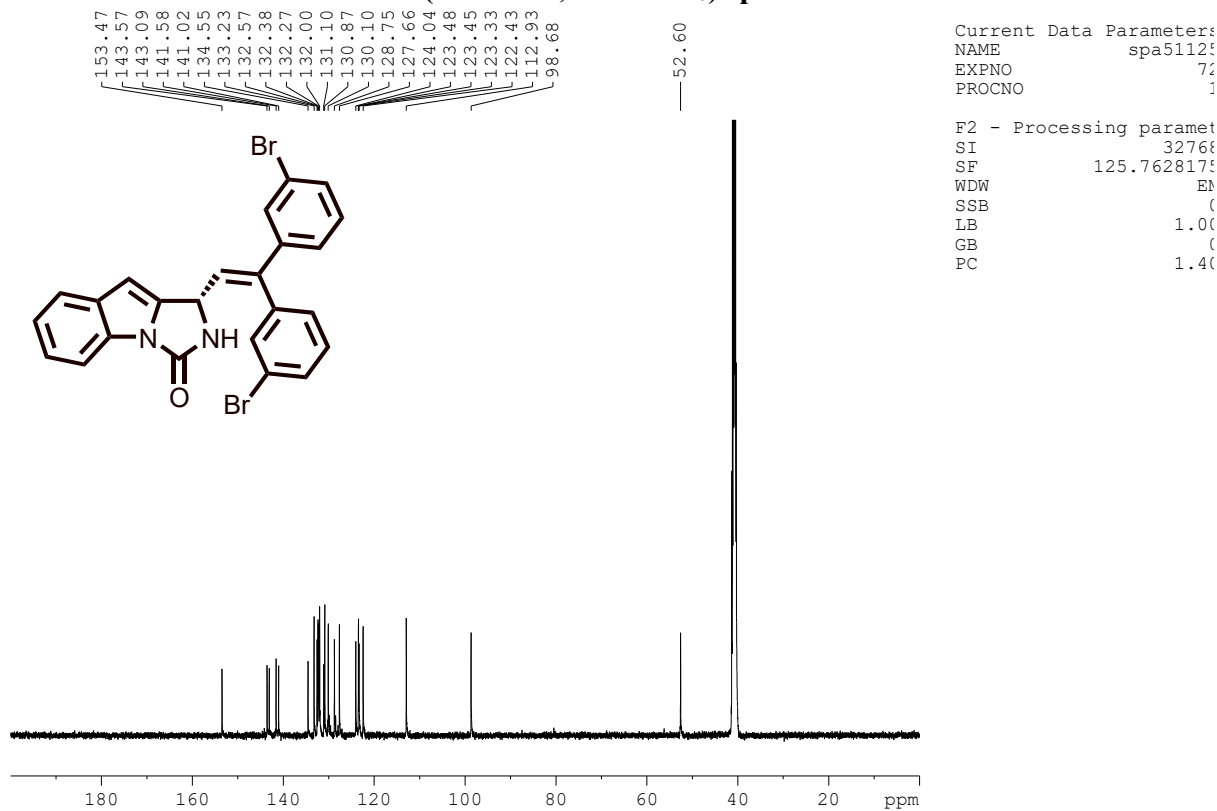

**<sup>13</sup>C NMR (125 MHz, DMSO-*d*<sub>6</sub>) spectrum of 3v**

**(S)-1-((10,11-dihydro-5H-dibenzo[a,d][7]annulen-5-ylidene)methyl)-1,2-dihydro-3H-imidazo[1,5-a]indol-3-one (3w)**

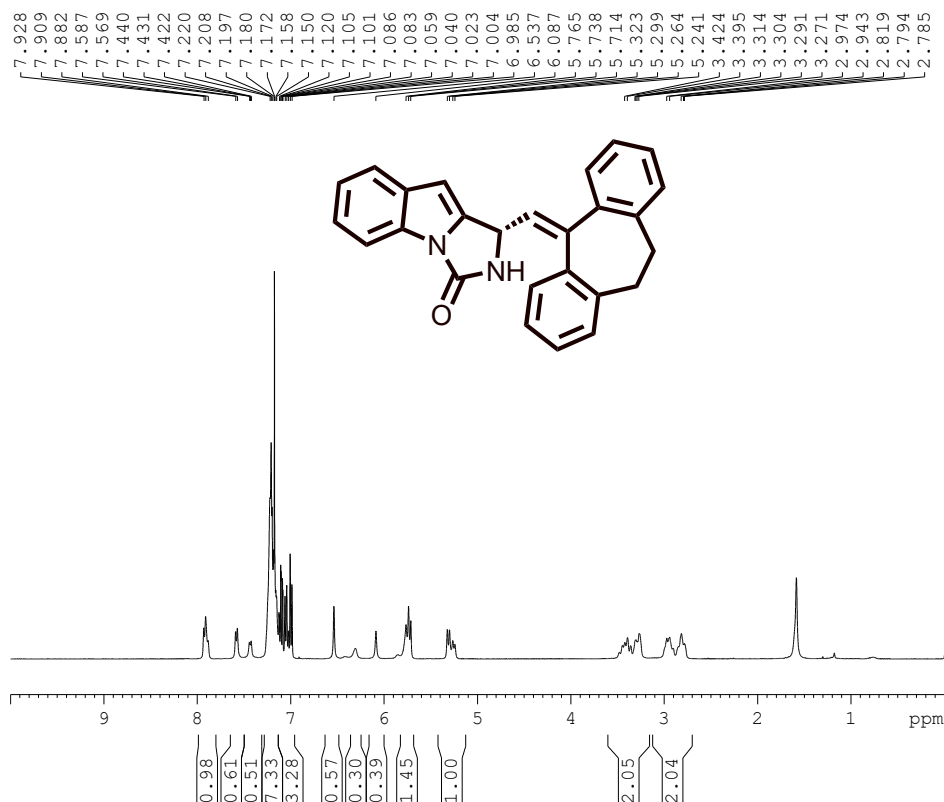

**<sup>1</sup>H NMR (400 MHz, CDCl<sub>3</sub>) spectrum of 4w**

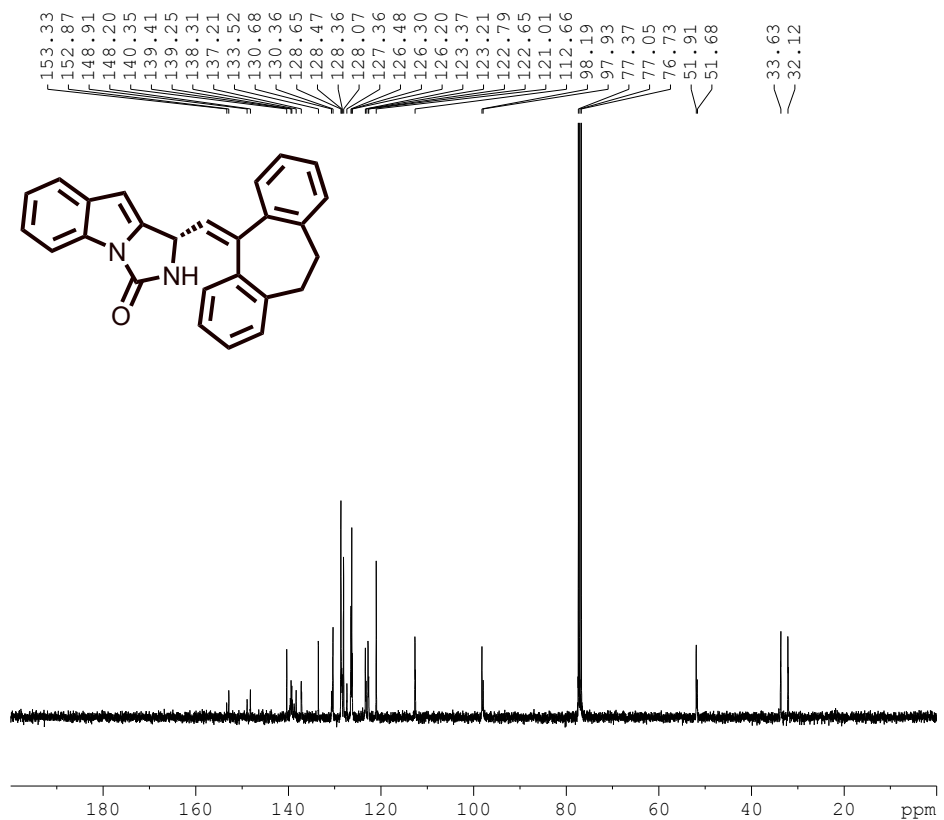

**<sup>13</sup>C NMR (100 MHz, CDCl<sub>3</sub>) spectrum of 3w**

**(S)-1-(2-phenyl-2-(p-tolyl)vinyl)-1,2-dihydro-3H-imidazo[1,5-a]indol-3-one (3x)**

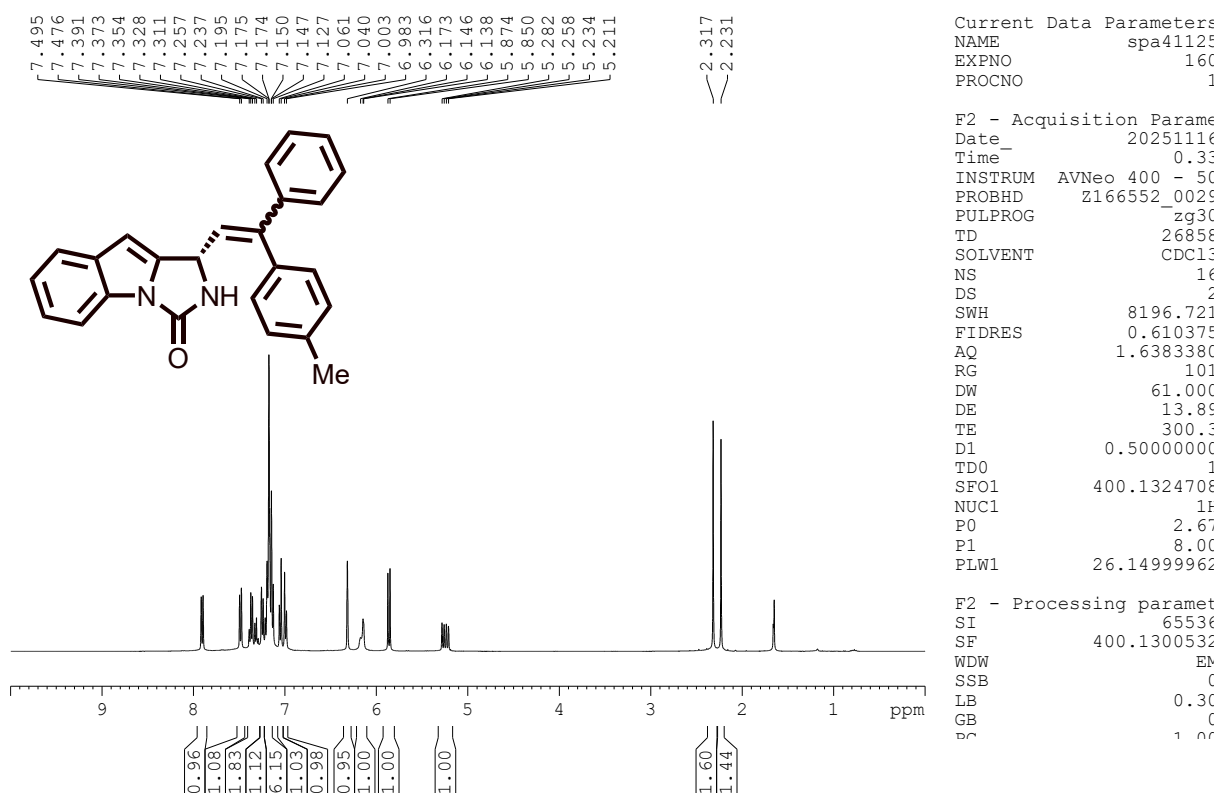

**<sup>1</sup>H NMR (400 MHz, CDCl<sub>3</sub>) spectrum of 3x**

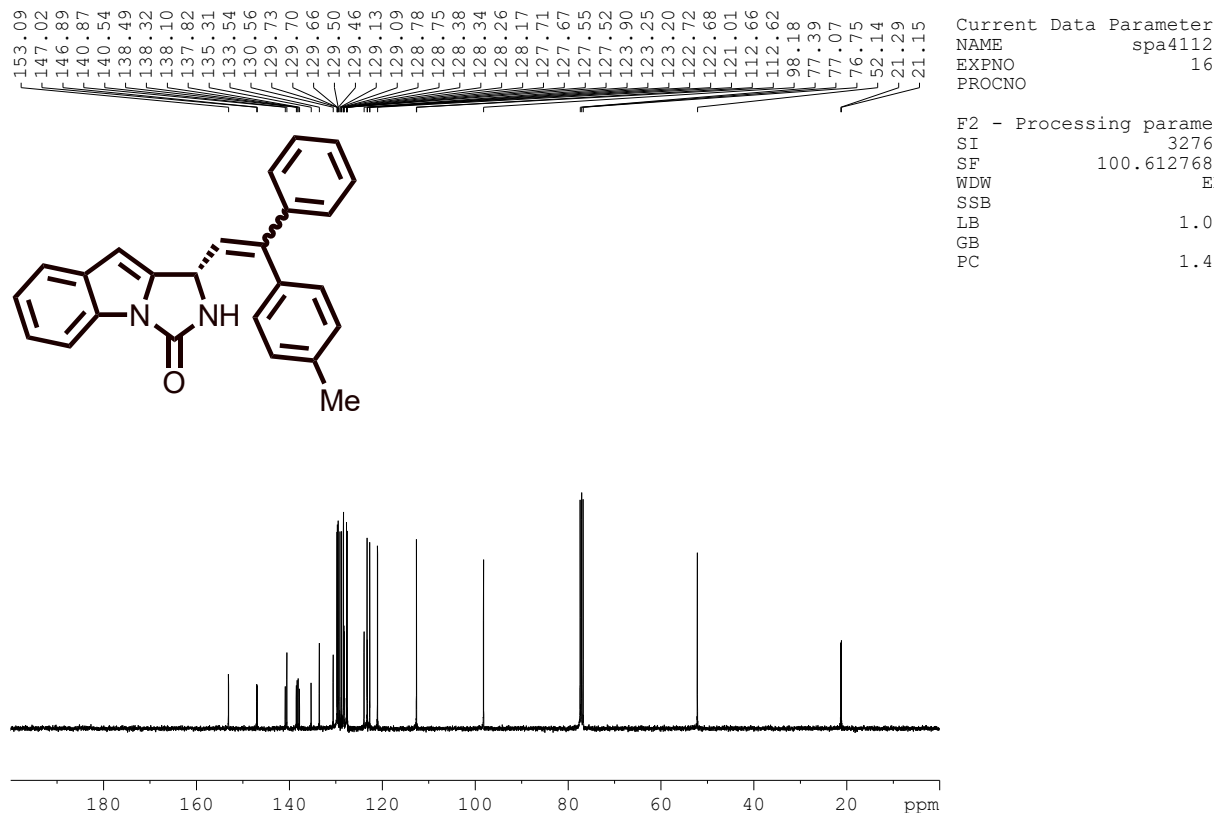

**<sup>13</sup>C NMR (100 MHz, CDCl<sub>3</sub>) spectrum of 3x**

### (S)-1-(2-phenylprop-1-en-1-yl)-1,2-dihydro-3H-imidazo[1,5-a]indol-3-one (3y)

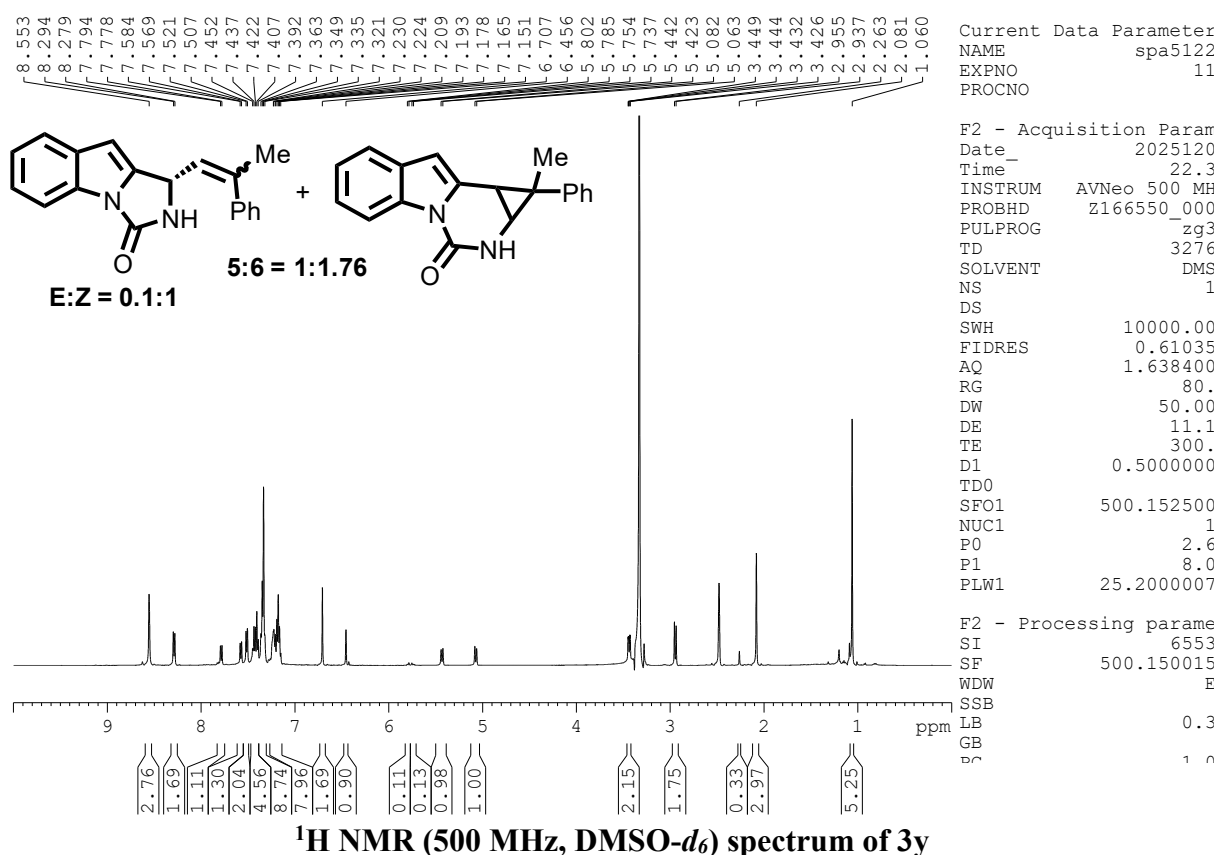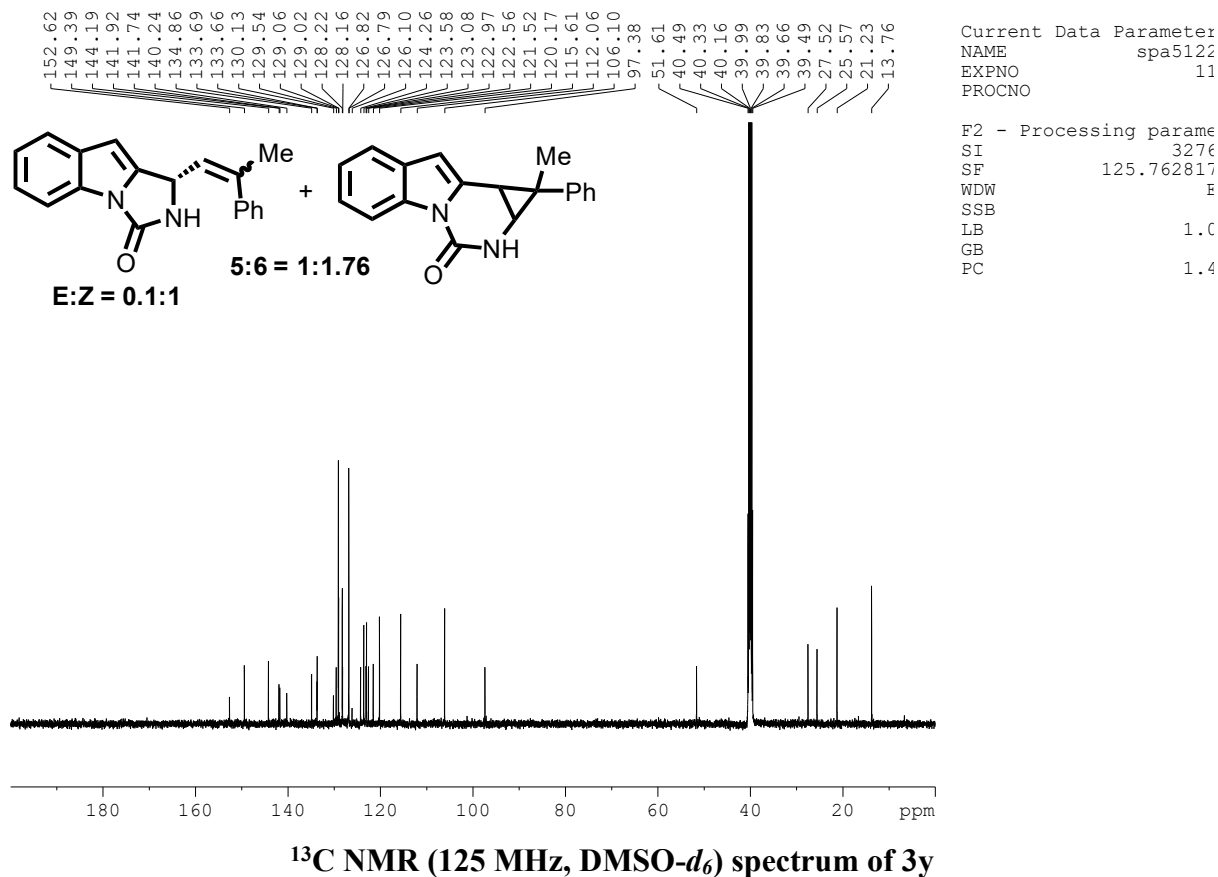

**(S)-1-(2,2-diphenylethyl)-1,2-dihydro-3H-imidazo[1,5-a]indol-3-one (4)**

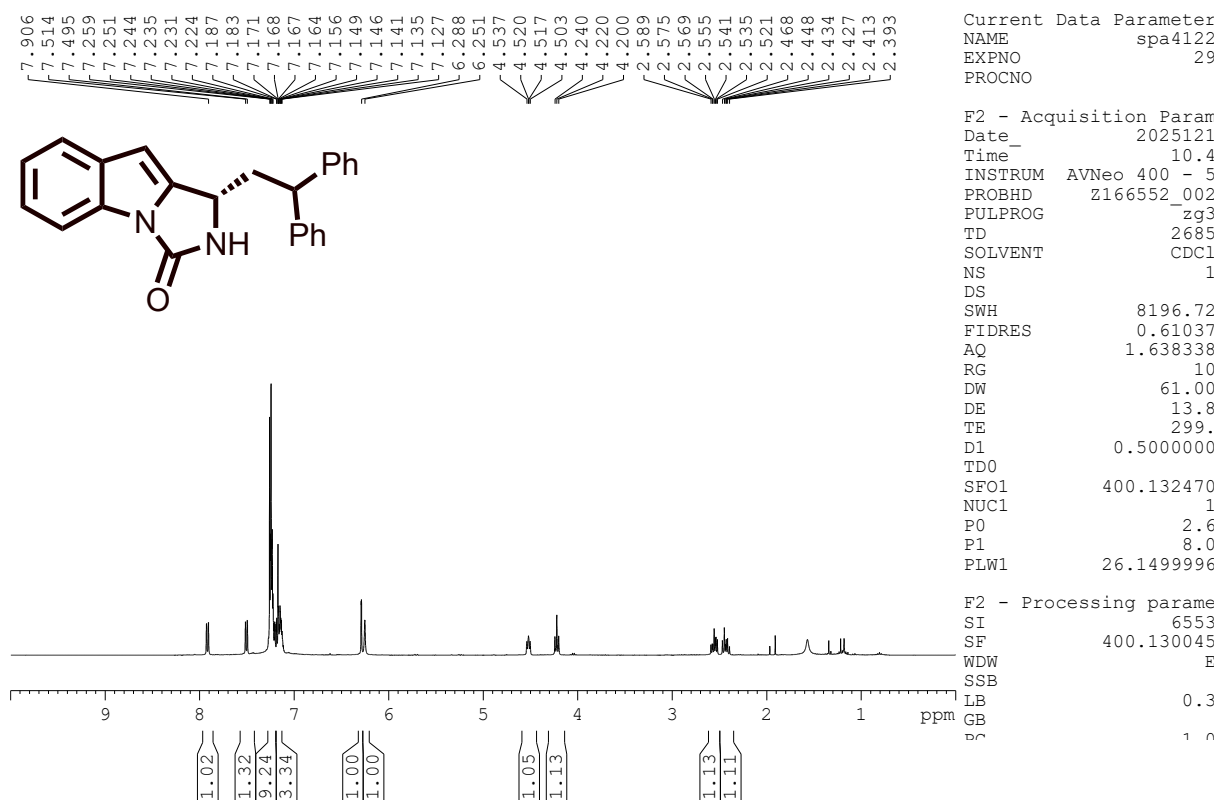

**<sup>1</sup>H NMR (400 MHz, CDCl<sub>3</sub>) spectrum of 4**

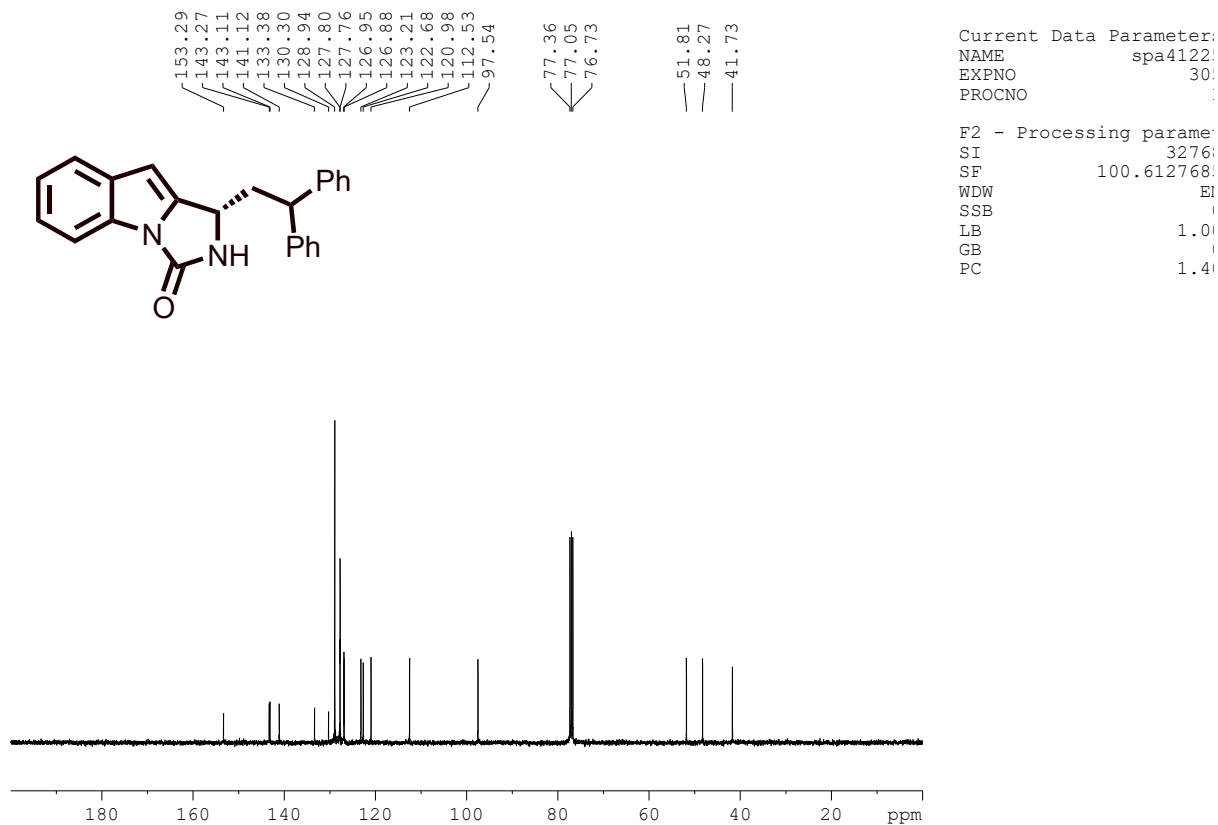

**<sup>13</sup>C NMR (100 MHz, CDCl<sub>3</sub>) spectrum of 4**

**(S)-9-bromo-1-(2,2-diphenylvinyl)-1,2-dihydro-3H-imidazo[1,5-a]indol-3-one (5)**

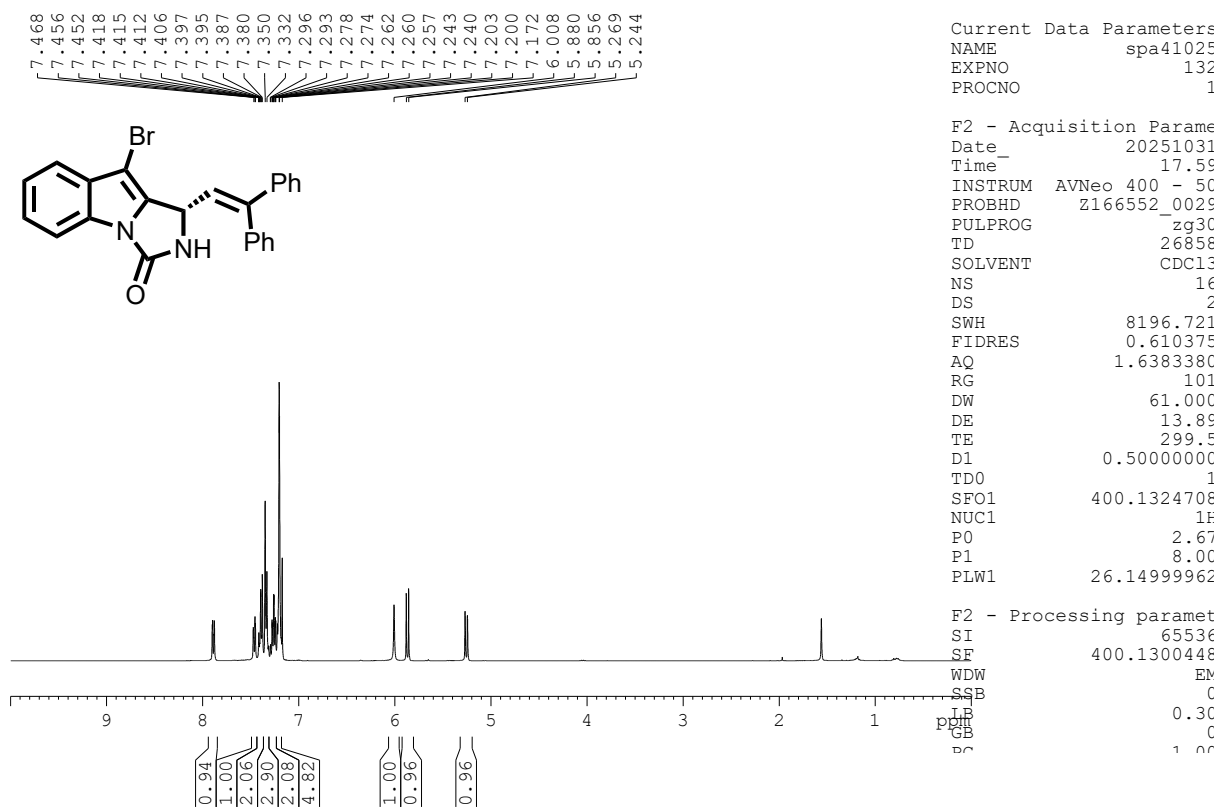

**<sup>1</sup>H NMR (400 MHz, CDCl<sub>3</sub>) spectrum of 5**

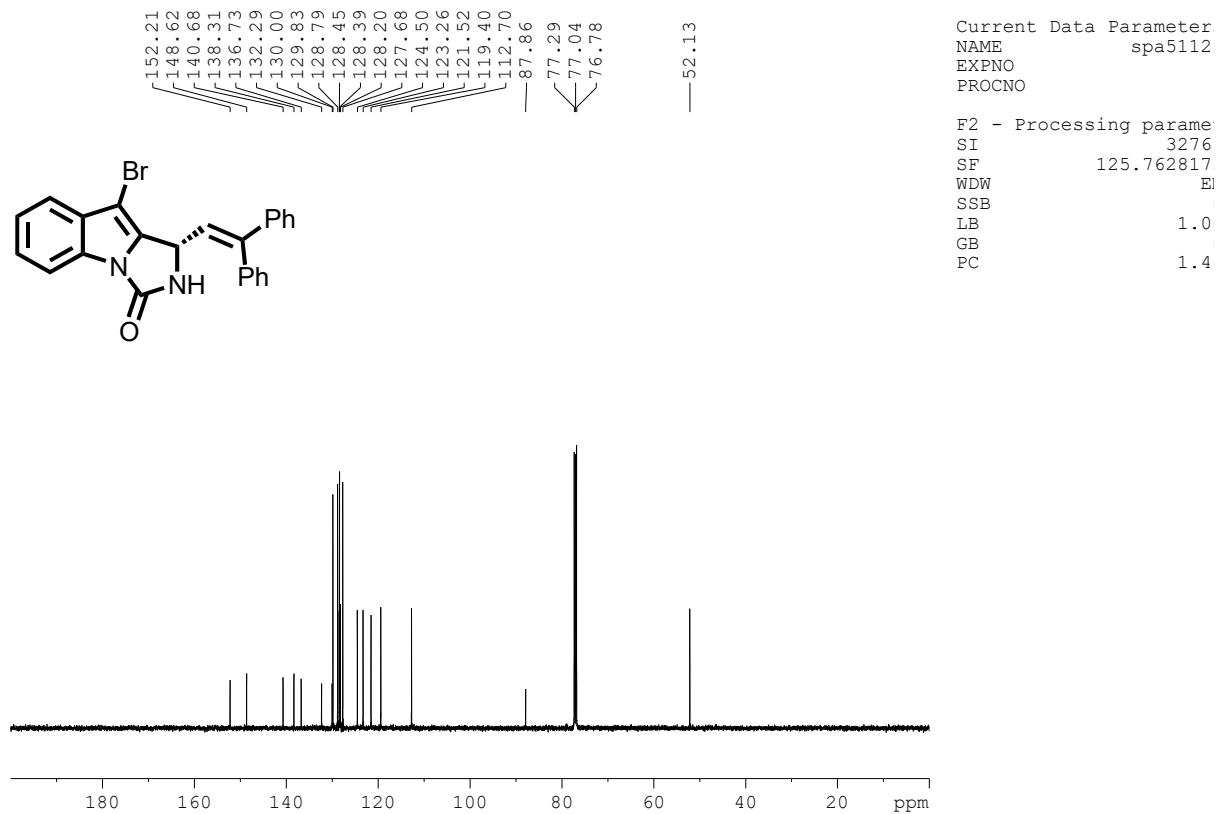

**<sup>13</sup>C NMR (100 MHz, CDCl<sub>3</sub>) spectrum of 5**

**(S)-1-(2,2-diphenylvinyl)-9-((4-fluorophenyl)thio)-1,2-dihydro-3H-imidazo[1,5-a]indol-3-one (6)**

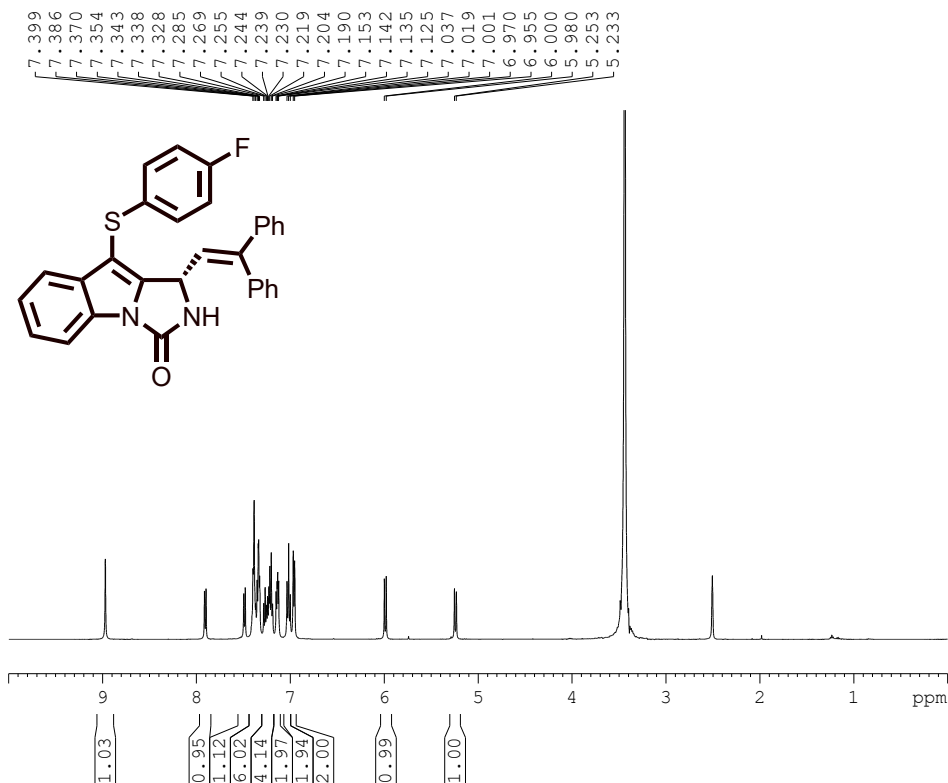

Current Data Parameter  
 NAME spa5042  
 EXPNO 13  
 PROCNO

F2 - Acquisition Param  
 Date\_ 2026041  
 Time\_ 12.3  
 INSTRUM AVNeo 500 MH  
 PROBHD Z166550\_00C  
 PULPROG zg3  
 TD 3276  
 SOLVENT DMS  
 NS 1  
 DS  
 SWH 10000.0C  
 FIDRES 0.6103E  
 AQ 1.63840C  
 RG 45.  
 DW 50.0C  
 DE 11.1  
 TE 296.  
 D1 0.500000C  
 TD0  
 SFO1 500.15250C  
 NUC1 1  
 P0 2.6  
 P1 8.C  
 PLW1 25.2000007

F2 - Processing param  
 SI 6553  
 SF 500.15000C  
 WDW E  
 SSB  
 LB 0.3  
 GB  
 PC 1.0

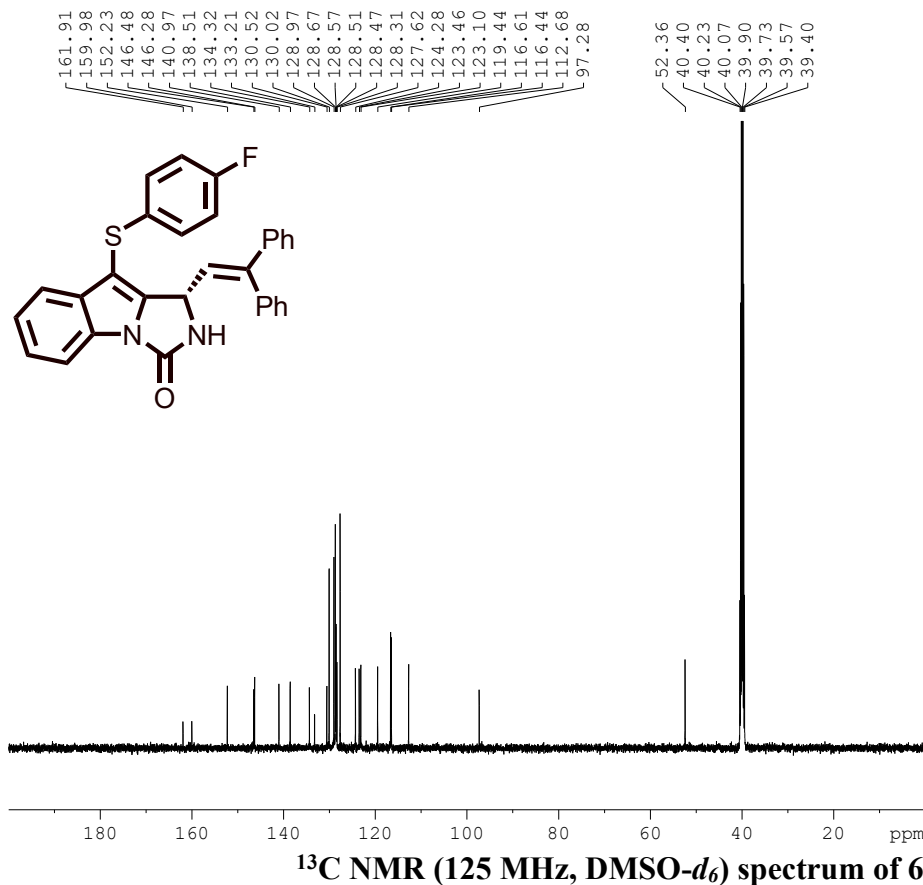

Current Data Parameter  
 NAME spa5042  
 EXPNO 13  
 PROCNO

F2 - Processing param  
 SI 3276  
 SF 125.762817  
 WDW E  
 SSB  
 LB 1.0  
 GB  
 PC 1.4

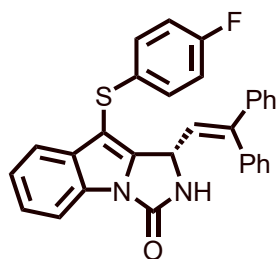

---117.55

Current Data Parameter  
NAME spa5042  
EXPNO 13  
PROCNO

F2 - Processing parame  
SI 6553  
SF 470.611196  
WDW E  
SSB  
LB 0.3  
GB  
PC 1.0

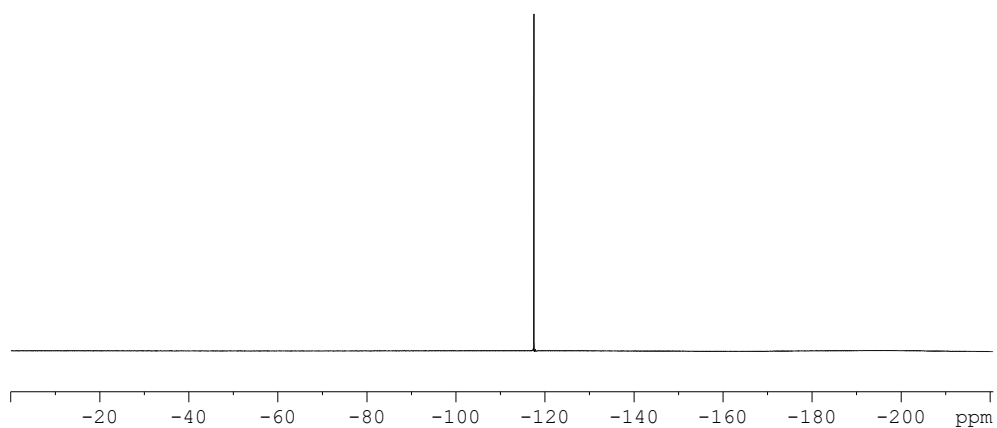

**<sup>19</sup>F NMR (470 MHz, CDCl<sub>3</sub>) spectrum of 6**

**(R)-1-((S)-3,3-diphenyloxiran-2-yl)-7-fluoro-1,2-dihydro-3H-imidazo[1,5-a]indol-3-one**

**(7)**

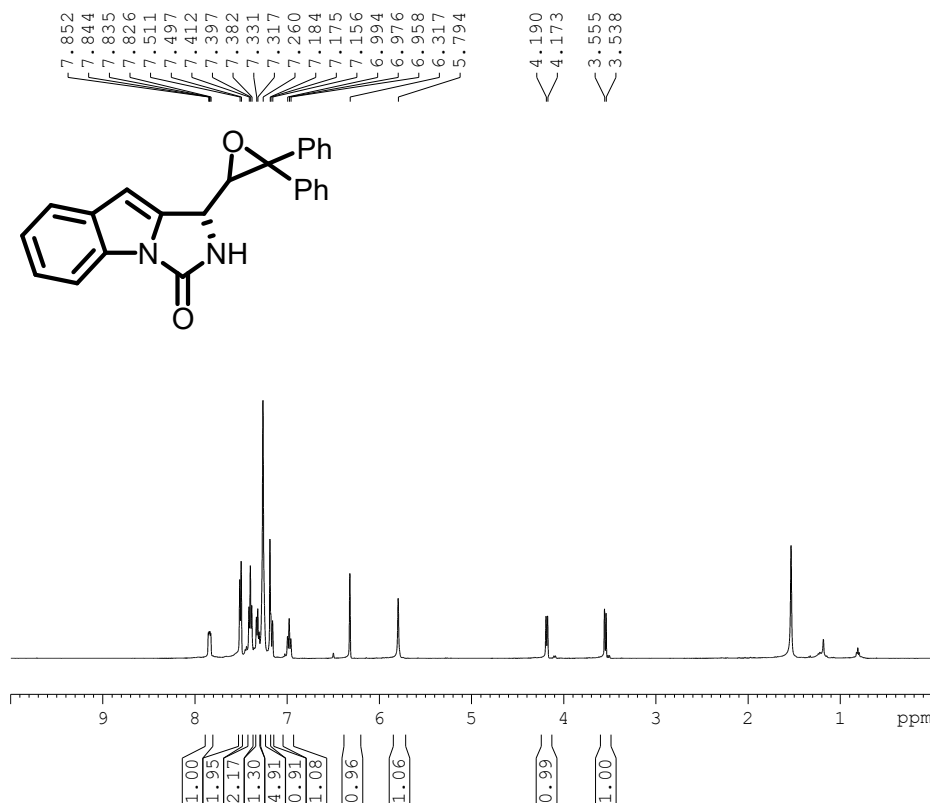

Current Data Parameter  
 NAME spa5122  
 EXPNO 39  
 PROCNO

F2 - Acquisition Param  
 Date\_ 2025121  
 Time\_ 11.1  
 INSTRUM AVNeo 500 MH  
 PROBHD Z166550\_000  
 PULPROG zg3  
 TD 3276  
 SOLVENT CDCl  
 NS 1  
 DS  
 SWH 10000.00  
 FIDRES 0.61035  
 AQ 1.638400  
 RG 10  
 DW 50.00  
 DE 11.1  
 TE 300.  
 D1 0.5000000  
 TD0  
 SFO1 500.152500  
 NUC1 1  
 P0 2.6  
 P1 8.0  
 PLW1 25.2000007

F2 - Processing param  
 SI 6553  
 SF 500.150049  
 WDW E  
 SSB  
 LB 0.3  
 GB  
 PC 1.0

**<sup>1</sup>H NMR (400 MHz, CDCl<sub>3</sub>) spectrum of 7**

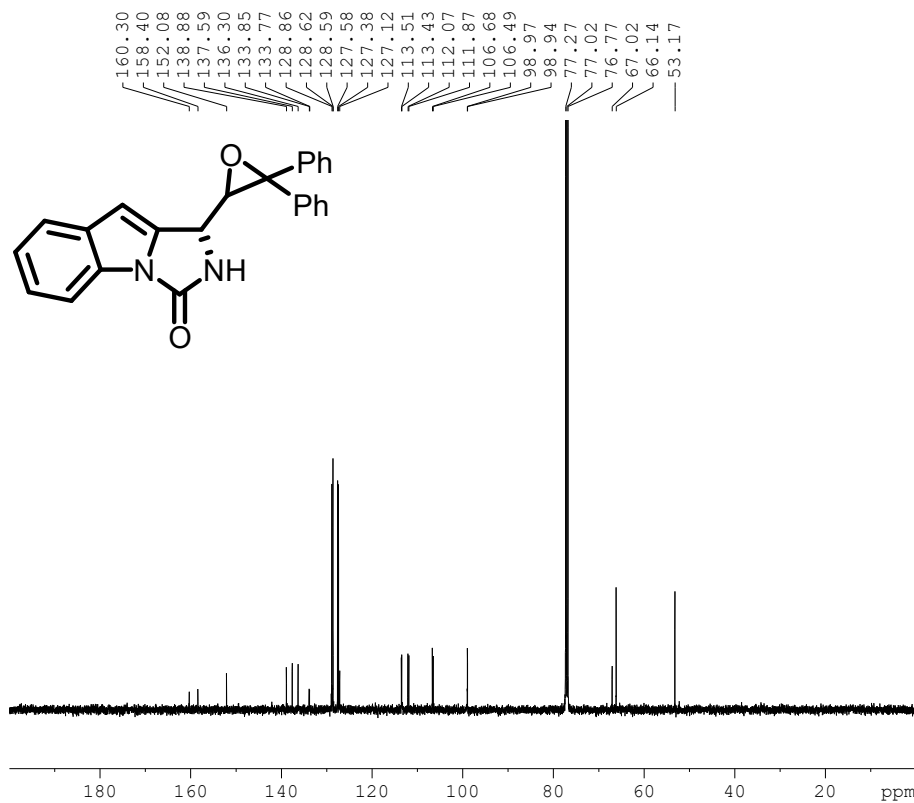

Current Data Parameter  
 NAME spa5122  
 EXPNO 40  
 PROCNO

F2 - Processing param  
 SI 3276  
 SF 125.762817  
 WDW E  
 SSB  
 LB 1.0  
 GB  
 PC 1.4

**<sup>13</sup>C NMR (100 MHz, CDCl<sub>3</sub>) spectrum of 7**

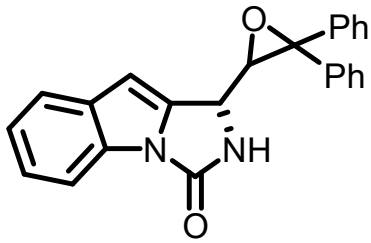

---119.71

Current Data Parameter  
NAME spa5122  
EXPNO 40  
PROCNO

F2 - Processing parame  
SI 6553  
SF 470.611196  
WDW E  
SSB  
LB 0.3  
GB  
PC 1.0

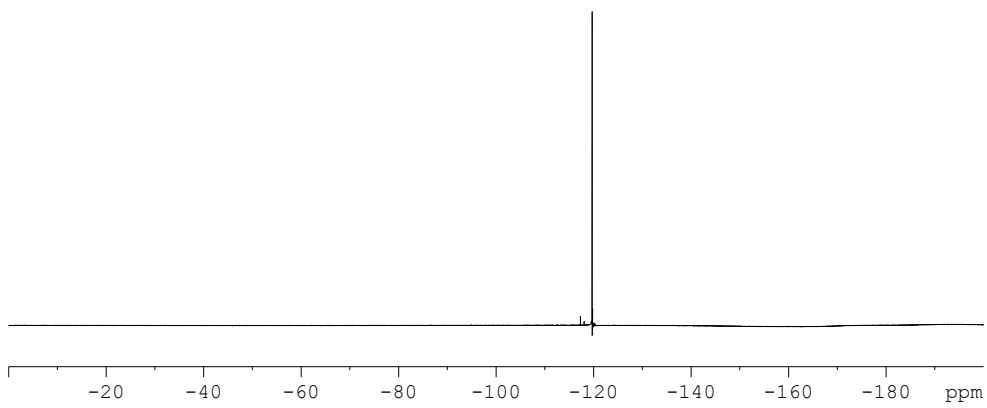

**<sup>19</sup>F NMR (470 MHz, CDCl<sub>3</sub>) spectrum of 7**

### Isolated intermediate (8)

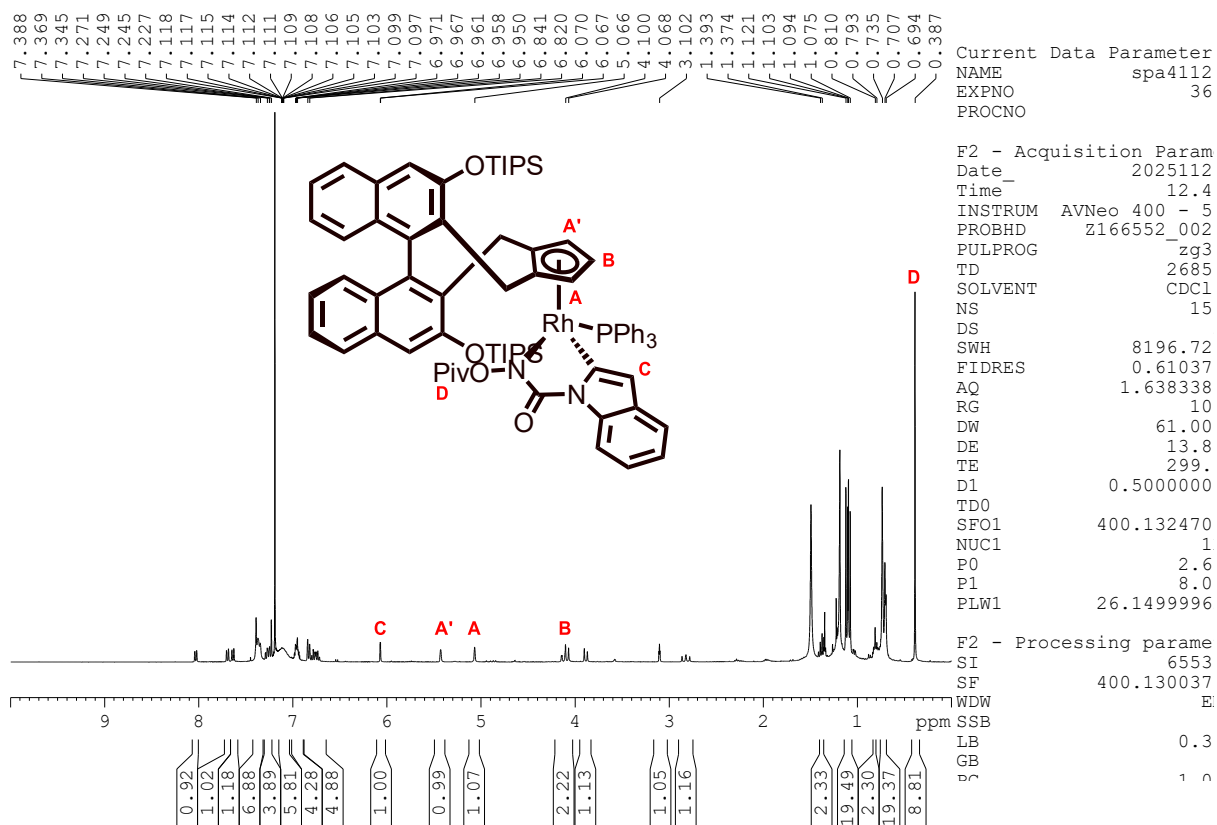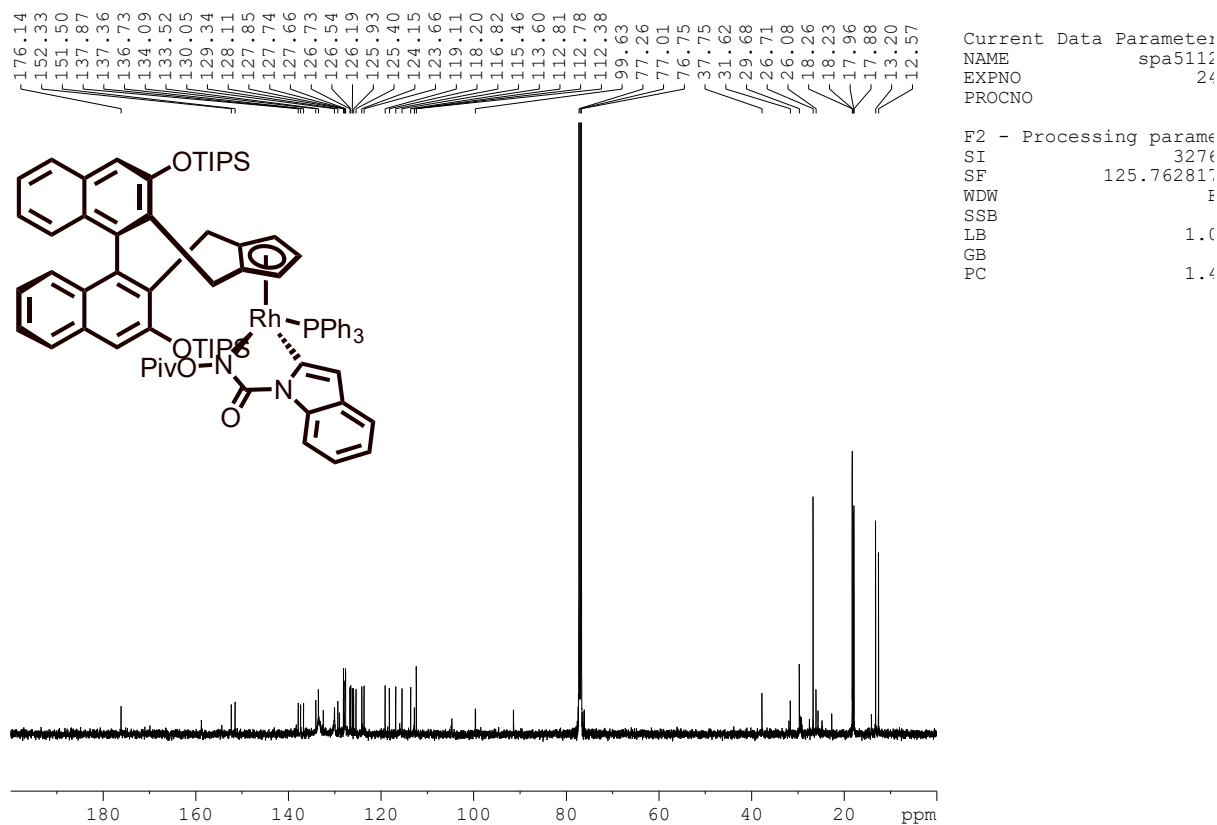

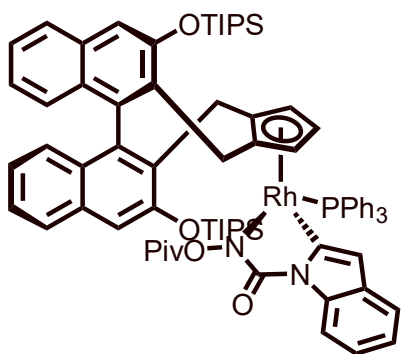

35.61  
34.88

Current Data Parameter  
NAME spa5112  
EXPNO 24  
PROCNO

F2 - Processing parame  
SI 3276  
SF 202.464431  
WDW E  
SSB  
LB 1.0  
GB  
PC 1.4

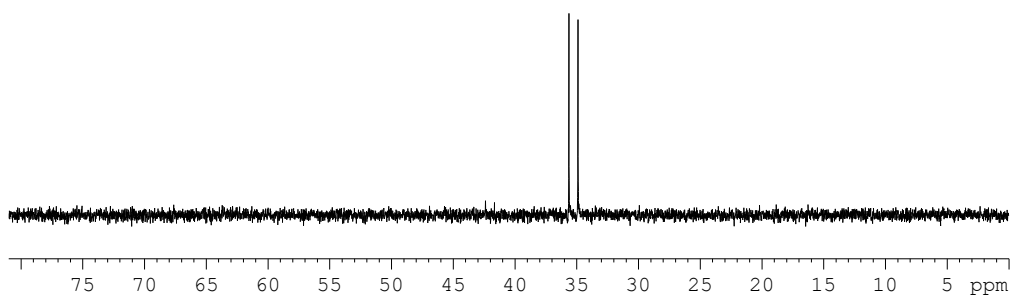

**<sup>31</sup>P NMR (202 MHz, CDCl<sub>3</sub>) spectrum of 8**

### 13. Crystal data:

#### Crystallographic data and structure refinement for compound (S)-3h

Compound (S)-3h was recrystallized from Ethylacetate: hexane (1:3) through the slow evaporation method, in a vial with a diameter of 0.75 cm and a length of 5 cm at room temperature, which afforded suitable-sized and quality crystals for X-ray diffraction.

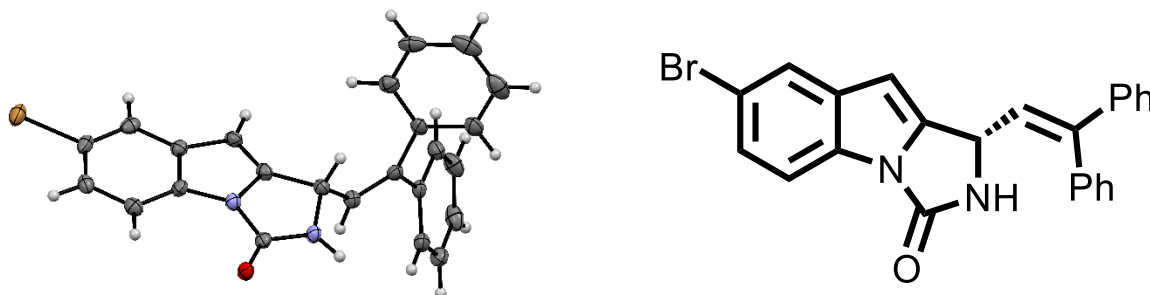

| DATA                            | (S)-3h                                                                                                             |
|---------------------------------|--------------------------------------------------------------------------------------------------------------------|
| Formula                         | C <sub>24</sub> H <sub>17</sub> BrN <sub>2</sub> O                                                                 |
| Formula weight                  | 429.30                                                                                                             |
| Colour                          | colourless                                                                                                         |
| Temperature/K                   | 100(2)/K                                                                                                           |
| Wavelength/Å                    | 0.71073 Å                                                                                                          |
| Crystal system                  | monoclinic                                                                                                         |
| Space group                     | 4, P 21, P 2yb                                                                                                     |
| Unit cell dimensions            | a = 5.9099 (3) Å alpha = 90 deg.<br>b = 31.2632 (15) Å beta = 103.579(2) deg.<br>c = 10.5445 (5) Å gamma = 90 deg. |
| Volume                          | 1893.77(16) Å <sup>3</sup>                                                                                         |
| Z, Calculated density           | 4, 1.506 Mg/m <sup>3</sup>                                                                                         |
| Absorption coefficient          | 2.188 mm <sup>-1</sup>                                                                                             |
| F(000)                          | 872                                                                                                                |
| Crystal size                    | 0.271 x 0.081 x 0.018 mm                                                                                           |
| Theta range for data collection | 1.987 to 28.315 deg.                                                                                               |
| Limiting indices                | -7 ≤ h ≤ 7, -41 ≤ k ≤ 41, -14 ≤ l ≤ 14                                                                             |

|                                   |                                    |
|-----------------------------------|------------------------------------|
| Reflections collected / unique    | 54474 / 9360                       |
| Data / restraints / parameters    | 9360 / 1 / 505                     |
| Goodness-of-fit on F <sup>2</sup> | 0.999                              |
| Final R indices [I > 2σ(I)]       | R1 = 0.0427, wR2 = 0.0862          |
| R indices (all data)              | R1 = 0.0545, wR2 = 0.0903          |
| Absolute structure parameter      | 0.025(4)                           |
| Largest diff. peak and hole       | 1.391 and -0.305 e.Å <sup>-3</sup> |

### Crystallographic data and structure refinement for compound (*R*)-3h

Compound (*R*)-3h was recrystallized from Ethylacetate: hexane (1:3) through the slow evaporation method, in a vial with a diameter of 0.75 cm and a length of 5 cm at room temperature, which afforded suitable-sized and quality crystals for X-ray diffraction.

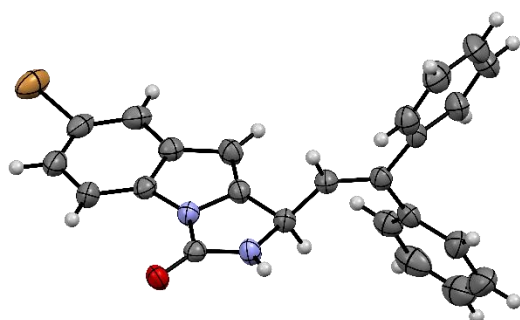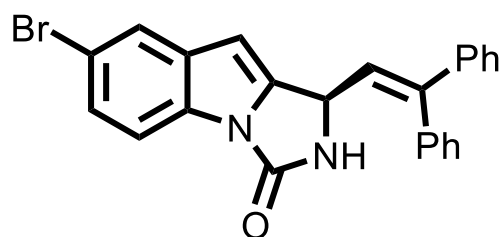

| DATA                 | ( <i>R</i> )-3h                                                                                                         |
|----------------------|-------------------------------------------------------------------------------------------------------------------------|
| Formula              | C <sub>24</sub> H <sub>17</sub> BrN <sub>2</sub> O                                                                      |
| Formula weight       | 429.30                                                                                                                  |
| Colour               | clear light colourless                                                                                                  |
| Temperature/K        | 301.15/K                                                                                                                |
| Wavelength/Å         | 0.71073 Å                                                                                                               |
| Crystal system       | monoclinic                                                                                                              |
| Space group          | 4, P 21, P 2yb                                                                                                          |
| Unit cell dimensions | a = 6.0257(6) Å    alpha = 90 deg.<br>b = 31.476(3) Å    beta = 104.128(3) deg.<br>c = 10.6328(11) Å    gamma = 90 deg. |

|                                   |                                        |
|-----------------------------------|----------------------------------------|
| Volume                            | 1955.7(3) Å <sup>3</sup>               |
| Z, Calculated density             | 4, 1.458 Mg/m <sup>3</sup>             |
| Absorption coefficient            | 2.119 mm <sup>-1</sup>                 |
| F(000)                            | 872                                    |
| Crystal size                      | 0.144 x 0.084 x 0.026 mm               |
| Theta range for data collection   | 2.3614 to 21.7967 deg.                 |
| Limiting indices                  | -8 ≤ h ≤ 7, -41 ≤ k ≤ 41, -14 ≤ l ≤ 14 |
| Reflections collected / unique    | 43869 / 9630                           |
| Data / restraints / parameters    | 9630 / 1 / 505                         |
| Goodness-of-fit on F <sup>2</sup> | 0.985                                  |
| R indices (all data)              | R1 = 0.0351, wR2 = 0.0755              |
| Absolute structure parameter      | 0.022(4)                               |
| Largest diff. peak and hole       | 0.30 and -0.339 e.Å <sup>-3</sup>      |

#### 14. References:

1. J. Liu, D.-Y. Liu, Q. Yang, Y.-F. Zeng, X.-L. Wang, P.-F. Wang, Y.-J. Ruan, M.-M. Wen, S.-S. Zhang, L.-d. Du and X.-G. Liu, *Chem. Commun.*, **2024**, 60, 598-601.
2. K. Ramachandran, P. Anbarasan, *Chem. Sci.* **2021**, 12, 13442-13449.
3. M. Bakkiyaraj, P. Anbarasan, *Org. Lett.* **2025**, 27, 1638–1643
4. B. Ye, N. Cramer, *J. Am. Chem. Soc.* **2013**, 135, 636-639.
5. Y. Sun, N. Cramer, *Chem. Sci.* **2018**, 9, 2981-2985.
6. B. Audic, M. D. Wodrich, N. Cramer, *Chem. Sci.* **2019**, 10, 781-787.
7. T. Ooi, M. Kameda, K. Maruoka, *J. Am. Chem. Soc.* **2003**, 125, 5139-5151.
